# Supplementary material
Source: PubMed Central journal article supplement (PMC7508566)
Supplement: NIHMS1611533-supplement-1.pdf [file NIHMS1611533-supplement-1.pdf]

# Exploring potentially alternative non-canonical DNA duplex structures through simulation.

## AUTHORS

Rodrigo Galindo-Murillo<sup>1</sup>, Thomas E. Cheatham III<sup>1\*</sup> and Robert C. Hopkins<sup>2</sup>

1. Department of Medicinal Chemistry, L.S. Skaggs Pharmacy Institute, University of Utah. Salt Lake City, UT 84112

2. University of Houston – Clear Lake, 2700 Bay Area Blvd, Houston, TX 77058

Supporting Information. Starting reference structures studied in this work (PDB files).

IIL

|      |    |      |     |   |        |         |         |      |      |
|------|----|------|-----|---|--------|---------|---------|------|------|
| ATOM | 1  | HO5' | DC5 | 1 | -2.787 | -10.101 | -21.706 | 1.00 | 0.00 |
| ATOM | 2  | O5'  | DC5 | 1 | -3.048 | -9.527  | -20.982 | 1.00 | 0.00 |
| ATOM | 3  | C5'  | DC5 | 1 | -4.428 | -9.271  | -20.770 | 1.00 | 0.00 |
| ATOM | 4  | H5'  | DC5 | 1 | -4.920 | -10.226 | -20.585 | 1.00 | 0.00 |
| ATOM | 5  | H5'' | DC5 | 1 | -4.842 | -8.818  | -21.671 | 1.00 | 0.00 |
| ATOM | 6  | C4'  | DC5 | 1 | -4.670 | -8.350  | -19.593 | 1.00 | 0.00 |
| ATOM | 7  | H4'  | DC5 | 1 | -4.601 | -8.924  | -18.669 | 1.00 | 0.00 |
| ATOM | 8  | O4'  | DC5 | 1 | -3.644 | -7.339  | -19.469 | 1.00 | 0.00 |
| ATOM | 9  | C1'  | DC5 | 1 | -4.233 | -6.295  | -18.700 | 1.00 | 0.00 |
| ATOM | 10 | H1'  | DC5 | 1 | -4.290 | -6.587  | -17.651 | 1.00 | 0.00 |
| ATOM | 11 | N1   | DC5 | 1 | -3.272 | -5.194  | -18.700 | 1.00 | 0.00 |
| ATOM | 12 | C6   | DC5 | 1 | -1.944 | -5.522  | -18.700 | 1.00 | 0.00 |
| ATOM | 13 | H6   | DC5 | 1 | -1.635 | -6.557  | -18.700 | 1.00 | 0.00 |
| ATOM | 14 | C5   | DC5 | 1 | -0.982 | -4.538  | -18.700 | 1.00 | 0.00 |
| ATOM | 15 | H5   | DC5 | 1 | 0.077  | -4.796  | -18.700 | 1.00 | 0.00 |
| ATOM | 16 | C4   | DC5 | 1 | -1.440 | -3.239  | -18.700 | 1.00 | 0.00 |
| ATOM | 17 | N4   | DC5 | 1 | -0.590 | -2.222  | -18.700 | 1.00 | 0.00 |
| ATOM | 18 | H41  | DC5 | 1 | -0.975 | -1.288  | -18.700 | 1.00 | 0.00 |
| ATOM | 19 | H42  | DC5 | 1 | 0.406  | -2.391  | -18.700 | 1.00 | 0.00 |
| ATOM | 20 | N3   | DC5 | 1 | -2.766 | -2.941  | -18.700 | 1.00 | 0.00 |
| ATOM | 21 | C2   | DC5 | 1 | -3.704 | -3.921  | -18.700 | 1.00 | 0.00 |
| ATOM | 22 | O2   | DC5 | 1 | -4.902 | -3.662  | -18.700 | 1.00 | 0.00 |
| ATOM | 23 | C3'  | DC5 | 1 | -5.969 | -7.557  | -19.707 | 1.00 | 0.00 |
| ATOM | 24 | H3'  | DC5 | 1 | -6.421 | -7.636  | -20.696 | 1.00 | 0.00 |
| ATOM | 25 | C2'  | DC5 | 1 | -5.540 | -6.115  | -19.458 | 1.00 | 0.00 |
| ATOM | 26 | H2'  | DC5 | 1 | -5.919 | -5.479  | -20.258 | 1.00 | 0.00 |
| ATOM | 27 | H2'' | DC5 | 1 | -5.942 | -5.775  | -18.504 | 1.00 | 0.00 |
| ATOM | 28 | O3'  | DC5 | 1 | -6.919 | -8.040  | -18.759 | 1.00 | 0.00 |
| ATOM | 29 | P    | DG  | 2 | -8.324 | -7.306  | -18.569 | 1.00 | 0.00 |
| ATOM | 30 | OP1  | DG  | 2 | -8.792 | -6.827  | -19.889 | 1.00 | 0.00 |
| ATOM | 31 | OP2  | DG  | 2 | -9.242 | -8.198  | -17.831 | 1.00 | 0.00 |
| ATOM | 32 | O5'  | DG  | 2 | -7.921 | -6.109  | -17.582 | 1.00 | 0.00 |
| ATOM | 33 | C5'  | DG  | 2 | -8.911 | -5.114  | -17.370 | 1.00 | 0.00 |
| ATOM | 34 | H5'  | DG  | 2 | -9.858 | -5.621  | -17.185 | 1.00 | 0.00 |
| ATOM | 35 | H5'' | DG  | 2 | -8.992 | -4.487  | -18.258 | 1.00 | 0.00 |
| ATOM | 36 | C4'  | DG  | 2 | -8.587 | -4.218  | -16.193 | 1.00 | 0.00 |
| ATOM | 37 | H4'  | DG  | 2 | -8.856 | -4.730  | -15.269 | 1.00 | 0.00 |
| ATOM | 38 | O4'  | DG  | 2 | -7.169 | -3.969  | -16.069 | 1.00 | 0.00 |
| ATOM | 39 | C1'  | DG  | 2 | -7.060 | -2.775  | -15.300 | 1.00 | 0.00 |
| ATOM | 40 | H1'  | DG  | 2 | -7.274 | -2.981  | -14.251 | 1.00 | 0.00 |
| ATOM | 41 | N9   | DG  | 2 | -5.644 | -2.416  | -15.300 | 1.00 | 0.00 |
| ATOM | 42 | C8   | DG  | 2 | -4.578 | -3.286  | -15.300 | 1.00 | 0.00 |
| ATOM | 43 | H8   | DG  | 2 | -4.708 | -4.358  | -15.298 | 1.00 | 0.00 |

|      |     |      |    |   |         |        |         |      |      |
|------|-----|------|----|---|---------|--------|---------|------|------|
| ATOM | 44  | N7   | DG | 2 | -3.406  | -2.634 | -15.300 | 1.00 | 0.00 |
| ATOM | 45  | C5   | DG | 2 | -3.772  | -1.337 | -15.300 | 1.00 | 0.00 |
| ATOM | 46  | C6   | DG | 2 | -2.984  | -0.176 | -15.300 | 1.00 | 0.00 |
| ATOM | 47  | O6   | DG | 2 | -1.754  | -0.087 | -15.300 | 1.00 | 0.00 |
| ATOM | 48  | N1   | DG | 2 | -3.753  | 0.962  | -15.300 | 1.00 | 0.00 |
| ATOM | 49  | H1   | DG | 2 | -3.244  | 1.823  | -15.300 | 1.00 | 0.00 |
| ATOM | 50  | C2   | DG | 2 | -5.112  | 1.038  | -15.300 | 1.00 | 0.00 |
| ATOM | 51  | N2   | DG | 2 | -5.674  | 2.250  | -15.300 | 1.00 | 0.00 |
| ATOM | 52  | H21  | DG | 2 | -5.198  | 3.141  | -15.288 | 1.00 | 0.00 |
| ATOM | 53  | H22  | DG | 2 | -6.684  | 2.279  | -15.291 | 1.00 | 0.00 |
| ATOM | 54  | N3   | DG | 2 | -5.867  | -0.058 | -15.300 | 1.00 | 0.00 |
| ATOM | 55  | C4   | DG | 2 | -5.138  | -1.180 | -15.300 | 1.00 | 0.00 |
| ATOM | 56  | C3'  | DG | 2 | -9.206  | -2.828 | -16.307 | 1.00 | 0.00 |
| ATOM | 57  | H3'  | DG | 2 | -9.623  | -2.636 | -17.296 | 1.00 | 0.00 |
| ATOM | 58  | C2'  | DG | 2 | -8.033  | -1.885 | -16.058 | 1.00 | 0.00 |
| ATOM | 59  | H2'  | DG | 2 | -7.983  | -1.147 | -16.859 | 1.00 | 0.00 |
| ATOM | 60  | H2'' | DG | 2 | -8.171  | -1.377 | -15.104 | 1.00 | 0.00 |
| ATOM | 61  | O3'  | DG | 2 | -10.261 | -2.685 | -15.359 | 1.00 | 0.00 |
| ATOM | 62  | P    | DC | 3 | -11.000 | -1.283 | -15.169 | 1.00 | 0.00 |
| ATOM | 63  | OP1  | DC | 3 | -11.114 | -0.623 | -16.489 | 1.00 | 0.00 |
| ATOM | 64  | OP2  | DC | 3 | -12.263 | -1.496 | -14.431 | 1.00 | 0.00 |
| ATOM | 65  | O5'  | DC | 3 | -9.989  | -0.527 | -14.182 | 1.00 | 0.00 |
| ATOM | 66  | C5'  | DC | 3 | -10.238 | 0.854  | -13.970 | 1.00 | 0.00 |
| ATOM | 67  | H5'  | DC | 3 | -11.305 | 0.976  | -13.786 | 1.00 | 0.00 |
| ATOM | 68  | H5'' | DC | 3 | -9.948  | 1.416  | -14.857 | 1.00 | 0.00 |
| ATOM | 69  | C4'  | DC | 3 | -9.463  | 1.407  | -12.793 | 1.00 | 0.00 |
| ATOM | 70  | H4'  | DC | 3 | -9.975  | 1.139  | -11.869 | 1.00 | 0.00 |
| ATOM | 71  | O4'  | DC | 3 | -8.154  | 0.807  | -12.669 | 1.00 | 0.00 |
| ATOM | 72  | C1'  | DC | 3 | -7.387  | 1.727  | -11.900 | 1.00 | 0.00 |
| ATOM | 73  | H1'  | DC | 3 | -7.680  | 1.677  | -10.851 | 1.00 | 0.00 |
| ATOM | 74  | N1   | DC | 3 | -6.017  | 1.218  | -11.900 | 1.00 | 0.00 |
| ATOM | 75  | C6   | DC | 3 | -5.852  | -0.139 | -11.900 | 1.00 | 0.00 |
| ATOM | 76  | H6   | DC | 3 | -6.710  | -0.794 | -11.900 | 1.00 | 0.00 |
| ATOM | 77  | C5   | DC | 3 | -4.591  | -0.691 | -11.900 | 1.00 | 0.00 |
| ATOM | 78  | H5   | DC | 3 | -4.456  | -1.773 | -11.900 | 1.00 | 0.00 |
| ATOM | 79  | C4   | DC | 3 | -3.539  | 0.198  | -11.900 | 1.00 | 0.00 |
| ATOM | 80  | N4   | DC | 3 | -2.287  | -0.236 | -11.900 | 1.00 | 0.00 |
| ATOM | 81  | H41  | DC | 3 | -1.551  | 0.455  | -11.900 | 1.00 | 0.00 |
| ATOM | 82  | H42  | DC | 3 | -2.092  | -1.227 | -11.900 | 1.00 | 0.00 |
| ATOM | 83  | N3   | DC | 3 | -3.730  | 1.544  | -11.900 | 1.00 | 0.00 |
| ATOM | 84  | C2   | DC | 3 | -4.979  | 2.074  | -11.900 | 1.00 | 0.00 |
| ATOM | 85  | O2   | DC | 3 | -5.162  | 3.286  | -11.900 | 1.00 | 0.00 |
| ATOM | 86  | C3'  | DC | 3 | -9.182  | 2.903  | -12.907 | 1.00 | 0.00 |
| ATOM | 87  | H3'  | DC | 3 | -9.416  | 3.298  | -13.896 | 1.00 | 0.00 |
| ATOM | 88  | C2'  | DC | 3 | -7.681  | 3.012  | -12.658 | 1.00 | 0.00 |
| ATOM | 89  | H2'  | DC | 3 | -7.220  | 3.591  | -13.459 | 1.00 | 0.00 |
| ATOM | 90  | H2'' | DC | 3 | -7.506  | 3.509  | -11.704 | 1.00 | 0.00 |
| ATOM | 91  | O3'  | DC | 3 | -9.970  | 3.620  | -11.959 | 1.00 | 0.00 |
| ATOM | 92  | P    | DG | 4 | -9.782  | 5.194  | -11.769 | 1.00 | 0.00 |
| ATOM | 93  | OP1  | DG | 4 | -9.500  | 5.801  | -13.089 | 1.00 | 0.00 |
| ATOM | 94  | OP2  | DG | 4 | -10.942 | 5.736  | -11.031 | 1.00 | 0.00 |
| ATOM | 95  | O5'  | DG | 4 | -8.520  | 5.242  | -10.782 | 1.00 | 0.00 |
| ATOM | 96  | C5'  | DG | 4 | -7.940  | 6.520  | -10.570 | 1.00 | 0.00 |
| ATOM | 97  | H5'  | DG | 4 | -8.749  | 7.227  | -10.385 | 1.00 | 0.00 |
| ATOM | 98  | H5'' | DG | 4 | -7.382  | 6.818  | -11.457 | 1.00 | 0.00 |
| ATOM | 99  | C4'  | DG | 4 | -6.988  | 6.534  | -9.393  | 1.00 | 0.00 |
| ATOM | 100 | H4'  | DG | 4 | -7.562  | 6.604  | -8.469  | 1.00 | 0.00 |
| ATOM | 101 | O4'  | DG | 4 | -6.252  | 5.296  | -9.269  | 1.00 | 0.00 |
| ATOM | 102 | C1'  | DG | 4 | -5.097  | 5.618  | -8.500  | 1.00 | 0.00 |
| ATOM | 103 | H1'  | DG | 4 | -5.365  | 5.745  | -7.451  | 1.00 | 0.00 |

|      |     |      |    |   |        |        |         |      |      |
|------|-----|------|----|---|--------|--------|---------|------|------|
| ATOM | 104 | N9   | DG | 4 | -4.259 | 4.421  | -8.500  | 1.00 | 0.00 |
| ATOM | 105 | C8   | DG | 4 | -4.695 | 3.116  | -8.500  | 1.00 | 0.00 |
| ATOM | 106 | H8   | DG | 4 | -5.744 | 2.858  | -8.498  | 1.00 | 0.00 |
| ATOM | 107 | N7   | DG | 4 | -3.671 | 2.251  | -8.500  | 1.00 | 0.00 |
| ATOM | 108 | C5   | DG | 4 | -2.587 | 3.053  | -8.500  | 1.00 | 0.00 |
| ATOM | 109 | C6   | DG | 4 | -1.222 | 2.728  | -8.500  | 1.00 | 0.00 |
| ATOM | 110 | O6   | DG | 4 | -0.703 | 1.609  | -8.500  | 1.00 | 0.00 |
| ATOM | 111 | N1   | DG | 4 | -0.431 | 3.850  | -8.500  | 1.00 | 0.00 |
| ATOM | 112 | H1   | DG | 4 | 0.554  | 3.679  | -8.500  | 1.00 | 0.00 |
| ATOM | 113 | C2   | DG | 4 | -0.841 | 5.148  | -8.500  | 1.00 | 0.00 |
| ATOM | 114 | N2   | DG | 4 | 0.093  | 6.103  | -8.500  | 1.00 | 0.00 |
| ATOM | 115 | H21  | DG | 4 | 1.095  | 5.974  | -8.488  | 1.00 | 0.00 |
| ATOM | 116 | H22  | DG | 4 | -0.238 | 7.057  | -8.491  | 1.00 | 0.00 |
| ATOM | 117 | N3   | DG | 4 | -2.133 | 5.465  | -8.500  | 1.00 | 0.00 |
| ATOM | 118 | C4   | DG | 4 | -2.925 | 4.386  | -8.500  | 1.00 | 0.00 |
| ATOM | 119 | C3'  | DG | 4 | -5.907 | 7.606  | -9.507  | 1.00 | 0.00 |
| ATOM | 120 | H3'  | DG | 4 | -5.875 | 8.064  | -10.495 | 1.00 | 0.00 |
| ATOM | 121 | C2'  | DG | 4 | -4.610 | 6.843  | -9.258  | 1.00 | 0.00 |
| ATOM | 122 | H2'  | DG | 4 | -3.902 | 7.057  | -10.059 | 1.00 | 0.00 |
| ATOM | 123 | H2'' | DG | 4 | -4.183 | 7.153  | -8.304  | 1.00 | 0.00 |
| ATOM | 124 | O3'  | DG | 4 | -6.148 | 8.643  | -8.559  | 1.00 | 0.00 |
| ATOM | 125 | P    | DA | 5 | -5.099 | 9.831  | -8.369  | 1.00 | 0.00 |
| ATOM | 126 | OP1  | DA | 5 | -4.522 | 10.171 | -9.689  | 1.00 | 0.00 |
| ATOM | 127 | OP2  | DA | 5 | -5.746 | 10.937 | -7.631  | 1.00 | 0.00 |
| ATOM | 128 | O5'  | DA | 5 | -4.033 | 9.154  | -7.382  | 1.00 | 0.00 |
| ATOM | 129 | C5'  | DA | 5 | -2.831 | 9.876  | -7.170  | 1.00 | 0.00 |
| ATOM | 130 | H5'  | DA | 5 | -3.095 | 10.917 | -6.985  | 1.00 | 0.00 |
| ATOM | 131 | H5'' | DA | 5 | -2.202 | 9.804  | -8.057  | 1.00 | 0.00 |
| ATOM | 132 | C4'  | DA | 5 | -2.039 | 9.347  | -5.993  | 1.00 | 0.00 |
| ATOM | 133 | H4'  | DA | 5 | -2.472 | 9.731  | -5.069  | 1.00 | 0.00 |
| ATOM | 134 | O4'  | DA | 5 | -2.136 | 7.911  | -5.869  | 1.00 | 0.00 |
| ATOM | 135 | C1'  | DA | 5 | -1.003 | 7.519  | -5.100  | 1.00 | 0.00 |
| ATOM | 136 | H1'  | DA | 5 | -1.084 | 7.764  | -4.041  | 1.00 | 0.00 |
| ATOM | 137 | N9   | DA | 5 | -0.993 | 6.058  | -5.100  | 1.00 | 0.00 |
| ATOM | 138 | C8   | DA | 5 | -2.014 | 5.149  | -5.100  | 1.00 | 0.00 |
| ATOM | 139 | H8   | DA | 5 | -3.049 | 5.454  | -5.149  | 1.00 | 0.00 |
| ATOM | 140 | N7   | DA | 5 | -1.563 | 3.883  | -5.100  | 1.00 | 0.00 |
| ATOM | 141 | C5   | DA | 5 | -0.226 | 4.006  | -5.100  | 1.00 | 0.00 |
| ATOM | 142 | C6   | DA | 5 | 0.802  | 3.053  | -5.100  | 1.00 | 0.00 |
| ATOM | 143 | N6   | DA | 5 | 0.581  | 1.736  | -5.100  | 1.00 | 0.00 |
| ATOM | 144 | H61  | DA | 5 | 1.360  | 1.093  | -5.100  | 1.00 | 0.00 |
| ATOM | 145 | H62  | DA | 5 | -0.365 | 1.383  | -5.100  | 1.00 | 0.00 |
| ATOM | 146 | N1   | DA | 5 | 2.050  | 3.524  | -5.100  | 1.00 | 0.00 |
| ATOM | 147 | C2   | DA | 5 | 2.304  | 4.832  | -5.100  | 1.00 | 0.00 |
| ATOM | 148 | H2   | DA | 5 | 3.313  | 5.216  | -5.100  | 1.00 | 0.00 |
| ATOM | 149 | N3   | DA | 5 | 1.418  | 5.827  | -5.100  | 1.00 | 0.00 |
| ATOM | 150 | C4   | DA | 5 | 0.163  | 5.329  | -5.100  | 1.00 | 0.00 |
| ATOM | 151 | C3'  | DA | 5 | -0.540 | 9.615  | -6.107  | 1.00 | 0.00 |
| ATOM | 152 | H3'  | DA | 5 | -0.253 | 9.974  | -7.096  | 1.00 | 0.00 |
| ATOM | 153 | C2'  | DA | 5 | 0.094  | 8.250  | -5.858  | 1.00 | 0.00 |
| ATOM | 154 | H2'  | DA | 5 | 0.798  | 8.024  | -6.659  | 1.00 | 0.00 |
| ATOM | 155 | H2'' | DA | 5 | 0.621  | 8.262  | -4.904  | 1.00 | 0.00 |
| ATOM | 156 | O3'  | DA | 5 | -0.149 | 10.606 | -5.159  | 1.00 | 0.00 |
| ATOM | 157 | P    | DA | 6 | 1.389  | 10.988 | -4.969  | 1.00 | 0.00 |
| ATOM | 158 | OP1  | DA | 6 | 2.057  | 10.939 | -6.289  | 1.00 | 0.00 |
| ATOM | 159 | OP2  | DA | 6 | 1.485  | 12.264 | -4.231  | 1.00 | 0.00 |
| ATOM | 160 | O5'  | DA | 6 | 1.881  | 9.824  | -3.982  | 1.00 | 0.00 |
| ATOM | 161 | C5'  | DA | 6 | 3.282  | 9.736  | -3.770  | 1.00 | 0.00 |
| ATOM | 162 | H5'  | DA | 6 | 3.655  | 10.743 | -3.584  | 1.00 | 0.00 |
| ATOM | 163 | H5'' | DA | 6 | 3.759  | 9.321  | -4.658  | 1.00 | 0.00 |

|      |     |      |    |   |        |       |        |      |      |
|------|-----|------|----|---|--------|-------|--------|------|------|
| ATOM | 164 | C4'  | DA | 6 | 3.633  | 8.850 | -2.593 | 1.00 | 0.00 |
| ATOM | 165 | H4'  | DA | 6 | 3.496  | 9.412 | -1.669 | 1.00 | 0.00 |
| ATOM | 166 | O4'  | DA | 6 | 2.736  | 7.724 | -2.469 | 1.00 | 0.00 |
| ATOM | 167 | C1'  | DA | 6 | 3.447  | 6.758 | -1.700 | 1.00 | 0.00 |
| ATOM | 168 | H1'  | DA | 6 | 3.520  | 7.005 | -0.641 | 1.00 | 0.00 |
| ATOM | 169 | N9   | DA | 6 | 2.624  | 5.550 | -1.700 | 1.00 | 0.00 |
| ATOM | 170 | C8   | DA | 6 | 1.268  | 5.382 | -1.700 | 1.00 | 0.00 |
| ATOM | 171 | H8   | DA | 6 | 0.590  | 6.221 | -1.749 | 1.00 | 0.00 |
| ATOM | 172 | N7   | DA | 6 | 0.920  | 4.084 | -1.700 | 1.00 | 0.00 |
| ATOM | 173 | C5   | DA | 6 | 2.090  | 3.425 | -1.700 | 1.00 | 0.00 |
| ATOM | 174 | C6   | DA | 6 | 2.395  | 2.057 | -1.700 | 1.00 | 0.00 |
| ATOM | 175 | N6   | DA | 6 | 1.465  | 1.099 | -1.700 | 1.00 | 0.00 |
| ATOM | 176 | H61  | DA | 6 | 1.741  | 0.127 | -1.700 | 1.00 | 0.00 |
| ATOM | 177 | H62  | DA | 6 | 0.486  | 1.346 | -1.700 | 1.00 | 0.00 |
| ATOM | 178 | N1   | DA | 6 | 3.689  | 1.736 | -1.700 | 1.00 | 0.00 |
| ATOM | 179 | C2   | DA | 6 | 4.641  | 2.667 | -1.700 | 1.00 | 0.00 |
| ATOM | 180 | H2   | DA | 6 | 5.690  | 2.410 | -1.700 | 1.00 | 0.00 |
| ATOM | 181 | N3   | DA | 6 | 4.477  | 3.990 | -1.700 | 1.00 | 0.00 |
| ATOM | 182 | C4   | DA | 6 | 3.161  | 4.293 | -1.700 | 1.00 | 0.00 |
| ATOM | 183 | C3'  | DA | 6 | 5.018  | 8.219 | -2.707 | 1.00 | 0.00 |
| ATOM | 184 | H3'  | DA | 6 | 5.457  | 8.352 | -3.696 | 1.00 | 0.00 |
| ATOM | 185 | C2'  | DA | 6 | 4.765  | 6.736 | -2.458 | 1.00 | 0.00 |
| ATOM | 186 | H2'  | DA | 6 | 5.217  | 6.150 | -3.259 | 1.00 | 0.00 |
| ATOM | 187 | H2'' | DA | 6 | 5.206  | 6.447 | -1.504 | 1.00 | 0.00 |
| ATOM | 188 | O3'  | DA | 6 | 5.903  | 8.813 | -1.759 | 1.00 | 0.00 |
| ATOM | 189 | P    | DT | 7 | 7.386  | 8.253 | -1.569 | 1.00 | 0.00 |
| ATOM | 190 | OP1  | DT | 7 | 7.908  | 7.833 | -2.889 | 1.00 | 0.00 |
| ATOM | 191 | OP2  | DT | 7 | 8.190  | 9.249 | -0.831 | 1.00 | 0.00 |
| ATOM | 192 | O5'  | DT | 7 | 7.130  | 7.016 | -0.582 | 1.00 | 0.00 |
| ATOM | 193 | C5'  | DT | 7 | 8.232  | 6.147 | -0.370 | 1.00 | 0.00 |
| ATOM | 194 | H5'  | DT | 7 | 9.113  | 6.762 | -0.186 | 1.00 | 0.00 |
| ATOM | 195 | H5'' | DT | 7 | 8.387  | 5.533 | -1.257 | 1.00 | 0.00 |
| ATOM | 196 | C4'  | DT | 7 | 8.018  | 5.220 | 0.807  | 1.00 | 0.00 |
| ATOM | 197 | H4'  | DT | 7 | 8.223  | 5.760 | 1.731  | 1.00 | 0.00 |
| ATOM | 198 | O4'  | DT | 7 | 6.640  | 4.801 | 0.931  | 1.00 | 0.00 |
| ATOM | 199 | C1'  | DT | 7 | 6.676  | 3.603 | 1.700  | 1.00 | 0.00 |
| ATOM | 200 | H1'  | DT | 7 | 6.870  | 3.782 | 2.758  | 1.00 | 0.00 |
| ATOM | 201 | N1   | DT | 7 | 5.313  | 3.076 | 1.700  | 1.00 | 0.00 |
| ATOM | 202 | C6   | DT | 7 | 4.392  | 4.064 | 1.700  | 1.00 | 0.00 |
| ATOM | 203 | H6   | DT | 7 | 4.706  | 5.096 | 1.656  | 1.00 | 0.00 |
| ATOM | 204 | C5   | DT | 7 | 3.054  | 3.784 | 1.700  | 1.00 | 0.00 |
| ATOM | 205 | C7   | DT | 7 | 2.113  | 4.965 | 1.700  | 1.00 | 0.00 |
| ATOM | 206 | H71  | DT | 7 | 2.288  | 5.570 | 0.810  | 1.00 | 0.00 |
| ATOM | 207 | H72  | DT | 7 | 1.083  | 4.609 | 1.700  | 1.00 | 0.00 |
| ATOM | 208 | H73  | DT | 7 | 2.288  | 5.570 | 2.590  | 1.00 | 0.00 |
| ATOM | 209 | C4   | DT | 7 | 2.638  | 2.459 | 1.700  | 1.00 | 0.00 |
| ATOM | 210 | O4   | DT | 7 | 1.467  | 2.104 | 1.700  | 1.00 | 0.00 |
| ATOM | 211 | N3   | DT | 7 | 3.614  | 1.531 | 1.700  | 1.00 | 0.00 |
| ATOM | 212 | H3   | DT | 7 | 3.316  | 0.483 | 1.700  | 1.00 | 0.00 |
| ATOM | 213 | C2   | DT | 7 | 4.927  | 1.784 | 1.700  | 1.00 | 0.00 |
| ATOM | 214 | O2   | DT | 7 | 5.747  | 0.872 | 1.700  | 1.00 | 0.00 |
| ATOM | 215 | C3'  | DT | 7 | 8.799  | 3.913 | 0.693  | 1.00 | 0.00 |
| ATOM | 216 | H3'  | DT | 7 | 9.236  | 3.773 | -0.296 | 1.00 | 0.00 |
| ATOM | 217 | C2'  | DT | 7 | 7.748  | 2.836 | 0.942  | 1.00 | 0.00 |
| ATOM | 218 | H2'  | DT | 7 | 7.787  | 2.097 | 0.141  | 1.00 | 0.00 |
| ATOM | 219 | H2'' | DT | 7 | 7.946  | 2.348 | 1.896  | 1.00 | 0.00 |
| ATOM | 220 | O3'  | DT | 7 | 9.865  | 3.899 | 1.641  | 1.00 | 0.00 |
| ATOM | 221 | P    | DT | 8 | 10.767 | 2.596 | 1.831  | 1.00 | 0.00 |
| ATOM | 222 | OP1  | DT | 8 | 10.958 | 1.954 | 0.511  | 1.00 | 0.00 |
| ATOM | 223 | OP2  | DT | 8 | 11.995 | 2.959 | 2.569  | 1.00 | 0.00 |

|      |     |      |    |    |        |        |       |      |      |
|------|-----|------|----|----|--------|--------|-------|------|------|
| ATOM | 224 | O5'  | DT | 8  | 9.853  | 1.723  | 2.818 | 1.00 | 0.00 |
| ATOM | 225 | C5'  | DT | 8  | 10.267 | 0.382  | 3.030 | 1.00 | 0.00 |
| ATOM | 226 | H5'  | DT | 8  | 11.341 | 0.390  | 3.216 | 1.00 | 0.00 |
| ATOM | 227 | H5'' | DT | 8  | 10.047 | -0.211 | 2.142 | 1.00 | 0.00 |
| ATOM | 228 | C4'  | DT | 8  | 9.563  | -0.260 | 4.207 | 1.00 | 0.00 |
| ATOM | 229 | H4'  | DT | 8  | 10.039 | 0.068  | 5.131 | 1.00 | 0.00 |
| ATOM | 230 | O4'  | DT | 8  | 8.192  | 0.179  | 4.331 | 1.00 | 0.00 |
| ATOM | 231 | C1'  | DT | 8  | 7.541  | -0.827 | 5.100 | 1.00 | 0.00 |
| ATOM | 232 | H1'  | DT | 8  | 7.802  | -0.790 | 6.158 | 1.00 | 0.00 |
| ATOM | 233 | N1   | DT | 8  | 6.120  | -0.487 | 5.100 | 1.00 | 0.00 |
| ATOM | 234 | C6   | DT | 8  | 5.923  | 0.849  | 5.100 | 1.00 | 0.00 |
| ATOM | 235 | H6   | DT | 8  | 6.768  | 1.520  | 5.056 | 1.00 | 0.00 |
| ATOM | 236 | C5   | DT | 8  | 4.663  | 1.379  | 5.100 | 1.00 | 0.00 |
| ATOM | 237 | C7   | DT | 8  | 4.560  | 2.885  | 5.100 | 1.00 | 0.00 |
| ATOM | 238 | H71  | DT | 8  | 5.048  | 3.283  | 4.210 | 1.00 | 0.00 |
| ATOM | 239 | H72  | DT | 8  | 3.510  | 3.178  | 5.100 | 1.00 | 0.00 |
| ATOM | 240 | H73  | DT | 8  | 5.048  | 3.283  | 5.990 | 1.00 | 0.00 |
| ATOM | 241 | C4   | DT | 8  | 3.569  | 0.525  | 5.100 | 1.00 | 0.00 |
| ATOM | 242 | O4   | DT | 8  | 2.403  | 0.898  | 5.100 | 1.00 | 0.00 |
| ATOM | 243 | N3   | DT | 8  | 3.844  | -0.793 | 5.100 | 1.00 | 0.00 |
| ATOM | 244 | H3   | DT | 8  | 3.003  | -1.486 | 5.100 | 1.00 | 0.00 |
| ATOM | 245 | C2   | DT | 8  | 5.068  | -1.331 | 5.100 | 1.00 | 0.00 |
| ATOM | 246 | O2   | DT | 8  | 5.225  | -2.548 | 5.100 | 1.00 | 0.00 |
| ATOM | 247 | C3'  | DT | 8  | 9.464  | -1.779 | 4.093 | 1.00 | 0.00 |
| ATOM | 248 | H3'  | DT | 8  | 9.744  | -2.143 | 3.104 | 1.00 | 0.00 |
| ATOM | 249 | C2'  | DT | 8  | 7.988  | -2.068 | 4.342 | 1.00 | 0.00 |
| ATOM | 250 | H2'  | DT | 8  | 7.601  | -2.698 | 3.542 | 1.00 | 0.00 |
| ATOM | 251 | H2'' | DT | 8  | 7.874  | -2.582 | 5.296 | 1.00 | 0.00 |
| ATOM | 252 | O3'  | DT | 8  | 10.333 | -2.396 | 5.041 | 1.00 | 0.00 |
| ATOM | 253 | P    | DC | 9  | 10.335 | -3.981 | 5.231 | 1.00 | 0.00 |
| ATOM | 254 | OP1  | DC | 9  | 10.128 | -4.618 | 3.911 | 1.00 | 0.00 |
| ATOM | 255 | OP2  | DC | 9  | 11.552 | -4.380 | 5.969 | 1.00 | 0.00 |
| ATOM | 256 | O5'  | DC | 9  | 9.088  | -4.180 | 6.218 | 1.00 | 0.00 |
| ATOM | 257 | C5'  | DC | 9  | 8.666  | -5.518 | 6.430 | 1.00 | 0.00 |
| ATOM | 258 | H5'  | DC | 9  | 9.554  | -6.123 | 6.614 | 1.00 | 0.00 |
| ATOM | 259 | H5'' | DC | 9  | 8.147  | -5.881 | 5.543 | 1.00 | 0.00 |
| ATOM | 260 | C4'  | DC | 9  | 7.723  | -5.647 | 7.607 | 1.00 | 0.00 |
| ATOM | 261 | H4'  | DC | 9  | 8.301  | -5.647 | 8.531 | 1.00 | 0.00 |
| ATOM | 262 | O4'  | DC | 9  | 6.843  | -4.507 | 7.731 | 1.00 | 0.00 |
| ATOM | 263 | C1'  | DC | 9  | 5.735  | -4.965 | 8.500 | 1.00 | 0.00 |
| ATOM | 264 | H1'  | DC | 9  | 6.017  | -5.058 | 9.549 | 1.00 | 0.00 |
| ATOM | 265 | N1   | DC | 9  | 4.760  | -3.877 | 8.500 | 1.00 | 0.00 |
| ATOM | 266 | C6   | DC | 9  | 5.245  | -2.599 | 8.500 | 1.00 | 0.00 |
| ATOM | 267 | H6   | DC | 9  | 6.310  | -2.418 | 8.500 | 1.00 | 0.00 |
| ATOM | 268 | C5   | DC | 9  | 4.386  | -1.524 | 8.500 | 1.00 | 0.00 |
| ATOM | 269 | H5   | DC | 9  | 4.770  | -0.504 | 8.500 | 1.00 | 0.00 |
| ATOM | 270 | C4   | DC | 9  | 3.041  | -1.822 | 8.500 | 1.00 | 0.00 |
| ATOM | 271 | N4   | DC | 9  | 2.134  | -0.855 | 8.500 | 1.00 | 0.00 |
| ATOM | 272 | H41  | DC | 9  | 1.161  | -1.124 | 8.500 | 1.00 | 0.00 |
| ATOM | 273 | H42  | DC | 9  | 2.422  | 0.113  | 8.500 | 1.00 | 0.00 |
| ATOM | 274 | N3   | DC | 9  | 2.584  | -3.102 | 8.500 | 1.00 | 0.00 |
| ATOM | 275 | C2   | DC | 9  | 3.443  | -4.152 | 8.500 | 1.00 | 0.00 |
| ATOM | 276 | O2   | DC | 9  | 3.041  | -5.310 | 8.500 | 1.00 | 0.00 |
| ATOM | 277 | C3'  | DC | 9  | 6.778  | -6.841 | 7.493 | 1.00 | 0.00 |
| ATOM | 278 | H3'  | DC | 9  | 6.801  | -7.300 | 6.504 | 1.00 | 0.00 |
| ATOM | 279 | C2'  | DC | 9  | 5.399  | -6.240 | 7.742 | 1.00 | 0.00 |
| ATOM | 280 | H2'  | DC | 9  | 4.722  | -6.538 | 6.941 | 1.00 | 0.00 |
| ATOM | 281 | H2'' | DC | 9  | 5.013  | -6.599 | 8.696 | 1.00 | 0.00 |
| ATOM | 282 | O3'  | DC | 9  | 7.142  | -7.842 | 8.441 | 1.00 | 0.00 |
| ATOM | 283 | P    | DG | 10 | 6.243  | -9.148 | 8.631 | 1.00 | 0.00 |

|      |     |      |    |    |        |         |        |      |      |
|------|-----|------|----|----|--------|---------|--------|------|------|
| ATOM | 284 | OP1  | DG | 10 | 5.711  | -9.554  | 7.311  | 1.00 | 0.00 |
| ATOM | 285 | OP2  | DG | 10 | 7.018  | -10.167 | 9.369  | 1.00 | 0.00 |
| ATOM | 286 | O5'  | DG | 10 | 5.104  | -8.603  | 9.618  | 1.00 | 0.00 |
| ATOM | 287 | C5'  | DG | 10 | 3.997  | -9.465  | 9.830  | 1.00 | 0.00 |
| ATOM | 288 | H5'  | DG | 10 | 4.384  | -10.467 | 10.015 | 1.00 | 0.00 |
| ATOM | 289 | H5'' | DG | 10 | 3.364  | -9.470  | 8.942  | 1.00 | 0.00 |
| ATOM | 290 | C4'  | DG | 10 | 3.147  | -9.035  | 11.007 | 1.00 | 0.00 |
| ATOM | 291 | H4'  | DG | 10 | 3.622  | -9.364  | 11.931 | 1.00 | 0.00 |
| ATOM | 292 | O4'  | DG | 10 | 3.071  | -7.597  | 11.131 | 1.00 | 0.00 |
| ATOM | 293 | C1'  | DG | 10 | 1.899  | -7.344  | 11.900 | 1.00 | 0.00 |
| ATOM | 294 | H1'  | DG | 10 | 2.077  | -7.581  | 12.949 | 1.00 | 0.00 |
| ATOM | 295 | N9   | DG | 10 | 1.714  | -5.895  | 11.900 | 1.00 | 0.00 |
| ATOM | 296 | C8   | DG | 10 | 2.707  | -4.942  | 11.900 | 1.00 | 0.00 |
| ATOM | 297 | H8   | DG | 10 | 3.755  | -5.201  | 11.902 | 1.00 | 0.00 |
| ATOM | 298 | N7   | DG | 10 | 2.202  | -3.700  | 11.900 | 1.00 | 0.00 |
| ATOM | 299 | C5   | DG | 10 | 0.870  | -3.906  | 11.900 | 1.00 | 0.00 |
| ATOM | 300 | C6   | DG | 10 | -0.187 | -2.983  | 11.900 | 1.00 | 0.00 |
| ATOM | 301 | O6   | DG | 10 | -0.126 | -1.751  | 11.900 | 1.00 | 0.00 |
| ATOM | 302 | N1   | DG | 10 | -1.410 | -3.608  | 11.900 | 1.00 | 0.00 |
| ATOM | 303 | H1   | DG | 10 | -2.203 | -2.998  | 11.900 | 1.00 | 0.00 |
| ATOM | 304 | C2   | DG | 10 | -1.650 | -4.948  | 11.900 | 1.00 | 0.00 |
| ATOM | 305 | N2   | DG | 10 | -2.921 | -5.360  | 11.900 | 1.00 | 0.00 |
| ATOM | 306 | H21  | DG | 10 | -3.748 | -4.780  | 11.912 | 1.00 | 0.00 |
| ATOM | 307 | H22  | DG | 10 | -3.072 | -6.359  | 11.909 | 1.00 | 0.00 |
| ATOM | 308 | N3   | DG | 10 | -0.654 | -5.830  | 11.900 | 1.00 | 0.00 |
| ATOM | 309 | C4   | DG | 10 | 0.549  | -5.243  | 11.900 | 1.00 | 0.00 |
| ATOM | 310 | C3'  | DG | 10 | 1.691  | -9.480  | 10.893 | 1.00 | 0.00 |
| ATOM | 311 | H3'  | DG | 10 | 1.450  | -9.871  | 9.904  | 1.00 | 0.00 |
| ATOM | 312 | C2'  | DG | 10 | 0.898  | -8.202  | 11.142 | 1.00 | 0.00 |
| ATOM | 313 | H2'  | DG | 10 | 0.172  | -8.063  | 10.341 | 1.00 | 0.00 |
| ATOM | 314 | H2'' | DG | 10 | 0.376  | -8.278  | 12.096 | 1.00 | 0.00 |
| ATOM | 315 | O3'  | DG | 10 | 1.422  | -10.511 | 11.841 | 1.00 | 0.00 |
| ATOM | 316 | P    | DC | 11 | -0.059 | -11.075 | 12.031 | 1.00 | 0.00 |
| ATOM | 317 | OP1  | DC | 11 | -0.728 | -11.107 | 10.711 | 1.00 | 0.00 |
| ATOM | 318 | OP2  | DC | 11 | -0.001 | -12.354 | 12.769 | 1.00 | 0.00 |
| ATOM | 319 | O5'  | DC | 11 | -0.687 | -9.979  | 13.018 | 1.00 | 0.00 |
| ATOM | 320 | C5'  | DC | 11 | -2.088 | -10.060 | 13.230 | 1.00 | 0.00 |
| ATOM | 321 | H5'  | DC | 11 | -2.338 | -11.105 | 13.415 | 1.00 | 0.00 |
| ATOM | 322 | H5'' | DC | 11 | -2.611 | -9.705  | 12.342 | 1.00 | 0.00 |
| ATOM | 323 | C4'  | DC | 11 | -2.543 | -9.223  | 14.407 | 1.00 | 0.00 |
| ATOM | 324 | H4'  | DC | 11 | -2.338 | -9.764  | 15.331 | 1.00 | 0.00 |
| ATOM | 325 | O4'  | DC | 11 | -1.789 | -7.996  | 14.531 | 1.00 | 0.00 |
| ATOM | 326 | C1'  | DC | 11 | -2.610 | -7.123  | 15.300 | 1.00 | 0.00 |
| ATOM | 327 | H1'  | DC | 11 | -2.596 | -7.420  | 16.349 | 1.00 | 0.00 |
| ATOM | 328 | N1   | DC | 11 | -1.938 | -5.825  | 15.300 | 1.00 | 0.00 |
| ATOM | 329 | C6   | DC | 11 | -0.571 | -5.826  | 15.300 | 1.00 | 0.00 |
| ATOM | 330 | H6   | DC | 11 | -0.024 | -6.757  | 15.300 | 1.00 | 0.00 |
| ATOM | 331 | C5   | DC | 11 | 0.129  | -4.641  | 15.300 | 1.00 | 0.00 |
| ATOM | 332 | H5   | DC | 11 | 1.219  | -4.638  | 15.300 | 1.00 | 0.00 |
| ATOM | 333 | C4   | DC | 11 | -0.626 | -3.489  | 15.300 | 1.00 | 0.00 |
| ATOM | 334 | N4   | DC | 11 | -0.043 | -2.299  | 15.300 | 1.00 | 0.00 |
| ATOM | 335 | H41  | DC | 11 | -0.639 | -1.484  | 15.300 | 1.00 | 0.00 |
| ATOM | 336 | H42  | DC | 11 | 0.964  | -2.226  | 15.300 | 1.00 | 0.00 |
| ATOM | 337 | N3   | DC | 11 | -1.985 | -3.515  | 15.300 | 1.00 | 0.00 |
| ATOM | 338 | C2   | DC | 11 | -2.662 | -4.691  | 15.300 | 1.00 | 0.00 |
| ATOM | 339 | O2   | DC | 11 | -3.887 | -4.726  | 15.300 | 1.00 | 0.00 |
| ATOM | 340 | C3'  | DC | 11 | -3.994 | -8.763  | 14.293 | 1.00 | 0.00 |
| ATOM | 341 | H3'  | DC | 11 | -4.414 | -8.947  | 13.304 | 1.00 | 0.00 |
| ATOM | 342 | C2'  | DC | 11 | -3.921 | -7.260  | 14.542 | 1.00 | 0.00 |
| ATOM | 343 | H2'  | DC | 11 | -4.440 | -6.733  | 13.742 | 1.00 | 0.00 |

|      |     |        |     |    |        |         |        |      |      |
|------|-----|--------|-----|----|--------|---------|--------|------|------|
| ATOM | 344 | H2 ' ' | DC  | 11 | -4.393 | -7.026  | 15.496 | 1.00 | 0.00 |
| ATOM | 345 | O3'    | DC  | 11 | -4.802 | -9.458  | 15.241 | 1.00 | 0.00 |
| ATOM | 346 | P      | DG3 | 12 | -6.341 | -9.080  | 15.431 | 1.00 | 0.00 |
| ATOM | 347 | OP1    | DG3 | 12 | -6.910 | -8.727  | 14.111 | 1.00 | 0.00 |
| ATOM | 348 | OP2    | DG3 | 12 | -7.019 | -10.166 | 16.169 | 1.00 | 0.00 |
| ATOM | 349 | O5'    | DG3 | 12 | -6.235 | -7.822  | 16.418 | 1.00 | 0.00 |
| ATOM | 350 | C5'    | DG3 | 12 | -7.434 | -7.092  | 16.630 | 1.00 | 0.00 |
| ATOM | 351 | H5'    | DG3 | 12 | -8.234 | -7.809  | 16.815 | 1.00 | 0.00 |
| ATOM | 352 | H5 ' ' | DG3 | 12 | -7.662 | -6.502  | 15.742 | 1.00 | 0.00 |
| ATOM | 353 | C4'    | DG3 | 12 | -7.333 | -6.145  | 17.807 | 1.00 | 0.00 |
| ATOM | 354 | H4'    | DG3 | 12 | -7.472 | -6.706  | 18.731 | 1.00 | 0.00 |
| ATOM | 355 | O4'    | DG3 | 12 | -6.015 | -5.564  | 17.931 | 1.00 | 0.00 |
| ATOM | 356 | C1'    | DG3 | 12 | -6.194 | -4.379  | 18.700 | 1.00 | 0.00 |
| ATOM | 357 | H1'    | DG3 | 12 | -6.352 | -4.630  | 19.749 | 1.00 | 0.00 |
| ATOM | 358 | N9     | DG3 | 12 | -4.905 | -3.692  | 18.700 | 1.00 | 0.00 |
| ATOM | 359 | C8     | DG3 | 12 | -3.662 | -4.283  | 18.700 | 1.00 | 0.00 |
| ATOM | 360 | H8     | DG3 | 12 | -3.533 | -5.355  | 18.702 | 1.00 | 0.00 |
| ATOM | 361 | N7     | DG3 | 12 | -2.679 | -3.371  | 18.700 | 1.00 | 0.00 |
| ATOM | 362 | C5     | DG3 | 12 | -3.344 | -2.198  | 18.700 | 1.00 | 0.00 |
| ATOM | 363 | C6     | DG3 | 12 | -2.856 | -0.883  | 18.700 | 1.00 | 0.00 |
| ATOM | 364 | O6     | DG3 | 12 | -1.682 | -0.503  | 18.700 | 1.00 | 0.00 |
| ATOM | 365 | N1     | DG3 | 12 | -3.874 | 0.039   | 18.700 | 1.00 | 0.00 |
| ATOM | 366 | H1     | DG3 | 12 | -3.585 | 0.996   | 18.700 | 1.00 | 0.00 |
| ATOM | 367 | C2     | DG3 | 12 | -5.212 | -0.211  | 18.700 | 1.00 | 0.00 |
| ATOM | 368 | N2     | DG3 | 12 | -6.047 | 0.831   | 18.700 | 1.00 | 0.00 |
| ATOM | 369 | H21    | DG3 | 12 | -5.798 | 1.810   | 18.712 | 1.00 | 0.00 |
| ATOM | 370 | H22    | DG3 | 12 | -7.034 | 0.618   | 18.709 | 1.00 | 0.00 |
| ATOM | 371 | N3     | DG3 | 12 | -5.684 | -1.455  | 18.700 | 1.00 | 0.00 |
| ATOM | 372 | C4     | DG3 | 12 | -4.708 | -2.372  | 18.700 | 1.00 | 0.00 |
| ATOM | 373 | C3'    | DG3 | 12 | -8.265 | -4.942  | 17.693 | 1.00 | 0.00 |
| ATOM | 374 | H3'    | DG3 | 12 | -8.715 | -4.855  | 16.704 | 1.00 | 0.00 |
| ATOM | 375 | C2'    | DG3 | 12 | -7.351 | -3.747  | 17.942 | 1.00 | 0.00 |
| ATOM | 376 | H2'    | DG3 | 12 | -7.479 | -3.018  | 17.142 | 1.00 | 0.00 |
| ATOM | 377 | H2 ' ' | DG3 | 12 | -7.606 | -3.286  | 18.896 | 1.00 | 0.00 |
| ATOM | 378 | O3'    | DG3 | 12 | -9.325 | -5.055  | 18.641 | 1.00 | 0.00 |
| ATOM | 379 | HO3'   | DG3 | 12 | -9.957 | -4.332  | 18.631 | 1.00 | 0.00 |
| TER  |     |        |     |    |        |         |        |      |      |
| ATOM | 380 | HO5'   | DC5 | 13 | -2.787 | 10.101  | 21.706 | 1.00 | 0.00 |
| ATOM | 381 | O5'    | DC5 | 13 | -3.048 | 9.527   | 20.982 | 1.00 | 0.00 |
| ATOM | 382 | C5'    | DC5 | 13 | -4.428 | 9.271   | 20.770 | 1.00 | 0.00 |
| ATOM | 383 | H5'    | DC5 | 13 | -4.920 | 10.226  | 20.585 | 1.00 | 0.00 |
| ATOM | 384 | H5 ' ' | DC5 | 13 | -4.842 | 8.818   | 21.671 | 1.00 | 0.00 |
| ATOM | 385 | C4'    | DC5 | 13 | -4.670 | 8.350   | 19.593 | 1.00 | 0.00 |
| ATOM | 386 | H4'    | DC5 | 13 | -4.601 | 8.924   | 18.669 | 1.00 | 0.00 |
| ATOM | 387 | O4'    | DC5 | 13 | -3.644 | 7.339   | 19.469 | 1.00 | 0.00 |
| ATOM | 388 | C1'    | DC5 | 13 | -4.233 | 6.295   | 18.700 | 1.00 | 0.00 |
| ATOM | 389 | H1'    | DC5 | 13 | -4.290 | 6.587   | 17.651 | 1.00 | 0.00 |
| ATOM | 390 | N1     | DC5 | 13 | -3.272 | 5.194   | 18.700 | 1.00 | 0.00 |
| ATOM | 391 | C6     | DC5 | 13 | -1.944 | 5.522   | 18.700 | 1.00 | 0.00 |
| ATOM | 392 | H6     | DC5 | 13 | -1.635 | 6.557   | 18.700 | 1.00 | 0.00 |
| ATOM | 393 | C5     | DC5 | 13 | -0.982 | 4.538   | 18.700 | 1.00 | 0.00 |
| ATOM | 394 | H5     | DC5 | 13 | 0.077  | 4.796   | 18.700 | 1.00 | 0.00 |
| ATOM | 395 | C4     | DC5 | 13 | -1.440 | 3.239   | 18.700 | 1.00 | 0.00 |
| ATOM | 396 | N4     | DC5 | 13 | -0.590 | 2.222   | 18.700 | 1.00 | 0.00 |
| ATOM | 397 | H41    | DC5 | 13 | -0.975 | 1.288   | 18.700 | 1.00 | 0.00 |
| ATOM | 398 | H42    | DC5 | 13 | 0.406  | 2.391   | 18.700 | 1.00 | 0.00 |
| ATOM | 399 | N3     | DC5 | 13 | -2.766 | 2.941   | 18.700 | 1.00 | 0.00 |
| ATOM | 400 | C2     | DC5 | 13 | -3.704 | 3.921   | 18.700 | 1.00 | 0.00 |
| ATOM | 401 | O2     | DC5 | 13 | -4.902 | 3.662   | 18.700 | 1.00 | 0.00 |
| ATOM | 402 | C3'    | DC5 | 13 | -5.969 | 7.557   | 19.707 | 1.00 | 0.00 |

|      |     |      |     |    |         |        |        |      |      |
|------|-----|------|-----|----|---------|--------|--------|------|------|
| ATOM | 403 | H3'  | DC5 | 13 | -6.421  | 7.636  | 20.696 | 1.00 | 0.00 |
| ATOM | 404 | C2'  | DC5 | 13 | -5.540  | 6.115  | 19.458 | 1.00 | 0.00 |
| ATOM | 405 | H2'  | DC5 | 13 | -5.919  | 5.479  | 20.258 | 1.00 | 0.00 |
| ATOM | 406 | H2'' | DC5 | 13 | -5.942  | 5.775  | 18.504 | 1.00 | 0.00 |
| ATOM | 407 | O3'  | DC5 | 13 | -6.919  | 8.040  | 18.759 | 1.00 | 0.00 |
| ATOM | 408 | P    | DG  | 14 | -8.324  | 7.306  | 18.569 | 1.00 | 0.00 |
| ATOM | 409 | OP1  | DG  | 14 | -8.792  | 6.827  | 19.889 | 1.00 | 0.00 |
| ATOM | 410 | OP2  | DG  | 14 | -9.242  | 8.198  | 17.831 | 1.00 | 0.00 |
| ATOM | 411 | O5'  | DG  | 14 | -7.921  | 6.109  | 17.582 | 1.00 | 0.00 |
| ATOM | 412 | C5'  | DG  | 14 | -8.911  | 5.114  | 17.370 | 1.00 | 0.00 |
| ATOM | 413 | H5'  | DG  | 14 | -9.858  | 5.621  | 17.185 | 1.00 | 0.00 |
| ATOM | 414 | H5'' | DG  | 14 | -8.992  | 4.487  | 18.258 | 1.00 | 0.00 |
| ATOM | 415 | C4'  | DG  | 14 | -8.587  | 4.218  | 16.193 | 1.00 | 0.00 |
| ATOM | 416 | H4'  | DG  | 14 | -8.856  | 4.730  | 15.269 | 1.00 | 0.00 |
| ATOM | 417 | O4'  | DG  | 14 | -7.169  | 3.969  | 16.069 | 1.00 | 0.00 |
| ATOM | 418 | C1'  | DG  | 14 | -7.060  | 2.775  | 15.300 | 1.00 | 0.00 |
| ATOM | 419 | H1'  | DG  | 14 | -7.274  | 2.981  | 14.251 | 1.00 | 0.00 |
| ATOM | 420 | N9   | DG  | 14 | -5.644  | 2.416  | 15.300 | 1.00 | 0.00 |
| ATOM | 421 | C8   | DG  | 14 | -4.578  | 3.286  | 15.300 | 1.00 | 0.00 |
| ATOM | 422 | H8   | DG  | 14 | -4.708  | 4.358  | 15.298 | 1.00 | 0.00 |
| ATOM | 423 | N7   | DG  | 14 | -3.406  | 2.634  | 15.300 | 1.00 | 0.00 |
| ATOM | 424 | C5   | DG  | 14 | -3.772  | 1.337  | 15.300 | 1.00 | 0.00 |
| ATOM | 425 | C6   | DG  | 14 | -2.984  | 0.176  | 15.300 | 1.00 | 0.00 |
| ATOM | 426 | O6   | DG  | 14 | -1.754  | 0.087  | 15.300 | 1.00 | 0.00 |
| ATOM | 427 | N1   | DG  | 14 | -3.753  | -0.962 | 15.300 | 1.00 | 0.00 |
| ATOM | 428 | H1   | DG  | 14 | -3.244  | -1.823 | 15.300 | 1.00 | 0.00 |
| ATOM | 429 | C2   | DG  | 14 | -5.112  | -1.038 | 15.300 | 1.00 | 0.00 |
| ATOM | 430 | N2   | DG  | 14 | -5.674  | -2.250 | 15.300 | 1.00 | 0.00 |
| ATOM | 431 | H21  | DG  | 14 | -5.198  | -3.141 | 15.288 | 1.00 | 0.00 |
| ATOM | 432 | H22  | DG  | 14 | -6.684  | -2.279 | 15.291 | 1.00 | 0.00 |
| ATOM | 433 | N3   | DG  | 14 | -5.867  | 0.058  | 15.300 | 1.00 | 0.00 |
| ATOM | 434 | C4   | DG  | 14 | -5.138  | 1.180  | 15.300 | 1.00 | 0.00 |
| ATOM | 435 | C3'  | DG  | 14 | -9.206  | 2.828  | 16.307 | 1.00 | 0.00 |
| ATOM | 436 | H3'  | DG  | 14 | -9.623  | 2.636  | 17.296 | 1.00 | 0.00 |
| ATOM | 437 | C2'  | DG  | 14 | -8.033  | 1.885  | 16.058 | 1.00 | 0.00 |
| ATOM | 438 | H2'  | DG  | 14 | -7.983  | 1.147  | 16.859 | 1.00 | 0.00 |
| ATOM | 439 | H2'' | DG  | 14 | -8.171  | 1.377  | 15.104 | 1.00 | 0.00 |
| ATOM | 440 | O3'  | DG  | 14 | -10.261 | 2.685  | 15.359 | 1.00 | 0.00 |
| ATOM | 441 | P    | DC  | 15 | -11.000 | 1.283  | 15.169 | 1.00 | 0.00 |
| ATOM | 442 | OP1  | DC  | 15 | -11.114 | 0.623  | 16.489 | 1.00 | 0.00 |
| ATOM | 443 | OP2  | DC  | 15 | -12.263 | 1.496  | 14.431 | 1.00 | 0.00 |
| ATOM | 444 | O5'  | DC  | 15 | -9.989  | 0.527  | 14.182 | 1.00 | 0.00 |
| ATOM | 445 | C5'  | DC  | 15 | -10.238 | -0.854 | 13.970 | 1.00 | 0.00 |
| ATOM | 446 | H5'  | DC  | 15 | -11.305 | -0.976 | 13.786 | 1.00 | 0.00 |
| ATOM | 447 | H5'' | DC  | 15 | -9.948  | -1.416 | 14.857 | 1.00 | 0.00 |
| ATOM | 448 | C4'  | DC  | 15 | -9.463  | -1.407 | 12.793 | 1.00 | 0.00 |
| ATOM | 449 | H4'  | DC  | 15 | -9.975  | -1.139 | 11.869 | 1.00 | 0.00 |
| ATOM | 450 | O4'  | DC  | 15 | -8.154  | -0.807 | 12.669 | 1.00 | 0.00 |
| ATOM | 451 | C1'  | DC  | 15 | -7.387  | -1.727 | 11.900 | 1.00 | 0.00 |
| ATOM | 452 | H1'  | DC  | 15 | -7.680  | -1.677 | 10.851 | 1.00 | 0.00 |
| ATOM | 453 | N1   | DC  | 15 | -6.017  | -1.218 | 11.900 | 1.00 | 0.00 |
| ATOM | 454 | C6   | DC  | 15 | -5.852  | 0.139  | 11.900 | 1.00 | 0.00 |
| ATOM | 455 | H6   | DC  | 15 | -6.710  | 0.794  | 11.900 | 1.00 | 0.00 |
| ATOM | 456 | C5   | DC  | 15 | -4.591  | 0.691  | 11.900 | 1.00 | 0.00 |
| ATOM | 457 | H5   | DC  | 15 | -4.456  | 1.773  | 11.900 | 1.00 | 0.00 |
| ATOM | 458 | C4   | DC  | 15 | -3.539  | -0.198 | 11.900 | 1.00 | 0.00 |
| ATOM | 459 | N4   | DC  | 15 | -2.287  | 0.236  | 11.900 | 1.00 | 0.00 |
| ATOM | 460 | H41  | DC  | 15 | -1.551  | -0.455 | 11.900 | 1.00 | 0.00 |
| ATOM | 461 | H42  | DC  | 15 | -2.092  | 1.227  | 11.900 | 1.00 | 0.00 |
| ATOM | 462 | N3   | DC  | 15 | -3.730  | -1.544 | 11.900 | 1.00 | 0.00 |



|      |     |      |    |    |         |         |        |      |      |
|------|-----|------|----|----|---------|---------|--------|------|------|
| ATOM | 463 | C2   | DC | 15 | -4.979  | -2.074  | 11.900 | 1.00 | 0.00 |
| ATOM | 464 | O2   | DC | 15 | -5.162  | -3.286  | 11.900 | 1.00 | 0.00 |
| ATOM | 465 | C3'  | DC | 15 | -9.182  | -2.903  | 12.907 | 1.00 | 0.00 |
| ATOM | 466 | H3'  | DC | 15 | -9.416  | -3.298  | 13.896 | 1.00 | 0.00 |
| ATOM | 467 | C2'  | DC | 15 | -7.681  | -3.012  | 12.658 | 1.00 | 0.00 |
| ATOM | 468 | H2'  | DC | 15 | -7.220  | -3.591  | 13.459 | 1.00 | 0.00 |
| ATOM | 469 | H2'' | DC | 15 | -7.506  | -3.509  | 11.704 | 1.00 | 0.00 |
| ATOM | 470 | O3'  | DC | 15 | -9.970  | -3.620  | 11.959 | 1.00 | 0.00 |
| ATOM | 471 | P    | DG | 16 | -9.782  | -5.194  | 11.769 | 1.00 | 0.00 |
| ATOM | 472 | OP1  | DG | 16 | -9.500  | -5.801  | 13.089 | 1.00 | 0.00 |
| ATOM | 473 | OP2  | DG | 16 | -10.942 | -5.736  | 11.031 | 1.00 | 0.00 |
| ATOM | 474 | O5'  | DG | 16 | -8.520  | -5.242  | 10.782 | 1.00 | 0.00 |
| ATOM | 475 | C5'  | DG | 16 | -7.940  | -6.520  | 10.570 | 1.00 | 0.00 |
| ATOM | 476 | H5'  | DG | 16 | -8.749  | -7.227  | 10.385 | 1.00 | 0.00 |
| ATOM | 477 | H5'' | DG | 16 | -7.382  | -6.818  | 11.457 | 1.00 | 0.00 |
| ATOM | 478 | C4'  | DG | 16 | -6.988  | -6.534  | 9.393  | 1.00 | 0.00 |
| ATOM | 479 | H4'  | DG | 16 | -7.562  | -6.604  | 8.469  | 1.00 | 0.00 |
| ATOM | 480 | O4'  | DG | 16 | -6.252  | -5.296  | 9.269  | 1.00 | 0.00 |
| ATOM | 481 | C1'  | DG | 16 | -5.097  | -5.618  | 8.500  | 1.00 | 0.00 |
| ATOM | 482 | H1'  | DG | 16 | -5.365  | -5.745  | 7.451  | 1.00 | 0.00 |
| ATOM | 483 | N9   | DG | 16 | -4.259  | -4.421  | 8.500  | 1.00 | 0.00 |
| ATOM | 484 | C8   | DG | 16 | -4.695  | -3.116  | 8.500  | 1.00 | 0.00 |
| ATOM | 485 | H8   | DG | 16 | -5.744  | -2.858  | 8.498  | 1.00 | 0.00 |
| ATOM | 486 | N7   | DG | 16 | -3.671  | -2.251  | 8.500  | 1.00 | 0.00 |
| ATOM | 487 | C5   | DG | 16 | -2.587  | -3.053  | 8.500  | 1.00 | 0.00 |
| ATOM | 488 | C6   | DG | 16 | -1.222  | -2.728  | 8.500  | 1.00 | 0.00 |
| ATOM | 489 | O6   | DG | 16 | -0.703  | -1.609  | 8.500  | 1.00 | 0.00 |
| ATOM | 490 | N1   | DG | 16 | -0.431  | -3.850  | 8.500  | 1.00 | 0.00 |
| ATOM | 491 | H1   | DG | 16 | 0.554   | -3.679  | 8.500  | 1.00 | 0.00 |
| ATOM | 492 | C2   | DG | 16 | -0.841  | -5.148  | 8.500  | 1.00 | 0.00 |
| ATOM | 493 | N2   | DG | 16 | 0.093   | -6.103  | 8.500  | 1.00 | 0.00 |
| ATOM | 494 | H21  | DG | 16 | 1.095   | -5.974  | 8.488  | 1.00 | 0.00 |
| ATOM | 495 | H22  | DG | 16 | -0.238  | -7.057  | 8.491  | 1.00 | 0.00 |
| ATOM | 496 | N3   | DG | 16 | -2.133  | -5.465  | 8.500  | 1.00 | 0.00 |
| ATOM | 497 | C4   | DG | 16 | -2.925  | -4.386  | 8.500  | 1.00 | 0.00 |
| ATOM | 498 | C3'  | DG | 16 | -5.907  | -7.606  | 9.507  | 1.00 | 0.00 |
| ATOM | 499 | H3'  | DG | 16 | -5.875  | -8.064  | 10.495 | 1.00 | 0.00 |
| ATOM | 500 | C2'  | DG | 16 | -4.610  | -6.843  | 9.258  | 1.00 | 0.00 |
| ATOM | 501 | H2'  | DG | 16 | -3.902  | -7.057  | 10.059 | 1.00 | 0.00 |
| ATOM | 502 | H2'' | DG | 16 | -4.183  | -7.153  | 8.304  | 1.00 | 0.00 |
| ATOM | 503 | O3'  | DG | 16 | -6.148  | -8.643  | 8.559  | 1.00 | 0.00 |
| ATOM | 504 | P    | DA | 17 | -5.099  | -9.831  | 8.369  | 1.00 | 0.00 |
| ATOM | 505 | OP1  | DA | 17 | -4.522  | -10.171 | 9.689  | 1.00 | 0.00 |
| ATOM | 506 | OP2  | DA | 17 | -5.746  | -10.937 | 7.631  | 1.00 | 0.00 |
| ATOM | 507 | O5'  | DA | 17 | -4.033  | -9.154  | 7.382  | 1.00 | 0.00 |
| ATOM | 508 | C5'  | DA | 17 | -2.831  | -9.876  | 7.170  | 1.00 | 0.00 |
| ATOM | 509 | H5'  | DA | 17 | -3.095  | -10.917 | 6.985  | 1.00 | 0.00 |
| ATOM | 510 | H5'' | DA | 17 | -2.202  | -9.804  | 8.057  | 1.00 | 0.00 |
| ATOM | 511 | C4'  | DA | 17 | -2.039  | -9.347  | 5.993  | 1.00 | 0.00 |
| ATOM | 512 | H4'  | DA | 17 | -2.472  | -9.731  | 5.069  | 1.00 | 0.00 |
| ATOM | 513 | O4'  | DA | 17 | -2.136  | -7.911  | 5.869  | 1.00 | 0.00 |
| ATOM | 514 | C1'  | DA | 17 | -1.003  | -7.519  | 5.100  | 1.00 | 0.00 |
| ATOM | 515 | H1'  | DA | 17 | -1.084  | -7.764  | 4.041  | 1.00 | 0.00 |
| ATOM | 516 | N9   | DA | 17 | -0.993  | -6.058  | 5.100  | 1.00 | 0.00 |
| ATOM | 517 | C8   | DA | 17 | -2.014  | -5.149  | 5.100  | 1.00 | 0.00 |
| ATOM | 518 | H8   | DA | 17 | -3.049  | -5.454  | 5.149  | 1.00 | 0.00 |
| ATOM | 519 | N7   | DA | 17 | -1.563  | -3.883  | 5.100  | 1.00 | 0.00 |
| ATOM | 520 | C5   | DA | 17 | -0.226  | -4.006  | 5.100  | 1.00 | 0.00 |
| ATOM | 521 | C6   | DA | 17 | 0.802   | -3.053  | 5.100  | 1.00 | 0.00 |
| ATOM | 522 | N6   | DA | 17 | 0.581   | -1.736  | 5.100  | 1.00 | 0.00 |

|      |     |      |    |    |        |         |        |      |      |
|------|-----|------|----|----|--------|---------|--------|------|------|
| ATOM | 523 | H61  | DA | 17 | 1.360  | -1.093  | 5.100  | 1.00 | 0.00 |
| ATOM | 524 | H62  | DA | 17 | -0.365 | -1.383  | 5.100  | 1.00 | 0.00 |
| ATOM | 525 | N1   | DA | 17 | 2.050  | -3.524  | 5.100  | 1.00 | 0.00 |
| ATOM | 526 | C2   | DA | 17 | 2.304  | -4.832  | 5.100  | 1.00 | 0.00 |
| ATOM | 527 | H2   | DA | 17 | 3.313  | -5.216  | 5.100  | 1.00 | 0.00 |
| ATOM | 528 | N3   | DA | 17 | 1.418  | -5.827  | 5.100  | 1.00 | 0.00 |
| ATOM | 529 | C4   | DA | 17 | 0.163  | -5.329  | 5.100  | 1.00 | 0.00 |
| ATOM | 530 | C3'  | DA | 17 | -0.540 | -9.615  | 6.107  | 1.00 | 0.00 |
| ATOM | 531 | H3'  | DA | 17 | -0.253 | -9.974  | 7.096  | 1.00 | 0.00 |
| ATOM | 532 | C2'  | DA | 17 | 0.094  | -8.250  | 5.858  | 1.00 | 0.00 |
| ATOM | 533 | H2'  | DA | 17 | 0.798  | -8.024  | 6.659  | 1.00 | 0.00 |
| ATOM | 534 | H2'' | DA | 17 | 0.621  | -8.262  | 4.904  | 1.00 | 0.00 |
| ATOM | 535 | O3'  | DA | 17 | -0.149 | -10.606 | 5.159  | 1.00 | 0.00 |
| ATOM | 536 | P    | DA | 18 | 1.389  | -10.988 | 4.969  | 1.00 | 0.00 |
| ATOM | 537 | OP1  | DA | 18 | 2.057  | -10.939 | 6.289  | 1.00 | 0.00 |
| ATOM | 538 | OP2  | DA | 18 | 1.485  | -12.264 | 4.231  | 1.00 | 0.00 |
| ATOM | 539 | O5'  | DA | 18 | 1.881  | -9.824  | 3.982  | 1.00 | 0.00 |
| ATOM | 540 | C5'  | DA | 18 | 3.282  | -9.736  | 3.770  | 1.00 | 0.00 |
| ATOM | 541 | H5'  | DA | 18 | 3.655  | -10.743 | 3.584  | 1.00 | 0.00 |
| ATOM | 542 | H5'' | DA | 18 | 3.759  | -9.321  | 4.658  | 1.00 | 0.00 |
| ATOM | 543 | C4'  | DA | 18 | 3.633  | -8.850  | 2.593  | 1.00 | 0.00 |
| ATOM | 544 | H4'  | DA | 18 | 3.496  | -9.412  | 1.669  | 1.00 | 0.00 |
| ATOM | 545 | O4'  | DA | 18 | 2.736  | -7.724  | 2.469  | 1.00 | 0.00 |
| ATOM | 546 | C1'  | DA | 18 | 3.447  | -6.758  | 1.700  | 1.00 | 0.00 |
| ATOM | 547 | H1'  | DA | 18 | 3.520  | -7.005  | 0.641  | 1.00 | 0.00 |
| ATOM | 548 | N9   | DA | 18 | 2.624  | -5.550  | 1.700  | 1.00 | 0.00 |
| ATOM | 549 | C8   | DA | 18 | 1.268  | -5.382  | 1.700  | 1.00 | 0.00 |
| ATOM | 550 | H8   | DA | 18 | 0.590  | -6.221  | 1.749  | 1.00 | 0.00 |
| ATOM | 551 | N7   | DA | 18 | 0.920  | -4.084  | 1.700  | 1.00 | 0.00 |
| ATOM | 552 | C5   | DA | 18 | 2.090  | -3.425  | 1.700  | 1.00 | 0.00 |
| ATOM | 553 | C6   | DA | 18 | 2.395  | -2.057  | 1.700  | 1.00 | 0.00 |
| ATOM | 554 | N6   | DA | 18 | 1.465  | -1.099  | 1.700  | 1.00 | 0.00 |
| ATOM | 555 | H61  | DA | 18 | 1.741  | -0.127  | 1.700  | 1.00 | 0.00 |
| ATOM | 556 | H62  | DA | 18 | 0.486  | -1.346  | 1.700  | 1.00 | 0.00 |
| ATOM | 557 | N1   | DA | 18 | 3.689  | -1.736  | 1.700  | 1.00 | 0.00 |
| ATOM | 558 | C2   | DA | 18 | 4.641  | -2.667  | 1.700  | 1.00 | 0.00 |
| ATOM | 559 | H2   | DA | 18 | 5.690  | -2.410  | 1.700  | 1.00 | 0.00 |
| ATOM | 560 | N3   | DA | 18 | 4.477  | -3.990  | 1.700  | 1.00 | 0.00 |
| ATOM | 561 | C4   | DA | 18 | 3.161  | -4.293  | 1.700  | 1.00 | 0.00 |
| ATOM | 562 | C3'  | DA | 18 | 5.018  | -8.219  | 2.707  | 1.00 | 0.00 |
| ATOM | 563 | H3'  | DA | 18 | 5.457  | -8.352  | 3.696  | 1.00 | 0.00 |
| ATOM | 564 | C2'  | DA | 18 | 4.765  | -6.736  | 2.458  | 1.00 | 0.00 |
| ATOM | 565 | H2'  | DA | 18 | 5.217  | -6.150  | 3.259  | 1.00 | 0.00 |
| ATOM | 566 | H2'' | DA | 18 | 5.206  | -6.447  | 1.504  | 1.00 | 0.00 |
| ATOM | 567 | O3'  | DA | 18 | 5.903  | -8.813  | 1.759  | 1.00 | 0.00 |
| ATOM | 568 | P    | DT | 19 | 7.386  | -8.253  | 1.569  | 1.00 | 0.00 |
| ATOM | 569 | OP1  | DT | 19 | 7.908  | -7.833  | 2.889  | 1.00 | 0.00 |
| ATOM | 570 | OP2  | DT | 19 | 8.190  | -9.249  | 0.831  | 1.00 | 0.00 |
| ATOM | 571 | O5'  | DT | 19 | 7.130  | -7.016  | 0.582  | 1.00 | 0.00 |
| ATOM | 572 | C5'  | DT | 19 | 8.232  | -6.147  | 0.370  | 1.00 | 0.00 |
| ATOM | 573 | H5'  | DT | 19 | 9.113  | -6.762  | 0.186  | 1.00 | 0.00 |
| ATOM | 574 | H5'' | DT | 19 | 8.387  | -5.533  | 1.257  | 1.00 | 0.00 |
| ATOM | 575 | C4'  | DT | 19 | 8.018  | -5.220  | -0.807 | 1.00 | 0.00 |
| ATOM | 576 | H4'  | DT | 19 | 8.223  | -5.760  | -1.731 | 1.00 | 0.00 |
| ATOM | 577 | O4'  | DT | 19 | 6.640  | -4.801  | -0.931 | 1.00 | 0.00 |
| ATOM | 578 | C1'  | DT | 19 | 6.676  | -3.603  | -1.700 | 1.00 | 0.00 |
| ATOM | 579 | H1'  | DT | 19 | 6.870  | -3.782  | -2.758 | 1.00 | 0.00 |
| ATOM | 580 | N1   | DT | 19 | 5.313  | -3.076  | -1.700 | 1.00 | 0.00 |
| ATOM | 581 | C6   | DT | 19 | 4.392  | -4.064  | -1.700 | 1.00 | 0.00 |
| ATOM | 582 | H6   | DT | 19 | 4.706  | -5.096  | -1.656 | 1.00 | 0.00 |

|      |     |      |    |    |        |        |        |      |      |
|------|-----|------|----|----|--------|--------|--------|------|------|
| ATOM | 583 | C5   | DT | 19 | 3.054  | -3.784 | -1.700 | 1.00 | 0.00 |
| ATOM | 584 | C7   | DT | 19 | 2.113  | -4.965 | -1.700 | 1.00 | 0.00 |
| ATOM | 585 | H71  | DT | 19 | 2.288  | -5.570 | -0.810 | 1.00 | 0.00 |
| ATOM | 586 | H72  | DT | 19 | 1.083  | -4.609 | -1.700 | 1.00 | 0.00 |
| ATOM | 587 | H73  | DT | 19 | 2.288  | -5.570 | -2.590 | 1.00 | 0.00 |
| ATOM | 588 | C4   | DT | 19 | 2.638  | -2.459 | -1.700 | 1.00 | 0.00 |
| ATOM | 589 | O4   | DT | 19 | 1.467  | -2.104 | -1.700 | 1.00 | 0.00 |
| ATOM | 590 | N3   | DT | 19 | 3.614  | -1.531 | -1.700 | 1.00 | 0.00 |
| ATOM | 591 | H3   | DT | 19 | 3.316  | -0.483 | -1.700 | 1.00 | 0.00 |
| ATOM | 592 | C2   | DT | 19 | 4.927  | -1.784 | -1.700 | 1.00 | 0.00 |
| ATOM | 593 | O2   | DT | 19 | 5.747  | -0.872 | -1.700 | 1.00 | 0.00 |
| ATOM | 594 | C3'  | DT | 19 | 8.799  | -3.913 | -0.693 | 1.00 | 0.00 |
| ATOM | 595 | H3'  | DT | 19 | 9.236  | -3.773 | 0.296  | 1.00 | 0.00 |
| ATOM | 596 | C2'  | DT | 19 | 7.748  | -2.836 | -0.942 | 1.00 | 0.00 |
| ATOM | 597 | H2'  | DT | 19 | 7.787  | -2.097 | -0.141 | 1.00 | 0.00 |
| ATOM | 598 | H2'' | DT | 19 | 7.946  | -2.348 | -1.896 | 1.00 | 0.00 |
| ATOM | 599 | O3'  | DT | 19 | 9.865  | -3.899 | -1.641 | 1.00 | 0.00 |
| ATOM | 600 | P    | DT | 20 | 10.767 | -2.596 | -1.831 | 1.00 | 0.00 |
| ATOM | 601 | OP1  | DT | 20 | 10.958 | -1.954 | -0.511 | 1.00 | 0.00 |
| ATOM | 602 | OP2  | DT | 20 | 11.995 | -2.959 | -2.569 | 1.00 | 0.00 |
| ATOM | 603 | O5'  | DT | 20 | 9.853  | -1.723 | -2.818 | 1.00 | 0.00 |
| ATOM | 604 | C5'  | DT | 20 | 10.267 | -0.382 | -3.030 | 1.00 | 0.00 |
| ATOM | 605 | H5'  | DT | 20 | 11.341 | -0.390 | -3.216 | 1.00 | 0.00 |
| ATOM | 606 | H5'' | DT | 20 | 10.047 | 0.211  | -2.142 | 1.00 | 0.00 |
| ATOM | 607 | C4'  | DT | 20 | 9.563  | 0.260  | -4.207 | 1.00 | 0.00 |
| ATOM | 608 | H4'  | DT | 20 | 10.039 | -0.068 | -5.131 | 1.00 | 0.00 |
| ATOM | 609 | O4'  | DT | 20 | 8.192  | -0.179 | -4.331 | 1.00 | 0.00 |
| ATOM | 610 | C1'  | DT | 20 | 7.541  | 0.827  | -5.100 | 1.00 | 0.00 |
| ATOM | 611 | H1'  | DT | 20 | 7.802  | 0.790  | -6.158 | 1.00 | 0.00 |
| ATOM | 612 | N1   | DT | 20 | 6.120  | 0.487  | -5.100 | 1.00 | 0.00 |
| ATOM | 613 | C6   | DT | 20 | 5.923  | -0.849 | -5.100 | 1.00 | 0.00 |
| ATOM | 614 | H6   | DT | 20 | 6.768  | -1.520 | -5.056 | 1.00 | 0.00 |
| ATOM | 615 | C5   | DT | 20 | 4.663  | -1.379 | -5.100 | 1.00 | 0.00 |
| ATOM | 616 | C7   | DT | 20 | 4.560  | -2.885 | -5.100 | 1.00 | 0.00 |
| ATOM | 617 | H71  | DT | 20 | 5.048  | -3.283 | -4.210 | 1.00 | 0.00 |
| ATOM | 618 | H72  | DT | 20 | 3.510  | -3.178 | -5.100 | 1.00 | 0.00 |
| ATOM | 619 | H73  | DT | 20 | 5.048  | -3.283 | -5.990 | 1.00 | 0.00 |
| ATOM | 620 | C4   | DT | 20 | 3.569  | -0.525 | -5.100 | 1.00 | 0.00 |
| ATOM | 621 | O4   | DT | 20 | 2.403  | -0.898 | -5.100 | 1.00 | 0.00 |
| ATOM | 622 | N3   | DT | 20 | 3.844  | 0.793  | -5.100 | 1.00 | 0.00 |
| ATOM | 623 | H3   | DT | 20 | 3.003  | 1.486  | -5.100 | 1.00 | 0.00 |
| ATOM | 624 | C2   | DT | 20 | 5.068  | 1.331  | -5.100 | 1.00 | 0.00 |
| ATOM | 625 | O2   | DT | 20 | 5.225  | 2.548  | -5.100 | 1.00 | 0.00 |
| ATOM | 626 | C3'  | DT | 20 | 9.464  | 1.779  | -4.093 | 1.00 | 0.00 |
| ATOM | 627 | H3'  | DT | 20 | 9.744  | 2.143  | -3.104 | 1.00 | 0.00 |
| ATOM | 628 | C2'  | DT | 20 | 7.988  | 2.068  | -4.342 | 1.00 | 0.00 |
| ATOM | 629 | H2'  | DT | 20 | 7.601  | 2.698  | -3.542 | 1.00 | 0.00 |
| ATOM | 630 | H2'' | DT | 20 | 7.874  | 2.582  | -5.296 | 1.00 | 0.00 |
| ATOM | 631 | O3'  | DT | 20 | 10.333 | 2.396  | -5.041 | 1.00 | 0.00 |
| ATOM | 632 | P    | DC | 21 | 10.335 | 3.981  | -5.231 | 1.00 | 0.00 |
| ATOM | 633 | OP1  | DC | 21 | 10.128 | 4.618  | -3.911 | 1.00 | 0.00 |
| ATOM | 634 | OP2  | DC | 21 | 11.552 | 4.380  | -5.969 | 1.00 | 0.00 |
| ATOM | 635 | O5'  | DC | 21 | 9.088  | 4.180  | -6.218 | 1.00 | 0.00 |
| ATOM | 636 | C5'  | DC | 21 | 8.666  | 5.518  | -6.430 | 1.00 | 0.00 |
| ATOM | 637 | H5'  | DC | 21 | 9.554  | 6.123  | -6.614 | 1.00 | 0.00 |
| ATOM | 638 | H5'' | DC | 21 | 8.147  | 5.881  | -5.543 | 1.00 | 0.00 |
| ATOM | 639 | C4'  | DC | 21 | 7.723  | 5.647  | -7.607 | 1.00 | 0.00 |
| ATOM | 640 | H4'  | DC | 21 | 8.301  | 5.647  | -8.531 | 1.00 | 0.00 |
| ATOM | 641 | O4'  | DC | 21 | 6.843  | 4.507  | -7.731 | 1.00 | 0.00 |
| ATOM | 642 | C1'  | DC | 21 | 5.735  | 4.965  | -8.500 | 1.00 | 0.00 |

|      |     |      |    |    |        |        |         |      |      |
|------|-----|------|----|----|--------|--------|---------|------|------|
| ATOM | 643 | H1'  | DC | 21 | 6.017  | 5.058  | -9.549  | 1.00 | 0.00 |
| ATOM | 644 | N1   | DC | 21 | 4.760  | 3.877  | -8.500  | 1.00 | 0.00 |
| ATOM | 645 | C6   | DC | 21 | 5.245  | 2.599  | -8.500  | 1.00 | 0.00 |
| ATOM | 646 | H6   | DC | 21 | 6.310  | 2.418  | -8.500  | 1.00 | 0.00 |
| ATOM | 647 | C5   | DC | 21 | 4.386  | 1.524  | -8.500  | 1.00 | 0.00 |
| ATOM | 648 | H5   | DC | 21 | 4.770  | 0.504  | -8.500  | 1.00 | 0.00 |
| ATOM | 649 | C4   | DC | 21 | 3.041  | 1.822  | -8.500  | 1.00 | 0.00 |
| ATOM | 650 | N4   | DC | 21 | 2.134  | 0.855  | -8.500  | 1.00 | 0.00 |
| ATOM | 651 | H41  | DC | 21 | 1.161  | 1.124  | -8.500  | 1.00 | 0.00 |
| ATOM | 652 | H42  | DC | 21 | 2.422  | -0.113 | -8.500  | 1.00 | 0.00 |
| ATOM | 653 | N3   | DC | 21 | 2.584  | 3.102  | -8.500  | 1.00 | 0.00 |
| ATOM | 654 | C2   | DC | 21 | 3.443  | 4.152  | -8.500  | 1.00 | 0.00 |
| ATOM | 655 | O2   | DC | 21 | 3.041  | 5.310  | -8.500  | 1.00 | 0.00 |
| ATOM | 656 | C3'  | DC | 21 | 6.778  | 6.841  | -7.493  | 1.00 | 0.00 |
| ATOM | 657 | H3'  | DC | 21 | 6.801  | 7.300  | -6.504  | 1.00 | 0.00 |
| ATOM | 658 | C2'  | DC | 21 | 5.399  | 6.240  | -7.742  | 1.00 | 0.00 |
| ATOM | 659 | H2'  | DC | 21 | 4.722  | 6.538  | -6.941  | 1.00 | 0.00 |
| ATOM | 660 | H2'' | DC | 21 | 5.013  | 6.599  | -8.696  | 1.00 | 0.00 |
| ATOM | 661 | O3'  | DC | 21 | 7.142  | 7.842  | -8.441  | 1.00 | 0.00 |
| ATOM | 662 | P    | DG | 22 | 6.243  | 9.148  | -8.631  | 1.00 | 0.00 |
| ATOM | 663 | OP1  | DG | 22 | 5.711  | 9.554  | -7.311  | 1.00 | 0.00 |
| ATOM | 664 | OP2  | DG | 22 | 7.018  | 10.167 | -9.369  | 1.00 | 0.00 |
| ATOM | 665 | O5'  | DG | 22 | 5.104  | 8.603  | -9.618  | 1.00 | 0.00 |
| ATOM | 666 | C5'  | DG | 22 | 3.997  | 9.465  | -9.830  | 1.00 | 0.00 |
| ATOM | 667 | H5'  | DG | 22 | 4.384  | 10.467 | -10.015 | 1.00 | 0.00 |
| ATOM | 668 | H5'' | DG | 22 | 3.364  | 9.470  | -8.942  | 1.00 | 0.00 |
| ATOM | 669 | C4'  | DG | 22 | 3.147  | 9.035  | -11.007 | 1.00 | 0.00 |
| ATOM | 670 | H4'  | DG | 22 | 3.622  | 9.364  | -11.931 | 1.00 | 0.00 |
| ATOM | 671 | O4'  | DG | 22 | 3.071  | 7.597  | -11.131 | 1.00 | 0.00 |
| ATOM | 672 | C1'  | DG | 22 | 1.899  | 7.344  | -11.900 | 1.00 | 0.00 |
| ATOM | 673 | H1'  | DG | 22 | 2.077  | 7.581  | -12.949 | 1.00 | 0.00 |
| ATOM | 674 | N9   | DG | 22 | 1.714  | 5.895  | -11.900 | 1.00 | 0.00 |
| ATOM | 675 | C8   | DG | 22 | 2.707  | 4.942  | -11.900 | 1.00 | 0.00 |
| ATOM | 676 | H8   | DG | 22 | 3.755  | 5.201  | -11.902 | 1.00 | 0.00 |
| ATOM | 677 | N7   | DG | 22 | 2.202  | 3.700  | -11.900 | 1.00 | 0.00 |
| ATOM | 678 | C5   | DG | 22 | 0.870  | 3.906  | -11.900 | 1.00 | 0.00 |
| ATOM | 679 | C6   | DG | 22 | -0.187 | 2.983  | -11.900 | 1.00 | 0.00 |
| ATOM | 680 | O6   | DG | 22 | -0.126 | 1.751  | -11.900 | 1.00 | 0.00 |
| ATOM | 681 | N1   | DG | 22 | -1.410 | 3.608  | -11.900 | 1.00 | 0.00 |
| ATOM | 682 | H1   | DG | 22 | -2.203 | 2.998  | -11.900 | 1.00 | 0.00 |
| ATOM | 683 | C2   | DG | 22 | -1.650 | 4.948  | -11.900 | 1.00 | 0.00 |
| ATOM | 684 | N2   | DG | 22 | -2.921 | 5.360  | -11.900 | 1.00 | 0.00 |
| ATOM | 685 | H21  | DG | 22 | -3.748 | 4.780  | -11.912 | 1.00 | 0.00 |
| ATOM | 686 | H22  | DG | 22 | -3.072 | 6.359  | -11.909 | 1.00 | 0.00 |
| ATOM | 687 | N3   | DG | 22 | -0.654 | 5.830  | -11.900 | 1.00 | 0.00 |
| ATOM | 688 | C4   | DG | 22 | 0.549  | 5.243  | -11.900 | 1.00 | 0.00 |
| ATOM | 689 | C3'  | DG | 22 | 1.691  | 9.480  | -10.893 | 1.00 | 0.00 |
| ATOM | 690 | H3'  | DG | 22 | 1.450  | 9.871  | -9.904  | 1.00 | 0.00 |
| ATOM | 691 | C2'  | DG | 22 | 0.898  | 8.202  | -11.142 | 1.00 | 0.00 |
| ATOM | 692 | H2'  | DG | 22 | 0.172  | 8.063  | -10.341 | 1.00 | 0.00 |
| ATOM | 693 | H2'' | DG | 22 | 0.376  | 8.278  | -12.096 | 1.00 | 0.00 |
| ATOM | 694 | O3'  | DG | 22 | 1.422  | 10.511 | -11.841 | 1.00 | 0.00 |
| ATOM | 695 | P    | DC | 23 | -0.059 | 11.075 | -12.031 | 1.00 | 0.00 |
| ATOM | 696 | OP1  | DC | 23 | -0.728 | 11.107 | -10.711 | 1.00 | 0.00 |
| ATOM | 697 | OP2  | DC | 23 | -0.001 | 12.354 | -12.769 | 1.00 | 0.00 |
| ATOM | 698 | O5'  | DC | 23 | -0.687 | 9.979  | -13.018 | 1.00 | 0.00 |
| ATOM | 699 | C5'  | DC | 23 | -2.088 | 10.060 | -13.230 | 1.00 | 0.00 |
| ATOM | 700 | H5'  | DC | 23 | -2.338 | 11.105 | -13.415 | 1.00 | 0.00 |
| ATOM | 701 | H5'' | DC | 23 | -2.611 | 9.705  | -12.342 | 1.00 | 0.00 |
| ATOM | 702 | C4'  | DC | 23 | -2.543 | 9.223  | -14.407 | 1.00 | 0.00 |



## IILt

|      |    |      |     |   |        |        |         |      |      |
|------|----|------|-----|---|--------|--------|---------|------|------|
| ATOM | 1  | HO5' | DC5 | 1 | 1.879  | -9.095 | -21.303 | 1.00 | 0.00 |
| ATOM | 2  | O5'  | DC5 | 1 | 1.418  | -8.563 | -20.650 | 1.00 | 0.00 |
| ATOM | 3  | C5'  | DC5 | 1 | 1.553  | -8.896 | -19.260 | 1.00 | 0.00 |
| ATOM | 4  | H5'  | DC5 | 1 | 2.610  | -8.780 | -19.020 | 1.00 | 0.00 |
| ATOM | 5  | H5'' | DC5 | 1 | 1.239  | -9.915 | -19.033 | 1.00 | 0.00 |
| ATOM | 6  | C4'  | DC5 | 1 | 0.750  | -7.935 | -18.430 | 1.00 | 0.00 |
| ATOM | 7  | H4'  | DC5 | 1 | 0.622  | -8.439 | -17.472 | 1.00 | 0.00 |
| ATOM | 8  | O4'  | DC5 | 1 | 1.422  | -6.691 | -18.100 | 1.00 | 0.00 |
| ATOM | 9  | C1'  | DC5 | 1 | 0.509  | -5.597 | -18.250 | 1.00 | 0.00 |
| ATOM | 10 | H1'  | DC5 | 1 | -0.103 | -5.364 | -17.379 | 1.00 | 0.00 |
| ATOM | 11 | N1   | DC5 | 1 | 1.306  | -4.380 | -18.450 | 1.00 | 0.00 |
| ATOM | 12 | C6   | DC5 | 1 | 2.678  | -4.387 | -18.420 | 1.00 | 0.00 |
| ATOM | 13 | H6   | DC5 | 1 | 3.184  | -5.339 | -18.353 | 1.00 | 0.00 |
| ATOM | 14 | C5   | DC5 | 1 | 3.407  | -3.267 | -18.470 | 1.00 | 0.00 |
| ATOM | 15 | H5   | DC5 | 1 | 4.495  | -3.331 | -18.456 | 1.00 | 0.00 |
| ATOM | 16 | C4   | DC5 | 1 | 2.690  | -2.013 | -18.550 | 1.00 | 0.00 |
| ATOM | 17 | N4   | DC5 | 1 | 3.395  | -0.891 | -18.600 | 1.00 | 0.00 |
| ATOM | 18 | H41  | DC5 | 1 | 2.887  | -0.020 | -18.656 | 1.00 | 0.00 |
| ATOM | 19 | H42  | DC5 | 1 | 4.404  | -0.923 | -18.582 | 1.00 | 0.00 |
| ATOM | 20 | N3   | DC5 | 1 | 1.373  | -2.005 | -18.580 | 1.00 | 0.00 |
| ATOM | 21 | C2   | DC5 | 1 | 0.649  | -3.134 | -18.530 | 1.00 | 0.00 |
| ATOM | 22 | O2   | DC5 | 1 | -0.590 | -3.125 | -18.560 | 1.00 | 0.00 |
| ATOM | 23 | C3'  | DC5 | 1 | -0.564 | -7.499 | -19.050 | 1.00 | 0.00 |
| ATOM | 24 | H3'  | DC5 | 1 | -0.908 | -8.059 | -19.920 | 1.00 | 0.00 |
| ATOM | 25 | C2'  | DC5 | 1 | -0.306 | -6.042 | -19.450 | 1.00 | 0.00 |
| ATOM | 26 | H2'  | DC5 | 1 | -0.199 | -5.975 | -20.533 | 1.00 | 0.00 |
| ATOM | 27 | H2'' | DC5 | 1 | -1.144 | -5.423 | -19.130 | 1.00 | 0.00 |
| ATOM | 28 | O3'  | DC5 | 1 | -1.546 | -7.533 | -18.040 | 1.00 | 0.00 |
| ATOM | 29 | P    | DG  | 2 | -2.825 | -8.492 | -18.200 | 1.00 | 0.00 |
| ATOM | 30 | OP1  | DG  | 2 | -3.335 | -8.553 | -19.560 | 1.00 | 0.00 |
| ATOM | 31 | OP2  | DG  | 2 | -2.583 | -9.847 | -17.710 | 1.00 | 0.00 |
| ATOM | 32 | O5'  | DG  | 2 | -3.887 | -7.761 | -17.250 | 1.00 | 0.00 |
| ATOM | 33 | C5'  | DG  | 2 | -3.973 | -8.109 | -15.860 | 1.00 | 0.00 |
| ATOM | 34 | H5'  | DG  | 2 | -3.050 | -8.637 | -15.621 | 1.00 | 0.00 |
| ATOM | 35 | H5'' | DG  | 2 | -4.863 | -8.715 | -15.691 | 1.00 | 0.00 |
| ATOM | 36 | C4'  | DG  | 2 | -4.057 | -6.860 | -15.030 | 1.00 | 0.00 |
| ATOM | 37 | H4'  | DG  | 2 | -4.456 | -7.193 | -14.072 | 1.00 | 0.00 |
| ATOM | 38 | O4'  | DG  | 2 | -2.782 | -6.249 | -14.700 | 1.00 | 0.00 |
| ATOM | 39 | C1'  | DG  | 2 | -2.878 | -4.827 | -14.850 | 1.00 | 0.00 |
| ATOM | 40 | H1'  | DG  | 2 | -3.246 | -4.259 | -13.995 | 1.00 | 0.00 |
| ATOM | 41 | N9   | DG  | 2 | -1.518 | -4.311 | -15.050 | 1.00 | 0.00 |
| ATOM | 42 | C8   | DG  | 2 | -0.362 | -5.057 | -15.020 | 1.00 | 0.00 |
| ATOM | 43 | H8   | DG  | 2 | -0.439 | -6.132 | -14.950 | 1.00 | 0.00 |
| ATOM | 44 | N7   | DG  | 2 | 0.754  | -4.365 | -15.080 | 1.00 | 0.00 |
| ATOM | 45 | C5   | DG  | 2 | 0.288  | -3.046 | -15.150 | 1.00 | 0.00 |
| ATOM | 46 | C6   | DG  | 2 | 1.034  | -1.805 | -15.240 | 1.00 | 0.00 |
| ATOM | 47 | O6   | DG  | 2 | 2.249  | -1.701 | -15.260 | 1.00 | 0.00 |
| ATOM | 48 | N1   | DG  | 2 | 0.180  | -0.707 | -15.290 | 1.00 | 0.00 |
| ATOM | 49 | H1   | DG  | 2 | 0.615  | 0.192  | -15.345 | 1.00 | 0.00 |
| ATOM | 50 | C2   | DG  | 2 | -1.197 | -0.745 | -15.270 | 1.00 | 0.00 |
| ATOM | 51 | N2   | DG  | 2 | -1.856 | 0.406  | -15.330 | 1.00 | 0.00 |
| ATOM | 52 | H21  | DG  | 2 | -1.457 | 1.333  | -15.379 | 1.00 | 0.00 |
| ATOM | 53 | H22  | DG  | 2 | -2.864 | 0.350  | -15.305 | 1.00 | 0.00 |
| ATOM | 54 | N3   | DG  | 2 | -1.885 | -1.919 | -15.190 | 1.00 | 0.00 |
| ATOM | 55 | C4   | DG  | 2 | -1.184 | -3.069 | -15.130 | 1.00 | 0.00 |
| ATOM | 56 | C3'  | DG  | 2 | -4.864 | -5.735 | -15.650 | 1.00 | 0.00 |
| ATOM | 57 | H3'  | DG  | 2 | -5.471 | -5.986 | -16.520 | 1.00 | 0.00 |

|      |     |      |    |   |         |        |         |      |      |
|------|-----|------|----|---|---------|--------|---------|------|------|
| ATOM | 58  | C2'  | DG | 2 | -3.799  | -4.708 | -16.050 | 1.00 | 0.00 |
| ATOM | 59  | H2'  | DG | 2 | -3.673  | -4.717 | -17.133 | 1.00 | 0.00 |
| ATOM | 60  | H2'' | DG | 2 | -4.113  | -3.715 | -15.729 | 1.00 | 0.00 |
| ATOM | 61  | O3'  | DG | 2 | -5.679  | -5.185 | -14.640 | 1.00 | 0.00 |
| ATOM | 62  | P    | DC | 3 | -7.277  | -5.210 | -14.800 | 1.00 | 0.00 |
| ATOM | 63  | OP1  | DC | 3 | -7.725  | -4.959 | -16.160 | 1.00 | 0.00 |
| ATOM | 64  | OP2  | DC | 3 | -7.878  | -6.448 | -14.310 | 1.00 | 0.00 |
| ATOM | 65  | O5'  | DC | 3 | -7.706  | -3.995 | -13.850 | 1.00 | 0.00 |
| ATOM | 66  | C5'  | DC | 3 | -7.980  | -4.225 | -12.460 | 1.00 | 0.00 |
| ATOM | 67  | H5'  | DC | 3 | -7.544  | -5.194 | -12.220 | 1.00 | 0.00 |
| ATOM | 68  | H5'' | DC | 3 | -9.056  | -4.193 | -12.291 | 1.00 | 0.00 |
| ATOM | 69  | C4'  | DC | 3 | -7.315  | -3.165 | -11.630 | 1.00 | 0.00 |
| ATOM | 70  | H4'  | DC | 3 | -7.834  | -3.199 | -10.672 | 1.00 | 0.00 |
| ATOM | 71  | O4'  | DC | 3 | -5.924  | -3.420 | -11.300 | 1.00 | 0.00 |
| ATOM | 72  | C1'  | DC | 3 | -5.166  | -2.214 | -11.450 | 1.00 | 0.00 |
| ATOM | 73  | H1'  | DC | 3 | -5.134  | -1.560 | -10.579 | 1.00 | 0.00 |
| ATOM | 74  | N1   | DC | 3 | -3.762  | -2.595 | -11.650 | 1.00 | 0.00 |
| ATOM | 75  | C6   | DC | 3 | -3.345  | -3.903 | -11.620 | 1.00 | 0.00 |
| ATOM | 76  | H6   | DC | 3 | -4.093  | -4.679 | -11.553 | 1.00 | 0.00 |
| ATOM | 77  | C5   | DC | 3 | -2.054  | -4.250 | -11.670 | 1.00 | 0.00 |
| ATOM | 78  | H5   | DC | 3 | -1.779  | -5.305 | -11.656 | 1.00 | 0.00 |
| ATOM | 79  | C4   | DC | 3 | -1.083  | -3.181 | -11.750 | 1.00 | 0.00 |
| ATOM | 80  | N4   | DC | 3 | 0.202   | -3.504 | -11.800 | 1.00 | 0.00 |
| ATOM | 81  | H41  | DC | 3 | 0.873   | -2.752 | -11.856 | 1.00 | 0.00 |
| ATOM | 82  | H42  | DC | 3 | 0.484   | -4.474 | -11.782 | 1.00 | 0.00 |
| ATOM | 83  | N3   | DC | 3 | -1.483  | -1.925 | -11.780 | 1.00 | 0.00 |
| ATOM | 84  | C2   | DC | 3 | -2.780  | -1.585 | -11.730 | 1.00 | 0.00 |
| ATOM | 85  | O2   | DC | 3 | -3.154  | -0.404 | -11.760 | 1.00 | 0.00 |
| ATOM | 86  | C3'  | DC | 3 | -7.306  | -1.781 | -12.250 | 1.00 | 0.00 |
| ATOM | 87  | H3'  | DC | 3 | -7.945  | -1.627 | -13.120 | 1.00 | 0.00 |
| ATOM | 88  | C2'  | DC | 3 | -5.841  | -1.576 | -12.650 | 1.00 | 0.00 |
| ATOM | 89  | H2'  | DC | 3 | -5.745  | -1.657 | -13.733 | 1.00 | 0.00 |
| ATOM | 90  | H2'' | DC | 3 | -5.511  | -0.588 | -12.329 | 1.00 | 0.00 |
| ATOM | 91  | O3'  | DC | 3 | -7.642  | -0.857 | -11.240 | 1.00 | 0.00 |
| ATOM | 92  | P    | DG | 4 | -8.950  | 0.062  | -11.400 | 1.00 | 0.00 |
| ATOM | 93  | OP1  | DG | 4 | -9.165  | 0.528  | -12.760 | 1.00 | 0.00 |
| ATOM | 94  | OP2  | DG | 4 | -10.163 | -0.586 | -10.910 | 1.00 | 0.00 |
| ATOM | 95  | O5'  | DG | 4 | -8.582  | 1.298  | -10.450 | 1.00 | 0.00 |
| ATOM | 96  | C5'  | DG | 4 | -8.940  | 1.272  | -9.060  | 1.00 | 0.00 |
| ATOM | 97  | H5'  | DG | 4 | -9.156  | 0.231  | -8.821  | 1.00 | 0.00 |
| ATOM | 98  | H5'' | DG | 4 | -9.792  | 1.930  | -8.891  | 1.00 | 0.00 |
| ATOM | 99  | C4'  | DG | 4 | -7.778  | 1.739  | -8.230  | 1.00 | 0.00 |
| ATOM | 100 | H4'  | DG | 4 | -8.218  | 2.016  | -7.272  | 1.00 | 0.00 |
| ATOM | 101 | O4'  | DG | 4 | -6.803  | 0.715  | -7.900  | 1.00 | 0.00 |
| ATOM | 102 | C1'  | DG | 4 | -5.480  | 1.245  | -8.050  | 1.00 | 0.00 |
| ATOM | 103 | H1'  | DG | 4 | -5.054  | 1.771  | -7.195  | 1.00 | 0.00 |
| ATOM | 104 | N9   | DG | 4 | -4.569  | 0.112  | -8.250  | 1.00 | 0.00 |
| ATOM | 105 | C8   | DG | 4 | -4.922  | -1.218 | -8.220  | 1.00 | 0.00 |
| ATOM | 106 | H8   | DG | 4 | -5.968  | -1.476 | -8.150  | 1.00 | 0.00 |
| ATOM | 107 | N7   | DG | 4 | -3.919  | -2.066 | -8.280  | 1.00 | 0.00 |
| ATOM | 108 | C5   | DG | 4 | -2.808  | -1.215 | -8.350  | 1.00 | 0.00 |
| ATOM | 109 | C6   | DG | 4 | -1.397  | -1.541 | -8.440  | 1.00 | 0.00 |
| ATOM | 110 | O6   | DG | 4 | -0.923  | -2.665 | -8.460  | 1.00 | 0.00 |
| ATOM | 111 | N1   | DG | 4 | -0.617  | -0.390 | -8.490  | 1.00 | 0.00 |
| ATOM | 112 | H1   | DG | 4 | 0.372   | -0.526 | -8.545  | 1.00 | 0.00 |
| ATOM | 113 | C2   | DG | 4 | -1.079  | 0.908  | -8.470  | 1.00 | 0.00 |
| ATOM | 114 | N2   | DG | 4 | -0.187  | 1.891  | -8.530  | 1.00 | 0.00 |
| ATOM | 115 | H21  | DG | 4 | 0.818   | 1.798  | -8.579  | 1.00 | 0.00 |
| ATOM | 116 | H22  | DG | 4 | -0.551  | 2.833  | -8.505  | 1.00 | 0.00 |
| ATOM | 117 | N3   | DG | 4 | -2.407  | 1.200  | -8.390  | 1.00 | 0.00 |

|      |     |      |    |   |        |        |         |      |      |
|------|-----|------|----|---|--------|--------|---------|------|------|
| ATOM | 118 | C4   | DG | 4 | -3.285 | 0.178  | -8.330  | 1.00 | 0.00 |
| ATOM | 119 | C3'  | DG | 4 | -6.958 | 2.854  | -8.850  | 1.00 | 0.00 |
| ATOM | 120 | H3'  | DG | 4 | -7.384 | 3.354  | -9.720  | 1.00 | 0.00 |
| ATOM | 121 | C2'  | DG | 4 | -5.652 | 2.158  | -9.250  | 1.00 | 0.00 |
| ATOM | 122 | H2'  | DG | 4 | -5.622 | 2.035  | -10.333 | 1.00 | 0.00 |
| ATOM | 123 | H2'' | DG | 4 | -4.804 | 2.764  | -8.930  | 1.00 | 0.00 |
| ATOM | 124 | O3'  | DG | 4 | -6.686 | 3.798  | -7.840  | 1.00 | 0.00 |
| ATOM | 125 | P    | DA | 5 | -7.204 | 5.311  | -8.000  | 1.00 | 0.00 |
| ATOM | 126 | OP1  | DA | 5 | -7.104 | 5.814  | -9.360  | 1.00 | 0.00 |
| ATOM | 127 | OP2  | DA | 5 | -8.567 | 5.500  | -7.510  | 1.00 | 0.00 |
| ATOM | 128 | O5'  | DA | 5 | -6.180 | 6.095  | -7.050  | 1.00 | 0.00 |
| ATOM | 129 | C5'  | DA | 5 | -6.485 | 6.284  | -5.660  | 1.00 | 0.00 |
| ATOM | 130 | H5'  | DA | 5 | -7.272 | 5.569  | -5.421  | 1.00 | 0.00 |
| ATOM | 131 | H5'' | DA | 5 | -6.787 | 7.318  | -5.491  | 1.00 | 0.00 |
| ATOM | 132 | C4'  | DA | 5 | -5.271 | 5.978  | -4.830  | 1.00 | 0.00 |
| ATOM | 133 | H4'  | DA | 5 | -5.464 | 6.461  | -3.872  | 1.00 | 0.00 |
| ATOM | 134 | O4'  | DA | 5 | -5.083 | 4.577  | -4.500  | 1.00 | 0.00 |
| ATOM | 135 | C1'  | DA | 5 | -3.702 | 4.229  | -4.650  | 1.00 | 0.00 |
| ATOM | 136 | H1'  | DA | 5 | -2.982 | 4.402  | -3.850  | 1.00 | 0.00 |
| ATOM | 137 | N9   | DA | 5 | -3.630 | 2.776  | -4.850  | 1.00 | 0.00 |
| ATOM | 138 | C8   | DA | 5 | -4.698 | 1.879  | -4.820  | 1.00 | 0.00 |
| ATOM | 139 | H8   | DA | 5 | -5.715 | 2.243  | -4.802  | 1.00 | 0.00 |
| ATOM | 140 | N7   | DA | 5 | -4.327 | 0.608  | -4.880  | 1.00 | 0.00 |
| ATOM | 141 | C5   | DA | 5 | -2.971 | 0.691  | -4.950  | 1.00 | 0.00 |
| ATOM | 142 | C6   | DA | 5 | -1.962 | -0.335 | -5.030  | 1.00 | 0.00 |
| ATOM | 143 | N6   | DA | 5 | -2.276 | -1.666 | -5.060  | 1.00 | 0.00 |
| ATOM | 144 | H61  | DA | 5 | -1.542 | -2.357 | -5.116  | 1.00 | 0.00 |
| ATOM | 145 | H62  | DA | 5 | -3.242 | -1.958 | -5.026  | 1.00 | 0.00 |
| ATOM | 146 | N1   | DA | 5 | -0.698 | 0.052  | -5.090  | 1.00 | 0.00 |
| ATOM | 147 | C2   | DA | 5 | -0.410 | 1.359  | -5.050  | 1.00 | 0.00 |
| ATOM | 148 | H2   | DA | 5 | 0.619  | 1.685  | -5.074  | 1.00 | 0.00 |
| ATOM | 149 | N3   | DA | 5 | -1.248 | 2.417  | -4.980  | 1.00 | 0.00 |
| ATOM | 150 | C4   | DA | 5 | -2.507 | 1.973  | -4.930  | 1.00 | 0.00 |
| ATOM | 151 | C3'  | DA | 5 | -3.952 | 6.398  | -5.450  | 1.00 | 0.00 |
| ATOM | 152 | H3'  | DA | 5 | -4.003 | 7.053  | -6.320  | 1.00 | 0.00 |
| ATOM | 153 | C2'  | DA | 5 | -3.304 | 5.068  | -5.850  | 1.00 | 0.00 |
| ATOM | 154 | H2'  | DA | 5 | -3.351 | 4.951  | -6.933  | 1.00 | 0.00 |
| ATOM | 155 | H2'' | DA | 5 | -2.262 | 5.060  | -5.529  | 1.00 | 0.00 |
| ATOM | 156 | O3'  | DA | 5 | -3.177 | 7.003  | -4.440  | 1.00 | 0.00 |
| ATOM | 157 | P    | DA | 6 | -2.706 | 8.531  | -4.600  | 1.00 | 0.00 |
| ATOM | 158 | OP1  | DA | 6 | -2.329 | 8.880  | -5.960  | 1.00 | 0.00 |
| ATOM | 159 | OP2  | DA | 6 | -3.698 | 9.485  | -4.110  | 1.00 | 0.00 |
| ATOM | 160 | O5'  | DA | 6 | -1.418 | 8.563  | -3.650  | 1.00 | 0.00 |
| ATOM | 161 | C5'  | DA | 6 | -1.553 | 8.896  | -2.260  | 1.00 | 0.00 |
| ATOM | 162 | H5'  | DA | 6 | -2.610 | 8.780  | -2.020  | 1.00 | 0.00 |
| ATOM | 163 | H5'' | DA | 6 | -1.190 | 9.910  | -2.092  | 1.00 | 0.00 |
| ATOM | 164 | C4'  | DA | 6 | -0.750 | 7.935  | -1.430  | 1.00 | 0.00 |
| ATOM | 165 | H4'  | DA | 6 | -0.622 | 8.439  | -0.472  | 1.00 | 0.00 |
| ATOM | 166 | O4'  | DA | 6 | -1.422 | 6.691  | -1.100  | 1.00 | 0.00 |
| ATOM | 167 | C1'  | DA | 6 | -0.509 | 5.597  | -1.250  | 1.00 | 0.00 |
| ATOM | 168 | H1'  | DA | 6 | 0.175  | 5.314  | -0.450  | 1.00 | 0.00 |
| ATOM | 169 | N9   | DA | 6 | -1.306 | 4.380  | -1.450  | 1.00 | 0.00 |
| ATOM | 170 | C8   | DA | 6 | -2.696 | 4.282  | -1.420  | 1.00 | 0.00 |
| ATOM | 171 | H8   | DA | 6 | -3.304 | 5.175  | -1.402  | 1.00 | 0.00 |
| ATOM | 172 | N7   | DA | 6 | -3.144 | 3.036  | -1.480  | 1.00 | 0.00 |
| ATOM | 173 | C5   | DA | 6 | -1.997 | 2.305  | -1.550  | 1.00 | 0.00 |
| ATOM | 174 | C6   | DA | 6 | -1.784 | 0.882  | -1.630  | 1.00 | 0.00 |
| ATOM | 175 | N6   | DA | 6 | -2.820 | -0.010 | -1.660  | 1.00 | 0.00 |
| ATOM | 176 | H61  | DA | 6 | -2.632 | -1.001 | -1.716  | 1.00 | 0.00 |
| ATOM | 177 | H62  | DA | 6 | -3.773 | 0.322  | -1.626  | 1.00 | 0.00 |



|      |     |      |    |   |        |       |        |      |      |
|------|-----|------|----|---|--------|-------|--------|------|------|
| ATOM | 178 | N1   | DA | 6 | -0.534 | 0.453 | -1.690 | 1.00 | 0.00 |
| ATOM | 179 | C2   | DA | 6 | 0.467  | 1.341 | -1.650 | 1.00 | 0.00 |
| ATOM | 180 | H2   | DA | 6 | 1.491  | 1.000 | -1.674 | 1.00 | 0.00 |
| ATOM | 181 | N3   | DA | 6 | 0.411  | 2.689 | -1.580 | 1.00 | 0.00 |
| ATOM | 182 | C4   | DA | 6 | -0.869 | 3.069 | -1.530 | 1.00 | 0.00 |
| ATOM | 183 | C3'  | DA | 6 | 0.564  | 7.499 | -2.050 | 1.00 | 0.00 |
| ATOM | 184 | H3'  | DA | 6 | 0.908  | 8.059 | -2.920 | 1.00 | 0.00 |
| ATOM | 185 | C2'  | DA | 6 | 0.306  | 6.042 | -2.450 | 1.00 | 0.00 |
| ATOM | 186 | H2'  | DA | 6 | 0.199  | 5.975 | -3.533 | 1.00 | 0.00 |
| ATOM | 187 | H2'' | DA | 6 | 1.144  | 5.423 | -2.130 | 1.00 | 0.00 |
| ATOM | 188 | O3'  | DA | 6 | 1.546  | 7.533 | -1.040 | 1.00 | 0.00 |
| ATOM | 189 | P    | DT | 7 | 2.825  | 8.492 | -1.200 | 1.00 | 0.00 |
| ATOM | 190 | OP1  | DT | 7 | 3.335  | 8.553 | -2.560 | 1.00 | 0.00 |
| ATOM | 191 | OP2  | DT | 7 | 2.583  | 9.847 | -0.710 | 1.00 | 0.00 |
| ATOM | 192 | O5'  | DT | 7 | 3.887  | 7.761 | -0.250 | 1.00 | 0.00 |
| ATOM | 193 | C5'  | DT | 7 | 3.973  | 8.109 | 1.140  | 1.00 | 0.00 |
| ATOM | 194 | H5'  | DT | 7 | 3.050  | 8.637 | 1.379  | 1.00 | 0.00 |
| ATOM | 195 | H5'' | DT | 7 | 4.863  | 8.715 | 1.309  | 1.00 | 0.00 |
| ATOM | 196 | C4'  | DT | 7 | 4.057  | 6.860 | 1.970  | 1.00 | 0.00 |
| ATOM | 197 | H4'  | DT | 7 | 4.456  | 7.193 | 2.928  | 1.00 | 0.00 |
| ATOM | 198 | O4'  | DT | 7 | 2.782  | 6.249 | 2.300  | 1.00 | 0.00 |
| ATOM | 199 | C1'  | DT | 7 | 2.878  | 4.827 | 2.150  | 1.00 | 0.00 |
| ATOM | 200 | H1'  | DT | 7 | 3.240  | 4.243 | 2.996  | 1.00 | 0.00 |
| ATOM | 201 | N1   | DT | 7 | 1.518  | 4.311 | 1.950  | 1.00 | 0.00 |
| ATOM | 202 | C6   | DT | 7 | 0.392  | 5.095 | 1.980  | 1.00 | 0.00 |
| ATOM | 203 | H6   | DT | 7 | 0.543  | 6.164 | 2.012  | 1.00 | 0.00 |
| ATOM | 204 | C5   | DT | 7 | -0.873 | 4.618 | 1.930  | 1.00 | 0.00 |
| ATOM | 205 | C7   | DT | 7 | -2.084 | 5.573 | 1.970  | 1.00 | 0.00 |
| ATOM | 206 | H71  | DT | 7 | -2.037 | 6.256 | 1.122  | 1.00 | 0.00 |
| ATOM | 207 | H72  | DT | 7 | -3.006 | 4.994 | 1.919  | 1.00 | 0.00 |
| ATOM | 208 | H73  | DT | 7 | -2.066 | 6.145 | 2.898  | 1.00 | 0.00 |
| ATOM | 209 | C4   | DT | 7 | -1.010 | 3.204 | 1.850  | 1.00 | 0.00 |
| ATOM | 210 | O4   | DT | 7 | -2.107 | 2.630 | 1.800  | 1.00 | 0.00 |
| ATOM | 211 | N3   | DT | 7 | 0.172  | 2.454 | 1.820  | 1.00 | 0.00 |
| ATOM | 212 | H3   | DT | 7 | 0.097  | 1.368 | 1.760  | 1.00 | 0.00 |
| ATOM | 213 | C2   | DT | 7 | 1.435  | 2.983 | 1.870  | 1.00 | 0.00 |
| ATOM | 214 | O2   | DT | 7 | 2.413  | 2.266 | 1.850  | 1.00 | 0.00 |
| ATOM | 215 | C3'  | DT | 7 | 4.864  | 5.735 | 1.350  | 1.00 | 0.00 |
| ATOM | 216 | H3'  | DT | 7 | 5.471  | 5.986 | 0.480  | 1.00 | 0.00 |
| ATOM | 217 | C2'  | DT | 7 | 3.799  | 4.708 | 0.950  | 1.00 | 0.00 |
| ATOM | 218 | H2'  | DT | 7 | 3.673  | 4.717 | -0.133 | 1.00 | 0.00 |
| ATOM | 219 | H2'' | DT | 7 | 4.113  | 3.715 | 1.271  | 1.00 | 0.00 |
| ATOM | 220 | O3'  | DT | 7 | 5.679  | 5.185 | 2.360  | 1.00 | 0.00 |
| ATOM | 221 | P    | DT | 8 | 7.277  | 5.210 | 2.200  | 1.00 | 0.00 |
| ATOM | 222 | OP1  | DT | 8 | 7.725  | 4.959 | 0.840  | 1.00 | 0.00 |
| ATOM | 223 | OP2  | DT | 8 | 7.878  | 6.448 | 2.690  | 1.00 | 0.00 |
| ATOM | 224 | O5'  | DT | 8 | 7.706  | 3.995 | 3.150  | 1.00 | 0.00 |
| ATOM | 225 | C5'  | DT | 8 | 7.980  | 4.225 | 4.540  | 1.00 | 0.00 |
| ATOM | 226 | H5'  | DT | 8 | 7.544  | 5.194 | 4.780  | 1.00 | 0.00 |
| ATOM | 227 | H5'' | DT | 8 | 9.056  | 4.193 | 4.709  | 1.00 | 0.00 |
| ATOM | 228 | C4'  | DT | 8 | 7.315  | 3.165 | 5.370  | 1.00 | 0.00 |
| ATOM | 229 | H4'  | DT | 8 | 7.834  | 3.199 | 6.328  | 1.00 | 0.00 |
| ATOM | 230 | O4'  | DT | 8 | 5.924  | 3.420 | 5.700  | 1.00 | 0.00 |
| ATOM | 231 | C1'  | DT | 8 | 5.166  | 2.214 | 5.550  | 1.00 | 0.00 |
| ATOM | 232 | H1'  | DT | 8 | 5.116  | 1.528 | 6.396  | 1.00 | 0.00 |
| ATOM | 233 | N1   | DT | 8 | 3.762  | 2.595 | 5.350  | 1.00 | 0.00 |
| ATOM | 234 | C6   | DT | 8 | 3.312  | 3.891 | 5.380  | 1.00 | 0.00 |
| ATOM | 235 | H6   | DT | 8 | 4.063  | 4.667 | 5.412  | 1.00 | 0.00 |
| ATOM | 236 | C5   | DT | 8 | 2.009  | 4.249 | 5.330  | 1.00 | 0.00 |
| ATOM | 237 | C7   | DT | 8 | 1.590  | 5.734 | 5.370  | 1.00 | 0.00 |

|      |     |      |    |    |        |        |        |      |      |
|------|-----|------|----|----|--------|--------|--------|------|------|
| ATOM | 238 | H71  | DT | 8  | 2.029  | 6.259  | 4.522  | 1.00 | 0.00 |
| ATOM | 239 | H72  | DT | 8  | 0.504  | 5.807  | 5.319  | 1.00 | 0.00 |
| ATOM | 240 | H73  | DT | 8  | 1.941  | 6.186  | 6.298  | 1.00 | 0.00 |
| ATOM | 241 | C4   | DT | 8  | 1.066  | 3.186  | 5.250  | 1.00 | 0.00 |
| ATOM | 242 | O4   | DT | 8  | -0.159 | 3.366  | 5.200  | 1.00 | 0.00 |
| ATOM | 243 | N3   | DT | 8  | 1.581  | 1.884  | 5.220  | 1.00 | 0.00 |
| ATOM | 244 | H3   | DT | 8  | 0.881  | 1.050  | 5.160  | 1.00 | 0.00 |
| ATOM | 245 | C2   | DT | 8  | 2.914  | 1.569  | 5.270  | 1.00 | 0.00 |
| ATOM | 246 | O2   | DT | 8  | 3.284  | 0.415  | 5.250  | 1.00 | 0.00 |
| ATOM | 247 | C3'  | DT | 8  | 7.306  | 1.781  | 4.750  | 1.00 | 0.00 |
| ATOM | 248 | H3'  | DT | 8  | 7.945  | 1.627  | 3.880  | 1.00 | 0.00 |
| ATOM | 249 | C2'  | DT | 8  | 5.841  | 1.576  | 4.350  | 1.00 | 0.00 |
| ATOM | 250 | H2'  | DT | 8  | 5.745  | 1.657  | 3.267  | 1.00 | 0.00 |
| ATOM | 251 | H2'' | DT | 8  | 5.511  | 0.588  | 4.671  | 1.00 | 0.00 |
| ATOM | 252 | O3'  | DT | 8  | 7.642  | 0.857  | 5.760  | 1.00 | 0.00 |
| ATOM | 253 | P    | DC | 9  | 8.950  | -0.062 | 5.600  | 1.00 | 0.00 |
| ATOM | 254 | OP1  | DC | 9  | 9.165  | -0.528 | 4.240  | 1.00 | 0.00 |
| ATOM | 255 | OP2  | DC | 9  | 10.163 | 0.586  | 6.090  | 1.00 | 0.00 |
| ATOM | 256 | O5'  | DC | 9  | 8.582  | -1.298 | 6.550  | 1.00 | 0.00 |
| ATOM | 257 | C5'  | DC | 9  | 8.940  | -1.272 | 7.940  | 1.00 | 0.00 |
| ATOM | 258 | H5'  | DC | 9  | 9.156  | -0.231 | 8.179  | 1.00 | 0.00 |
| ATOM | 259 | H5'' | DC | 9  | 9.792  | -1.930 | 8.109  | 1.00 | 0.00 |
| ATOM | 260 | C4'  | DC | 9  | 7.778  | -1.739 | 8.770  | 1.00 | 0.00 |
| ATOM | 261 | H4'  | DC | 9  | 8.218  | -2.016 | 9.728  | 1.00 | 0.00 |
| ATOM | 262 | O4'  | DC | 9  | 6.803  | -0.715 | 9.100  | 1.00 | 0.00 |
| ATOM | 263 | C1'  | DC | 9  | 5.480  | -1.245 | 8.950  | 1.00 | 0.00 |
| ATOM | 264 | H1'  | DC | 9  | 5.069  | -1.755 | 9.821  | 1.00 | 0.00 |
| ATOM | 265 | N1   | DC | 9  | 4.569  | -0.112 | 8.750  | 1.00 | 0.00 |
| ATOM | 266 | C6   | DC | 9  | 5.000  | 1.191  | 8.780  | 1.00 | 0.00 |
| ATOM | 267 | H6   | DC | 9  | 6.061  | 1.379  | 8.847  | 1.00 | 0.00 |
| ATOM | 268 | C5   | DC | 9  | 4.160  | 2.230  | 8.730  | 1.00 | 0.00 |
| ATOM | 269 | H5   | DC | 9  | 4.558  | 3.245  | 8.744  | 1.00 | 0.00 |
| ATOM | 270 | C4   | DC | 9  | 2.746  | 1.937  | 8.650  | 1.00 | 0.00 |
| ATOM | 271 | N4   | DC | 9  | 1.896  | 2.954  | 8.600  | 1.00 | 0.00 |
| ATOM | 272 | H41  | DC | 9  | 0.911  | 2.740  | 8.544  | 1.00 | 0.00 |
| ATOM | 273 | H42  | DC | 9  | 2.238  | 3.904  | 8.618  | 1.00 | 0.00 |
| ATOM | 274 | N3   | DC | 9  | 2.331  | 0.686  | 8.620  | 1.00 | 0.00 |
| ATOM | 275 | C2   | DC | 9  | 3.181  | -0.351 | 8.670  | 1.00 | 0.00 |
| ATOM | 276 | O2   | DC | 9  | 2.789  | -1.527 | 8.640  | 1.00 | 0.00 |
| ATOM | 277 | C3'  | DC | 9  | 6.958  | -2.854 | 8.150  | 1.00 | 0.00 |
| ATOM | 278 | H3'  | DC | 9  | 7.384  | -3.354 | 7.280  | 1.00 | 0.00 |
| ATOM | 279 | C2'  | DC | 9  | 5.652  | -2.158 | 7.750  | 1.00 | 0.00 |
| ATOM | 280 | H2'  | DC | 9  | 5.622  | -2.035 | 6.667  | 1.00 | 0.00 |
| ATOM | 281 | H2'' | DC | 9  | 4.804  | -2.764 | 8.070  | 1.00 | 0.00 |
| ATOM | 282 | O3'  | DC | 9  | 6.686  | -3.798 | 9.160  | 1.00 | 0.00 |
| ATOM | 283 | P    | DG | 10 | 7.204  | -5.311 | 9.000  | 1.00 | 0.00 |
| ATOM | 284 | OP1  | DG | 10 | 7.104  | -5.814 | 7.640  | 1.00 | 0.00 |
| ATOM | 285 | OP2  | DG | 10 | 8.567  | -5.500 | 9.490  | 1.00 | 0.00 |
| ATOM | 286 | O5'  | DG | 10 | 6.180  | -6.095 | 9.950  | 1.00 | 0.00 |
| ATOM | 287 | C5'  | DG | 10 | 6.485  | -6.284 | 11.340 | 1.00 | 0.00 |
| ATOM | 288 | H5'  | DG | 10 | 7.272  | -5.569 | 11.579 | 1.00 | 0.00 |
| ATOM | 289 | H5'' | DG | 10 | 6.787  | -7.318 | 11.509 | 1.00 | 0.00 |
| ATOM | 290 | C4'  | DG | 10 | 5.271  | -5.978 | 12.170 | 1.00 | 0.00 |
| ATOM | 291 | H4'  | DG | 10 | 5.464  | -6.461 | 13.128 | 1.00 | 0.00 |
| ATOM | 292 | O4'  | DG | 10 | 5.083  | -4.577 | 12.500 | 1.00 | 0.00 |
| ATOM | 293 | C1'  | DG | 10 | 3.702  | -4.229 | 12.350 | 1.00 | 0.00 |
| ATOM | 294 | H1'  | DG | 10 | 3.049  | -4.404 | 13.205 | 1.00 | 0.00 |
| ATOM | 295 | N9   | DG | 10 | 3.630  | -2.776 | 12.150 | 1.00 | 0.00 |
| ATOM | 296 | C8   | DG | 10 | 4.698  | -1.907 | 12.180 | 1.00 | 0.00 |
| ATOM | 297 | H8   | DG | 10 | 5.696  | -2.313 | 12.250 | 1.00 | 0.00 |

|      |     |      |     |    |        |        |        |      |      |
|------|-----|------|-----|----|--------|--------|--------|------|------|
| ATOM | 298 | N7   | DG  | 10 | 4.385  | -0.632 | 12.120 | 1.00 | 0.00 |
| ATOM | 299 | C5   | DG  | 10 | 2.986  | -0.668 | 12.050 | 1.00 | 0.00 |
| ATOM | 300 | C6   | DG  | 10 | 2.036  | 0.425  | 11.960 | 1.00 | 0.00 |
| ATOM | 301 | O6   | DG  | 10 | 2.313  | 1.613  | 11.940 | 1.00 | 0.00 |
| ATOM | 302 | N1   | DG  | 10 | 0.728  | -0.047 | 11.910 | 1.00 | 0.00 |
| ATOM | 303 | H1   | DG  | 10 | 0.007  | 0.644  | 11.855 | 1.00 | 0.00 |
| ATOM | 304 | C2   | DG  | 10 | 0.339  | -1.369 | 11.930 | 1.00 | 0.00 |
| ATOM | 305 | N2   | DG  | 10 | -0.960 | -1.640 | 11.870 | 1.00 | 0.00 |
| ATOM | 306 | H21  | DG  | 10 | -1.718 | -0.974 | 11.821 | 1.00 | 0.00 |
| ATOM | 307 | H22  | DG  | 10 | -1.219 | -2.616 | 11.895 | 1.00 | 0.00 |
| ATOM | 308 | N3   | DG  | 10 | 1.242  | -2.386 | 12.010 | 1.00 | 0.00 |
| ATOM | 309 | C4   | DG  | 10 | 2.553  | -2.075 | 12.070 | 1.00 | 0.00 |
| ATOM | 310 | C3'  | DG  | 10 | 3.952  | -6.398 | 11.550 | 1.00 | 0.00 |
| ATOM | 311 | H3'  | DG  | 10 | 4.003  | -7.053 | 10.680 | 1.00 | 0.00 |
| ATOM | 312 | C2'  | DG  | 10 | 3.304  | -5.068 | 11.150 | 1.00 | 0.00 |
| ATOM | 313 | H2'  | DG  | 10 | 3.351  | -4.951 | 10.067 | 1.00 | 0.00 |
| ATOM | 314 | H2'' | DG  | 10 | 2.262  | -5.060 | 11.471 | 1.00 | 0.00 |
| ATOM | 315 | O3'  | DG  | 10 | 3.177  | -7.003 | 12.560 | 1.00 | 0.00 |
| ATOM | 316 | P    | DC  | 11 | 2.706  | -8.531 | 12.400 | 1.00 | 0.00 |
| ATOM | 317 | OP1  | DC  | 11 | 2.329  | -8.880 | 11.040 | 1.00 | 0.00 |
| ATOM | 318 | OP2  | DC  | 11 | 3.698  | -9.485 | 12.890 | 1.00 | 0.00 |
| ATOM | 319 | O5'  | DC  | 11 | 1.418  | -8.563 | 13.350 | 1.00 | 0.00 |
| ATOM | 320 | C5'  | DC  | 11 | 1.553  | -8.896 | 14.740 | 1.00 | 0.00 |
| ATOM | 321 | H5'  | DC  | 11 | 2.610  | -8.780 | 14.980 | 1.00 | 0.00 |
| ATOM | 322 | H5'' | DC  | 11 | 1.190  | -9.910 | 14.908 | 1.00 | 0.00 |
| ATOM | 323 | C4'  | DC  | 11 | 0.750  | -7.935 | 15.570 | 1.00 | 0.00 |
| ATOM | 324 | H4'  | DC  | 11 | 0.622  | -8.439 | 16.528 | 1.00 | 0.00 |
| ATOM | 325 | O4'  | DC  | 11 | 1.422  | -6.691 | 15.900 | 1.00 | 0.00 |
| ATOM | 326 | C1'  | DC  | 11 | 0.509  | -5.597 | 15.750 | 1.00 | 0.00 |
| ATOM | 327 | H1'  | DC  | 11 | -0.103 | -5.364 | 16.621 | 1.00 | 0.00 |
| ATOM | 328 | N1   | DC  | 11 | 1.306  | -4.380 | 15.550 | 1.00 | 0.00 |
| ATOM | 329 | C6   | DC  | 11 | 2.678  | -4.387 | 15.580 | 1.00 | 0.00 |
| ATOM | 330 | H6   | DC  | 11 | 3.184  | -5.339 | 15.647 | 1.00 | 0.00 |
| ATOM | 331 | C5   | DC  | 11 | 3.407  | -3.267 | 15.530 | 1.00 | 0.00 |
| ATOM | 332 | H5   | DC  | 11 | 4.495  | -3.331 | 15.544 | 1.00 | 0.00 |
| ATOM | 333 | C4   | DC  | 11 | 2.690  | -2.013 | 15.450 | 1.00 | 0.00 |
| ATOM | 334 | N4   | DC  | 11 | 3.395  | -0.891 | 15.400 | 1.00 | 0.00 |
| ATOM | 335 | H41  | DC  | 11 | 2.887  | -0.020 | 15.344 | 1.00 | 0.00 |
| ATOM | 336 | H42  | DC  | 11 | 4.404  | -0.923 | 15.418 | 1.00 | 0.00 |
| ATOM | 337 | N3   | DC  | 11 | 1.373  | -2.005 | 15.420 | 1.00 | 0.00 |
| ATOM | 338 | C2   | DC  | 11 | 0.649  | -3.134 | 15.470 | 1.00 | 0.00 |
| ATOM | 339 | O2   | DC  | 11 | -0.590 | -3.125 | 15.440 | 1.00 | 0.00 |
| ATOM | 340 | C3'  | DC  | 11 | -0.564 | -7.499 | 14.950 | 1.00 | 0.00 |
| ATOM | 341 | H3'  | DC  | 11 | -0.908 | -8.059 | 14.080 | 1.00 | 0.00 |
| ATOM | 342 | C2'  | DC  | 11 | -0.306 | -6.042 | 14.550 | 1.00 | 0.00 |
| ATOM | 343 | H2'  | DC  | 11 | -0.199 | -5.975 | 13.467 | 1.00 | 0.00 |
| ATOM | 344 | H2'' | DC  | 11 | -1.144 | -5.423 | 14.870 | 1.00 | 0.00 |
| ATOM | 345 | O3'  | DC  | 11 | -1.546 | -7.533 | 15.960 | 1.00 | 0.00 |
| ATOM | 346 | P    | DG3 | 12 | -2.825 | -8.492 | 15.800 | 1.00 | 0.00 |
| ATOM | 347 | OP1  | DG3 | 12 | -3.335 | -8.553 | 14.440 | 1.00 | 0.00 |
| ATOM | 348 | OP2  | DG3 | 12 | -2.583 | -9.847 | 16.290 | 1.00 | 0.00 |
| ATOM | 349 | O5'  | DG3 | 12 | -3.887 | -7.761 | 16.750 | 1.00 | 0.00 |
| ATOM | 350 | C5'  | DG3 | 12 | -3.973 | -8.109 | 18.140 | 1.00 | 0.00 |
| ATOM | 351 | H5'  | DG3 | 12 | -3.050 | -8.637 | 18.379 | 1.00 | 0.00 |
| ATOM | 352 | H5'' | DG3 | 12 | -4.863 | -8.715 | 18.309 | 1.00 | 0.00 |
| ATOM | 353 | C4'  | DG3 | 12 | -4.057 | -6.860 | 18.970 | 1.00 | 0.00 |
| ATOM | 354 | H4'  | DG3 | 12 | -4.456 | -7.193 | 19.928 | 1.00 | 0.00 |
| ATOM | 355 | O4'  | DG3 | 12 | -2.782 | -6.249 | 19.300 | 1.00 | 0.00 |
| ATOM | 356 | C1'  | DG3 | 12 | -2.878 | -4.827 | 19.150 | 1.00 | 0.00 |
| ATOM | 357 | H1'  | DG3 | 12 | -3.246 | -4.259 | 20.005 | 1.00 | 0.00 |

|      |     |      |     |    |        |        |        |      |      |
|------|-----|------|-----|----|--------|--------|--------|------|------|
| ATOM | 358 | N9   | DG3 | 12 | -1.518 | -4.311 | 18.950 | 1.00 | 0.00 |
| ATOM | 359 | C8   | DG3 | 12 | -0.362 | -5.057 | 18.980 | 1.00 | 0.00 |
| ATOM | 360 | H8   | DG3 | 12 | -0.439 | -6.132 | 19.050 | 1.00 | 0.00 |
| ATOM | 361 | N7   | DG3 | 12 | 0.754  | -4.365 | 18.920 | 1.00 | 0.00 |
| ATOM | 362 | C5   | DG3 | 12 | 0.288  | -3.046 | 18.850 | 1.00 | 0.00 |
| ATOM | 363 | C6   | DG3 | 12 | 1.034  | -1.805 | 18.760 | 1.00 | 0.00 |
| ATOM | 364 | O6   | DG3 | 12 | 2.249  | -1.701 | 18.740 | 1.00 | 0.00 |
| ATOM | 365 | N1   | DG3 | 12 | 0.180  | -0.707 | 18.710 | 1.00 | 0.00 |
| ATOM | 366 | H1   | DG3 | 12 | 0.615  | 0.192  | 18.655 | 1.00 | 0.00 |
| ATOM | 367 | C2   | DG3 | 12 | -1.197 | -0.745 | 18.730 | 1.00 | 0.00 |
| ATOM | 368 | N2   | DG3 | 12 | -1.856 | 0.406  | 18.670 | 1.00 | 0.00 |
| ATOM | 369 | H21  | DG3 | 12 | -1.457 | 1.333  | 18.621 | 1.00 | 0.00 |
| ATOM | 370 | H22  | DG3 | 12 | -2.864 | 0.350  | 18.695 | 1.00 | 0.00 |
| ATOM | 371 | N3   | DG3 | 12 | -1.885 | -1.919 | 18.810 | 1.00 | 0.00 |
| ATOM | 372 | C4   | DG3 | 12 | -1.184 | -3.069 | 18.870 | 1.00 | 0.00 |
| ATOM | 373 | C3'  | DG3 | 12 | -4.864 | -5.735 | 18.350 | 1.00 | 0.00 |
| ATOM | 374 | H3'  | DG3 | 12 | -5.471 | -5.986 | 17.480 | 1.00 | 0.00 |
| ATOM | 375 | C2'  | DG3 | 12 | -3.799 | -4.708 | 17.950 | 1.00 | 0.00 |
| ATOM | 376 | H2'  | DG3 | 12 | -3.673 | -4.717 | 16.867 | 1.00 | 0.00 |
| ATOM | 377 | H2'' | DG3 | 12 | -4.113 | -3.715 | 18.271 | 1.00 | 0.00 |
| ATOM | 378 | O3'  | DG3 | 12 | -5.679 | -5.185 | 19.360 | 1.00 | 0.00 |
| ATOM | 379 | HO3' | DG3 | 12 | -6.239 | -4.458 | 19.078 | 1.00 | 0.00 |
| TER  |     |      |     |    |        |        |        |      |      |
| ATOM | 380 | HO5' | DC5 | 13 | 1.879  | 9.095  | 21.303 | 1.00 | 0.00 |
| ATOM | 381 | O5'  | DC5 | 13 | 1.418  | 8.563  | 20.650 | 1.00 | 0.00 |
| ATOM | 382 | C5'  | DC5 | 13 | 1.553  | 8.896  | 19.260 | 1.00 | 0.00 |
| ATOM | 383 | H5'  | DC5 | 13 | 2.610  | 8.780  | 19.020 | 1.00 | 0.00 |
| ATOM | 384 | H5'' | DC5 | 13 | 1.239  | 9.915  | 19.033 | 1.00 | 0.00 |
| ATOM | 385 | C4'  | DC5 | 13 | 0.750  | 7.935  | 18.430 | 1.00 | 0.00 |
| ATOM | 386 | H4'  | DC5 | 13 | 0.622  | 8.439  | 17.472 | 1.00 | 0.00 |
| ATOM | 387 | O4'  | DC5 | 13 | 1.422  | 6.691  | 18.100 | 1.00 | 0.00 |
| ATOM | 388 | C1'  | DC5 | 13 | 0.509  | 5.597  | 18.250 | 1.00 | 0.00 |
| ATOM | 389 | H1'  | DC5 | 13 | -0.103 | 5.364  | 17.379 | 1.00 | 0.00 |
| ATOM | 390 | N1   | DC5 | 13 | 1.306  | 4.380  | 18.450 | 1.00 | 0.00 |
| ATOM | 391 | C6   | DC5 | 13 | 2.678  | 4.387  | 18.420 | 1.00 | 0.00 |
| ATOM | 392 | H6   | DC5 | 13 | 3.184  | 5.339  | 18.353 | 1.00 | 0.00 |
| ATOM | 393 | C5   | DC5 | 13 | 3.407  | 3.267  | 18.470 | 1.00 | 0.00 |
| ATOM | 394 | H5   | DC5 | 13 | 4.495  | 3.331  | 18.456 | 1.00 | 0.00 |
| ATOM | 395 | C4   | DC5 | 13 | 2.690  | 2.013  | 18.550 | 1.00 | 0.00 |
| ATOM | 396 | N4   | DC5 | 13 | 3.395  | 0.891  | 18.600 | 1.00 | 0.00 |
| ATOM | 397 | H41  | DC5 | 13 | 2.887  | 0.020  | 18.656 | 1.00 | 0.00 |
| ATOM | 398 | H42  | DC5 | 13 | 4.404  | 0.923  | 18.582 | 1.00 | 0.00 |
| ATOM | 399 | N3   | DC5 | 13 | 1.373  | 2.005  | 18.580 | 1.00 | 0.00 |
| ATOM | 400 | C2   | DC5 | 13 | 0.649  | 3.134  | 18.530 | 1.00 | 0.00 |
| ATOM | 401 | O2   | DC5 | 13 | -0.590 | 3.125  | 18.560 | 1.00 | 0.00 |
| ATOM | 402 | C3'  | DC5 | 13 | -0.564 | 7.499  | 19.050 | 1.00 | 0.00 |
| ATOM | 403 | H3'  | DC5 | 13 | -0.908 | 8.059  | 19.920 | 1.00 | 0.00 |
| ATOM | 404 | C2'  | DC5 | 13 | -0.306 | 6.042  | 19.450 | 1.00 | 0.00 |
| ATOM | 405 | H2'  | DC5 | 13 | -0.199 | 5.975  | 20.533 | 1.00 | 0.00 |
| ATOM | 406 | H2'' | DC5 | 13 | -1.144 | 5.423  | 19.130 | 1.00 | 0.00 |
| ATOM | 407 | O3'  | DC5 | 13 | -1.546 | 7.533  | 18.040 | 1.00 | 0.00 |
| ATOM | 408 | P    | DG  | 14 | -2.825 | 8.492  | 18.200 | 1.00 | 0.00 |
| ATOM | 409 | OP1  | DG  | 14 | -3.335 | 8.553  | 19.560 | 1.00 | 0.00 |
| ATOM | 410 | OP2  | DG  | 14 | -2.583 | 9.847  | 17.710 | 1.00 | 0.00 |
| ATOM | 411 | O5'  | DG  | 14 | -3.887 | 7.761  | 17.250 | 1.00 | 0.00 |
| ATOM | 412 | C5'  | DG  | 14 | -3.973 | 8.109  | 15.860 | 1.00 | 0.00 |
| ATOM | 413 | H5'  | DG  | 14 | -3.050 | 8.637  | 15.621 | 1.00 | 0.00 |
| ATOM | 414 | H5'' | DG  | 14 | -4.863 | 8.715  | 15.691 | 1.00 | 0.00 |
| ATOM | 415 | C4'  | DG  | 14 | -4.057 | 6.860  | 15.030 | 1.00 | 0.00 |
| ATOM | 416 | H4'  | DG  | 14 | -4.456 | 7.193  | 14.072 | 1.00 | 0.00 |

|      |     |      |    |    |         |        |        |      |      |
|------|-----|------|----|----|---------|--------|--------|------|------|
| ATOM | 417 | O4'  | DG | 14 | -2.782  | 6.249  | 14.700 | 1.00 | 0.00 |
| ATOM | 418 | C1'  | DG | 14 | -2.878  | 4.827  | 14.850 | 1.00 | 0.00 |
| ATOM | 419 | H1'  | DG | 14 | -3.246  | 4.259  | 13.995 | 1.00 | 0.00 |
| ATOM | 420 | N9   | DG | 14 | -1.518  | 4.311  | 15.050 | 1.00 | 0.00 |
| ATOM | 421 | C8   | DG | 14 | -0.362  | 5.057  | 15.020 | 1.00 | 0.00 |
| ATOM | 422 | H8   | DG | 14 | -0.439  | 6.132  | 14.950 | 1.00 | 0.00 |
| ATOM | 423 | N7   | DG | 14 | 0.754   | 4.365  | 15.080 | 1.00 | 0.00 |
| ATOM | 424 | C5   | DG | 14 | 0.288   | 3.046  | 15.150 | 1.00 | 0.00 |
| ATOM | 425 | C6   | DG | 14 | 1.034   | 1.805  | 15.240 | 1.00 | 0.00 |
| ATOM | 426 | O6   | DG | 14 | 2.249   | 1.701  | 15.260 | 1.00 | 0.00 |
| ATOM | 427 | N1   | DG | 14 | 0.180   | 0.707  | 15.290 | 1.00 | 0.00 |
| ATOM | 428 | H1   | DG | 14 | 0.615   | -0.192 | 15.345 | 1.00 | 0.00 |
| ATOM | 429 | C2   | DG | 14 | -1.197  | 0.745  | 15.270 | 1.00 | 0.00 |
| ATOM | 430 | N2   | DG | 14 | -1.856  | -0.406 | 15.330 | 1.00 | 0.00 |
| ATOM | 431 | H21  | DG | 14 | -1.457  | -1.333 | 15.379 | 1.00 | 0.00 |
| ATOM | 432 | H22  | DG | 14 | -2.864  | -0.350 | 15.305 | 1.00 | 0.00 |
| ATOM | 433 | N3   | DG | 14 | -1.885  | 1.919  | 15.190 | 1.00 | 0.00 |
| ATOM | 434 | C4   | DG | 14 | -1.184  | 3.069  | 15.130 | 1.00 | 0.00 |
| ATOM | 435 | C3'  | DG | 14 | -4.864  | 5.735  | 15.650 | 1.00 | 0.00 |
| ATOM | 436 | H3'  | DG | 14 | -5.471  | 5.986  | 16.520 | 1.00 | 0.00 |
| ATOM | 437 | C2'  | DG | 14 | -3.799  | 4.708  | 16.050 | 1.00 | 0.00 |
| ATOM | 438 | H2'  | DG | 14 | -3.673  | 4.717  | 17.133 | 1.00 | 0.00 |
| ATOM | 439 | H2'' | DG | 14 | -4.113  | 3.715  | 15.729 | 1.00 | 0.00 |
| ATOM | 440 | O3'  | DG | 14 | -5.679  | 5.185  | 14.640 | 1.00 | 0.00 |
| ATOM | 441 | P    | DC | 15 | -7.277  | 5.210  | 14.800 | 1.00 | 0.00 |
| ATOM | 442 | OP1  | DC | 15 | -7.725  | 4.959  | 16.160 | 1.00 | 0.00 |
| ATOM | 443 | OP2  | DC | 15 | -7.878  | 6.448  | 14.310 | 1.00 | 0.00 |
| ATOM | 444 | O5'  | DC | 15 | -7.706  | 3.995  | 13.850 | 1.00 | 0.00 |
| ATOM | 445 | C5'  | DC | 15 | -7.980  | 4.225  | 12.460 | 1.00 | 0.00 |
| ATOM | 446 | H5'  | DC | 15 | -7.544  | 5.194  | 12.220 | 1.00 | 0.00 |
| ATOM | 447 | H5'' | DC | 15 | -9.056  | 4.193  | 12.291 | 1.00 | 0.00 |
| ATOM | 448 | C4'  | DC | 15 | -7.315  | 3.165  | 11.630 | 1.00 | 0.00 |
| ATOM | 449 | H4'  | DC | 15 | -7.834  | 3.199  | 10.672 | 1.00 | 0.00 |
| ATOM | 450 | O4'  | DC | 15 | -5.924  | 3.420  | 11.300 | 1.00 | 0.00 |
| ATOM | 451 | C1'  | DC | 15 | -5.166  | 2.214  | 11.450 | 1.00 | 0.00 |
| ATOM | 452 | H1'  | DC | 15 | -5.134  | 1.560  | 10.579 | 1.00 | 0.00 |
| ATOM | 453 | N1   | DC | 15 | -3.762  | 2.595  | 11.650 | 1.00 | 0.00 |
| ATOM | 454 | C6   | DC | 15 | -3.345  | 3.903  | 11.620 | 1.00 | 0.00 |
| ATOM | 455 | H6   | DC | 15 | -4.093  | 4.679  | 11.553 | 1.00 | 0.00 |
| ATOM | 456 | C5   | DC | 15 | -2.054  | 4.250  | 11.670 | 1.00 | 0.00 |
| ATOM | 457 | H5   | DC | 15 | -1.779  | 5.305  | 11.656 | 1.00 | 0.00 |
| ATOM | 458 | C4   | DC | 15 | -1.083  | 3.181  | 11.750 | 1.00 | 0.00 |
| ATOM | 459 | N4   | DC | 15 | 0.202   | 3.504  | 11.800 | 1.00 | 0.00 |
| ATOM | 460 | H41  | DC | 15 | 0.873   | 2.752  | 11.856 | 1.00 | 0.00 |
| ATOM | 461 | H42  | DC | 15 | 0.484   | 4.474  | 11.782 | 1.00 | 0.00 |
| ATOM | 462 | N3   | DC | 15 | -1.483  | 1.925  | 11.780 | 1.00 | 0.00 |
| ATOM | 463 | C2   | DC | 15 | -2.780  | 1.585  | 11.730 | 1.00 | 0.00 |
| ATOM | 464 | O2   | DC | 15 | -3.154  | 0.404  | 11.760 | 1.00 | 0.00 |
| ATOM | 465 | C3'  | DC | 15 | -7.306  | 1.781  | 12.250 | 1.00 | 0.00 |
| ATOM | 466 | H3'  | DC | 15 | -7.945  | 1.627  | 13.120 | 1.00 | 0.00 |
| ATOM | 467 | C2'  | DC | 15 | -5.841  | 1.576  | 12.650 | 1.00 | 0.00 |
| ATOM | 468 | H2'  | DC | 15 | -5.745  | 1.657  | 13.733 | 1.00 | 0.00 |
| ATOM | 469 | H2'' | DC | 15 | -5.511  | 0.588  | 12.329 | 1.00 | 0.00 |
| ATOM | 470 | O3'  | DC | 15 | -7.642  | 0.857  | 11.240 | 1.00 | 0.00 |
| ATOM | 471 | P    | DG | 16 | -8.950  | -0.062 | 11.400 | 1.00 | 0.00 |
| ATOM | 472 | OP1  | DG | 16 | -9.165  | -0.528 | 12.760 | 1.00 | 0.00 |
| ATOM | 473 | OP2  | DG | 16 | -10.163 | 0.586  | 10.910 | 1.00 | 0.00 |
| ATOM | 474 | O5'  | DG | 16 | -8.582  | -1.298 | 10.450 | 1.00 | 0.00 |
| ATOM | 475 | C5'  | DG | 16 | -8.940  | -1.272 | 9.060  | 1.00 | 0.00 |
| ATOM | 476 | H5'  | DG | 16 | -9.156  | -0.231 | 8.821  | 1.00 | 0.00 |

|      |     |        |    |    |        |        |        |      |      |
|------|-----|--------|----|----|--------|--------|--------|------|------|
| ATOM | 477 | H5 ' ' | DG | 16 | -9.792 | -1.930 | 8.891  | 1.00 | 0.00 |
| ATOM | 478 | C4'    | DG | 16 | -7.778 | -1.739 | 8.230  | 1.00 | 0.00 |
| ATOM | 479 | H4'    | DG | 16 | -8.218 | -2.016 | 7.272  | 1.00 | 0.00 |
| ATOM | 480 | O4'    | DG | 16 | -6.803 | -0.715 | 7.900  | 1.00 | 0.00 |
| ATOM | 481 | C1'    | DG | 16 | -5.480 | -1.245 | 8.050  | 1.00 | 0.00 |
| ATOM | 482 | H1'    | DG | 16 | -5.054 | -1.771 | 7.195  | 1.00 | 0.00 |
| ATOM | 483 | N9     | DG | 16 | -4.569 | -0.112 | 8.250  | 1.00 | 0.00 |
| ATOM | 484 | C8     | DG | 16 | -4.922 | 1.218  | 8.220  | 1.00 | 0.00 |
| ATOM | 485 | H8     | DG | 16 | -5.968 | 1.476  | 8.150  | 1.00 | 0.00 |
| ATOM | 486 | N7     | DG | 16 | -3.919 | 2.066  | 8.280  | 1.00 | 0.00 |
| ATOM | 487 | C5     | DG | 16 | -2.808 | 1.215  | 8.350  | 1.00 | 0.00 |
| ATOM | 488 | C6     | DG | 16 | -1.397 | 1.541  | 8.440  | 1.00 | 0.00 |
| ATOM | 489 | O6     | DG | 16 | -0.923 | 2.665  | 8.460  | 1.00 | 0.00 |
| ATOM | 490 | N1     | DG | 16 | -0.617 | 0.390  | 8.490  | 1.00 | 0.00 |
| ATOM | 491 | H1     | DG | 16 | 0.372  | 0.526  | 8.545  | 1.00 | 0.00 |
| ATOM | 492 | C2     | DG | 16 | -1.079 | -0.908 | 8.470  | 1.00 | 0.00 |
| ATOM | 493 | N2     | DG | 16 | -0.187 | -1.891 | 8.530  | 1.00 | 0.00 |
| ATOM | 494 | H21    | DG | 16 | 0.818  | -1.798 | 8.579  | 1.00 | 0.00 |
| ATOM | 495 | H22    | DG | 16 | -0.551 | -2.833 | 8.505  | 1.00 | 0.00 |
| ATOM | 496 | N3     | DG | 16 | -2.407 | -1.200 | 8.390  | 1.00 | 0.00 |
| ATOM | 497 | C4     | DG | 16 | -3.285 | -0.178 | 8.330  | 1.00 | 0.00 |
| ATOM | 498 | C3'    | DG | 16 | -6.958 | -2.854 | 8.850  | 1.00 | 0.00 |
| ATOM | 499 | H3'    | DG | 16 | -7.384 | -3.354 | 9.720  | 1.00 | 0.00 |
| ATOM | 500 | C2'    | DG | 16 | -5.652 | -2.158 | 9.250  | 1.00 | 0.00 |
| ATOM | 501 | H2'    | DG | 16 | -5.622 | -2.035 | 10.333 | 1.00 | 0.00 |
| ATOM | 502 | H2 ' ' | DG | 16 | -4.804 | -2.764 | 8.930  | 1.00 | 0.00 |
| ATOM | 503 | O3'    | DG | 16 | -6.686 | -3.798 | 7.840  | 1.00 | 0.00 |
| ATOM | 504 | P      | DA | 17 | -7.204 | -5.311 | 8.000  | 1.00 | 0.00 |
| ATOM | 505 | OP1    | DA | 17 | -7.104 | -5.814 | 9.360  | 1.00 | 0.00 |
| ATOM | 506 | OP2    | DA | 17 | -8.567 | -5.500 | 7.510  | 1.00 | 0.00 |
| ATOM | 507 | O5'    | DA | 17 | -6.180 | -6.095 | 7.050  | 1.00 | 0.00 |
| ATOM | 508 | C5'    | DA | 17 | -6.485 | -6.284 | 5.660  | 1.00 | 0.00 |
| ATOM | 509 | H5'    | DA | 17 | -7.272 | -5.569 | 5.421  | 1.00 | 0.00 |
| ATOM | 510 | H5 ' ' | DA | 17 | -6.787 | -7.318 | 5.491  | 1.00 | 0.00 |
| ATOM | 511 | C4'    | DA | 17 | -5.271 | -5.978 | 4.830  | 1.00 | 0.00 |
| ATOM | 512 | H4'    | DA | 17 | -5.464 | -6.461 | 3.872  | 1.00 | 0.00 |
| ATOM | 513 | O4'    | DA | 17 | -5.083 | -4.577 | 4.500  | 1.00 | 0.00 |
| ATOM | 514 | C1'    | DA | 17 | -3.702 | -4.229 | 4.650  | 1.00 | 0.00 |
| ATOM | 515 | H1'    | DA | 17 | -2.982 | -4.402 | 3.850  | 1.00 | 0.00 |
| ATOM | 516 | N9     | DA | 17 | -3.630 | -2.776 | 4.850  | 1.00 | 0.00 |
| ATOM | 517 | C8     | DA | 17 | -4.698 | -1.879 | 4.820  | 1.00 | 0.00 |
| ATOM | 518 | H8     | DA | 17 | -5.715 | -2.243 | 4.802  | 1.00 | 0.00 |
| ATOM | 519 | N7     | DA | 17 | -4.327 | -0.608 | 4.880  | 1.00 | 0.00 |
| ATOM | 520 | C5     | DA | 17 | -2.971 | -0.691 | 4.950  | 1.00 | 0.00 |
| ATOM | 521 | C6     | DA | 17 | -1.962 | 0.335  | 5.030  | 1.00 | 0.00 |
| ATOM | 522 | N6     | DA | 17 | -2.276 | 1.666  | 5.060  | 1.00 | 0.00 |
| ATOM | 523 | H61    | DA | 17 | -1.542 | 2.357  | 5.116  | 1.00 | 0.00 |
| ATOM | 524 | H62    | DA | 17 | -3.242 | 1.958  | 5.026  | 1.00 | 0.00 |
| ATOM | 525 | N1     | DA | 17 | -0.698 | -0.052 | 5.090  | 1.00 | 0.00 |
| ATOM | 526 | C2     | DA | 17 | -0.410 | -1.359 | 5.050  | 1.00 | 0.00 |
| ATOM | 527 | H2     | DA | 17 | 0.619  | -1.685 | 5.074  | 1.00 | 0.00 |
| ATOM | 528 | N3     | DA | 17 | -1.248 | -2.417 | 4.980  | 1.00 | 0.00 |
| ATOM | 529 | C4     | DA | 17 | -2.507 | -1.973 | 4.930  | 1.00 | 0.00 |
| ATOM | 530 | C3'    | DA | 17 | -3.952 | -6.398 | 5.450  | 1.00 | 0.00 |
| ATOM | 531 | H3'    | DA | 17 | -4.003 | -7.053 | 6.320  | 1.00 | 0.00 |
| ATOM | 532 | C2'    | DA | 17 | -3.304 | -5.068 | 5.850  | 1.00 | 0.00 |
| ATOM | 533 | H2'    | DA | 17 | -3.351 | -4.951 | 6.933  | 1.00 | 0.00 |
| ATOM | 534 | H2 ' ' | DA | 17 | -2.262 | -5.060 | 5.529  | 1.00 | 0.00 |
| ATOM | 535 | O3'    | DA | 17 | -3.177 | -7.003 | 4.440  | 1.00 | 0.00 |
| ATOM | 536 | P      | DA | 18 | -2.706 | -8.531 | 4.600  | 1.00 | 0.00 |

|      |     |      |    |    |        |        |        |      |      |
|------|-----|------|----|----|--------|--------|--------|------|------|
| ATOM | 537 | OP1  | DA | 18 | -2.329 | -8.880 | 5.960  | 1.00 | 0.00 |
| ATOM | 538 | OP2  | DA | 18 | -3.698 | -9.485 | 4.110  | 1.00 | 0.00 |
| ATOM | 539 | O5'  | DA | 18 | -1.418 | -8.563 | 3.650  | 1.00 | 0.00 |
| ATOM | 540 | C5'  | DA | 18 | -1.553 | -8.896 | 2.260  | 1.00 | 0.00 |
| ATOM | 541 | H5'  | DA | 18 | -2.610 | -8.780 | 2.020  | 1.00 | 0.00 |
| ATOM | 542 | H5'' | DA | 18 | -1.190 | -9.910 | 2.092  | 1.00 | 0.00 |
| ATOM | 543 | C4'  | DA | 18 | -0.750 | -7.935 | 1.430  | 1.00 | 0.00 |
| ATOM | 544 | H4'  | DA | 18 | -0.622 | -8.439 | 0.472  | 1.00 | 0.00 |
| ATOM | 545 | O4'  | DA | 18 | -1.422 | -6.691 | 1.100  | 1.00 | 0.00 |
| ATOM | 546 | C1'  | DA | 18 | -0.509 | -5.597 | 1.250  | 1.00 | 0.00 |
| ATOM | 547 | H1'  | DA | 18 | 0.175  | -5.314 | 0.450  | 1.00 | 0.00 |
| ATOM | 548 | N9   | DA | 18 | -1.306 | -4.380 | 1.450  | 1.00 | 0.00 |
| ATOM | 549 | C8   | DA | 18 | -2.696 | -4.282 | 1.420  | 1.00 | 0.00 |
| ATOM | 550 | H8   | DA | 18 | -3.304 | -5.175 | 1.402  | 1.00 | 0.00 |
| ATOM | 551 | N7   | DA | 18 | -3.144 | -3.036 | 1.480  | 1.00 | 0.00 |
| ATOM | 552 | C5   | DA | 18 | -1.997 | -2.305 | 1.550  | 1.00 | 0.00 |
| ATOM | 553 | C6   | DA | 18 | -1.784 | -0.882 | 1.630  | 1.00 | 0.00 |
| ATOM | 554 | N6   | DA | 18 | -2.820 | 0.010  | 1.660  | 1.00 | 0.00 |
| ATOM | 555 | H61  | DA | 18 | -2.632 | 1.001  | 1.716  | 1.00 | 0.00 |
| ATOM | 556 | H62  | DA | 18 | -3.773 | -0.322 | 1.626  | 1.00 | 0.00 |
| ATOM | 557 | N1   | DA | 18 | -0.534 | -0.453 | 1.690  | 1.00 | 0.00 |
| ATOM | 558 | C2   | DA | 18 | 0.467  | -1.341 | 1.650  | 1.00 | 0.00 |
| ATOM | 559 | H2   | DA | 18 | 1.491  | -1.000 | 1.674  | 1.00 | 0.00 |
| ATOM | 560 | N3   | DA | 18 | 0.411  | -2.689 | 1.580  | 1.00 | 0.00 |
| ATOM | 561 | C4   | DA | 18 | -0.869 | -3.069 | 1.530  | 1.00 | 0.00 |
| ATOM | 562 | C3'  | DA | 18 | 0.564  | -7.499 | 2.050  | 1.00 | 0.00 |
| ATOM | 563 | H3'  | DA | 18 | 0.908  | -8.059 | 2.920  | 1.00 | 0.00 |
| ATOM | 564 | C2'  | DA | 18 | 0.306  | -6.042 | 2.450  | 1.00 | 0.00 |
| ATOM | 565 | H2'  | DA | 18 | 0.199  | -5.975 | 3.533  | 1.00 | 0.00 |
| ATOM | 566 | H2'' | DA | 18 | 1.144  | -5.423 | 2.130  | 1.00 | 0.00 |
| ATOM | 567 | O3'  | DA | 18 | 1.546  | -7.533 | 1.040  | 1.00 | 0.00 |
| ATOM | 568 | P    | DT | 19 | 2.825  | -8.492 | 1.200  | 1.00 | 0.00 |
| ATOM | 569 | OP1  | DT | 19 | 3.335  | -8.553 | 2.560  | 1.00 | 0.00 |
| ATOM | 570 | OP2  | DT | 19 | 2.583  | -9.847 | 0.710  | 1.00 | 0.00 |
| ATOM | 571 | O5'  | DT | 19 | 3.887  | -7.761 | 0.250  | 1.00 | 0.00 |
| ATOM | 572 | C5'  | DT | 19 | 3.973  | -8.109 | -1.140 | 1.00 | 0.00 |
| ATOM | 573 | H5'  | DT | 19 | 3.050  | -8.637 | -1.379 | 1.00 | 0.00 |
| ATOM | 574 | H5'' | DT | 19 | 4.863  | -8.715 | -1.309 | 1.00 | 0.00 |
| ATOM | 575 | C4'  | DT | 19 | 4.057  | -6.860 | -1.970 | 1.00 | 0.00 |
| ATOM | 576 | H4'  | DT | 19 | 4.456  | -7.193 | -2.928 | 1.00 | 0.00 |
| ATOM | 577 | O4'  | DT | 19 | 2.782  | -6.249 | -2.300 | 1.00 | 0.00 |
| ATOM | 578 | C1'  | DT | 19 | 2.878  | -4.827 | -2.150 | 1.00 | 0.00 |
| ATOM | 579 | H1'  | DT | 19 | 3.240  | -4.243 | -2.996 | 1.00 | 0.00 |
| ATOM | 580 | N1   | DT | 19 | 1.518  | -4.311 | -1.950 | 1.00 | 0.00 |
| ATOM | 581 | C6   | DT | 19 | 0.392  | -5.095 | -1.980 | 1.00 | 0.00 |
| ATOM | 582 | H6   | DT | 19 | 0.543  | -6.164 | -2.012 | 1.00 | 0.00 |
| ATOM | 583 | C5   | DT | 19 | -0.873 | -4.618 | -1.930 | 1.00 | 0.00 |
| ATOM | 584 | C7   | DT | 19 | -2.084 | -5.573 | -1.970 | 1.00 | 0.00 |
| ATOM | 585 | H71  | DT | 19 | -2.037 | -6.256 | -1.122 | 1.00 | 0.00 |
| ATOM | 586 | H72  | DT | 19 | -3.006 | -4.994 | -1.919 | 1.00 | 0.00 |
| ATOM | 587 | H73  | DT | 19 | -2.066 | -6.145 | -2.898 | 1.00 | 0.00 |
| ATOM | 588 | C4   | DT | 19 | -1.010 | -3.204 | -1.850 | 1.00 | 0.00 |
| ATOM | 589 | O4   | DT | 19 | -2.107 | -2.630 | -1.800 | 1.00 | 0.00 |
| ATOM | 590 | N3   | DT | 19 | 0.172  | -2.454 | -1.820 | 1.00 | 0.00 |
| ATOM | 591 | H3   | DT | 19 | 0.097  | -1.368 | -1.760 | 1.00 | 0.00 |
| ATOM | 592 | C2   | DT | 19 | 1.435  | -2.983 | -1.870 | 1.00 | 0.00 |
| ATOM | 593 | O2   | DT | 19 | 2.413  | -2.266 | -1.850 | 1.00 | 0.00 |
| ATOM | 594 | C3'  | DT | 19 | 4.864  | -5.735 | -1.350 | 1.00 | 0.00 |
| ATOM | 595 | H3'  | DT | 19 | 5.471  | -5.986 | -0.480 | 1.00 | 0.00 |
| ATOM | 596 | C2'  | DT | 19 | 3.799  | -4.708 | -0.950 | 1.00 | 0.00 |

|      |     |      |    |    |        |        |        |      |      |
|------|-----|------|----|----|--------|--------|--------|------|------|
| ATOM | 597 | H2'  | DT | 19 | 3.673  | -4.717 | 0.133  | 1.00 | 0.00 |
| ATOM | 598 | H2'' | DT | 19 | 4.113  | -3.715 | -1.271 | 1.00 | 0.00 |
| ATOM | 599 | O3'  | DT | 19 | 5.679  | -5.185 | -2.360 | 1.00 | 0.00 |
| ATOM | 600 | P    | DT | 20 | 7.277  | -5.210 | -2.200 | 1.00 | 0.00 |
| ATOM | 601 | OP1  | DT | 20 | 7.725  | -4.959 | -0.840 | 1.00 | 0.00 |
| ATOM | 602 | OP2  | DT | 20 | 7.878  | -6.448 | -2.690 | 1.00 | 0.00 |
| ATOM | 603 | O5'  | DT | 20 | 7.706  | -3.995 | -3.150 | 1.00 | 0.00 |
| ATOM | 604 | C5'  | DT | 20 | 7.980  | -4.225 | -4.540 | 1.00 | 0.00 |
| ATOM | 605 | H5'  | DT | 20 | 7.544  | -5.194 | -4.780 | 1.00 | 0.00 |
| ATOM | 606 | H5'' | DT | 20 | 9.056  | -4.193 | -4.709 | 1.00 | 0.00 |
| ATOM | 607 | C4'  | DT | 20 | 7.315  | -3.165 | -5.370 | 1.00 | 0.00 |
| ATOM | 608 | H4'  | DT | 20 | 7.834  | -3.199 | -6.328 | 1.00 | 0.00 |
| ATOM | 609 | O4'  | DT | 20 | 5.924  | -3.420 | -5.700 | 1.00 | 0.00 |
| ATOM | 610 | C1'  | DT | 20 | 5.166  | -2.214 | -5.550 | 1.00 | 0.00 |
| ATOM | 611 | H1'  | DT | 20 | 5.116  | -1.528 | -6.396 | 1.00 | 0.00 |
| ATOM | 612 | N1   | DT | 20 | 3.762  | -2.595 | -5.350 | 1.00 | 0.00 |
| ATOM | 613 | C6   | DT | 20 | 3.312  | -3.891 | -5.380 | 1.00 | 0.00 |
| ATOM | 614 | H6   | DT | 20 | 4.063  | -4.667 | -5.412 | 1.00 | 0.00 |
| ATOM | 615 | C5   | DT | 20 | 2.009  | -4.249 | -5.330 | 1.00 | 0.00 |
| ATOM | 616 | C7   | DT | 20 | 1.590  | -5.734 | -5.370 | 1.00 | 0.00 |
| ATOM | 617 | H71  | DT | 20 | 2.029  | -6.259 | -4.522 | 1.00 | 0.00 |
| ATOM | 618 | H72  | DT | 20 | 0.504  | -5.807 | -5.319 | 1.00 | 0.00 |
| ATOM | 619 | H73  | DT | 20 | 1.941  | -6.186 | -6.298 | 1.00 | 0.00 |
| ATOM | 620 | C4   | DT | 20 | 1.066  | -3.186 | -5.250 | 1.00 | 0.00 |
| ATOM | 621 | O4   | DT | 20 | -0.159 | -3.366 | -5.200 | 1.00 | 0.00 |
| ATOM | 622 | N3   | DT | 20 | 1.581  | -1.884 | -5.220 | 1.00 | 0.00 |
| ATOM | 623 | H3   | DT | 20 | 0.881  | -1.050 | -5.160 | 1.00 | 0.00 |
| ATOM | 624 | C2   | DT | 20 | 2.914  | -1.569 | -5.270 | 1.00 | 0.00 |
| ATOM | 625 | O2   | DT | 20 | 3.284  | -0.415 | -5.250 | 1.00 | 0.00 |
| ATOM | 626 | C3'  | DT | 20 | 7.306  | -1.781 | -4.750 | 1.00 | 0.00 |
| ATOM | 627 | H3'  | DT | 20 | 7.945  | -1.627 | -3.880 | 1.00 | 0.00 |
| ATOM | 628 | C2'  | DT | 20 | 5.841  | -1.576 | -4.350 | 1.00 | 0.00 |
| ATOM | 629 | H2'  | DT | 20 | 5.745  | -1.657 | -3.267 | 1.00 | 0.00 |
| ATOM | 630 | H2'' | DT | 20 | 5.511  | -0.588 | -4.671 | 1.00 | 0.00 |
| ATOM | 631 | O3'  | DT | 20 | 7.642  | -0.857 | -5.760 | 1.00 | 0.00 |
| ATOM | 632 | P    | DC | 21 | 8.950  | 0.062  | -5.600 | 1.00 | 0.00 |
| ATOM | 633 | OP1  | DC | 21 | 9.165  | 0.528  | -4.240 | 1.00 | 0.00 |
| ATOM | 634 | OP2  | DC | 21 | 10.163 | -0.586 | -6.090 | 1.00 | 0.00 |
| ATOM | 635 | O5'  | DC | 21 | 8.582  | 1.298  | -6.550 | 1.00 | 0.00 |
| ATOM | 636 | C5'  | DC | 21 | 8.940  | 1.272  | -7.940 | 1.00 | 0.00 |
| ATOM | 637 | H5'  | DC | 21 | 9.156  | 0.231  | -8.179 | 1.00 | 0.00 |
| ATOM | 638 | H5'' | DC | 21 | 9.792  | 1.930  | -8.109 | 1.00 | 0.00 |
| ATOM | 639 | C4'  | DC | 21 | 7.778  | 1.739  | -8.770 | 1.00 | 0.00 |
| ATOM | 640 | H4'  | DC | 21 | 8.218  | 2.016  | -9.728 | 1.00 | 0.00 |
| ATOM | 641 | O4'  | DC | 21 | 6.803  | 0.715  | -9.100 | 1.00 | 0.00 |
| ATOM | 642 | C1'  | DC | 21 | 5.480  | 1.245  | -8.950 | 1.00 | 0.00 |
| ATOM | 643 | H1'  | DC | 21 | 5.069  | 1.755  | -9.821 | 1.00 | 0.00 |
| ATOM | 644 | N1   | DC | 21 | 4.569  | 0.112  | -8.750 | 1.00 | 0.00 |
| ATOM | 645 | C6   | DC | 21 | 5.000  | -1.191 | -8.780 | 1.00 | 0.00 |
| ATOM | 646 | H6   | DC | 21 | 6.061  | -1.379 | -8.847 | 1.00 | 0.00 |
| ATOM | 647 | C5   | DC | 21 | 4.160  | -2.230 | -8.730 | 1.00 | 0.00 |
| ATOM | 648 | H5   | DC | 21 | 4.558  | -3.245 | -8.744 | 1.00 | 0.00 |
| ATOM | 649 | C4   | DC | 21 | 2.746  | -1.937 | -8.650 | 1.00 | 0.00 |
| ATOM | 650 | N4   | DC | 21 | 1.896  | -2.954 | -8.600 | 1.00 | 0.00 |
| ATOM | 651 | H41  | DC | 21 | 0.911  | -2.740 | -8.544 | 1.00 | 0.00 |
| ATOM | 652 | H42  | DC | 21 | 2.238  | -3.904 | -8.618 | 1.00 | 0.00 |
| ATOM | 653 | N3   | DC | 21 | 2.331  | -0.686 | -8.620 | 1.00 | 0.00 |
| ATOM | 654 | C2   | DC | 21 | 3.181  | 0.351  | -8.670 | 1.00 | 0.00 |
| ATOM | 655 | O2   | DC | 21 | 2.789  | 1.527  | -8.640 | 1.00 | 0.00 |
| ATOM | 656 | C3'  | DC | 21 | 6.958  | 2.854  | -8.150 | 1.00 | 0.00 |



|      |     |      |    |    |        |        |         |      |      |
|------|-----|------|----|----|--------|--------|---------|------|------|
| ATOM | 657 | H3'  | DC | 21 | 7.384  | 3.354  | -7.280  | 1.00 | 0.00 |
| ATOM | 658 | C2'  | DC | 21 | 5.652  | 2.158  | -7.750  | 1.00 | 0.00 |
| ATOM | 659 | H2'  | DC | 21 | 5.622  | 2.035  | -6.667  | 1.00 | 0.00 |
| ATOM | 660 | H2'' | DC | 21 | 4.804  | 2.764  | -8.070  | 1.00 | 0.00 |
| ATOM | 661 | O3'  | DC | 21 | 6.686  | 3.798  | -9.160  | 1.00 | 0.00 |
| ATOM | 662 | P    | DG | 22 | 7.204  | 5.311  | -9.000  | 1.00 | 0.00 |
| ATOM | 663 | OP1  | DG | 22 | 7.104  | 5.814  | -7.640  | 1.00 | 0.00 |
| ATOM | 664 | OP2  | DG | 22 | 8.567  | 5.500  | -9.490  | 1.00 | 0.00 |
| ATOM | 665 | O5'  | DG | 22 | 6.180  | 6.095  | -9.950  | 1.00 | 0.00 |
| ATOM | 666 | C5'  | DG | 22 | 6.485  | 6.284  | -11.340 | 1.00 | 0.00 |
| ATOM | 667 | H5'  | DG | 22 | 7.272  | 5.569  | -11.579 | 1.00 | 0.00 |
| ATOM | 668 | H5'' | DG | 22 | 6.787  | 7.318  | -11.509 | 1.00 | 0.00 |
| ATOM | 669 | C4'  | DG | 22 | 5.271  | 5.978  | -12.170 | 1.00 | 0.00 |
| ATOM | 670 | H4'  | DG | 22 | 5.464  | 6.461  | -13.128 | 1.00 | 0.00 |
| ATOM | 671 | O4'  | DG | 22 | 5.083  | 4.577  | -12.500 | 1.00 | 0.00 |
| ATOM | 672 | C1'  | DG | 22 | 3.702  | 4.229  | -12.350 | 1.00 | 0.00 |
| ATOM | 673 | H1'  | DG | 22 | 3.049  | 4.404  | -13.205 | 1.00 | 0.00 |
| ATOM | 674 | N9   | DG | 22 | 3.630  | 2.776  | -12.150 | 1.00 | 0.00 |
| ATOM | 675 | C8   | DG | 22 | 4.698  | 1.907  | -12.180 | 1.00 | 0.00 |
| ATOM | 676 | H8   | DG | 22 | 5.696  | 2.313  | -12.250 | 1.00 | 0.00 |
| ATOM | 677 | N7   | DG | 22 | 4.385  | 0.632  | -12.120 | 1.00 | 0.00 |
| ATOM | 678 | C5   | DG | 22 | 2.986  | 0.668  | -12.050 | 1.00 | 0.00 |
| ATOM | 679 | C6   | DG | 22 | 2.036  | -0.425 | -11.960 | 1.00 | 0.00 |
| ATOM | 680 | O6   | DG | 22 | 2.313  | -1.613 | -11.940 | 1.00 | 0.00 |
| ATOM | 681 | N1   | DG | 22 | 0.728  | 0.047  | -11.910 | 1.00 | 0.00 |
| ATOM | 682 | H1   | DG | 22 | 0.007  | -0.644 | -11.855 | 1.00 | 0.00 |
| ATOM | 683 | C2   | DG | 22 | 0.339  | 1.369  | -11.930 | 1.00 | 0.00 |
| ATOM | 684 | N2   | DG | 22 | -0.960 | 1.640  | -11.870 | 1.00 | 0.00 |
| ATOM | 685 | H21  | DG | 22 | -1.718 | 0.974  | -11.821 | 1.00 | 0.00 |
| ATOM | 686 | H22  | DG | 22 | -1.219 | 2.616  | -11.895 | 1.00 | 0.00 |
| ATOM | 687 | N3   | DG | 22 | 1.242  | 2.386  | -12.010 | 1.00 | 0.00 |
| ATOM | 688 | C4   | DG | 22 | 2.553  | 2.075  | -12.070 | 1.00 | 0.00 |
| ATOM | 689 | C3'  | DG | 22 | 3.952  | 6.398  | -11.550 | 1.00 | 0.00 |
| ATOM | 690 | H3'  | DG | 22 | 4.003  | 7.053  | -10.680 | 1.00 | 0.00 |
| ATOM | 691 | C2'  | DG | 22 | 3.304  | 5.068  | -11.150 | 1.00 | 0.00 |
| ATOM | 692 | H2'  | DG | 22 | 3.351  | 4.951  | -10.067 | 1.00 | 0.00 |
| ATOM | 693 | H2'' | DG | 22 | 2.262  | 5.060  | -11.471 | 1.00 | 0.00 |
| ATOM | 694 | O3'  | DG | 22 | 3.177  | 7.003  | -12.560 | 1.00 | 0.00 |
| ATOM | 695 | P    | DC | 23 | 2.706  | 8.531  | -12.400 | 1.00 | 0.00 |
| ATOM | 696 | OP1  | DC | 23 | 2.329  | 8.880  | -11.040 | 1.00 | 0.00 |
| ATOM | 697 | OP2  | DC | 23 | 3.698  | 9.485  | -12.890 | 1.00 | 0.00 |
| ATOM | 698 | O5'  | DC | 23 | 1.418  | 8.563  | -13.350 | 1.00 | 0.00 |
| ATOM | 699 | C5'  | DC | 23 | 1.553  | 8.896  | -14.740 | 1.00 | 0.00 |
| ATOM | 700 | H5'  | DC | 23 | 2.610  | 8.780  | -14.980 | 1.00 | 0.00 |
| ATOM | 701 | H5'' | DC | 23 | 1.190  | 9.910  | -14.908 | 1.00 | 0.00 |
| ATOM | 702 | C4'  | DC | 23 | 0.750  | 7.935  | -15.570 | 1.00 | 0.00 |
| ATOM | 703 | H4'  | DC | 23 | 0.622  | 8.439  | -16.528 | 1.00 | 0.00 |
| ATOM | 704 | O4'  | DC | 23 | 1.422  | 6.691  | -15.900 | 1.00 | 0.00 |
| ATOM | 705 | C1'  | DC | 23 | 0.509  | 5.597  | -15.750 | 1.00 | 0.00 |
| ATOM | 706 | H1'  | DC | 23 | -0.103 | 5.364  | -16.621 | 1.00 | 0.00 |
| ATOM | 707 | N1   | DC | 23 | 1.306  | 4.380  | -15.550 | 1.00 | 0.00 |
| ATOM | 708 | C6   | DC | 23 | 2.678  | 4.387  | -15.580 | 1.00 | 0.00 |
| ATOM | 709 | H6   | DC | 23 | 3.184  | 5.339  | -15.647 | 1.00 | 0.00 |
| ATOM | 710 | C5   | DC | 23 | 3.407  | 3.267  | -15.530 | 1.00 | 0.00 |
| ATOM | 711 | H5   | DC | 23 | 4.495  | 3.331  | -15.544 | 1.00 | 0.00 |
| ATOM | 712 | C4   | DC | 23 | 2.690  | 2.013  | -15.450 | 1.00 | 0.00 |
| ATOM | 713 | N4   | DC | 23 | 3.395  | 0.891  | -15.400 | 1.00 | 0.00 |
| ATOM | 714 | H41  | DC | 23 | 2.887  | 0.020  | -15.344 | 1.00 | 0.00 |
| ATOM | 715 | H42  | DC | 23 | 4.404  | 0.923  | -15.418 | 1.00 | 0.00 |
| ATOM | 716 | N3   | DC | 23 | 1.373  | 2.005  | -15.420 | 1.00 | 0.00 |



## IIRa

|      |    |      |     |   |         |        |         |      |      |
|------|----|------|-----|---|---------|--------|---------|------|------|
| ATOM | 1  | HO5' | DC5 | 1 | -10.397 | -1.488 | -19.095 | 1.00 | 0.00 |
| ATOM | 2  | O5'  | DC5 | 1 | -9.812  | -2.249 | -19.092 | 1.00 | 0.00 |
| ATOM | 3  | C5'  | DC5 | 1 | -9.272  | -2.710 | -17.837 | 1.00 | 0.00 |
| ATOM | 4  | H5'  | DC5 | 1 | -10.048 | -2.933 | -17.105 | 1.00 | 0.00 |
| ATOM | 5  | H5'' | DC5 | 1 | -8.682  | -1.861 | -17.492 | 1.00 | 0.00 |
| ATOM | 6  | C4'  | DC5 | 1 | -8.358  | -3.930 | -17.990 | 1.00 | 0.00 |
| ATOM | 7  | H4'  | DC5 | 1 | -8.857  | -4.760 | -18.491 | 1.00 | 0.00 |
| ATOM | 8  | O4'  | DC5 | 1 | -7.312  | -3.533 | -18.902 | 1.00 | 0.00 |
| ATOM | 9  | C1'  | DC5 | 1 | -6.194  | -4.379 | -18.700 | 1.00 | 0.00 |
| ATOM | 10 | H1'  | DC5 | 1 | -6.134  | -5.039 | -19.566 | 1.00 | 0.00 |
| ATOM | 11 | N1   | DC5 | 1 | -4.905  | -3.692 | -18.700 | 1.00 | 0.00 |
| ATOM | 12 | C6   | DC5 | 1 | -3.780  | -4.470 | -18.700 | 1.00 | 0.00 |
| ATOM | 13 | H6   | DC5 | 1 | -3.860  | -5.547 | -18.700 | 1.00 | 0.00 |
| ATOM | 14 | C5   | DC5 | 1 | -2.530  | -3.893 | -18.700 | 1.00 | 0.00 |
| ATOM | 15 | H5   | DC5 | 1 | -1.631  | -4.510 | -18.700 | 1.00 | 0.00 |
| ATOM | 16 | C4   | DC5 | 1 | -2.497  | -2.516 | -18.700 | 1.00 | 0.00 |
| ATOM | 17 | N4   | DC5 | 1 | -1.341  | -1.867 | -18.700 | 1.00 | 0.00 |
| ATOM | 18 | H41  | DC5 | 1 | -1.369  | -0.857 | -18.700 | 1.00 | 0.00 |
| ATOM | 19 | H42  | DC5 | 1 | -0.470  | -2.378 | -18.700 | 1.00 | 0.00 |
| ATOM | 20 | N3   | DC5 | 1 | -3.630  | -1.765 | -18.700 | 1.00 | 0.00 |
| ATOM | 21 | C2   | DC5 | 1 | -4.856  | -2.348 | -18.700 | 1.00 | 0.00 |
| ATOM | 22 | O2   | DC5 | 1 | -5.884  | -1.680 | -18.700 | 1.00 | 0.00 |
| ATOM | 23 | C3'  | DC5 | 1 | -7.523  | -4.339 | -16.756 | 1.00 | 0.00 |
| ATOM | 24 | H3'  | DC5 | 1 | -7.121  | -3.447 | -16.276 | 1.00 | 0.00 |
| ATOM | 25 | C2'  | DC5 | 1 | -6.398  | -5.116 | -17.398 | 1.00 | 0.00 |
| ATOM | 26 | H2'  | DC5 | 1 | -5.817  | -5.621 | -16.626 | 1.00 | 0.00 |
| ATOM | 27 | H2'' | DC5 | 1 | -6.812  | -5.856 | -18.083 | 1.00 | 0.00 |
| ATOM | 28 | O3'  | DC5 | 1 | -8.176  | -5.168 | -15.772 | 1.00 | 0.00 |
| ATOM | 29 | P    | DG  | 2 | -8.286  | -6.780 | -15.839 | 1.00 | 0.00 |
| ATOM | 30 | OP1  | DG  | 2 | -9.095  | -7.240 | -14.693 | 1.00 | 0.00 |
| ATOM | 31 | OP2  | DG  | 2 | -8.827  | -7.146 | -17.169 | 1.00 | 0.00 |
| ATOM | 32 | O5'  | DG  | 2 | -6.797  | -7.425 | -15.692 | 1.00 | 0.00 |
| ATOM | 33 | C5'  | DG  | 2 | -6.091  | -7.498 | -14.437 | 1.00 | 0.00 |
| ATOM | 34 | H5'  | DG  | 2 | -6.603  | -8.123 | -13.705 | 1.00 | 0.00 |
| ATOM | 35 | H5'' | DG  | 2 | -6.061  | -6.510 | -13.978 | 1.00 | 0.00 |
| ATOM | 36 | C4'  | DG  | 2 | -4.645  | -7.983 | -14.590 | 1.00 | 0.00 |
| ATOM | 37 | H4'  | DG  | 2 | -4.583  | -8.949 | -15.091 | 1.00 | 0.00 |
| ATOM | 38 | O4'  | DG  | 2 | -4.010  | -7.062 | -15.502 | 1.00 | 0.00 |
| ATOM | 39 | C1'  | DG  | 2 | -2.610  | -7.123 | -15.300 | 1.00 | 0.00 |
| ATOM | 40 | H1'  | DG  | 2 | -2.185  | -7.633 | -16.165 | 1.00 | 0.00 |
| ATOM | 41 | N9   | DG  | 2 | -1.938  | -5.825 | -15.300 | 1.00 | 0.00 |
| ATOM | 42 | C8   | DG  | 2 | -0.580  | -5.605 | -15.300 | 1.00 | 0.00 |
| ATOM | 43 | H8   | DG  | 2 | 0.136   | -6.414 | -15.298 | 1.00 | 0.00 |
| ATOM | 44 | N7   | DG  | 2 | -0.290  | -4.296 | -15.300 | 1.00 | 0.00 |
| ATOM | 45 | C5   | DG  | 2 | -1.503  | -3.709 | -15.300 | 1.00 | 0.00 |
| ATOM | 46 | C6   | DG  | 2 | -1.849  | -2.349 | -15.300 | 1.00 | 0.00 |
| ATOM | 47 | O6   | DG  | 2 | -1.099  | -1.370 | -15.300 | 1.00 | 0.00 |
| ATOM | 48 | N1   | DG  | 2 | -3.210  | -2.169 | -15.300 | 1.00 | 0.00 |
| ATOM | 49 | H1   | DG  | 2 | -3.516  | -1.217 | -15.300 | 1.00 | 0.00 |
| ATOM | 50 | C2   | DG  | 2 | -4.169  | -3.135 | -15.300 | 1.00 | 0.00 |
| ATOM | 51 | N2   | DG  | 2 | -5.449  | -2.751 | -15.300 | 1.00 | 0.00 |
| ATOM | 52 | H21  | DG  | 2 | -5.799  | -1.804 | -15.288 | 1.00 | 0.00 |
| ATOM | 53 | H22  | DG  | 2 | -6.141  | -3.487 | -15.291 | 1.00 | 0.00 |
| ATOM | 54 | N3   | DG  | 2 | -3.850  | -4.427 | -15.300 | 1.00 | 0.00 |
| ATOM | 55 | C4   | DG  | 2 | -2.527  | -4.627 | -15.300 | 1.00 | 0.00 |
| ATOM | 56 | C3'  | DG  | 2 | -3.726  | -7.845 | -13.356 | 1.00 | 0.00 |
| ATOM | 57 | H3'  | DG  | 2 | -3.902  | -6.882 | -12.877 | 1.00 | 0.00 |

|      |     |      |    |   |        |         |         |      |      |
|------|-----|------|----|---|--------|---------|---------|------|------|
| ATOM | 58  | C2'  | DG | 2 | -2.358 | -7.845  | -13.998 | 1.00 | 0.00 |
| ATOM | 59  | H2'  | DG | 2 | -1.594 | -7.930  | -13.226 | 1.00 | 0.00 |
| ATOM | 60  | H2'' | DG | 2 | -2.277 | -8.689  | -14.683 | 1.00 | 0.00 |
| ATOM | 61  | O3'  | DG | 2 | -3.792 | -8.898  | -12.372 | 1.00 | 0.00 |
| ATOM | 62  | P    | DC | 3 | -2.967 | -10.287 | -12.439 | 1.00 | 0.00 |
| ATOM | 63  | OP1  | DC | 3 | -3.371 | -11.125 | -11.293 | 1.00 | 0.00 |
| ATOM | 64  | OP2  | DC | 3 | -3.204 | -10.896 | -13.769 | 1.00 | 0.00 |
| ATOM | 65  | O5'  | DC | 3 | -1.375 | -9.972  | -12.292 | 1.00 | 0.00 |
| ATOM | 66  | C5'  | DC | 3 | -0.753 | -9.631  | -11.037 | 1.00 | 0.00 |
| ATOM | 67  | H5'  | DC | 3 | -0.819 | -10.437 | -10.306 | 1.00 | 0.00 |
| ATOM | 68  | H5'' | DC | 3 | -1.291 | -8.801  | -10.578 | 1.00 | 0.00 |
| ATOM | 69  | C4'  | DC | 3 | 0.712  | -9.208  | -11.190 | 1.00 | 0.00 |
| ATOM | 70  | H4'  | DC | 3 | 1.311  | -9.969  | -11.691 | 1.00 | 0.00 |
| ATOM | 71  | O4'  | DC | 3 | 0.712  | -8.090  | -12.102 | 1.00 | 0.00 |
| ATOM | 72  | C1'  | DC | 3 | 1.899  | -7.344  | -11.900 | 1.00 | 0.00 |
| ATOM | 73  | H1'  | DC | 3 | 2.537  | -7.522  | -12.766 | 1.00 | 0.00 |
| ATOM | 74  | N1   | DC | 3 | 1.714  | -5.895  | -11.900 | 1.00 | 0.00 |
| ATOM | 75  | C6   | DC | 3 | 2.840  | -5.119  | -11.900 | 1.00 | 0.00 |
| ATOM | 76  | H6   | DC | 3 | 3.819  | -5.575  | -11.900 | 1.00 | 0.00 |
| ATOM | 77  | C5   | DC | 3 | 2.743  | -3.746  | -11.900 | 1.00 | 0.00 |
| ATOM | 78  | H5   | DC | 3 | 3.638  | -3.124  | -11.900 | 1.00 | 0.00 |
| ATOM | 79  | C4   | DC | 3 | 1.467  | -3.227  | -11.900 | 1.00 | 0.00 |
| ATOM | 80  | N4   | DC | 3 | 1.271  | -1.916  | -11.900 | 1.00 | 0.00 |
| ATOM | 81  | H41  | DC | 3 | 0.317  | -1.584  | -11.900 | 1.00 | 0.00 |
| ATOM | 82  | H42  | DC | 3 | 2.058  | -1.284  | -11.900 | 1.00 | 0.00 |
| ATOM | 83  | N3   | DC | 3 | 0.364  | -4.021  | -11.900 | 1.00 | 0.00 |
| ATOM | 84  | C2   | DC | 3 | 0.475  | -5.373  | -11.900 | 1.00 | 0.00 |
| ATOM | 85  | O2   | DC | 3 | -0.514 | -6.097  | -11.900 | 1.00 | 0.00 |
| ATOM | 86  | C3'  | DC | 3 | 1.391  | -8.573  | -9.956  | 1.00 | 0.00 |
| ATOM | 87  | H3'  | DC | 3 | 0.699  | -7.881  | -9.477  | 1.00 | 0.00 |
| ATOM | 88  | C2'  | DC | 3 | 2.516  | -7.796  | -10.598 | 1.00 | 0.00 |
| ATOM | 89  | H2'  | DC | 3 | 3.194  | -7.433  | -9.826  | 1.00 | 0.00 |
| ATOM | 90  | H2'' | DC | 3 | 3.061  | -8.445  | -11.284 | 1.00 | 0.00 |
| ATOM | 91  | O3'  | DC | 3 | 1.935  | -9.477  | -8.972  | 1.00 | 0.00 |
| ATOM | 92  | P    | DG | 4 | 3.403  | -10.151 | -9.039  | 1.00 | 0.00 |
| ATOM | 93  | OP1  | DG | 4 | 3.547  | -11.071 | -7.893  | 1.00 | 0.00 |
| ATOM | 94  | OP2  | DG | 4 | 3.553  | -10.787 | -10.369 | 1.00 | 0.00 |
| ATOM | 95  | O5'  | DG | 4 | 4.534  | -8.987  | -8.892  | 1.00 | 0.00 |
| ATOM | 96  | C5'  | DG | 4 | 4.852  | -8.353  | -7.637  | 1.00 | 0.00 |
| ATOM | 97  | H5'  | DG | 4 | 5.255  | -9.053  | -6.905  | 1.00 | 0.00 |
| ATOM | 98  | H5'' | DG | 4 | 3.938  | -7.975  | -7.178  | 1.00 | 0.00 |
| ATOM | 99  | C4'  | DG | 4 | 5.818  | -7.173  | -7.790  | 1.00 | 0.00 |
| ATOM | 100 | H4'  | DG | 4 | 6.743  | -7.458  | -8.291  | 1.00 | 0.00 |
| ATOM | 101 | O4'  | DG | 4 | 5.182  | -6.253  | -8.702  | 1.00 | 0.00 |
| ATOM | 102 | C1'  | DG | 4 | 5.735  | -4.965  | -8.500  | 1.00 | 0.00 |
| ATOM | 103 | H1'  | DG | 4 | 6.363  | -4.749  | -9.365  | 1.00 | 0.00 |
| ATOM | 104 | N9   | DG | 4 | 4.760  | -3.877  | -8.500  | 1.00 | 0.00 |
| ATOM | 105 | C8   | DG | 4 | 5.035  | -2.529  | -8.500  | 1.00 | 0.00 |
| ATOM | 106 | H8   | DG | 4 | 6.045  | -2.147  | -8.498  | 1.00 | 0.00 |
| ATOM | 107 | N7   | DG | 4 | 3.915  | -1.794  | -8.500  | 1.00 | 0.00 |
| ATOM | 108 | C5   | DG | 4 | 2.935  | -2.720  | -8.500  | 1.00 | 0.00 |
| ATOM | 109 | C6   | DG | 4 | 1.541  | -2.561  | -8.500  | 1.00 | 0.00 |
| ATOM | 110 | O6   | DG | 4 | 0.891  | -1.513  | -8.500  | 1.00 | 0.00 |
| ATOM | 111 | N1   | DG | 4 | 0.890  | -3.770  | -8.500  | 1.00 | 0.00 |
| ATOM | 112 | H1   | DG | 4 | -0.109 | -3.718  | -8.500  | 1.00 | 0.00 |
| ATOM | 113 | C2   | DG | 4 | 1.453  | -5.009  | -8.500  | 1.00 | 0.00 |
| ATOM | 114 | N2   | DG | 4 | 0.641  | -6.070  | -8.500  | 1.00 | 0.00 |
| ATOM | 115 | H21  | DG | 4 | -0.369 | -6.063  | -8.488  | 1.00 | 0.00 |
| ATOM | 116 | H22  | DG | 4 | 1.084  | -6.977  | -8.491  | 1.00 | 0.00 |
| ATOM | 117 | N3   | DG | 4 | 2.774  | -5.170  | -8.500  | 1.00 | 0.00 |

|      |     |      |    |   |        |        |        |      |      |
|------|-----|------|----|---|--------|--------|--------|------|------|
| ATOM | 118 | C4   | DG | 4 | 3.431  | -4.003 | -8.500 | 1.00 | 0.00 |
| ATOM | 119 | C3'  | DG | 4 | 6.015  | -6.265 | -6.556 | 1.00 | 0.00 |
| ATOM | 120 | H3'  | DG | 4 | 5.052  | -6.089 | -6.077 | 1.00 | 0.00 |
| ATOM | 121 | C2'  | DG | 4 | 6.500  | -4.986 | -7.198 | 1.00 | 0.00 |
| ATOM | 122 | H2'  | DG | 4 | 6.851  | -4.302 | -6.426 | 1.00 | 0.00 |
| ATOM | 123 | H2'' | DG | 4 | 7.317  | -5.210 | -7.883 | 1.00 | 0.00 |
| ATOM | 124 | O3'  | DG | 4 | 6.976  | -6.700 | -5.572 | 1.00 | 0.00 |
| ATOM | 125 | P    | DA | 5 | 8.567  | -6.420 | -5.639 | 1.00 | 0.00 |
| ATOM | 126 | OP1  | DA | 5 | 9.208  | -7.096 | -4.493 | 1.00 | 0.00 |
| ATOM | 127 | OP2  | DA | 5 | 9.052  | -6.858 | -6.969 | 1.00 | 0.00 |
| ATOM | 128 | O5'  | DA | 5 | 8.837  | -4.820 | -5.492 | 1.00 | 0.00 |
| ATOM | 129 | C5'  | DA | 5 | 8.739  | -4.117 | -4.237 | 1.00 | 0.00 |
| ATOM | 130 | H5'  | DA | 5 | 9.469  | -4.464 | -3.506 | 1.00 | 0.00 |
| ATOM | 131 | H5'' | DA | 5 | 7.773  | -4.325 | -3.778 | 1.00 | 0.00 |
| ATOM | 132 | C4'  | DA | 5 | 8.863  | -2.598 | -4.390 | 1.00 | 0.00 |
| ATOM | 133 | H4'  | DA | 5 | 9.786  | -2.307 | -4.891 | 1.00 | 0.00 |
| ATOM | 134 | O4'  | DA | 5 | 7.817  | -2.202 | -5.302 | 1.00 | 0.00 |
| ATOM | 135 | C1'  | DA | 5 | 7.541  | -0.827 | -5.100 | 1.00 | 0.00 |
| ATOM | 136 | H1'  | DA | 5 | 7.935  | -0.234 | -5.926 | 1.00 | 0.00 |
| ATOM | 137 | N9   | DA | 5 | 6.120  | -0.487 | -5.100 | 1.00 | 0.00 |
| ATOM | 138 | C8   | DA | 5 | 5.482  | 0.722  | -5.100 | 1.00 | 0.00 |
| ATOM | 139 | H8   | DA | 5 | 6.026  | 1.654  | -5.149 | 1.00 | 0.00 |
| ATOM | 140 | N7   | DA | 5 | 4.145  | 0.587  | -5.100 | 1.00 | 0.00 |
| ATOM | 141 | C5   | DA | 5 | 3.943  | -0.740 | -5.100 | 1.00 | 0.00 |
| ATOM | 142 | C6   | DA | 5 | 2.772  | -1.510 | -5.100 | 1.00 | 0.00 |
| ATOM | 143 | N6   | DA | 5 | 1.546  | -0.980 | -5.100 | 1.00 | 0.00 |
| ATOM | 144 | H61  | DA | 5 | 0.735  | -1.582 | -5.100 | 1.00 | 0.00 |
| ATOM | 145 | H62  | DA | 5 | 1.430  | 0.023  | -5.100 | 1.00 | 0.00 |
| ATOM | 146 | N1   | DA | 5 | 2.931  | -2.834 | -5.100 | 1.00 | 0.00 |
| ATOM | 147 | C2   | DA | 5 | 4.139  | -3.395 | -5.100 | 1.00 | 0.00 |
| ATOM | 148 | H2   | DA | 5 | 4.271  | -4.467 | -5.100 | 1.00 | 0.00 |
| ATOM | 149 | N3   | DA | 5 | 5.318  | -2.772 | -5.100 | 1.00 | 0.00 |
| ATOM | 150 | C4   | DA | 5 | 5.134  | -1.434 | -5.100 | 1.00 | 0.00 |
| ATOM | 151 | C3'  | DA | 5 | 8.509  | -1.738 | -3.156 | 1.00 | 0.00 |
| ATOM | 152 | H3'  | DA | 5 | 7.616  | -2.140 | -2.677 | 1.00 | 0.00 |
| ATOM | 153 | C2'  | DA | 5 | 8.182  | -0.410 | -3.798 | 1.00 | 0.00 |
| ATOM | 154 | H2'  | DA | 5 | 8.082  | 0.353  | -3.026 | 1.00 | 0.00 |
| ATOM | 155 | H2'' | DA | 5 | 8.982  | -0.130 | -4.483 | 1.00 | 0.00 |
| ATOM | 156 | O3'  | DA | 5 | 9.547  | -1.550 | -2.172 | 1.00 | 0.00 |
| ATOM | 157 | P    | DA | 6 | 10.698 | -0.416 | -2.239 | 1.00 | 0.00 |
| ATOM | 158 | OP1  | DA | 6 | 11.609 | -0.608 | -1.093 | 1.00 | 0.00 |
| ATOM | 159 | OP2  | DA | 6 | 11.346 | -0.501 | -3.569 | 1.00 | 0.00 |
| ATOM | 160 | O5'  | DA | 6 | 10.011 | 1.054  | -2.092 | 1.00 | 0.00 |
| ATOM | 161 | C5'  | DA | 6 | 9.531  | 1.576  | -0.837 | 1.00 | 0.00 |
| ATOM | 162 | H5'  | DA | 6 | 10.328 | 1.704  | -0.105 | 1.00 | 0.00 |
| ATOM | 163 | H5'' | DA | 6 | 8.854  | 0.856  | -0.379 | 1.00 | 0.00 |
| ATOM | 164 | C4'  | DA | 6 | 8.770  | 2.898  | -0.990 | 1.00 | 0.00 |
| ATOM | 165 | H4'  | DA | 6 | 9.364  | 3.662  | -1.491 | 1.00 | 0.00 |
| ATOM | 166 | O4'  | DA | 6 | 7.684  | 2.629  | -1.902 | 1.00 | 0.00 |
| ATOM | 167 | C1'  | DA | 6 | 6.676  | 3.603  | -1.700 | 1.00 | 0.00 |
| ATOM | 168 | H1'  | DA | 6 | 6.664  | 4.315  | -2.526 | 1.00 | 0.00 |
| ATOM | 169 | N9   | DA | 6 | 5.313  | 3.076  | -1.700 | 1.00 | 0.00 |
| ATOM | 170 | C8   | DA | 6 | 4.101  | 3.708  | -1.700 | 1.00 | 0.00 |
| ATOM | 171 | H8   | DA | 6 | 4.020  | 4.784  | -1.749 | 1.00 | 0.00 |
| ATOM | 172 | N7   | DA | 6 | 3.077  | 2.838  | -1.700 | 1.00 | 0.00 |
| ATOM | 173 | C5   | DA | 6 | 3.665  | 1.631  | -1.700 | 1.00 | 0.00 |
| ATOM | 174 | C6   | DA | 6 | 3.139  | 0.332  | -1.700 | 1.00 | 0.00 |
| ATOM | 175 | N6   | DA | 6 | 1.830  | 0.072  | -1.700 | 1.00 | 0.00 |
| ATOM | 176 | H61  | DA | 6 | 1.505  | -0.884 | -1.700 | 1.00 | 0.00 |
| ATOM | 177 | H62  | DA | 6 | 1.164  | 0.832  | -1.700 | 1.00 | 0.00 |

|      |     |      |    |   |        |        |        |      |      |
|------|-----|------|----|---|--------|--------|--------|------|------|
| ATOM | 178 | N1   | DA | 6 | 4.022  | -0.667 | -1.700 | 1.00 | 0.00 |
| ATOM | 179 | C2   | DA | 6 | 5.335  | -0.442 | -1.700 | 1.00 | 0.00 |
| ATOM | 180 | H2   | DA | 6 | 6.053  | -1.249 | -1.700 | 1.00 | 0.00 |
| ATOM | 181 | N3   | DA | 6 | 5.951  | 0.740  | -1.700 | 1.00 | 0.00 |
| ATOM | 182 | C4   | DA | 6 | 5.040  | 1.737  | -1.700 | 1.00 | 0.00 |
| ATOM | 183 | C3'  | DA | 6 | 7.990  | 3.404  | 0.244  | 1.00 | 0.00 |
| ATOM | 184 | H3'  | DA | 6 | 7.484  | 2.566  | 0.723  | 1.00 | 0.00 |
| ATOM | 185 | C2'  | DA | 6 | 6.966  | 4.311  | -0.398 | 1.00 | 0.00 |
| ATOM | 186 | H2'  | DA | 6 | 6.450  | 4.882  | 0.374  | 1.00 | 0.00 |
| ATOM | 187 | H2'' | DA | 6 | 7.465  | 4.996  | -1.083 | 1.00 | 0.00 |
| ATOM | 188 | O3'  | DA | 6 | 8.737  | 4.148  | 1.228  | 1.00 | 0.00 |
| ATOM | 189 | P    | DT | 7 | 9.040  | 5.735  | 1.161  | 1.00 | 0.00 |
| ATOM | 190 | OP1  | DT | 7 | 9.899  | 6.095  | 2.307  | 1.00 | 0.00 |
| ATOM | 191 | OP2  | DT | 7 | 9.622  | 6.034  | -0.169 | 1.00 | 0.00 |
| ATOM | 192 | O5'  | DT | 7 | 7.640  | 6.555  | 1.308  | 1.00 | 0.00 |
| ATOM | 193 | C5'  | DT | 7 | 6.948  | 6.712  | 2.563  | 1.00 | 0.00 |
| ATOM | 194 | H5'  | DT | 7 | 7.531  | 7.271  | 3.295  | 1.00 | 0.00 |
| ATOM | 195 | H5'' | DT | 7 | 6.800  | 5.734  | 3.022  | 1.00 | 0.00 |
| ATOM | 196 | C4'  | DT | 7 | 5.571  | 7.367  | 2.410  | 1.00 | 0.00 |
| ATOM | 197 | H4'  | DT | 7 | 5.627  | 8.333  | 1.909  | 1.00 | 0.00 |
| ATOM | 198 | O4'  | DT | 7 | 4.830  | 6.529  | 1.498  | 1.00 | 0.00 |
| ATOM | 199 | C1'  | DT | 7 | 3.447  | 6.758  | 1.700  | 1.00 | 0.00 |
| ATOM | 200 | H1'  | DT | 7 | 3.045  | 7.329  | 0.863  | 1.00 | 0.00 |
| ATOM | 201 | N1   | DT | 7 | 2.624  | 5.550  | 1.700  | 1.00 | 0.00 |
| ATOM | 202 | C6   | DT | 7 | 1.306  | 5.840  | 1.700  | 1.00 | 0.00 |
| ATOM | 203 | H6   | DT | 7 | 0.978  | 6.868  | 1.656  | 1.00 | 0.00 |
| ATOM | 204 | C5   | DT | 7 | 0.363  | 4.849  | 1.700  | 1.00 | 0.00 |
| ATOM | 205 | C7   | DT | 7 | -1.082 | 5.286  | 1.700  | 1.00 | 0.00 |
| ATOM | 206 | H71  | DT | 7 | -1.282 | 5.883  | 0.810  | 1.00 | 0.00 |
| ATOM | 207 | H72  | DT | 7 | -1.728 | 4.408  | 1.700  | 1.00 | 0.00 |
| ATOM | 208 | H73  | DT | 7 | -1.282 | 5.883  | 2.590  | 1.00 | 0.00 |
| ATOM | 209 | C4   | DT | 7 | 0.774  | 3.523  | 1.700  | 1.00 | 0.00 |
| ATOM | 210 | O4   | DT | 7 | 0.012  | 2.565  | 1.700  | 1.00 | 0.00 |
| ATOM | 211 | N3   | DT | 7 | 2.104  | 3.313  | 1.700  | 1.00 | 0.00 |
| ATOM | 212 | H3   | DT | 7 | 2.454  | 2.281  | 1.700  | 1.00 | 0.00 |
| ATOM | 213 | C2   | DT | 7 | 3.041  | 4.267  | 1.700  | 1.00 | 0.00 |
| ATOM | 214 | O2   | DT | 7 | 4.234  | 3.983  | 1.700  | 1.00 | 0.00 |
| ATOM | 215 | C3'  | DT | 7 | 4.641  | 7.341  | 3.644  | 1.00 | 0.00 |
| ATOM | 216 | H3'  | DT | 7 | 4.700  | 6.364  | 4.123  | 1.00 | 0.00 |
| ATOM | 217 | C2'  | DT | 7 | 3.284  | 7.505  | 3.002  | 1.00 | 0.00 |
| ATOM | 218 | H2'  | DT | 7 | 2.535  | 7.682  | 3.774  | 1.00 | 0.00 |
| ATOM | 219 | H2'' | DT | 7 | 3.306  | 8.352  | 2.317  | 1.00 | 0.00 |
| ATOM | 220 | O3'  | DT | 7 | 4.833  | 8.378  | 4.628  | 1.00 | 0.00 |
| ATOM | 221 | P    | DT | 8 | 4.181  | 9.856  | 4.561  | 1.00 | 0.00 |
| ATOM | 222 | OP1  | DT | 8 | 4.683  | 10.640 | 5.707  | 1.00 | 0.00 |
| ATOM | 223 | OP2  | DT | 8 | 4.490  | 10.432 | 3.231  | 1.00 | 0.00 |
| ATOM | 224 | O5'  | DT | 8 | 2.563  | 9.734  | 4.708  | 1.00 | 0.00 |
| ATOM | 225 | C5'  | DT | 8 | 1.904  | 9.470  | 5.963  | 1.00 | 0.00 |
| ATOM | 226 | H5'  | DT | 8 | 2.067  | 10.262 | 6.694  | 1.00 | 0.00 |
| ATOM | 227 | H5'' | DT | 8 | 2.337  | 8.581  | 6.422  | 1.00 | 0.00 |
| ATOM | 228 | C4'  | DT | 8 | 0.399  | 9.227  | 5.810  | 1.00 | 0.00 |
| ATOM | 229 | H4'  | DT | 8 | -0.104 | 10.054 | 5.309  | 1.00 | 0.00 |
| ATOM | 230 | O4'  | DT | 8 | 0.265  | 8.117  | 4.898  | 1.00 | 0.00 |
| ATOM | 231 | C1'  | DT | 8 | -1.003 | 7.519  | 5.100  | 1.00 | 0.00 |
| ATOM | 232 | H1'  | DT | 8 | -1.659 | 7.760  | 4.263  | 1.00 | 0.00 |
| ATOM | 233 | N1   | DT | 8 | -0.993 | 6.058  | 5.100  | 1.00 | 0.00 |
| ATOM | 234 | C6   | DT | 8 | -2.243 | 5.548  | 5.100  | 1.00 | 0.00 |
| ATOM | 235 | H6   | DT | 8 | -3.097 | 6.208  | 5.056  | 1.00 | 0.00 |
| ATOM | 236 | C5   | DT | 8 | -2.456 | 4.197  | 5.100  | 1.00 | 0.00 |
| ATOM | 237 | C7   | DT | 8 | -3.894 | 3.736  | 5.100  | 1.00 | 0.00 |

|      |     |      |    |    |        |        |        |      |      |
|------|-----|------|----|----|--------|--------|--------|------|------|
| ATOM | 238 | H71  | DT | 8  | -4.397 | 4.114  | 4.210  | 1.00 | 0.00 |
| ATOM | 239 | H72  | DT | 8  | -3.927 | 2.646  | 5.100  | 1.00 | 0.00 |
| ATOM | 240 | H73  | DT | 8  | -4.397 | 4.114  | 5.990  | 1.00 | 0.00 |
| ATOM | 241 | C4   | DT | 8  | -1.365 | 3.339  | 5.100  | 1.00 | 0.00 |
| ATOM | 242 | O4   | DT | 8  | -1.448 | 2.117  | 5.100  | 1.00 | 0.00 |
| ATOM | 243 | N3   | DT | 8  | -0.151 | 3.922  | 5.100  | 1.00 | 0.00 |
| ATOM | 244 | H3   | DT | 8  | 0.724  | 3.272  | 5.100  | 1.00 | 0.00 |
| ATOM | 245 | C2   | DT | 8  | 0.078  | 5.239  | 5.100  | 1.00 | 0.00 |
| ATOM | 246 | O2   | DT | 8  | 1.222  | 5.683  | 5.100  | 1.00 | 0.00 |
| ATOM | 247 | C3'  | DT | 8  | -0.351 | 8.678  | 7.044  | 1.00 | 0.00 |
| ATOM | 248 | H3'  | DT | 8  | 0.253  | 7.907  | 7.523  | 1.00 | 0.00 |
| ATOM | 249 | C2'  | DT | 8  | -1.562 | 8.042  | 6.402  | 1.00 | 0.00 |
| ATOM | 250 | H2'  | DT | 8  | -2.279 | 7.763  | 7.174  | 1.00 | 0.00 |
| ATOM | 251 | H2'' | DT | 8  | -2.025 | 8.751  | 5.716  | 1.00 | 0.00 |
| ATOM | 252 | O3'  | DT | 8  | -0.782 | 9.640  | 8.028  | 1.00 | 0.00 |
| ATOM | 253 | P    | DC | 9  | -2.159 | 10.486 | 7.961  | 1.00 | 0.00 |
| ATOM | 254 | OP1  | DC | 9  | -2.191 | 11.417 | 9.107  | 1.00 | 0.00 |
| ATOM | 255 | OP2  | DC | 9  | -2.231 | 11.136 | 6.631  | 1.00 | 0.00 |
| ATOM | 256 | O5'  | DC | 9  | -3.421 | 9.467  | 8.108  | 1.00 | 0.00 |
| ATOM | 257 | C5'  | DC | 9  | -3.813 | 8.875  | 9.363  | 1.00 | 0.00 |
| ATOM | 258 | H5'  | DC | 9  | -4.128 | 9.618  | 10.095 | 1.00 | 0.00 |
| ATOM | 259 | H5'' | DC | 9  | -2.951 | 8.389  | 9.821  | 1.00 | 0.00 |
| ATOM | 260 | C4'  | DC | 9  | -4.914 | 7.820  | 9.210  | 1.00 | 0.00 |
| ATOM | 261 | H4'  | DC | 9  | -5.798 | 8.214  | 8.709  | 1.00 | 0.00 |
| ATOM | 262 | O4'  | DC | 9  | -4.393 | 6.830  | 8.298  | 1.00 | 0.00 |
| ATOM | 263 | C1'  | DC | 9  | -5.097 | 5.618  | 8.500  | 1.00 | 0.00 |
| ATOM | 264 | H1'  | DC | 9  | -5.745 | 5.479  | 7.634  | 1.00 | 0.00 |
| ATOM | 265 | N1   | DC | 9  | -4.259 | 4.421  | 8.500  | 1.00 | 0.00 |
| ATOM | 266 | C6   | DC | 9  | -4.895 | 3.210  | 8.500  | 1.00 | 0.00 |
| ATOM | 267 | H6   | DC | 9  | -5.974 | 3.158  | 8.500  | 1.00 | 0.00 |
| ATOM | 268 | C5   | DC | 9  | -4.171 | 2.040  | 8.500  | 1.00 | 0.00 |
| ATOM | 269 | H5   | DC | 9  | -4.675 | 1.073  | 8.500  | 1.00 | 0.00 |
| ATOM | 270 | C4   | DC | 9  | -2.800 | 2.174  | 8.500  | 1.00 | 0.00 |
| ATOM | 271 | N4   | DC | 9  | -2.016 | 1.105  | 8.500  | 1.00 | 0.00 |
| ATOM | 272 | H41  | DC | 9  | -1.017 | 1.255  | 8.500  | 1.00 | 0.00 |
| ATOM | 273 | H42  | DC | 9  | -2.418 | 0.179  | 8.500  | 1.00 | 0.00 |
| ATOM | 274 | N3   | DC | 9  | -2.192 | 3.390  | 8.500  | 1.00 | 0.00 |
| ATOM | 275 | C2   | DC | 9  | -2.919 | 4.536  | 8.500  | 1.00 | 0.00 |
| ATOM | 276 | O2   | DC | 9  | -2.381 | 5.637  | 8.500  | 1.00 | 0.00 |
| ATOM | 277 | C3'  | DC | 9  | -5.219 | 6.942  | 10.444 | 1.00 | 0.00 |
| ATOM | 278 | H3'  | DC | 9  | -4.284 | 6.651  | 10.923 | 1.00 | 0.00 |
| ATOM | 279 | C2'  | DC | 9  | -5.854 | 5.731  | 9.802  | 1.00 | 0.00 |
| ATOM | 280 | H2'  | DC | 9  | -6.285 | 5.094  | 10.574 | 1.00 | 0.00 |
| ATOM | 281 | H2'' | DC | 9  | -6.638 | 6.052  | 9.117  | 1.00 | 0.00 |
| ATOM | 282 | O3'  | DC | 9  | -6.121 | 7.489  | 11.428 | 1.00 | 0.00 |
| ATOM | 283 | P    | DG | 10 | -7.734 | 7.403  | 11.361 | 1.00 | 0.00 |
| ATOM | 284 | OP1  | DG | 10 | -8.289 | 8.151  | 12.507 | 1.00 | 0.00 |
| ATOM | 285 | OP2  | DG | 10 | -8.163 | 7.896  | 10.031 | 1.00 | 0.00 |
| ATOM | 286 | O5'  | DG | 10 | -8.194 | 5.847  | 11.508 | 1.00 | 0.00 |
| ATOM | 287 | C5'  | DG | 10 | -8.181 | 5.137  | 12.763 | 1.00 | 0.00 |
| ATOM | 288 | H5'  | DG | 10 | -8.863 | 5.569  | 13.495 | 1.00 | 0.00 |
| ATOM | 289 | H5'' | DG | 10 | -7.196 | 5.227  | 13.222 | 1.00 | 0.00 |
| ATOM | 290 | C4'  | DG | 10 | -8.487 | 3.644  | 12.610 | 1.00 | 0.00 |
| ATOM | 291 | H4'  | DG | 10 | -9.439 | 3.466  | 12.109 | 1.00 | 0.00 |
| ATOM | 292 | O4'  | DG | 10 | -7.496 | 3.125  | 11.698 | 1.00 | 0.00 |
| ATOM | 293 | C1'  | DG | 10 | -7.387 | 1.727  | 11.900 | 1.00 | 0.00 |
| ATOM | 294 | H1'  | DG | 10 | -7.842 | 1.244  | 11.035 | 1.00 | 0.00 |
| ATOM | 295 | N9   | DG | 10 | -6.017 | 1.218  | 11.900 | 1.00 | 0.00 |
| ATOM | 296 | C8   | DG | 10 | -5.634 | -0.103 | 11.900 | 1.00 | 0.00 |
| ATOM | 297 | H8   | DG | 10 | -6.351 | -0.911 | 11.902 | 1.00 | 0.00 |

|      |     |      |     |    |         |        |        |      |      |
|------|-----|------|-----|----|---------|--------|--------|------|------|
| ATOM | 298 | N7   | DG  | 10 | -4.300  | -0.233 | 11.900 | 1.00 | 0.00 |
| ATOM | 299 | C5   | DG  | 10 | -3.864  | 1.042  | 11.900 | 1.00 | 0.00 |
| ATOM | 300 | C6   | DG  | 10 | -2.555  | 1.550  | 11.900 | 1.00 | 0.00 |
| ATOM | 301 | O6   | DG  | 10 | -1.493  | 0.925  | 11.900 | 1.00 | 0.00 |
| ATOM | 302 | N1   | DG  | 10 | -2.542  | 2.924  | 11.900 | 1.00 | 0.00 |
| ATOM | 303 | H1   | DG  | 10 | -1.634  | 3.343  | 11.900 | 1.00 | 0.00 |
| ATOM | 304 | C2   | DG  | 10 | -3.617  | 3.758  | 11.900 | 1.00 | 0.00 |
| ATOM | 305 | N2   | DG  | 10 | -3.391  | 5.075  | 11.900 | 1.00 | 0.00 |
| ATOM | 306 | H21  | DG  | 10 | -2.493  | 5.538  | 11.912 | 1.00 | 0.00 |
| ATOM | 307 | H22  | DG  | 10 | -4.205  | 5.672  | 11.909 | 1.00 | 0.00 |
| ATOM | 308 | N3   | DG  | 10 | -4.861  | 3.286  | 11.900 | 1.00 | 0.00 |
| ATOM | 309 | C4   | DG  | 10 | -4.899  | 1.948  | 11.900 | 1.00 | 0.00 |
| ATOM | 310 | C3'  | DG  | 10 | -8.239  | 2.748  | 13.844 | 1.00 | 0.00 |
| ATOM | 311 | H3'  | DG  | 10 | -7.305  | 3.040  | 14.323 | 1.00 | 0.00 |
| ATOM | 312 | C2'  | DG  | 10 | -8.073  | 1.390  | 13.202 | 1.00 | 0.00 |
| ATOM | 313 | H2'  | DG  | 10 | -8.065  | 0.621  | 13.974 | 1.00 | 0.00 |
| ATOM | 314 | H2'' | DG  | 10 | -8.901  | 1.208  | 12.517 | 1.00 | 0.00 |
| ATOM | 315 | O3'  | DG  | 10 | -9.292  | 2.686  | 14.828 | 1.00 | 0.00 |
| ATOM | 316 | P    | DC  | 11 | -10.570 | 1.698  | 14.761 | 1.00 | 0.00 |
| ATOM | 317 | OP1  | DC  | 11 | -11.452 | 1.998  | 15.907 | 1.00 | 0.00 |
| ATOM | 318 | OP2  | DC  | 11 | -11.204 | 1.861  | 13.431 | 1.00 | 0.00 |
| ATOM | 319 | O5'  | DC  | 11 | -10.065 | 0.157  | 14.908 | 1.00 | 0.00 |
| ATOM | 320 | C5'  | DC  | 11 | -9.651  | -0.420 | 16.163 | 1.00 | 0.00 |
| ATOM | 321 | H5'  | DC  | 11 | -10.459 | -0.452 | 16.894 | 1.00 | 0.00 |
| ATOM | 322 | H5'' | DC  | 11 | -8.892  | 0.214  | 16.622 | 1.00 | 0.00 |
| ATOM | 323 | C4'  | DC  | 11 | -9.054  | -1.823 | 16.010 | 1.00 | 0.00 |
| ATOM | 324 | H4'  | DC  | 11 | -9.736  | -2.510 | 15.509 | 1.00 | 0.00 |
| ATOM | 325 | O4'  | DC  | 11 | -7.944  | -1.687 | 15.098 | 1.00 | 0.00 |
| ATOM | 326 | C1'  | DC  | 11 | -7.060  | -2.775 | 15.300 | 1.00 | 0.00 |
| ATOM | 327 | H1'  | DC  | 11 | -7.160  | -3.430 | 14.434 | 1.00 | 0.00 |
| ATOM | 328 | N1   | DC  | 11 | -5.644  | -2.416 | 15.300 | 1.00 | 0.00 |
| ATOM | 329 | C6   | DC  | 11 | -4.737  | -3.439 | 15.300 | 1.00 | 0.00 |
| ATOM | 330 | H6   | DC  | 11 | -5.071  | -4.466 | 15.300 | 1.00 | 0.00 |
| ATOM | 331 | C5   | DC  | 11 | -3.386  | -3.177 | 15.300 | 1.00 | 0.00 |
| ATOM | 332 | H5   | DC  | 11 | -2.661  | -3.991 | 15.300 | 1.00 | 0.00 |
| ATOM | 333 | C4   | DC  | 11 | -3.025  | -1.848 | 15.300 | 1.00 | 0.00 |
| ATOM | 334 | N4   | DC  | 11 | -1.748  | -1.494 | 15.300 | 1.00 | 0.00 |
| ATOM | 335 | H41  | DC  | 11 | -1.534  | -0.507 | 15.300 | 1.00 | 0.00 |
| ATOM | 336 | H42  | DC  | 11 | -1.024  | -2.199 | 15.300 | 1.00 | 0.00 |
| ATOM | 337 | N3   | DC  | 11 | -3.947  | -0.849 | 15.300 | 1.00 | 0.00 |
| ATOM | 338 | C2   | DC  | 11 | -5.276  | -1.122 | 15.300 | 1.00 | 0.00 |
| ATOM | 339 | O2   | DC  | 11 | -6.115  | -0.228 | 15.300 | 1.00 | 0.00 |
| ATOM | 340 | C3'  | DC  | 11 | -8.341  | -2.420 | 17.244 | 1.00 | 0.00 |
| ATOM | 341 | H3'  | DC  | 11 | -7.737  | -1.649 | 17.723 | 1.00 | 0.00 |
| ATOM | 342 | C2'  | DC  | 11 | -7.434  | -3.443 | 16.602 | 1.00 | 0.00 |
| ATOM | 343 | H2'  | DC  | 11 | -6.991  | -4.072 | 17.374 | 1.00 | 0.00 |
| ATOM | 344 | H2'' | DC  | 11 | -8.012  | -4.062 | 15.916 | 1.00 | 0.00 |
| ATOM | 345 | O3'  | DC  | 11 | -9.172  | -3.069 | 18.228 | 1.00 | 0.00 |
| ATOM | 346 | P    | DG3 | 12 | -9.664  | -4.608 | 18.161 | 1.00 | 0.00 |
| ATOM | 347 | OP1  | DG3 | 12 | -10.559 | -4.862 | 19.307 | 1.00 | 0.00 |
| ATOM | 348 | OP2  | DG3 | 12 | -10.277 | -4.834 | 16.831 | 1.00 | 0.00 |
| ATOM | 349 | O5'  | DG3 | 12 | -8.372  | -5.589 | 18.308 | 1.00 | 0.00 |
| ATOM | 350 | C5'  | DG3 | 12 | -7.704  | -5.828 | 19.563 | 1.00 | 0.00 |
| ATOM | 351 | H5'  | DG3 | 12 | -8.351  | -6.313 | 20.294 | 1.00 | 0.00 |
| ATOM | 352 | H5'' | DG3 | 12 | -7.440  | -4.875 | 20.022 | 1.00 | 0.00 |
| ATOM | 353 | C4'  | DG3 | 12 | -6.415  | -6.644 | 19.410 | 1.00 | 0.00 |
| ATOM | 354 | H4'  | DG3 | 12 | -6.586  | -7.597 | 18.909 | 1.00 | 0.00 |
| ATOM | 355 | O4'  | DG3 | 12 | -5.579  | -5.901 | 18.498 | 1.00 | 0.00 |
| ATOM | 356 | C1'  | DG3 | 12 | -4.233  | -6.295 | 18.700 | 1.00 | 0.00 |
| ATOM | 357 | H1'  | DG3 | 12 | -3.942  | -6.891 | 17.835 | 1.00 | 0.00 |



|      |     |      |     |    |         |        |        |      |      |
|------|-----|------|-----|----|---------|--------|--------|------|------|
| ATOM | 358 | N9   | DG3 | 12 | -3.272  | -5.194 | 18.700 | 1.00 | 0.00 |
| ATOM | 359 | C8   | DG3 | 12 | -1.901  | -5.305 | 18.700 | 1.00 | 0.00 |
| ATOM | 360 | H8   | DG3 | 12 | -1.400  | -6.262 | 18.702 | 1.00 | 0.00 |
| ATOM | 361 | N7   | DG3 | 12 | -1.306  | -4.103 | 18.700 | 1.00 | 0.00 |
| ATOM | 362 | C5   | DG3 | 12 | -2.344  | -3.243 | 18.700 | 1.00 | 0.00 |
| ATOM | 363 | C6   | DG3 | 12 | -2.356  | -1.840 | 18.700 | 1.00 | 0.00 |
| ATOM | 364 | O6   | DG3 | 12 | -1.394  | -1.068 | 18.700 | 1.00 | 0.00 |
| ATOM | 365 | N1   | DG3 | 12 | -3.635  | -1.340 | 18.700 | 1.00 | 0.00 |
| ATOM | 366 | H1   | DG3 | 12 | -3.706  | -0.342 | 18.700 | 1.00 | 0.00 |
| ATOM | 367 | C2   | DG3 | 12 | -4.796  | -2.050 | 18.700 | 1.00 | 0.00 |
| ATOM | 368 | N2   | DG3 | 12 | -5.948  | -1.372 | 18.700 | 1.00 | 0.00 |
| ATOM | 369 | H21  | DG3 | 12 | -6.063  | -0.369 | 18.712 | 1.00 | 0.00 |
| ATOM | 370 | H22  | DG3 | 12 | -6.795  | -1.922 | 18.709 | 1.00 | 0.00 |
| ATOM | 371 | N3   | DG3 | 12 | -4.795  | -3.380 | 18.700 | 1.00 | 0.00 |
| ATOM | 372 | C4   | DG3 | 12 | -3.558  | -3.891 | 18.700 | 1.00 | 0.00 |
| ATOM | 373 | C3'  | DG3 | 12 | -5.490  | -6.730 | 20.644 | 1.00 | 0.00 |
| ATOM | 374 | H3'  | DG3 | 12 | -5.432  | -5.753 | 21.123 | 1.00 | 0.00 |
| ATOM | 375 | C2'  | DG3 | 12 | -4.162  | -7.056 | 20.002 | 1.00 | 0.00 |
| ATOM | 376 | H2'  | DG3 | 12 | -3.440  | -7.322 | 20.774 | 1.00 | 0.00 |
| ATOM | 377 | H2'' | DG3 | 12 | -4.285  | -7.894 | 19.316 | 1.00 | 0.00 |
| ATOM | 378 | O3'  | DG3 | 12 | -5.805  | -7.736 | 21.628 | 1.00 | 0.00 |
| ATOM | 379 | HO3' | DG3 | 12 | -5.212  | -7.764 | 22.383 | 1.00 | 0.00 |
| TER  |     |      |     |    |         |        |        |      |      |
| ATOM | 380 | HO5' | DC5 | 13 | -10.397 | 1.488  | 19.095 | 1.00 | 0.00 |
| ATOM | 381 | O5'  | DC5 | 13 | -9.812  | 2.249  | 19.092 | 1.00 | 0.00 |
| ATOM | 382 | C5'  | DC5 | 13 | -9.272  | 2.710  | 17.837 | 1.00 | 0.00 |
| ATOM | 383 | H5'  | DC5 | 13 | -10.048 | 2.933  | 17.105 | 1.00 | 0.00 |
| ATOM | 384 | H5'' | DC5 | 13 | -8.682  | 1.861  | 17.492 | 1.00 | 0.00 |
| ATOM | 385 | C4'  | DC5 | 13 | -8.358  | 3.930  | 17.990 | 1.00 | 0.00 |
| ATOM | 386 | H4'  | DC5 | 13 | -8.857  | 4.760  | 18.491 | 1.00 | 0.00 |
| ATOM | 387 | O4'  | DC5 | 13 | -7.312  | 3.533  | 18.902 | 1.00 | 0.00 |
| ATOM | 388 | C1'  | DC5 | 13 | -6.194  | 4.379  | 18.700 | 1.00 | 0.00 |
| ATOM | 389 | H1'  | DC5 | 13 | -6.134  | 5.039  | 19.566 | 1.00 | 0.00 |
| ATOM | 390 | N1   | DC5 | 13 | -4.905  | 3.692  | 18.700 | 1.00 | 0.00 |
| ATOM | 391 | C6   | DC5 | 13 | -3.780  | 4.470  | 18.700 | 1.00 | 0.00 |
| ATOM | 392 | H6   | DC5 | 13 | -3.860  | 5.547  | 18.700 | 1.00 | 0.00 |
| ATOM | 393 | C5   | DC5 | 13 | -2.530  | 3.893  | 18.700 | 1.00 | 0.00 |
| ATOM | 394 | H5   | DC5 | 13 | -1.631  | 4.510  | 18.700 | 1.00 | 0.00 |
| ATOM | 395 | C4   | DC5 | 13 | -2.497  | 2.516  | 18.700 | 1.00 | 0.00 |
| ATOM | 396 | N4   | DC5 | 13 | -1.341  | 1.867  | 18.700 | 1.00 | 0.00 |
| ATOM | 397 | H41  | DC5 | 13 | -1.369  | 0.857  | 18.700 | 1.00 | 0.00 |
| ATOM | 398 | H42  | DC5 | 13 | -0.470  | 2.378  | 18.700 | 1.00 | 0.00 |
| ATOM | 399 | N3   | DC5 | 13 | -3.630  | 1.765  | 18.700 | 1.00 | 0.00 |
| ATOM | 400 | C2   | DC5 | 13 | -4.856  | 2.348  | 18.700 | 1.00 | 0.00 |
| ATOM | 401 | O2   | DC5 | 13 | -5.884  | 1.680  | 18.700 | 1.00 | 0.00 |
| ATOM | 402 | C3'  | DC5 | 13 | -7.523  | 4.339  | 16.756 | 1.00 | 0.00 |
| ATOM | 403 | H3'  | DC5 | 13 | -7.121  | 3.447  | 16.276 | 1.00 | 0.00 |
| ATOM | 404 | C2'  | DC5 | 13 | -6.398  | 5.116  | 17.398 | 1.00 | 0.00 |
| ATOM | 405 | H2'  | DC5 | 13 | -5.817  | 5.621  | 16.626 | 1.00 | 0.00 |
| ATOM | 406 | H2'' | DC5 | 13 | -6.812  | 5.856  | 18.083 | 1.00 | 0.00 |
| ATOM | 407 | O3'  | DC5 | 13 | -8.176  | 5.168  | 15.772 | 1.00 | 0.00 |
| ATOM | 408 | P    | DG  | 14 | -8.286  | 6.780  | 15.839 | 1.00 | 0.00 |
| ATOM | 409 | OP1  | DG  | 14 | -9.095  | 7.240  | 14.693 | 1.00 | 0.00 |
| ATOM | 410 | OP2  | DG  | 14 | -8.827  | 7.146  | 17.169 | 1.00 | 0.00 |
| ATOM | 411 | O5'  | DG  | 14 | -6.797  | 7.425  | 15.692 | 1.00 | 0.00 |
| ATOM | 412 | C5'  | DG  | 14 | -6.091  | 7.498  | 14.437 | 1.00 | 0.00 |
| ATOM | 413 | H5'  | DG  | 14 | -6.603  | 8.123  | 13.705 | 1.00 | 0.00 |
| ATOM | 414 | H5'' | DG  | 14 | -6.061  | 6.510  | 13.978 | 1.00 | 0.00 |
| ATOM | 415 | C4'  | DG  | 14 | -4.645  | 7.983  | 14.590 | 1.00 | 0.00 |
| ATOM | 416 | H4'  | DG  | 14 | -4.583  | 8.949  | 15.091 | 1.00 | 0.00 |

|      |     |      |    |    |        |        |        |      |      |
|------|-----|------|----|----|--------|--------|--------|------|------|
| ATOM | 417 | O4'  | DG | 14 | -4.010 | 7.062  | 15.502 | 1.00 | 0.00 |
| ATOM | 418 | C1'  | DG | 14 | -2.610 | 7.123  | 15.300 | 1.00 | 0.00 |
| ATOM | 419 | H1'  | DG | 14 | -2.185 | 7.633  | 16.165 | 1.00 | 0.00 |
| ATOM | 420 | N9   | DG | 14 | -1.938 | 5.825  | 15.300 | 1.00 | 0.00 |
| ATOM | 421 | C8   | DG | 14 | -0.580 | 5.605  | 15.300 | 1.00 | 0.00 |
| ATOM | 422 | H8   | DG | 14 | 0.136  | 6.414  | 15.298 | 1.00 | 0.00 |
| ATOM | 423 | N7   | DG | 14 | -0.290 | 4.296  | 15.300 | 1.00 | 0.00 |
| ATOM | 424 | C5   | DG | 14 | -1.503 | 3.709  | 15.300 | 1.00 | 0.00 |
| ATOM | 425 | C6   | DG | 14 | -1.849 | 2.349  | 15.300 | 1.00 | 0.00 |
| ATOM | 426 | O6   | DG | 14 | -1.099 | 1.370  | 15.300 | 1.00 | 0.00 |
| ATOM | 427 | N1   | DG | 14 | -3.210 | 2.169  | 15.300 | 1.00 | 0.00 |
| ATOM | 428 | H1   | DG | 14 | -3.516 | 1.217  | 15.300 | 1.00 | 0.00 |
| ATOM | 429 | C2   | DG | 14 | -4.169 | 3.135  | 15.300 | 1.00 | 0.00 |
| ATOM | 430 | N2   | DG | 14 | -5.449 | 2.751  | 15.300 | 1.00 | 0.00 |
| ATOM | 431 | H21  | DG | 14 | -5.799 | 1.804  | 15.288 | 1.00 | 0.00 |
| ATOM | 432 | H22  | DG | 14 | -6.141 | 3.487  | 15.291 | 1.00 | 0.00 |
| ATOM | 433 | N3   | DG | 14 | -3.850 | 4.427  | 15.300 | 1.00 | 0.00 |
| ATOM | 434 | C4   | DG | 14 | -2.527 | 4.627  | 15.300 | 1.00 | 0.00 |
| ATOM | 435 | C3'  | DG | 14 | -3.726 | 7.845  | 13.356 | 1.00 | 0.00 |
| ATOM | 436 | H3'  | DG | 14 | -3.902 | 6.882  | 12.877 | 1.00 | 0.00 |
| ATOM | 437 | C2'  | DG | 14 | -2.358 | 7.845  | 13.998 | 1.00 | 0.00 |
| ATOM | 438 | H2'  | DG | 14 | -1.594 | 7.930  | 13.226 | 1.00 | 0.00 |
| ATOM | 439 | H2'' | DG | 14 | -2.277 | 8.689  | 14.683 | 1.00 | 0.00 |
| ATOM | 440 | O3'  | DG | 14 | -3.792 | 8.898  | 12.372 | 1.00 | 0.00 |
| ATOM | 441 | P    | DC | 15 | -2.967 | 10.287 | 12.439 | 1.00 | 0.00 |
| ATOM | 442 | OP1  | DC | 15 | -3.371 | 11.125 | 11.293 | 1.00 | 0.00 |
| ATOM | 443 | OP2  | DC | 15 | -3.204 | 10.896 | 13.769 | 1.00 | 0.00 |
| ATOM | 444 | O5'  | DC | 15 | -1.375 | 9.972  | 12.292 | 1.00 | 0.00 |
| ATOM | 445 | C5'  | DC | 15 | -0.753 | 9.631  | 11.037 | 1.00 | 0.00 |
| ATOM | 446 | H5'  | DC | 15 | -0.819 | 10.437 | 10.306 | 1.00 | 0.00 |
| ATOM | 447 | H5'' | DC | 15 | -1.291 | 8.801  | 10.578 | 1.00 | 0.00 |
| ATOM | 448 | C4'  | DC | 15 | 0.712  | 9.208  | 11.190 | 1.00 | 0.00 |
| ATOM | 449 | H4'  | DC | 15 | 1.311  | 9.969  | 11.691 | 1.00 | 0.00 |
| ATOM | 450 | O4'  | DC | 15 | 0.712  | 8.090  | 12.102 | 1.00 | 0.00 |
| ATOM | 451 | C1'  | DC | 15 | 1.899  | 7.344  | 11.900 | 1.00 | 0.00 |
| ATOM | 452 | H1'  | DC | 15 | 2.537  | 7.522  | 12.766 | 1.00 | 0.00 |
| ATOM | 453 | N1   | DC | 15 | 1.714  | 5.895  | 11.900 | 1.00 | 0.00 |
| ATOM | 454 | C6   | DC | 15 | 2.840  | 5.119  | 11.900 | 1.00 | 0.00 |
| ATOM | 455 | H6   | DC | 15 | 3.819  | 5.575  | 11.900 | 1.00 | 0.00 |
| ATOM | 456 | C5   | DC | 15 | 2.743  | 3.746  | 11.900 | 1.00 | 0.00 |
| ATOM | 457 | H5   | DC | 15 | 3.638  | 3.124  | 11.900 | 1.00 | 0.00 |
| ATOM | 458 | C4   | DC | 15 | 1.467  | 3.227  | 11.900 | 1.00 | 0.00 |
| ATOM | 459 | N4   | DC | 15 | 1.271  | 1.916  | 11.900 | 1.00 | 0.00 |
| ATOM | 460 | H41  | DC | 15 | 0.317  | 1.584  | 11.900 | 1.00 | 0.00 |
| ATOM | 461 | H42  | DC | 15 | 2.058  | 1.284  | 11.900 | 1.00 | 0.00 |
| ATOM | 462 | N3   | DC | 15 | 0.364  | 4.021  | 11.900 | 1.00 | 0.00 |
| ATOM | 463 | C2   | DC | 15 | 0.475  | 5.373  | 11.900 | 1.00 | 0.00 |
| ATOM | 464 | O2   | DC | 15 | -0.514 | 6.097  | 11.900 | 1.00 | 0.00 |
| ATOM | 465 | C3'  | DC | 15 | 1.391  | 8.573  | 9.956  | 1.00 | 0.00 |
| ATOM | 466 | H3'  | DC | 15 | 0.699  | 7.881  | 9.477  | 1.00 | 0.00 |
| ATOM | 467 | C2'  | DC | 15 | 2.516  | 7.796  | 10.598 | 1.00 | 0.00 |
| ATOM | 468 | H2'  | DC | 15 | 3.194  | 7.433  | 9.826  | 1.00 | 0.00 |
| ATOM | 469 | H2'' | DC | 15 | 3.061  | 8.445  | 11.284 | 1.00 | 0.00 |
| ATOM | 470 | O3'  | DC | 15 | 1.935  | 9.477  | 8.972  | 1.00 | 0.00 |
| ATOM | 471 | P    | DG | 16 | 3.403  | 10.151 | 9.039  | 1.00 | 0.00 |
| ATOM | 472 | OP1  | DG | 16 | 3.547  | 11.071 | 7.893  | 1.00 | 0.00 |
| ATOM | 473 | OP2  | DG | 16 | 3.553  | 10.787 | 10.369 | 1.00 | 0.00 |
| ATOM | 474 | O5'  | DG | 16 | 4.534  | 8.987  | 8.892  | 1.00 | 0.00 |
| ATOM | 475 | C5'  | DG | 16 | 4.852  | 8.353  | 7.637  | 1.00 | 0.00 |
| ATOM | 476 | H5'  | DG | 16 | 5.255  | 9.053  | 6.905  | 1.00 | 0.00 |

|      |     |        |    |    |        |        |       |      |      |
|------|-----|--------|----|----|--------|--------|-------|------|------|
| ATOM | 477 | H5 ' ' | DG | 16 | 3.938  | 7.975  | 7.178 | 1.00 | 0.00 |
| ATOM | 478 | C4'    | DG | 16 | 5.818  | 7.173  | 7.790 | 1.00 | 0.00 |
| ATOM | 479 | H4'    | DG | 16 | 6.743  | 7.458  | 8.291 | 1.00 | 0.00 |
| ATOM | 480 | O4'    | DG | 16 | 5.182  | 6.253  | 8.702 | 1.00 | 0.00 |
| ATOM | 481 | C1'    | DG | 16 | 5.735  | 4.965  | 8.500 | 1.00 | 0.00 |
| ATOM | 482 | H1'    | DG | 16 | 6.363  | 4.749  | 9.365 | 1.00 | 0.00 |
| ATOM | 483 | N9     | DG | 16 | 4.760  | 3.877  | 8.500 | 1.00 | 0.00 |
| ATOM | 484 | C8     | DG | 16 | 5.035  | 2.529  | 8.500 | 1.00 | 0.00 |
| ATOM | 485 | H8     | DG | 16 | 6.045  | 2.147  | 8.498 | 1.00 | 0.00 |
| ATOM | 486 | N7     | DG | 16 | 3.915  | 1.794  | 8.500 | 1.00 | 0.00 |
| ATOM | 487 | C5     | DG | 16 | 2.935  | 2.720  | 8.500 | 1.00 | 0.00 |
| ATOM | 488 | C6     | DG | 16 | 1.541  | 2.561  | 8.500 | 1.00 | 0.00 |
| ATOM | 489 | O6     | DG | 16 | 0.891  | 1.513  | 8.500 | 1.00 | 0.00 |
| ATOM | 490 | N1     | DG | 16 | 0.890  | 3.770  | 8.500 | 1.00 | 0.00 |
| ATOM | 491 | H1     | DG | 16 | -0.109 | 3.718  | 8.500 | 1.00 | 0.00 |
| ATOM | 492 | C2     | DG | 16 | 1.453  | 5.009  | 8.500 | 1.00 | 0.00 |
| ATOM | 493 | N2     | DG | 16 | 0.641  | 6.070  | 8.500 | 1.00 | 0.00 |
| ATOM | 494 | H21    | DG | 16 | -0.369 | 6.063  | 8.488 | 1.00 | 0.00 |
| ATOM | 495 | H22    | DG | 16 | 1.084  | 6.977  | 8.491 | 1.00 | 0.00 |
| ATOM | 496 | N3     | DG | 16 | 2.774  | 5.170  | 8.500 | 1.00 | 0.00 |
| ATOM | 497 | C4     | DG | 16 | 3.431  | 4.003  | 8.500 | 1.00 | 0.00 |
| ATOM | 498 | C3'    | DG | 16 | 6.015  | 6.265  | 6.556 | 1.00 | 0.00 |
| ATOM | 499 | H3'    | DG | 16 | 5.052  | 6.089  | 6.077 | 1.00 | 0.00 |
| ATOM | 500 | C2'    | DG | 16 | 6.500  | 4.986  | 7.198 | 1.00 | 0.00 |
| ATOM | 501 | H2'    | DG | 16 | 6.851  | 4.302  | 6.426 | 1.00 | 0.00 |
| ATOM | 502 | H2 ' ' | DG | 16 | 7.317  | 5.210  | 7.883 | 1.00 | 0.00 |
| ATOM | 503 | O3'    | DG | 16 | 6.976  | 6.700  | 5.572 | 1.00 | 0.00 |
| ATOM | 504 | P      | DA | 17 | 8.567  | 6.420  | 5.639 | 1.00 | 0.00 |
| ATOM | 505 | OP1    | DA | 17 | 9.208  | 7.096  | 4.493 | 1.00 | 0.00 |
| ATOM | 506 | OP2    | DA | 17 | 9.052  | 6.858  | 6.969 | 1.00 | 0.00 |
| ATOM | 507 | O5'    | DA | 17 | 8.837  | 4.820  | 5.492 | 1.00 | 0.00 |
| ATOM | 508 | C5'    | DA | 17 | 8.739  | 4.117  | 4.237 | 1.00 | 0.00 |
| ATOM | 509 | H5'    | DA | 17 | 9.469  | 4.464  | 3.506 | 1.00 | 0.00 |
| ATOM | 510 | H5 ' ' | DA | 17 | 7.773  | 4.325  | 3.778 | 1.00 | 0.00 |
| ATOM | 511 | C4'    | DA | 17 | 8.863  | 2.598  | 4.390 | 1.00 | 0.00 |
| ATOM | 512 | H4'    | DA | 17 | 9.786  | 2.307  | 4.891 | 1.00 | 0.00 |
| ATOM | 513 | O4'    | DA | 17 | 7.817  | 2.202  | 5.302 | 1.00 | 0.00 |
| ATOM | 514 | C1'    | DA | 17 | 7.541  | 0.827  | 5.100 | 1.00 | 0.00 |
| ATOM | 515 | H1'    | DA | 17 | 7.935  | 0.234  | 5.926 | 1.00 | 0.00 |
| ATOM | 516 | N9     | DA | 17 | 6.120  | 0.487  | 5.100 | 1.00 | 0.00 |
| ATOM | 517 | C8     | DA | 17 | 5.482  | -0.722 | 5.100 | 1.00 | 0.00 |
| ATOM | 518 | H8     | DA | 17 | 6.026  | -1.654 | 5.149 | 1.00 | 0.00 |
| ATOM | 519 | N7     | DA | 17 | 4.145  | -0.587 | 5.100 | 1.00 | 0.00 |
| ATOM | 520 | C5     | DA | 17 | 3.943  | 0.740  | 5.100 | 1.00 | 0.00 |
| ATOM | 521 | C6     | DA | 17 | 2.772  | 1.510  | 5.100 | 1.00 | 0.00 |
| ATOM | 522 | N6     | DA | 17 | 1.546  | 0.980  | 5.100 | 1.00 | 0.00 |
| ATOM | 523 | H61    | DA | 17 | 0.735  | 1.582  | 5.100 | 1.00 | 0.00 |
| ATOM | 524 | H62    | DA | 17 | 1.430  | -0.023 | 5.100 | 1.00 | 0.00 |
| ATOM | 525 | N1     | DA | 17 | 2.931  | 2.834  | 5.100 | 1.00 | 0.00 |
| ATOM | 526 | C2     | DA | 17 | 4.139  | 3.395  | 5.100 | 1.00 | 0.00 |
| ATOM | 527 | H2     | DA | 17 | 4.271  | 4.467  | 5.100 | 1.00 | 0.00 |
| ATOM | 528 | N3     | DA | 17 | 5.318  | 2.772  | 5.100 | 1.00 | 0.00 |
| ATOM | 529 | C4     | DA | 17 | 5.134  | 1.434  | 5.100 | 1.00 | 0.00 |
| ATOM | 530 | C3'    | DA | 17 | 8.509  | 1.738  | 3.156 | 1.00 | 0.00 |
| ATOM | 531 | H3'    | DA | 17 | 7.616  | 2.140  | 2.677 | 1.00 | 0.00 |
| ATOM | 532 | C2'    | DA | 17 | 8.182  | 0.410  | 3.798 | 1.00 | 0.00 |
| ATOM | 533 | H2'    | DA | 17 | 8.082  | -0.353 | 3.026 | 1.00 | 0.00 |
| ATOM | 534 | H2 ' ' | DA | 17 | 8.982  | 0.130  | 4.483 | 1.00 | 0.00 |
| ATOM | 535 | O3'    | DA | 17 | 9.547  | 1.550  | 2.172 | 1.00 | 0.00 |
| ATOM | 536 | P      | DA | 18 | 10.698 | 0.416  | 2.239 | 1.00 | 0.00 |

|      |     |      |    |    |        |        |        |      |      |
|------|-----|------|----|----|--------|--------|--------|------|------|
| ATOM | 537 | OP1  | DA | 18 | 11.609 | 0.608  | 1.093  | 1.00 | 0.00 |
| ATOM | 538 | OP2  | DA | 18 | 11.346 | 0.501  | 3.569  | 1.00 | 0.00 |
| ATOM | 539 | O5'  | DA | 18 | 10.011 | -1.054 | 2.092  | 1.00 | 0.00 |
| ATOM | 540 | C5'  | DA | 18 | 9.531  | -1.576 | 0.837  | 1.00 | 0.00 |
| ATOM | 541 | H5'  | DA | 18 | 10.328 | -1.704 | 0.105  | 1.00 | 0.00 |
| ATOM | 542 | H5'' | DA | 18 | 8.854  | -0.856 | 0.379  | 1.00 | 0.00 |
| ATOM | 543 | C4'  | DA | 18 | 8.770  | -2.898 | 0.990  | 1.00 | 0.00 |
| ATOM | 544 | H4'  | DA | 18 | 9.364  | -3.662 | 1.491  | 1.00 | 0.00 |
| ATOM | 545 | O4'  | DA | 18 | 7.684  | -2.629 | 1.902  | 1.00 | 0.00 |
| ATOM | 546 | C1'  | DA | 18 | 6.676  | -3.603 | 1.700  | 1.00 | 0.00 |
| ATOM | 547 | H1'  | DA | 18 | 6.664  | -4.315 | 2.526  | 1.00 | 0.00 |
| ATOM | 548 | N9   | DA | 18 | 5.313  | -3.076 | 1.700  | 1.00 | 0.00 |
| ATOM | 549 | C8   | DA | 18 | 4.101  | -3.708 | 1.700  | 1.00 | 0.00 |
| ATOM | 550 | H8   | DA | 18 | 4.020  | -4.784 | 1.749  | 1.00 | 0.00 |
| ATOM | 551 | N7   | DA | 18 | 3.077  | -2.838 | 1.700  | 1.00 | 0.00 |
| ATOM | 552 | C5   | DA | 18 | 3.665  | -1.631 | 1.700  | 1.00 | 0.00 |
| ATOM | 553 | C6   | DA | 18 | 3.139  | -0.332 | 1.700  | 1.00 | 0.00 |
| ATOM | 554 | N6   | DA | 18 | 1.830  | -0.072 | 1.700  | 1.00 | 0.00 |
| ATOM | 555 | H61  | DA | 18 | 1.505  | 0.884  | 1.700  | 1.00 | 0.00 |
| ATOM | 556 | H62  | DA | 18 | 1.164  | -0.832 | 1.700  | 1.00 | 0.00 |
| ATOM | 557 | N1   | DA | 18 | 4.022  | 0.667  | 1.700  | 1.00 | 0.00 |
| ATOM | 558 | C2   | DA | 18 | 5.335  | 0.442  | 1.700  | 1.00 | 0.00 |
| ATOM | 559 | H2   | DA | 18 | 6.053  | 1.249  | 1.700  | 1.00 | 0.00 |
| ATOM | 560 | N3   | DA | 18 | 5.951  | -0.740 | 1.700  | 1.00 | 0.00 |
| ATOM | 561 | C4   | DA | 18 | 5.040  | -1.737 | 1.700  | 1.00 | 0.00 |
| ATOM | 562 | C3'  | DA | 18 | 7.990  | -3.404 | -0.244 | 1.00 | 0.00 |
| ATOM | 563 | H3'  | DA | 18 | 7.484  | -2.566 | -0.723 | 1.00 | 0.00 |
| ATOM | 564 | C2'  | DA | 18 | 6.966  | -4.311 | 0.398  | 1.00 | 0.00 |
| ATOM | 565 | H2'  | DA | 18 | 6.450  | -4.882 | -0.374 | 1.00 | 0.00 |
| ATOM | 566 | H2'' | DA | 18 | 7.465  | -4.996 | 1.083  | 1.00 | 0.00 |
| ATOM | 567 | O3'  | DA | 18 | 8.737  | -4.148 | -1.228 | 1.00 | 0.00 |
| ATOM | 568 | P    | DT | 19 | 9.040  | -5.735 | -1.161 | 1.00 | 0.00 |
| ATOM | 569 | OP1  | DT | 19 | 9.899  | -6.095 | -2.307 | 1.00 | 0.00 |
| ATOM | 570 | OP2  | DT | 19 | 9.622  | -6.034 | 0.169  | 1.00 | 0.00 |
| ATOM | 571 | O5'  | DT | 19 | 7.640  | -6.555 | -1.308 | 1.00 | 0.00 |
| ATOM | 572 | C5'  | DT | 19 | 6.948  | -6.712 | -2.563 | 1.00 | 0.00 |
| ATOM | 573 | H5'  | DT | 19 | 7.531  | -7.271 | -3.295 | 1.00 | 0.00 |
| ATOM | 574 | H5'' | DT | 19 | 6.800  | -5.734 | -3.022 | 1.00 | 0.00 |
| ATOM | 575 | C4'  | DT | 19 | 5.571  | -7.367 | -2.410 | 1.00 | 0.00 |
| ATOM | 576 | H4'  | DT | 19 | 5.627  | -8.333 | -1.909 | 1.00 | 0.00 |
| ATOM | 577 | O4'  | DT | 19 | 4.830  | -6.529 | -1.498 | 1.00 | 0.00 |
| ATOM | 578 | C1'  | DT | 19 | 3.447  | -6.758 | -1.700 | 1.00 | 0.00 |
| ATOM | 579 | H1'  | DT | 19 | 3.045  | -7.329 | -0.863 | 1.00 | 0.00 |
| ATOM | 580 | N1   | DT | 19 | 2.624  | -5.550 | -1.700 | 1.00 | 0.00 |
| ATOM | 581 | C6   | DT | 19 | 1.306  | -5.840 | -1.700 | 1.00 | 0.00 |
| ATOM | 582 | H6   | DT | 19 | 0.978  | -6.868 | -1.656 | 1.00 | 0.00 |
| ATOM | 583 | C5   | DT | 19 | 0.363  | -4.849 | -1.700 | 1.00 | 0.00 |
| ATOM | 584 | C7   | DT | 19 | -1.082 | -5.286 | -1.700 | 1.00 | 0.00 |
| ATOM | 585 | H71  | DT | 19 | -1.282 | -5.883 | -0.810 | 1.00 | 0.00 |
| ATOM | 586 | H72  | DT | 19 | -1.728 | -4.408 | -1.700 | 1.00 | 0.00 |
| ATOM | 587 | H73  | DT | 19 | -1.282 | -5.883 | -2.590 | 1.00 | 0.00 |
| ATOM | 588 | C4   | DT | 19 | 0.774  | -3.523 | -1.700 | 1.00 | 0.00 |
| ATOM | 589 | O4   | DT | 19 | 0.012  | -2.565 | -1.700 | 1.00 | 0.00 |
| ATOM | 590 | N3   | DT | 19 | 2.104  | -3.313 | -1.700 | 1.00 | 0.00 |
| ATOM | 591 | H3   | DT | 19 | 2.454  | -2.281 | -1.700 | 1.00 | 0.00 |
| ATOM | 592 | C2   | DT | 19 | 3.041  | -4.267 | -1.700 | 1.00 | 0.00 |
| ATOM | 593 | O2   | DT | 19 | 4.234  | -3.983 | -1.700 | 1.00 | 0.00 |
| ATOM | 594 | C3'  | DT | 19 | 4.641  | -7.341 | -3.644 | 1.00 | 0.00 |
| ATOM | 595 | H3'  | DT | 19 | 4.700  | -6.364 | -4.123 | 1.00 | 0.00 |
| ATOM | 596 | C2'  | DT | 19 | 3.284  | -7.505 | -3.002 | 1.00 | 0.00 |

|      |     |      |    |    |        |         |         |      |      |
|------|-----|------|----|----|--------|---------|---------|------|------|
| ATOM | 597 | H2'  | DT | 19 | 2.535  | -7.682  | -3.774  | 1.00 | 0.00 |
| ATOM | 598 | H2'' | DT | 19 | 3.306  | -8.352  | -2.317  | 1.00 | 0.00 |
| ATOM | 599 | O3'  | DT | 19 | 4.833  | -8.378  | -4.628  | 1.00 | 0.00 |
| ATOM | 600 | P    | DT | 20 | 4.181  | -9.856  | -4.561  | 1.00 | 0.00 |
| ATOM | 601 | OP1  | DT | 20 | 4.683  | -10.640 | -5.707  | 1.00 | 0.00 |
| ATOM | 602 | OP2  | DT | 20 | 4.490  | -10.432 | -3.231  | 1.00 | 0.00 |
| ATOM | 603 | O5'  | DT | 20 | 2.563  | -9.734  | -4.708  | 1.00 | 0.00 |
| ATOM | 604 | C5'  | DT | 20 | 1.904  | -9.470  | -5.963  | 1.00 | 0.00 |
| ATOM | 605 | H5'  | DT | 20 | 2.067  | -10.262 | -6.694  | 1.00 | 0.00 |
| ATOM | 606 | H5'' | DT | 20 | 2.337  | -8.581  | -6.422  | 1.00 | 0.00 |
| ATOM | 607 | C4'  | DT | 20 | 0.399  | -9.227  | -5.810  | 1.00 | 0.00 |
| ATOM | 608 | H4'  | DT | 20 | -0.104 | -10.054 | -5.309  | 1.00 | 0.00 |
| ATOM | 609 | O4'  | DT | 20 | 0.265  | -8.117  | -4.898  | 1.00 | 0.00 |
| ATOM | 610 | C1'  | DT | 20 | -1.003 | -7.519  | -5.100  | 1.00 | 0.00 |
| ATOM | 611 | H1'  | DT | 20 | -1.659 | -7.760  | -4.263  | 1.00 | 0.00 |
| ATOM | 612 | N1   | DT | 20 | -0.993 | -6.058  | -5.100  | 1.00 | 0.00 |
| ATOM | 613 | C6   | DT | 20 | -2.243 | -5.548  | -5.100  | 1.00 | 0.00 |
| ATOM | 614 | H6   | DT | 20 | -3.097 | -6.208  | -5.056  | 1.00 | 0.00 |
| ATOM | 615 | C5   | DT | 20 | -2.456 | -4.197  | -5.100  | 1.00 | 0.00 |
| ATOM | 616 | C7   | DT | 20 | -3.894 | -3.736  | -5.100  | 1.00 | 0.00 |
| ATOM | 617 | H71  | DT | 20 | -4.397 | -4.114  | -4.210  | 1.00 | 0.00 |
| ATOM | 618 | H72  | DT | 20 | -3.927 | -2.646  | -5.100  | 1.00 | 0.00 |
| ATOM | 619 | H73  | DT | 20 | -4.397 | -4.114  | -5.990  | 1.00 | 0.00 |
| ATOM | 620 | C4   | DT | 20 | -1.365 | -3.339  | -5.100  | 1.00 | 0.00 |
| ATOM | 621 | O4   | DT | 20 | -1.448 | -2.117  | -5.100  | 1.00 | 0.00 |
| ATOM | 622 | N3   | DT | 20 | -0.151 | -3.922  | -5.100  | 1.00 | 0.00 |
| ATOM | 623 | H3   | DT | 20 | 0.724  | -3.272  | -5.100  | 1.00 | 0.00 |
| ATOM | 624 | C2   | DT | 20 | 0.078  | -5.239  | -5.100  | 1.00 | 0.00 |
| ATOM | 625 | O2   | DT | 20 | 1.222  | -5.683  | -5.100  | 1.00 | 0.00 |
| ATOM | 626 | C3'  | DT | 20 | -0.351 | -8.678  | -7.044  | 1.00 | 0.00 |
| ATOM | 627 | H3'  | DT | 20 | 0.253  | -7.907  | -7.523  | 1.00 | 0.00 |
| ATOM | 628 | C2'  | DT | 20 | -1.562 | -8.042  | -6.402  | 1.00 | 0.00 |
| ATOM | 629 | H2'  | DT | 20 | -2.279 | -7.763  | -7.174  | 1.00 | 0.00 |
| ATOM | 630 | H2'' | DT | 20 | -2.025 | -8.751  | -5.716  | 1.00 | 0.00 |
| ATOM | 631 | O3'  | DT | 20 | -0.782 | -9.640  | -8.028  | 1.00 | 0.00 |
| ATOM | 632 | P    | DC | 21 | -2.159 | -10.486 | -7.961  | 1.00 | 0.00 |
| ATOM | 633 | OP1  | DC | 21 | -2.191 | -11.417 | -9.107  | 1.00 | 0.00 |
| ATOM | 634 | OP2  | DC | 21 | -2.231 | -11.136 | -6.631  | 1.00 | 0.00 |
| ATOM | 635 | O5'  | DC | 21 | -3.421 | -9.467  | -8.108  | 1.00 | 0.00 |
| ATOM | 636 | C5'  | DC | 21 | -3.813 | -8.875  | -9.363  | 1.00 | 0.00 |
| ATOM | 637 | H5'  | DC | 21 | -4.128 | -9.618  | -10.095 | 1.00 | 0.00 |
| ATOM | 638 | H5'' | DC | 21 | -2.951 | -8.389  | -9.821  | 1.00 | 0.00 |
| ATOM | 639 | C4'  | DC | 21 | -4.914 | -7.820  | -9.210  | 1.00 | 0.00 |
| ATOM | 640 | H4'  | DC | 21 | -5.798 | -8.214  | -8.709  | 1.00 | 0.00 |
| ATOM | 641 | O4'  | DC | 21 | -4.393 | -6.830  | -8.298  | 1.00 | 0.00 |
| ATOM | 642 | C1'  | DC | 21 | -5.097 | -5.618  | -8.500  | 1.00 | 0.00 |
| ATOM | 643 | H1'  | DC | 21 | -5.745 | -5.479  | -7.634  | 1.00 | 0.00 |
| ATOM | 644 | N1   | DC | 21 | -4.259 | -4.421  | -8.500  | 1.00 | 0.00 |
| ATOM | 645 | C6   | DC | 21 | -4.895 | -3.210  | -8.500  | 1.00 | 0.00 |
| ATOM | 646 | H6   | DC | 21 | -5.974 | -3.158  | -8.500  | 1.00 | 0.00 |
| ATOM | 647 | C5   | DC | 21 | -4.171 | -2.040  | -8.500  | 1.00 | 0.00 |
| ATOM | 648 | H5   | DC | 21 | -4.675 | -1.073  | -8.500  | 1.00 | 0.00 |
| ATOM | 649 | C4   | DC | 21 | -2.800 | -2.174  | -8.500  | 1.00 | 0.00 |
| ATOM | 650 | N4   | DC | 21 | -2.016 | -1.105  | -8.500  | 1.00 | 0.00 |
| ATOM | 651 | H41  | DC | 21 | -1.017 | -1.255  | -8.500  | 1.00 | 0.00 |
| ATOM | 652 | H42  | DC | 21 | -2.418 | -0.179  | -8.500  | 1.00 | 0.00 |
| ATOM | 653 | N3   | DC | 21 | -2.192 | -3.390  | -8.500  | 1.00 | 0.00 |
| ATOM | 654 | C2   | DC | 21 | -2.919 | -4.536  | -8.500  | 1.00 | 0.00 |
| ATOM | 655 | O2   | DC | 21 | -2.381 | -5.637  | -8.500  | 1.00 | 0.00 |
| ATOM | 656 | C3'  | DC | 21 | -5.219 | -6.942  | -10.444 | 1.00 | 0.00 |

|      |     |      |    |    |         |        |         |      |      |
|------|-----|------|----|----|---------|--------|---------|------|------|
| ATOM | 657 | H3'  | DC | 21 | -4.284  | -6.651 | -10.923 | 1.00 | 0.00 |
| ATOM | 658 | C2'  | DC | 21 | -5.854  | -5.731 | -9.802  | 1.00 | 0.00 |
| ATOM | 659 | H2'  | DC | 21 | -6.285  | -5.094 | -10.574 | 1.00 | 0.00 |
| ATOM | 660 | H2'' | DC | 21 | -6.638  | -6.052 | -9.117  | 1.00 | 0.00 |
| ATOM | 661 | O3'  | DC | 21 | -6.121  | -7.489 | -11.428 | 1.00 | 0.00 |
| ATOM | 662 | P    | DG | 22 | -7.734  | -7.403 | -11.361 | 1.00 | 0.00 |
| ATOM | 663 | OP1  | DG | 22 | -8.289  | -8.151 | -12.507 | 1.00 | 0.00 |
| ATOM | 664 | OP2  | DG | 22 | -8.163  | -7.896 | -10.031 | 1.00 | 0.00 |
| ATOM | 665 | O5'  | DG | 22 | -8.194  | -5.847 | -11.508 | 1.00 | 0.00 |
| ATOM | 666 | C5'  | DG | 22 | -8.181  | -5.137 | -12.763 | 1.00 | 0.00 |
| ATOM | 667 | H5'  | DG | 22 | -8.863  | -5.569 | -13.495 | 1.00 | 0.00 |
| ATOM | 668 | H5'' | DG | 22 | -7.196  | -5.227 | -13.222 | 1.00 | 0.00 |
| ATOM | 669 | C4'  | DG | 22 | -8.487  | -3.644 | -12.610 | 1.00 | 0.00 |
| ATOM | 670 | H4'  | DG | 22 | -9.439  | -3.466 | -12.109 | 1.00 | 0.00 |
| ATOM | 671 | O4'  | DG | 22 | -7.496  | -3.125 | -11.698 | 1.00 | 0.00 |
| ATOM | 672 | C1'  | DG | 22 | -7.387  | -1.727 | -11.900 | 1.00 | 0.00 |
| ATOM | 673 | H1'  | DG | 22 | -7.842  | -1.244 | -11.035 | 1.00 | 0.00 |
| ATOM | 674 | N9   | DG | 22 | -6.017  | -1.218 | -11.900 | 1.00 | 0.00 |
| ATOM | 675 | C8   | DG | 22 | -5.634  | 0.103  | -11.900 | 1.00 | 0.00 |
| ATOM | 676 | H8   | DG | 22 | -6.351  | 0.911  | -11.902 | 1.00 | 0.00 |
| ATOM | 677 | N7   | DG | 22 | -4.300  | 0.233  | -11.900 | 1.00 | 0.00 |
| ATOM | 678 | C5   | DG | 22 | -3.864  | -1.042 | -11.900 | 1.00 | 0.00 |
| ATOM | 679 | C6   | DG | 22 | -2.555  | -1.550 | -11.900 | 1.00 | 0.00 |
| ATOM | 680 | O6   | DG | 22 | -1.493  | -0.925 | -11.900 | 1.00 | 0.00 |
| ATOM | 681 | N1   | DG | 22 | -2.542  | -2.924 | -11.900 | 1.00 | 0.00 |
| ATOM | 682 | H1   | DG | 22 | -1.634  | -3.343 | -11.900 | 1.00 | 0.00 |
| ATOM | 683 | C2   | DG | 22 | -3.617  | -3.758 | -11.900 | 1.00 | 0.00 |
| ATOM | 684 | N2   | DG | 22 | -3.391  | -5.075 | -11.900 | 1.00 | 0.00 |
| ATOM | 685 | H21  | DG | 22 | -2.493  | -5.538 | -11.912 | 1.00 | 0.00 |
| ATOM | 686 | H22  | DG | 22 | -4.205  | -5.672 | -11.909 | 1.00 | 0.00 |
| ATOM | 687 | N3   | DG | 22 | -4.861  | -3.286 | -11.900 | 1.00 | 0.00 |
| ATOM | 688 | C4   | DG | 22 | -4.899  | -1.948 | -11.900 | 1.00 | 0.00 |
| ATOM | 689 | C3'  | DG | 22 | -8.239  | -2.748 | -13.844 | 1.00 | 0.00 |
| ATOM | 690 | H3'  | DG | 22 | -7.305  | -3.040 | -14.323 | 1.00 | 0.00 |
| ATOM | 691 | C2'  | DG | 22 | -8.073  | -1.390 | -13.202 | 1.00 | 0.00 |
| ATOM | 692 | H2'  | DG | 22 | -8.065  | -0.621 | -13.974 | 1.00 | 0.00 |
| ATOM | 693 | H2'' | DG | 22 | -8.901  | -1.208 | -12.517 | 1.00 | 0.00 |
| ATOM | 694 | O3'  | DG | 22 | -9.292  | -2.686 | -14.828 | 1.00 | 0.00 |
| ATOM | 695 | P    | DC | 23 | -10.570 | -1.698 | -14.761 | 1.00 | 0.00 |
| ATOM | 696 | OP1  | DC | 23 | -11.452 | -1.998 | -15.907 | 1.00 | 0.00 |
| ATOM | 697 | OP2  | DC | 23 | -11.204 | -1.861 | -13.431 | 1.00 | 0.00 |
| ATOM | 698 | O5'  | DC | 23 | -10.065 | -0.157 | -14.908 | 1.00 | 0.00 |
| ATOM | 699 | C5'  | DC | 23 | -9.651  | 0.420  | -16.163 | 1.00 | 0.00 |
| ATOM | 700 | H5'  | DC | 23 | -10.459 | 0.452  | -16.894 | 1.00 | 0.00 |
| ATOM | 701 | H5'' | DC | 23 | -8.892  | -0.214 | -16.622 | 1.00 | 0.00 |
| ATOM | 702 | C4'  | DC | 23 | -9.054  | 1.823  | -16.010 | 1.00 | 0.00 |
| ATOM | 703 | H4'  | DC | 23 | -9.736  | 2.510  | -15.509 | 1.00 | 0.00 |
| ATOM | 704 | O4'  | DC | 23 | -7.944  | 1.687  | -15.098 | 1.00 | 0.00 |
| ATOM | 705 | C1'  | DC | 23 | -7.060  | 2.775  | -15.300 | 1.00 | 0.00 |
| ATOM | 706 | H1'  | DC | 23 | -7.160  | 3.430  | -14.434 | 1.00 | 0.00 |
| ATOM | 707 | N1   | DC | 23 | -5.644  | 2.416  | -15.300 | 1.00 | 0.00 |
| ATOM | 708 | C6   | DC | 23 | -4.737  | 3.439  | -15.300 | 1.00 | 0.00 |
| ATOM | 709 | H6   | DC | 23 | -5.071  | 4.466  | -15.300 | 1.00 | 0.00 |
| ATOM | 710 | C5   | DC | 23 | -3.386  | 3.177  | -15.300 | 1.00 | 0.00 |
| ATOM | 711 | H5   | DC | 23 | -2.661  | 3.991  | -15.300 | 1.00 | 0.00 |
| ATOM | 712 | C4   | DC | 23 | -3.025  | 1.848  | -15.300 | 1.00 | 0.00 |
| ATOM | 713 | N4   | DC | 23 | -1.748  | 1.494  | -15.300 | 1.00 | 0.00 |
| ATOM | 714 | H41  | DC | 23 | -1.534  | 0.507  | -15.300 | 1.00 | 0.00 |
| ATOM | 715 | H42  | DC | 23 | -1.024  | 2.199  | -15.300 | 1.00 | 0.00 |
| ATOM | 716 | N3   | DC | 23 | -3.947  | 0.849  | -15.300 | 1.00 | 0.00 |



## IIRb

|      |    |      |     |   |         |        |         |      |      |
|------|----|------|-----|---|---------|--------|---------|------|------|
| ATOM | 1  | HO5' | DC5 | 1 | -9.975  | -1.225 | -18.921 | 1.00 | 0.00 |
| ATOM | 2  | O5'  | DC5 | 1 | -9.474  | -2.004 | -19.172 | 1.00 | 0.00 |
| ATOM | 3  | C5'  | DC5 | 1 | -9.311  | -3.053 | -18.227 | 1.00 | 0.00 |
| ATOM | 4  | H5'  | DC5 | 1 | -10.291 | -3.413 | -17.914 | 1.00 | 0.00 |
| ATOM | 5  | H5'' | DC5 | 1 | -8.795  | -2.617 | -17.372 | 1.00 | 0.00 |
| ATOM | 6  | C4'  | DC5 | 1 | -8.499  | -4.218 | -18.759 | 1.00 | 0.00 |
| ATOM | 7  | H4'  | DC5 | 1 | -8.987  | -4.746 | -19.578 | 1.00 | 0.00 |
| ATOM | 8  | O4'  | DC5 | 1 | -7.257  | -3.702 | -19.344 | 1.00 | 0.00 |
| ATOM | 9  | C1'  | DC5 | 1 | -6.194  | -4.379 | -18.700 | 1.00 | 0.00 |
| ATOM | 10 | H1'  | DC5 | 1 | -6.006  | -5.280 | -19.284 | 1.00 | 0.00 |
| ATOM | 11 | N1   | DC5 | 1 | -4.905  | -3.692 | -18.700 | 1.00 | 0.00 |
| ATOM | 12 | C6   | DC5 | 1 | -3.780  | -4.470 | -18.700 | 1.00 | 0.00 |
| ATOM | 13 | H6   | DC5 | 1 | -3.860  | -5.547 | -18.700 | 1.00 | 0.00 |
| ATOM | 14 | C5   | DC5 | 1 | -2.530  | -3.893 | -18.700 | 1.00 | 0.00 |
| ATOM | 15 | H5   | DC5 | 1 | -1.631  | -4.510 | -18.700 | 1.00 | 0.00 |
| ATOM | 16 | C4   | DC5 | 1 | -2.497  | -2.516 | -18.700 | 1.00 | 0.00 |
| ATOM | 17 | N4   | DC5 | 1 | -1.341  | -1.867 | -18.700 | 1.00 | 0.00 |
| ATOM | 18 | H41  | DC5 | 1 | -1.369  | -0.857 | -18.700 | 1.00 | 0.00 |
| ATOM | 19 | H42  | DC5 | 1 | -0.470  | -2.378 | -18.700 | 1.00 | 0.00 |
| ATOM | 20 | N3   | DC5 | 1 | -3.630  | -1.765 | -18.700 | 1.00 | 0.00 |
| ATOM | 21 | C2   | DC5 | 1 | -4.856  | -2.348 | -18.700 | 1.00 | 0.00 |
| ATOM | 22 | O2   | DC5 | 1 | -5.884  | -1.680 | -18.700 | 1.00 | 0.00 |
| ATOM | 23 | C3'  | DC5 | 1 | -8.040  | -5.159 | -17.630 | 1.00 | 0.00 |
| ATOM | 24 | H3'  | DC5 | 1 | -8.666  | -5.232 | -16.740 | 1.00 | 0.00 |
| ATOM | 25 | C2'  | DC5 | 1 | -6.741  | -4.467 | -17.278 | 1.00 | 0.00 |
| ATOM | 26 | H2'  | DC5 | 1 | -6.898  | -3.812 | -16.421 | 1.00 | 0.00 |
| ATOM | 27 | H2'' | DC5 | 1 | -5.986  | -5.214 | -17.030 | 1.00 | 0.00 |
| ATOM | 28 | O3'  | DC5 | 1 | -7.715  | -6.464 | -18.126 | 1.00 | 0.00 |
| ATOM | 29 | P    | DG  | 2 | -7.384  | -7.691 | -17.136 | 1.00 | 0.00 |
| ATOM | 30 | OP1  | DG  | 2 | -6.538  | -8.670 | -17.855 | 1.00 | 0.00 |
| ATOM | 31 | OP2  | DG  | 2 | -8.645  | -8.216 | -16.562 | 1.00 | 0.00 |
| ATOM | 32 | O5'  | DG  | 2 | -6.659  | -7.032 | -15.772 | 1.00 | 0.00 |
| ATOM | 33 | C5'  | DG  | 2 | -5.928  | -7.802 | -14.827 | 1.00 | 0.00 |
| ATOM | 34 | H5'  | DG  | 2 | -6.530  | -8.655 | -14.513 | 1.00 | 0.00 |
| ATOM | 35 | H5'' | DG  | 2 | -5.722  | -7.196 | -13.945 | 1.00 | 0.00 |
| ATOM | 36 | C4'  | DG  | 2 | -4.598  | -8.300 | -15.359 | 1.00 | 0.00 |
| ATOM | 37 | H4'  | DG  | 2 | -4.700  | -9.013 | -16.178 | 1.00 | 0.00 |
| ATOM | 38 | O4'  | DG  | 2 | -3.869  | -7.170 | -15.944 | 1.00 | 0.00 |
| ATOM | 39 | C1'  | DG  | 2 | -2.610  | -7.123 | -15.300 | 1.00 | 0.00 |
| ATOM | 40 | H1'  | DG  | 2 | -1.943  | -7.759 | -15.882 | 1.00 | 0.00 |
| ATOM | 41 | N9   | DG  | 2 | -1.938  | -5.825 | -15.300 | 1.00 | 0.00 |
| ATOM | 42 | C8   | DG  | 2 | -0.580  | -5.605 | -15.300 | 1.00 | 0.00 |
| ATOM | 43 | H8   | DG  | 2 | 0.136   | -6.414 | -15.298 | 1.00 | 0.00 |
| ATOM | 44 | N7   | DG  | 2 | -0.290  | -4.296 | -15.300 | 1.00 | 0.00 |
| ATOM | 45 | C5   | DG  | 2 | -1.503  | -3.709 | -15.300 | 1.00 | 0.00 |
| ATOM | 46 | C6   | DG  | 2 | -1.849  | -2.349 | -15.300 | 1.00 | 0.00 |
| ATOM | 47 | O6   | DG  | 2 | -1.099  | -1.370 | -15.300 | 1.00 | 0.00 |
| ATOM | 48 | N1   | DG  | 2 | -3.210  | -2.169 | -15.300 | 1.00 | 0.00 |
| ATOM | 49 | H1   | DG  | 2 | -3.516  | -1.217 | -15.300 | 1.00 | 0.00 |
| ATOM | 50 | C2   | DG  | 2 | -4.169  | -3.135 | -15.300 | 1.00 | 0.00 |
| ATOM | 51 | N2   | DG  | 2 | -5.449  | -2.751 | -15.300 | 1.00 | 0.00 |
| ATOM | 52 | H21  | DG  | 2 | -5.799  | -1.804 | -15.288 | 1.00 | 0.00 |
| ATOM | 53 | H22  | DG  | 2 | -6.141  | -3.487 | -15.291 | 1.00 | 0.00 |
| ATOM | 54 | N3   | DG  | 2 | -3.850  | -4.427 | -15.300 | 1.00 | 0.00 |
| ATOM | 55 | C4   | DG  | 2 | -2.527  | -4.627 | -15.300 | 1.00 | 0.00 |
| ATOM | 56 | C3'  | DG  | 2 | -3.686  | -8.813 | -14.230 | 1.00 | 0.00 |
| ATOM | 57 | H3'  | DG  | 2 | -4.159  | -9.228 | -13.340 | 1.00 | 0.00 |



|      |     |      |    |   |        |         |         |      |      |
|------|-----|------|----|---|--------|---------|---------|------|------|
| ATOM | 58  | C2'  | DG | 2 | -3.010 | -7.506  | -13.878 | 1.00 | 0.00 |
| ATOM | 59  | H2'  | DG | 2 | -3.511 | -7.056  | -13.021 | 1.00 | 0.00 |
| ATOM | 60  | H2'' | DG | 2 | -1.965 | -7.692  | -13.630 | 1.00 | 0.00 |
| ATOM | 61  | O3'  | DG | 2 | -2.677 | -9.702  | -14.726 | 1.00 | 0.00 |
| ATOM | 62  | P    | DC | 3 | -1.708 | -10.524 | -13.736 | 1.00 | 0.00 |
| ATOM | 63  | OP1  | DC | 3 | -0.454 | -10.849 | -14.455 | 1.00 | 0.00 |
| ATOM | 64  | OP2  | DC | 3 | -2.446 | -11.672 | -13.162 | 1.00 | 0.00 |
| ATOM | 65  | O5'  | DC | 3 | -1.485 | -9.570  | -12.372 | 1.00 | 0.00 |
| ATOM | 66  | C5'  | DC | 3 | -0.446 | -9.789  | -11.427 | 1.00 | 0.00 |
| ATOM | 67  | H5'  | DC | 3 | -0.457 | -10.833 | -11.115 | 1.00 | 0.00 |
| ATOM | 68  | H5'' | DC | 3 | -0.621 | -9.174  | -10.544 | 1.00 | 0.00 |
| ATOM | 69  | C4'  | DC | 3 | 0.932  | -9.442  | -11.959 | 1.00 | 0.00 |
| ATOM | 70  | H4'  | DC | 3 | 1.253  | -10.086 | -12.778 | 1.00 | 0.00 |
| ATOM | 71  | O4'  | DC | 3 | 0.889  | -8.098  | -12.544 | 1.00 | 0.00 |
| ATOM | 72  | C1'  | DC | 3 | 1.899  | -7.344  | -11.900 | 1.00 | 0.00 |
| ATOM | 73  | H1'  | DC | 3 | 2.808  | -7.488  | -12.484 | 1.00 | 0.00 |
| ATOM | 74  | N1   | DC | 3 | 1.714  | -5.895  | -11.900 | 1.00 | 0.00 |
| ATOM | 75  | C6   | DC | 3 | 2.840  | -5.119  | -11.900 | 1.00 | 0.00 |
| ATOM | 76  | H6   | DC | 3 | 3.819  | -5.575  | -11.900 | 1.00 | 0.00 |
| ATOM | 77  | C5   | DC | 3 | 2.743  | -3.746  | -11.900 | 1.00 | 0.00 |
| ATOM | 78  | H5   | DC | 3 | 3.638  | -3.124  | -11.900 | 1.00 | 0.00 |
| ATOM | 79  | C4   | DC | 3 | 1.467  | -3.227  | -11.900 | 1.00 | 0.00 |
| ATOM | 80  | N4   | DC | 3 | 1.271  | -1.916  | -11.900 | 1.00 | 0.00 |
| ATOM | 81  | H41  | DC | 3 | 0.317  | -1.584  | -11.900 | 1.00 | 0.00 |
| ATOM | 82  | H42  | DC | 3 | 2.058  | -1.284  | -11.900 | 1.00 | 0.00 |
| ATOM | 83  | N3   | DC | 3 | 0.364  | -4.021  | -11.900 | 1.00 | 0.00 |
| ATOM | 84  | C2   | DC | 3 | 0.475  | -5.373  | -11.900 | 1.00 | 0.00 |
| ATOM | 85  | O2   | DC | 3 | -0.514 | -6.097  | -11.900 | 1.00 | 0.00 |
| ATOM | 86  | C3'  | DC | 3 | 1.974  | -9.347  | -10.830 | 1.00 | 0.00 |
| ATOM | 87  | H3'  | DC | 3 | 1.820  | -9.958  | -9.940  | 1.00 | 0.00 |
| ATOM | 88  | C2'  | DC | 3 | 1.788  | -7.887  | -10.478 | 1.00 | 0.00 |
| ATOM | 89  | H2'  | DC | 3 | 1.120  | -7.802  | -9.621  | 1.00 | 0.00 |
| ATOM | 90  | H2'' | DC | 3 | 2.754  | -7.447  | -10.230 | 1.00 | 0.00 |
| ATOM | 91  | O3'  | DC | 3 | 3.309  | -9.505  | -11.326 | 1.00 | 0.00 |
| ATOM | 92  | P    | DG | 4 | 4.574  | -9.631  | -10.336 | 1.00 | 0.00 |
| ATOM | 93  | OP1  | DG | 4 | 5.790  | -9.187  | -11.055 | 1.00 | 0.00 |
| ATOM | 94  | OP2  | DG | 4 | 4.618  | -10.996 | -9.762  | 1.00 | 0.00 |
| ATOM | 95  | O5'  | DG | 4 | 4.215  | -8.719  | -8.972  | 1.00 | 0.00 |
| ATOM | 96  | C5'  | DG | 4 | 5.194  | -8.309  | -8.027  | 1.00 | 0.00 |
| ATOM | 97  | H5'  | DG | 4 | 5.778  | -9.175  | -7.714  | 1.00 | 0.00 |
| ATOM | 98  | H5'' | DG | 4 | 4.700  | -7.902  | -7.145  | 1.00 | 0.00 |
| ATOM | 99  | C4'  | DG | 4 | 6.131  | -7.241  | -8.559  | 1.00 | 0.00 |
| ATOM | 100 | H4'  | DG | 4 | 6.761  | -7.589  | -9.378  | 1.00 | 0.00 |
| ATOM | 101 | O4'  | DG | 4 | 5.333  | -6.159  | -9.144  | 1.00 | 0.00 |
| ATOM | 102 | C1'  | DG | 4 | 5.735  | -4.965  | -8.500  | 1.00 | 0.00 |
| ATOM | 103 | H1'  | DG | 4 | 6.566  | -4.566  | -9.082  | 1.00 | 0.00 |
| ATOM | 104 | N9   | DG | 4 | 4.760  | -3.877  | -8.500  | 1.00 | 0.00 |
| ATOM | 105 | C8   | DG | 4 | 5.035  | -2.529  | -8.500  | 1.00 | 0.00 |
| ATOM | 106 | H8   | DG | 4 | 6.045  | -2.147  | -8.498  | 1.00 | 0.00 |
| ATOM | 107 | N7   | DG | 4 | 3.915  | -1.794  | -8.500  | 1.00 | 0.00 |
| ATOM | 108 | C5   | DG | 4 | 2.935  | -2.720  | -8.500  | 1.00 | 0.00 |
| ATOM | 109 | C6   | DG | 4 | 1.541  | -2.561  | -8.500  | 1.00 | 0.00 |
| ATOM | 110 | O6   | DG | 4 | 0.891  | -1.513  | -8.500  | 1.00 | 0.00 |
| ATOM | 111 | N1   | DG | 4 | 0.890  | -3.770  | -8.500  | 1.00 | 0.00 |
| ATOM | 112 | H1   | DG | 4 | -0.109 | -3.718  | -8.500  | 1.00 | 0.00 |
| ATOM | 113 | C2   | DG | 4 | 1.453  | -5.009  | -8.500  | 1.00 | 0.00 |
| ATOM | 114 | N2   | DG | 4 | 0.641  | -6.070  | -8.500  | 1.00 | 0.00 |
| ATOM | 115 | H21  | DG | 4 | -0.369 | -6.063  | -8.488  | 1.00 | 0.00 |
| ATOM | 116 | H22  | DG | 4 | 1.084  | -6.977  | -8.491  | 1.00 | 0.00 |
| ATOM | 117 | N3   | DG | 4 | 2.774  | -5.170  | -8.500  | 1.00 | 0.00 |

|      |     |      |    |   |        |        |        |      |      |
|------|-----|------|----|---|--------|--------|--------|------|------|
| ATOM | 118 | C4   | DG | 4 | 3.431  | -4.003 | -8.500 | 1.00 | 0.00 |
| ATOM | 119 | C3'  | DG | 4 | 6.935  | -6.570 | -7.430 | 1.00 | 0.00 |
| ATOM | 120 | H3'  | DG | 4 | 7.156  | -7.160 | -6.540 | 1.00 | 0.00 |
| ATOM | 121 | C2'  | DG | 4 | 5.952  | -5.475 | -7.078 | 1.00 | 0.00 |
| ATOM | 122 | H2'  | DG | 4 | 5.354  | -5.785 | -6.221 | 1.00 | 0.00 |
| ATOM | 123 | H2'' | DG | 4 | 6.496  | -4.563 | -6.831 | 1.00 | 0.00 |
| ATOM | 124 | O3'  | DG | 4 | 8.124  | -5.942 | -7.926 | 1.00 | 0.00 |
| ATOM | 125 | P    | DA | 5 | 9.236  | -5.327 | -6.936 | 1.00 | 0.00 |
| ATOM | 126 | OP1  | DA | 5 | 9.984  | -4.270 | -7.655 | 1.00 | 0.00 |
| ATOM | 127 | OP2  | DA | 5 | 10.047 | -6.425 | -6.362 | 1.00 | 0.00 |
| ATOM | 128 | O5'  | DA | 5 | 8.422  | -4.780 | -5.572 | 1.00 | 0.00 |
| ATOM | 129 | C5'  | DA | 5 | 8.995  | -3.887 | -4.627 | 1.00 | 0.00 |
| ATOM | 130 | H5'  | DA | 5 | 9.968  | -4.268 | -4.315 | 1.00 | 0.00 |
| ATOM | 131 | H5'' | DA | 5 | 8.358  | -3.833 | -3.744 | 1.00 | 0.00 |
| ATOM | 132 | C4'  | DA | 5 | 9.159  | -2.476 | -5.159 | 1.00 | 0.00 |
| ATOM | 133 | H4'  | DA | 5 | 9.875  | -2.405 | -5.978 | 1.00 | 0.00 |
| ATOM | 134 | O4'  | DA | 5 | 7.888  | -2.039 | -5.744 | 1.00 | 0.00 |
| ATOM | 135 | C1'  | DA | 5 | 7.541  | -0.827 | -5.100 | 1.00 | 0.00 |
| ATOM | 136 | H1'  | DA | 5 | 7.994  | 0.014  | -5.625 | 1.00 | 0.00 |
| ATOM | 137 | N9   | DA | 5 | 6.120  | -0.487 | -5.100 | 1.00 | 0.00 |
| ATOM | 138 | C8   | DA | 5 | 5.482  | 0.722  | -5.100 | 1.00 | 0.00 |
| ATOM | 139 | H8   | DA | 5 | 6.026  | 1.654  | -5.149 | 1.00 | 0.00 |
| ATOM | 140 | N7   | DA | 5 | 4.145  | 0.587  | -5.100 | 1.00 | 0.00 |
| ATOM | 141 | C5   | DA | 5 | 3.943  | -0.740 | -5.100 | 1.00 | 0.00 |
| ATOM | 142 | C6   | DA | 5 | 2.772  | -1.510 | -5.100 | 1.00 | 0.00 |
| ATOM | 143 | N6   | DA | 5 | 1.546  | -0.980 | -5.100 | 1.00 | 0.00 |
| ATOM | 144 | H61  | DA | 5 | 0.735  | -1.582 | -5.100 | 1.00 | 0.00 |
| ATOM | 145 | H62  | DA | 5 | 1.430  | 0.023  | -5.100 | 1.00 | 0.00 |
| ATOM | 146 | N1   | DA | 5 | 2.931  | -2.834 | -5.100 | 1.00 | 0.00 |
| ATOM | 147 | C2   | DA | 5 | 4.139  | -3.395 | -5.100 | 1.00 | 0.00 |
| ATOM | 148 | H2   | DA | 5 | 4.271  | -4.467 | -5.100 | 1.00 | 0.00 |
| ATOM | 149 | N3   | DA | 5 | 5.318  | -2.772 | -5.100 | 1.00 | 0.00 |
| ATOM | 150 | C4   | DA | 5 | 5.134  | -1.434 | -5.100 | 1.00 | 0.00 |
| ATOM | 151 | C3'  | DA | 5 | 9.440  | -1.467 | -4.030 | 1.00 | 0.00 |
| ATOM | 152 | H3'  | DA | 5 | 9.957  | -1.827 | -3.140 | 1.00 | 0.00 |
| ATOM | 153 | C2'  | DA | 5 | 8.009  | -1.124 | -3.678 | 1.00 | 0.00 |
| ATOM | 154 | H2'  | DA | 5 | 7.693  | -1.719 | -2.821 | 1.00 | 0.00 |
| ATOM | 155 | H2'' | DA | 5 | 7.939  | -0.065 | -3.430 | 1.00 | 0.00 |
| ATOM | 156 | O3'  | DA | 5 | 10.061 | -0.275 | -4.526 | 1.00 | 0.00 |
| ATOM | 157 | P    | DA | 6 | 10.627 | 0.863  | -3.536 | 1.00 | 0.00 |
| ATOM | 158 | OP1  | DA | 6 | 10.642 | 2.158  | -4.255 | 1.00 | 0.00 |
| ATOM | 159 | OP2  | DA | 6 | 11.919 | 0.421  | -2.962 | 1.00 | 0.00 |
| ATOM | 160 | O5'  | DA | 6 | 9.647  | 0.851  | -2.172 | 1.00 | 0.00 |
| ATOM | 161 | C5'  | DA | 6 | 9.611  | 1.912  | -1.227 | 1.00 | 0.00 |
| ATOM | 162 | H5'  | DA | 6 | 10.628 | 2.152  | -0.915 | 1.00 | 0.00 |
| ATOM | 163 | H5'' | DA | 6 | 9.056  | 1.594  | -0.344 | 1.00 | 0.00 |
| ATOM | 164 | C4'  | DA | 6 | 8.944  | 3.166  | -1.759 | 1.00 | 0.00 |
| ATOM | 165 | H4'  | DA | 6 | 9.493  | 3.632  | -2.578 | 1.00 | 0.00 |
| ATOM | 166 | O4'  | DA | 6 | 7.649  | 2.803  | -2.344 | 1.00 | 0.00 |
| ATOM | 167 | C1'  | DA | 6 | 6.676  | 3.603  | -1.700 | 1.00 | 0.00 |
| ATOM | 168 | H1'  | DA | 6 | 6.572  | 4.553  | -2.225 | 1.00 | 0.00 |
| ATOM | 169 | N9   | DA | 6 | 5.313  | 3.076  | -1.700 | 1.00 | 0.00 |
| ATOM | 170 | C8   | DA | 6 | 4.101  | 3.708  | -1.700 | 1.00 | 0.00 |
| ATOM | 171 | H8   | DA | 6 | 4.020  | 4.784  | -1.749 | 1.00 | 0.00 |
| ATOM | 172 | N7   | DA | 6 | 3.077  | 2.838  | -1.700 | 1.00 | 0.00 |
| ATOM | 173 | C5   | DA | 6 | 3.665  | 1.631  | -1.700 | 1.00 | 0.00 |
| ATOM | 174 | C6   | DA | 6 | 3.139  | 0.332  | -1.700 | 1.00 | 0.00 |
| ATOM | 175 | N6   | DA | 6 | 1.830  | 0.072  | -1.700 | 1.00 | 0.00 |
| ATOM | 176 | H61  | DA | 6 | 1.505  | -0.884 | -1.700 | 1.00 | 0.00 |
| ATOM | 177 | H62  | DA | 6 | 1.164  | 0.832  | -1.700 | 1.00 | 0.00 |

|      |     |      |    |   |        |        |        |      |      |
|------|-----|------|----|---|--------|--------|--------|------|------|
| ATOM | 178 | N1   | DA | 6 | 4.022  | -0.667 | -1.700 | 1.00 | 0.00 |
| ATOM | 179 | C2   | DA | 6 | 5.335  | -0.442 | -1.700 | 1.00 | 0.00 |
| ATOM | 180 | H2   | DA | 6 | 6.053  | -1.249 | -1.700 | 1.00 | 0.00 |
| ATOM | 181 | N3   | DA | 6 | 5.951  | 0.740  | -1.700 | 1.00 | 0.00 |
| ATOM | 182 | C4   | DA | 6 | 5.040  | 1.737  | -1.700 | 1.00 | 0.00 |
| ATOM | 183 | C3'  | DA | 6 | 8.602  | 4.156  | -0.630 | 1.00 | 0.00 |
| ATOM | 184 | H3'  | DA | 6 | 9.232  | 4.153  | 0.260  | 1.00 | 0.00 |
| ATOM | 185 | C2'  | DA | 6 | 7.229  | 3.625  | -0.278 | 1.00 | 0.00 |
| ATOM | 186 | H2'  | DA | 6 | 7.306  | 2.956  | 0.579  | 1.00 | 0.00 |
| ATOM | 187 | H2'' | DA | 6 | 6.570  | 4.457  | -0.031 | 1.00 | 0.00 |
| ATOM | 188 | O3'  | DA | 6 | 8.436  | 5.490  | -1.126 | 1.00 | 0.00 |
| ATOM | 189 | P    | DT | 7 | 8.255  | 6.748  | -0.136 | 1.00 | 0.00 |
| ATOM | 190 | OP1  | DT | 7 | 7.532  | 7.822  | -0.855 | 1.00 | 0.00 |
| ATOM | 191 | OP2  | DT | 7 | 9.569  | 7.118  | 0.438  | 1.00 | 0.00 |
| ATOM | 192 | O5'  | DT | 7 | 7.455  | 6.181  | 1.228  | 1.00 | 0.00 |
| ATOM | 193 | C5'  | DT | 7 | 6.823  | 7.033  | 2.173  | 1.00 | 0.00 |
| ATOM | 194 | H5'  | DT | 7 | 7.524  | 7.807  | 2.485  | 1.00 | 0.00 |
| ATOM | 195 | H5'' | DT | 7 | 6.547  | 6.456  | 3.055  | 1.00 | 0.00 |
| ATOM | 196 | C4'  | DT | 7 | 5.561  | 7.687  | 1.641  | 1.00 | 0.00 |
| ATOM | 197 | H4'  | DT | 7 | 5.748  | 8.382  | 0.822  | 1.00 | 0.00 |
| ATOM | 198 | O4'  | DT | 7 | 4.702  | 6.653  | 1.056  | 1.00 | 0.00 |
| ATOM | 199 | C1'  | DT | 7 | 3.447  | 6.758  | 1.700  | 1.00 | 0.00 |
| ATOM | 200 | H1'  | DT | 7 | 2.829  | 7.476  | 1.160  | 1.00 | 0.00 |
| ATOM | 201 | N1   | DT | 7 | 2.624  | 5.550  | 1.700  | 1.00 | 0.00 |
| ATOM | 202 | C6   | DT | 7 | 1.306  | 5.840  | 1.700  | 1.00 | 0.00 |
| ATOM | 203 | H6   | DT | 7 | 0.978  | 6.868  | 1.656  | 1.00 | 0.00 |
| ATOM | 204 | C5   | DT | 7 | 0.363  | 4.849  | 1.700  | 1.00 | 0.00 |
| ATOM | 205 | C7   | DT | 7 | -1.082 | 5.286  | 1.700  | 1.00 | 0.00 |
| ATOM | 206 | H71  | DT | 7 | -1.282 | 5.883  | 0.810  | 1.00 | 0.00 |
| ATOM | 207 | H72  | DT | 7 | -1.728 | 4.408  | 1.700  | 1.00 | 0.00 |
| ATOM | 208 | H73  | DT | 7 | -1.282 | 5.883  | 2.590  | 1.00 | 0.00 |
| ATOM | 209 | C4   | DT | 7 | 0.774  | 3.523  | 1.700  | 1.00 | 0.00 |
| ATOM | 210 | O4   | DT | 7 | 0.012  | 2.565  | 1.700  | 1.00 | 0.00 |
| ATOM | 211 | N3   | DT | 7 | 2.104  | 3.313  | 1.700  | 1.00 | 0.00 |
| ATOM | 212 | H3   | DT | 7 | 2.454  | 2.281  | 1.700  | 1.00 | 0.00 |
| ATOM | 213 | C2   | DT | 7 | 3.041  | 4.267  | 1.700  | 1.00 | 0.00 |
| ATOM | 214 | O2   | DT | 7 | 4.234  | 3.983  | 1.700  | 1.00 | 0.00 |
| ATOM | 215 | C3'  | DT | 7 | 4.718  | 8.307  | 2.770  | 1.00 | 0.00 |
| ATOM | 216 | H3'  | DT | 7 | 5.238  | 8.662  | 3.660  | 1.00 | 0.00 |
| ATOM | 217 | C2'  | DT | 7 | 3.890  | 7.090  | 3.122  | 1.00 | 0.00 |
| ATOM | 218 | H2'  | DT | 7 | 4.334  | 6.583  | 3.979  | 1.00 | 0.00 |
| ATOM | 219 | H2'' | DT | 7 | 2.875  | 7.400  | 3.370  | 1.00 | 0.00 |
| ATOM | 220 | O3'  | DT | 7 | 3.823  | 9.311  | 2.274  | 1.00 | 0.00 |
| ATOM | 221 | P    | DT | 8 | 2.960  | 10.243 | 3.264  | 1.00 | 0.00 |
| ATOM | 222 | OP1  | DT | 8 | 1.754  | 10.716 | 2.545  | 1.00 | 0.00 |
| ATOM | 223 | OP2  | DT | 8 | 3.831  | 11.294 | 3.838  | 1.00 | 0.00 |
| ATOM | 224 | O5'  | DT | 8 | 2.624  | 9.322  | 4.628  | 1.00 | 0.00 |
| ATOM | 225 | C5'  | DT | 8 | 1.619  | 9.664  | 5.573  | 1.00 | 0.00 |
| ATOM | 226 | H5'  | DT | 8 | 1.756  | 10.699 | 5.886  | 1.00 | 0.00 |
| ATOM | 227 | H5'' | DT | 8 | 1.719  | 9.032  | 6.455  | 1.00 | 0.00 |
| ATOM | 228 | C4'  | DT | 8 | 0.209  | 9.486  | 5.041  | 1.00 | 0.00 |
| ATOM | 229 | H4'  | DT | 8 | -0.033 | 10.164 | 4.223  | 1.00 | 0.00 |
| ATOM | 230 | O4'  | DT | 8 | 0.090  | 8.147  | 4.456  | 1.00 | 0.00 |
| ATOM | 231 | C1'  | DT | 8 | -1.003 | 7.519  | 5.100  | 1.00 | 0.00 |
| ATOM | 232 | H1'  | DT | 8 | -1.919 | 7.758  | 4.559  | 1.00 | 0.00 |
| ATOM | 233 | N1   | DT | 8 | -0.993 | 6.058  | 5.100  | 1.00 | 0.00 |
| ATOM | 234 | C6   | DT | 8 | -2.243 | 5.548  | 5.100  | 1.00 | 0.00 |
| ATOM | 235 | H6   | DT | 8 | -3.097 | 6.208  | 5.056  | 1.00 | 0.00 |
| ATOM | 236 | C5   | DT | 8 | -2.456 | 4.197  | 5.100  | 1.00 | 0.00 |
| ATOM | 237 | C7   | DT | 8 | -3.894 | 3.736  | 5.100  | 1.00 | 0.00 |

|      |     |      |    |    |        |        |        |      |      |
|------|-----|------|----|----|--------|--------|--------|------|------|
| ATOM | 238 | H71  | DT | 8  | -4.397 | 4.114  | 4.210  | 1.00 | 0.00 |
| ATOM | 239 | H72  | DT | 8  | -3.927 | 2.646  | 5.100  | 1.00 | 0.00 |
| ATOM | 240 | H73  | DT | 8  | -4.397 | 4.114  | 5.990  | 1.00 | 0.00 |
| ATOM | 241 | C4   | DT | 8  | -1.365 | 3.339  | 5.100  | 1.00 | 0.00 |
| ATOM | 242 | O4   | DT | 8  | -1.448 | 2.117  | 5.100  | 1.00 | 0.00 |
| ATOM | 243 | N3   | DT | 8  | -0.151 | 3.922  | 5.100  | 1.00 | 0.00 |
| ATOM | 244 | H3   | DT | 8  | 0.724  | 3.272  | 5.100  | 1.00 | 0.00 |
| ATOM | 245 | C2   | DT | 8  | 0.078  | 5.239  | 5.100  | 1.00 | 0.00 |
| ATOM | 246 | O2   | DT | 8  | 1.222  | 5.683  | 5.100  | 1.00 | 0.00 |
| ATOM | 247 | C3'  | DT | 8  | -0.837 | 9.516  | 6.170  | 1.00 | 0.00 |
| ATOM | 248 | H3'  | DT | 8  | -0.611 | 10.104 | 7.060  | 1.00 | 0.00 |
| ATOM | 249 | C2'  | DT | 8  | -0.827 | 8.045  | 6.522  | 1.00 | 0.00 |
| ATOM | 250 | H2'  | DT | 8  | -0.174 | 7.880  | 7.379  | 1.00 | 0.00 |
| ATOM | 251 | H2'' | DT | 8  | -1.839 | 7.723  | 6.770  | 1.00 | 0.00 |
| ATOM | 252 | O3'  | DT | 8  | -2.143 | 9.834  | 5.674  | 1.00 | 0.00 |
| ATOM | 253 | P    | DC | 9  | -3.384 | 10.111 | 6.664  | 1.00 | 0.00 |
| ATOM | 254 | OP1  | DC | 9  | -4.644 | 9.816  | 5.945  | 1.00 | 0.00 |
| ATOM | 255 | OP2  | DC | 9  | -3.264 | 11.471 | 7.238  | 1.00 | 0.00 |
| ATOM | 256 | O5'  | DC | 9  | -3.137 | 9.162  | 8.028  | 1.00 | 0.00 |
| ATOM | 257 | C5'  | DC | 9  | -4.158 | 8.873  | 8.973  | 1.00 | 0.00 |
| ATOM | 258 | H5'  | DC | 9  | -4.634 | 9.803  | 9.286  | 1.00 | 0.00 |
| ATOM | 259 | H5'' | DC | 9  | -3.717 | 8.410  | 9.855  | 1.00 | 0.00 |
| ATOM | 260 | C4'  | DC | 9  | -5.217 | 7.925  | 8.441  | 1.00 | 0.00 |
| ATOM | 261 | H4'  | DC | 9  | -5.801 | 8.346  | 7.622  | 1.00 | 0.00 |
| ATOM | 262 | O4'  | DC | 9  | -4.554 | 6.755  | 7.856  | 1.00 | 0.00 |
| ATOM | 263 | C1'  | DC | 9  | -5.097 | 5.618  | 8.500  | 1.00 | 0.00 |
| ATOM | 264 | H1'  | DC | 9  | -5.969 | 5.322  | 7.917  | 1.00 | 0.00 |
| ATOM | 265 | N1   | DC | 9  | -4.259 | 4.421  | 8.500  | 1.00 | 0.00 |
| ATOM | 266 | C6   | DC | 9  | -4.895 | 3.210  | 8.500  | 1.00 | 0.00 |
| ATOM | 267 | H6   | DC | 9  | -5.974 | 3.158  | 8.500  | 1.00 | 0.00 |
| ATOM | 268 | C5   | DC | 9  | -4.171 | 2.040  | 8.500  | 1.00 | 0.00 |
| ATOM | 269 | H5   | DC | 9  | -4.675 | 1.073  | 8.500  | 1.00 | 0.00 |
| ATOM | 270 | C4   | DC | 9  | -2.800 | 2.174  | 8.500  | 1.00 | 0.00 |
| ATOM | 271 | N4   | DC | 9  | -2.016 | 1.105  | 8.500  | 1.00 | 0.00 |
| ATOM | 272 | H41  | DC | 9  | -1.017 | 1.255  | 8.500  | 1.00 | 0.00 |
| ATOM | 273 | H42  | DC | 9  | -2.418 | 0.179  | 8.500  | 1.00 | 0.00 |
| ATOM | 274 | N3   | DC | 9  | -2.192 | 3.390  | 8.500  | 1.00 | 0.00 |
| ATOM | 275 | C2   | DC | 9  | -2.919 | 4.536  | 8.500  | 1.00 | 0.00 |
| ATOM | 276 | O2   | DC | 9  | -2.381 | 5.637  | 8.500  | 1.00 | 0.00 |
| ATOM | 277 | C3'  | DC | 9  | -6.095 | 7.356  | 9.570  | 1.00 | 0.00 |
| ATOM | 278 | H3'  | DC | 9  | -6.243 | 7.968  | 10.460 | 1.00 | 0.00 |
| ATOM | 279 | C2'  | DC | 9  | -5.251 | 6.150  | 9.922  | 1.00 | 0.00 |
| ATOM | 280 | H2'  | DC | 9  | -4.620 | 6.385  | 10.779 | 1.00 | 0.00 |
| ATOM | 281 | H2'' | DC | 9  | -5.901 | 5.311  | 10.170 | 1.00 | 0.00 |
| ATOM | 282 | O3'  | DC | 9  | -7.351 | 6.875  | 9.074  | 1.00 | 0.00 |
| ATOM | 283 | P    | DG | 10 | -8.529 | 6.398  | 10.064 | 1.00 | 0.00 |
| ATOM | 284 | OP1  | DG | 10 | -9.399 | 5.439  | 9.345  | 1.00 | 0.00 |
| ATOM | 285 | OP2  | DG | 10 | -9.203 | 7.585  | 10.638 | 1.00 | 0.00 |
| ATOM | 286 | O5'  | DG | 10 | -7.787 | 5.757  | 11.428 | 1.00 | 0.00 |
| ATOM | 287 | C5'  | DG | 10 | -8.463 | 4.939  | 12.373 | 1.00 | 0.00 |
| ATOM | 288 | H5'  | DG | 10 | -9.382 | 5.434  | 12.686 | 1.00 | 0.00 |
| ATOM | 289 | H5'' | DG | 10 | -7.836 | 4.808  | 13.255 | 1.00 | 0.00 |
| ATOM | 290 | C4'  | DG | 10 | -8.796 | 3.558  | 11.841 | 1.00 | 0.00 |
| ATOM | 291 | H4'  | DG | 10 | -9.516 | 3.572  | 11.023 | 1.00 | 0.00 |
| ATOM | 292 | O4'  | DG | 10 | -7.586 | 2.972  | 11.256 | 1.00 | 0.00 |
| ATOM | 293 | C1'  | DG | 10 | -7.387 | 1.727  | 11.900 | 1.00 | 0.00 |
| ATOM | 294 | H1'  | DG | 10 | -7.937 | 0.988  | 11.318 | 1.00 | 0.00 |
| ATOM | 295 | N9   | DG | 10 | -6.017 | 1.218  | 11.900 | 1.00 | 0.00 |
| ATOM | 296 | C8   | DG | 10 | -5.634 | -0.103 | 11.900 | 1.00 | 0.00 |
| ATOM | 297 | H8   | DG | 10 | -6.351 | -0.911 | 11.902 | 1.00 | 0.00 |

|      |     |      |     |    |         |        |        |      |      |
|------|-----|------|-----|----|---------|--------|--------|------|------|
| ATOM | 298 | N7   | DG  | 10 | -4.300  | -0.233 | 11.900 | 1.00 | 0.00 |
| ATOM | 299 | C5   | DG  | 10 | -3.864  | 1.042  | 11.900 | 1.00 | 0.00 |
| ATOM | 300 | C6   | DG  | 10 | -2.555  | 1.550  | 11.900 | 1.00 | 0.00 |
| ATOM | 301 | O6   | DG  | 10 | -1.493  | 0.925  | 11.900 | 1.00 | 0.00 |
| ATOM | 302 | N1   | DG  | 10 | -2.542  | 2.924  | 11.900 | 1.00 | 0.00 |
| ATOM | 303 | H1   | DG  | 10 | -1.634  | 3.343  | 11.900 | 1.00 | 0.00 |
| ATOM | 304 | C2   | DG  | 10 | -3.617  | 3.758  | 11.900 | 1.00 | 0.00 |
| ATOM | 305 | N2   | DG  | 10 | -3.391  | 5.075  | 11.900 | 1.00 | 0.00 |
| ATOM | 306 | H21  | DG  | 10 | -2.493  | 5.538  | 11.912 | 1.00 | 0.00 |
| ATOM | 307 | H22  | DG  | 10 | -4.205  | 5.672  | 11.909 | 1.00 | 0.00 |
| ATOM | 308 | N3   | DG  | 10 | -4.861  | 3.286  | 11.900 | 1.00 | 0.00 |
| ATOM | 309 | C4   | DG  | 10 | -4.899  | 1.948  | 11.900 | 1.00 | 0.00 |
| ATOM | 310 | C3'  | DG  | 10 | -9.195  | 2.591  | 12.970 | 1.00 | 0.00 |
| ATOM | 311 | H3'  | DG  | 10 | -9.665  | 3.011  | 13.860 | 1.00 | 0.00 |
| ATOM | 312 | C2'  | DG  | 10 | -7.816  | 2.078  | 13.322 | 1.00 | 0.00 |
| ATOM | 313 | H2'  | DG  | 10 | -7.430  | 2.630  | 14.179 | 1.00 | 0.00 |
| ATOM | 314 | H2'' | DG  | 10 | -7.874  | 1.018  | 13.570 | 1.00 | 0.00 |
| ATOM | 315 | O3'  | DG  | 10 | -9.955  | 1.482  | 12.474 | 1.00 | 0.00 |
| ATOM | 316 | P    | DC  | 11 | -10.654 | 0.420  | 13.464 | 1.00 | 0.00 |
| ATOM | 317 | OP1  | DC  | 11 | -10.825 | -0.864 | 12.745 | 1.00 | 0.00 |
| ATOM | 318 | OP2  | DC  | 11 | -11.883 | 1.014  | 14.038 | 1.00 | 0.00 |
| ATOM | 319 | O5'  | DC  | 11 | -9.679  | 0.314  | 14.828 | 1.00 | 0.00 |
| ATOM | 320 | C5'  | DC  | 11 | -9.771  | -0.743 | 15.773 | 1.00 | 0.00 |
| ATOM | 321 | H5'  | DC  | 11 | -10.809 | -0.858 | 16.085 | 1.00 | 0.00 |
| ATOM | 322 | H5'' | DC  | 11 | -9.182  | -0.494 | 16.656 | 1.00 | 0.00 |
| ATOM | 323 | C4'  | DC  | 11 | -9.260  | -2.069 | 15.241 | 1.00 | 0.00 |
| ATOM | 324 | H4'  | DC  | 11 | -9.860  | -2.466 | 14.422 | 1.00 | 0.00 |
| ATOM | 325 | O4'  | DC  | 11 | -7.931  | -1.864 | 14.656 | 1.00 | 0.00 |
| ATOM | 326 | C1'  | DC  | 11 | -7.060  | -2.775 | 15.300 | 1.00 | 0.00 |
| ATOM | 327 | H1'  | DC  | 11 | -7.092  | -3.695 | 14.717 | 1.00 | 0.00 |
| ATOM | 328 | N1   | DC  | 11 | -5.644  | -2.416 | 15.300 | 1.00 | 0.00 |
| ATOM | 329 | C6   | DC  | 11 | -4.737  | -3.439 | 15.300 | 1.00 | 0.00 |
| ATOM | 330 | H6   | DC  | 11 | -5.071  | -4.466 | 15.300 | 1.00 | 0.00 |
| ATOM | 331 | C5   | DC  | 11 | -3.386  | -3.177 | 15.300 | 1.00 | 0.00 |
| ATOM | 332 | H5   | DC  | 11 | -2.661  | -3.991 | 15.300 | 1.00 | 0.00 |
| ATOM | 333 | C4   | DC  | 11 | -3.025  | -1.848 | 15.300 | 1.00 | 0.00 |
| ATOM | 334 | N4   | DC  | 11 | -1.748  | -1.494 | 15.300 | 1.00 | 0.00 |
| ATOM | 335 | H41  | DC  | 11 | -1.534  | -0.507 | 15.300 | 1.00 | 0.00 |
| ATOM | 336 | H42  | DC  | 11 | -1.024  | -2.199 | 15.300 | 1.00 | 0.00 |
| ATOM | 337 | N3   | DC  | 11 | -3.947  | -0.849 | 15.300 | 1.00 | 0.00 |
| ATOM | 338 | C2   | DC  | 11 | -5.276  | -1.122 | 15.300 | 1.00 | 0.00 |
| ATOM | 339 | O2   | DC  | 11 | -6.115  | -0.228 | 15.300 | 1.00 | 0.00 |
| ATOM | 340 | C3'  | DC  | 11 | -9.039  | -3.092 | 16.370 | 1.00 | 0.00 |
| ATOM | 341 | H3'  | DC  | 11 | -9.664  | -3.013 | 17.260 | 1.00 | 0.00 |
| ATOM | 342 | C2'  | DC  | 11 | -7.612  | -2.730 | 16.722 | 1.00 | 0.00 |
| ATOM | 343 | H2'  | DC  | 11 | -7.608  | -2.056 | 17.579 | 1.00 | 0.00 |
| ATOM | 344 | H2'' | DC  | 11 | -7.058  | -3.635 | 16.970 | 1.00 | 0.00 |
| ATOM | 345 | O3'  | DC  | 11 | -9.034  | -4.437 | 15.874 | 1.00 | 0.00 |
| ATOM | 346 | P    | DG3 | 12 | -9.006  | -5.707 | 16.864 | 1.00 | 0.00 |
| ATOM | 347 | OP1  | DG3 | 12 | -8.417  | -6.861 | 16.145 | 1.00 | 0.00 |
| ATOM | 348 | OP2  | DG3 | 12 | -10.355 | -5.917 | 17.438 | 1.00 | 0.00 |
| ATOM | 349 | O5'  | DG3 | 12 | -8.144  | -5.240 | 18.228 | 1.00 | 0.00 |
| ATOM | 350 | C5'  | DG3 | 12 | -7.618  | -6.163 | 19.173 | 1.00 | 0.00 |
| ATOM | 351 | H5'  | DG3 | 12 | -8.407  | -6.848 | 19.485 | 1.00 | 0.00 |
| ATOM | 352 | H5'' | DG3 | 12 | -7.274  | -5.624 | 20.056 | 1.00 | 0.00 |
| ATOM | 353 | C4'  | DG3 | 12 | -6.445  | -6.963 | 18.641 | 1.00 | 0.00 |
| ATOM | 354 | H4'  | DG3 | 12 | -6.714  | -7.631 | 17.822 | 1.00 | 0.00 |
| ATOM | 355 | O4'  | DG3 | 12 | -5.468  | -6.040 | 18.056 | 1.00 | 0.00 |
| ATOM | 356 | C1'  | DG3 | 12 | -4.233  | -6.295 | 18.700 | 1.00 | 0.00 |
| ATOM | 357 | H1'  | DG3 | 12 | -3.736  | -7.071 | 18.118 | 1.00 | 0.00 |

|      |     |      |     |    |         |        |        |      |      |
|------|-----|------|-----|----|---------|--------|--------|------|------|
| ATOM | 358 | N9   | DG3 | 12 | -3.272  | -5.194 | 18.700 | 1.00 | 0.00 |
| ATOM | 359 | C8   | DG3 | 12 | -1.901  | -5.305 | 18.700 | 1.00 | 0.00 |
| ATOM | 360 | H8   | DG3 | 12 | -1.400  | -6.262 | 18.702 | 1.00 | 0.00 |
| ATOM | 361 | N7   | DG3 | 12 | -1.306  | -4.103 | 18.700 | 1.00 | 0.00 |
| ATOM | 362 | C5   | DG3 | 12 | -2.344  | -3.243 | 18.700 | 1.00 | 0.00 |
| ATOM | 363 | C6   | DG3 | 12 | -2.356  | -1.840 | 18.700 | 1.00 | 0.00 |
| ATOM | 364 | O6   | DG3 | 12 | -1.394  | -1.068 | 18.700 | 1.00 | 0.00 |
| ATOM | 365 | N1   | DG3 | 12 | -3.635  | -1.340 | 18.700 | 1.00 | 0.00 |
| ATOM | 366 | H1   | DG3 | 12 | -3.706  | -0.342 | 18.700 | 1.00 | 0.00 |
| ATOM | 367 | C2   | DG3 | 12 | -4.796  | -2.050 | 18.700 | 1.00 | 0.00 |
| ATOM | 368 | N2   | DG3 | 12 | -5.948  | -1.372 | 18.700 | 1.00 | 0.00 |
| ATOM | 369 | H21  | DG3 | 12 | -6.063  | -0.369 | 18.712 | 1.00 | 0.00 |
| ATOM | 370 | H22  | DG3 | 12 | -6.795  | -1.922 | 18.709 | 1.00 | 0.00 |
| ATOM | 371 | N3   | DG3 | 12 | -4.795  | -3.380 | 18.700 | 1.00 | 0.00 |
| ATOM | 372 | C4   | DG3 | 12 | -3.558  | -3.891 | 18.700 | 1.00 | 0.00 |
| ATOM | 373 | C3'  | DG3 | 12 | -5.682  | -7.680 | 19.770 | 1.00 | 0.00 |
| ATOM | 374 | H3'  | DG3 | 12 | -6.241  | -7.970 | 20.660 | 1.00 | 0.00 |
| ATOM | 375 | C2'  | DG3 | 12 | -4.713  | -6.572 | 20.122 | 1.00 | 0.00 |
| ATOM | 376 | H2'  | DG3 | 12 | -5.092  | -6.016 | 20.979 | 1.00 | 0.00 |
| ATOM | 377 | H2'' | DG3 | 12 | -3.743  | -7.002 | 20.369 | 1.00 | 0.00 |
| ATOM | 378 | O3'  | DG3 | 12 | -4.914  | -8.784 | 19.274 | 1.00 | 0.00 |
| ATOM | 379 | HO3' | DG3 | 12 | -4.419  | -9.265 | 19.941 | 1.00 | 0.00 |
| TER  |     |      |     |    |         |        |        |      |      |
| ATOM | 380 | HO5' | DC5 | 13 | -9.975  | 1.225  | 18.921 | 1.00 | 0.00 |
| ATOM | 381 | O5'  | DC5 | 13 | -9.474  | 2.004  | 19.172 | 1.00 | 0.00 |
| ATOM | 382 | C5'  | DC5 | 13 | -9.311  | 3.053  | 18.227 | 1.00 | 0.00 |
| ATOM | 383 | H5'  | DC5 | 13 | -10.291 | 3.413  | 17.914 | 1.00 | 0.00 |
| ATOM | 384 | H5'' | DC5 | 13 | -8.795  | 2.617  | 17.372 | 1.00 | 0.00 |
| ATOM | 385 | C4'  | DC5 | 13 | -8.499  | 4.218  | 18.759 | 1.00 | 0.00 |
| ATOM | 386 | H4'  | DC5 | 13 | -8.987  | 4.746  | 19.578 | 1.00 | 0.00 |
| ATOM | 387 | O4'  | DC5 | 13 | -7.257  | 3.702  | 19.344 | 1.00 | 0.00 |
| ATOM | 388 | C1'  | DC5 | 13 | -6.194  | 4.379  | 18.700 | 1.00 | 0.00 |
| ATOM | 389 | H1'  | DC5 | 13 | -6.006  | 5.280  | 19.284 | 1.00 | 0.00 |
| ATOM | 390 | N1   | DC5 | 13 | -4.905  | 3.692  | 18.700 | 1.00 | 0.00 |
| ATOM | 391 | C6   | DC5 | 13 | -3.780  | 4.470  | 18.700 | 1.00 | 0.00 |
| ATOM | 392 | H6   | DC5 | 13 | -3.860  | 5.547  | 18.700 | 1.00 | 0.00 |
| ATOM | 393 | C5   | DC5 | 13 | -2.530  | 3.893  | 18.700 | 1.00 | 0.00 |
| ATOM | 394 | H5   | DC5 | 13 | -1.631  | 4.510  | 18.700 | 1.00 | 0.00 |
| ATOM | 395 | C4   | DC5 | 13 | -2.497  | 2.516  | 18.700 | 1.00 | 0.00 |
| ATOM | 396 | N4   | DC5 | 13 | -1.341  | 1.867  | 18.700 | 1.00 | 0.00 |
| ATOM | 397 | H41  | DC5 | 13 | -1.369  | 0.857  | 18.700 | 1.00 | 0.00 |
| ATOM | 398 | H42  | DC5 | 13 | -0.470  | 2.378  | 18.700 | 1.00 | 0.00 |
| ATOM | 399 | N3   | DC5 | 13 | -3.630  | 1.765  | 18.700 | 1.00 | 0.00 |
| ATOM | 400 | C2   | DC5 | 13 | -4.856  | 2.348  | 18.700 | 1.00 | 0.00 |
| ATOM | 401 | O2   | DC5 | 13 | -5.884  | 1.680  | 18.700 | 1.00 | 0.00 |
| ATOM | 402 | C3'  | DC5 | 13 | -8.040  | 5.159  | 17.630 | 1.00 | 0.00 |
| ATOM | 403 | H3'  | DC5 | 13 | -8.666  | 5.232  | 16.740 | 1.00 | 0.00 |
| ATOM | 404 | C2'  | DC5 | 13 | -6.741  | 4.467  | 17.278 | 1.00 | 0.00 |
| ATOM | 405 | H2'  | DC5 | 13 | -6.898  | 3.812  | 16.421 | 1.00 | 0.00 |
| ATOM | 406 | H2'' | DC5 | 13 | -5.986  | 5.214  | 17.030 | 1.00 | 0.00 |
| ATOM | 407 | O3'  | DC5 | 13 | -7.715  | 6.464  | 18.126 | 1.00 | 0.00 |
| ATOM | 408 | P    | DG  | 14 | -7.385  | 7.691  | 17.136 | 1.00 | 0.00 |
| ATOM | 409 | OP1  | DG  | 14 | -6.538  | 8.670  | 17.855 | 1.00 | 0.00 |
| ATOM | 410 | OP2  | DG  | 14 | -8.645  | 8.216  | 16.562 | 1.00 | 0.00 |
| ATOM | 411 | O5'  | DG  | 14 | -6.659  | 7.032  | 15.772 | 1.00 | 0.00 |
| ATOM | 412 | C5'  | DG  | 14 | -5.928  | 7.802  | 14.827 | 1.00 | 0.00 |
| ATOM | 413 | H5'  | DG  | 14 | -6.530  | 8.655  | 14.513 | 1.00 | 0.00 |
| ATOM | 414 | H5'' | DG  | 14 | -5.722  | 7.196  | 13.945 | 1.00 | 0.00 |
| ATOM | 415 | C4'  | DG  | 14 | -4.598  | 8.300  | 15.359 | 1.00 | 0.00 |
| ATOM | 416 | H4'  | DG  | 14 | -4.700  | 9.013  | 16.178 | 1.00 | 0.00 |

|      |     |      |    |    |        |        |        |      |      |
|------|-----|------|----|----|--------|--------|--------|------|------|
| ATOM | 417 | O4'  | DG | 14 | -3.869 | 7.170  | 15.944 | 1.00 | 0.00 |
| ATOM | 418 | C1'  | DG | 14 | -2.610 | 7.123  | 15.300 | 1.00 | 0.00 |
| ATOM | 419 | H1'  | DG | 14 | -1.943 | 7.759  | 15.882 | 1.00 | 0.00 |
| ATOM | 420 | N9   | DG | 14 | -1.938 | 5.825  | 15.300 | 1.00 | 0.00 |
| ATOM | 421 | C8   | DG | 14 | -0.580 | 5.605  | 15.300 | 1.00 | 0.00 |
| ATOM | 422 | H8   | DG | 14 | 0.136  | 6.414  | 15.298 | 1.00 | 0.00 |
| ATOM | 423 | N7   | DG | 14 | -0.290 | 4.296  | 15.300 | 1.00 | 0.00 |
| ATOM | 424 | C5   | DG | 14 | -1.503 | 3.709  | 15.300 | 1.00 | 0.00 |
| ATOM | 425 | C6   | DG | 14 | -1.849 | 2.349  | 15.300 | 1.00 | 0.00 |
| ATOM | 426 | O6   | DG | 14 | -1.099 | 1.370  | 15.300 | 1.00 | 0.00 |
| ATOM | 427 | N1   | DG | 14 | -3.210 | 2.169  | 15.300 | 1.00 | 0.00 |
| ATOM | 428 | H1   | DG | 14 | -3.516 | 1.217  | 15.300 | 1.00 | 0.00 |
| ATOM | 429 | C2   | DG | 14 | -4.169 | 3.135  | 15.300 | 1.00 | 0.00 |
| ATOM | 430 | N2   | DG | 14 | -5.449 | 2.751  | 15.300 | 1.00 | 0.00 |
| ATOM | 431 | H21  | DG | 14 | -5.799 | 1.804  | 15.288 | 1.00 | 0.00 |
| ATOM | 432 | H22  | DG | 14 | -6.141 | 3.487  | 15.291 | 1.00 | 0.00 |
| ATOM | 433 | N3   | DG | 14 | -3.850 | 4.427  | 15.300 | 1.00 | 0.00 |
| ATOM | 434 | C4   | DG | 14 | -2.527 | 4.627  | 15.300 | 1.00 | 0.00 |
| ATOM | 435 | C3'  | DG | 14 | -3.686 | 8.813  | 14.230 | 1.00 | 0.00 |
| ATOM | 436 | H3'  | DG | 14 | -4.159 | 9.228  | 13.340 | 1.00 | 0.00 |
| ATOM | 437 | C2'  | DG | 14 | -3.010 | 7.506  | 13.878 | 1.00 | 0.00 |
| ATOM | 438 | H2'  | DG | 14 | -3.511 | 7.056  | 13.021 | 1.00 | 0.00 |
| ATOM | 439 | H2'' | DG | 14 | -1.965 | 7.692  | 13.630 | 1.00 | 0.00 |
| ATOM | 440 | O3'  | DG | 14 | -2.677 | 9.702  | 14.726 | 1.00 | 0.00 |
| ATOM | 441 | P    | DC | 15 | -1.708 | 10.524 | 13.736 | 1.00 | 0.00 |
| ATOM | 442 | OP1  | DC | 15 | -0.454 | 10.849 | 14.455 | 1.00 | 0.00 |
| ATOM | 443 | OP2  | DC | 15 | -2.446 | 11.672 | 13.162 | 1.00 | 0.00 |
| ATOM | 444 | O5'  | DC | 15 | -1.485 | 9.570  | 12.372 | 1.00 | 0.00 |
| ATOM | 445 | C5'  | DC | 15 | -0.446 | 9.789  | 11.427 | 1.00 | 0.00 |
| ATOM | 446 | H5'  | DC | 15 | -0.457 | 10.833 | 11.115 | 1.00 | 0.00 |
| ATOM | 447 | H5'' | DC | 15 | -0.621 | 9.174  | 10.544 | 1.00 | 0.00 |
| ATOM | 448 | C4'  | DC | 15 | 0.932  | 9.442  | 11.959 | 1.00 | 0.00 |
| ATOM | 449 | H4'  | DC | 15 | 1.253  | 10.086 | 12.778 | 1.00 | 0.00 |
| ATOM | 450 | O4'  | DC | 15 | 0.889  | 8.098  | 12.544 | 1.00 | 0.00 |
| ATOM | 451 | C1'  | DC | 15 | 1.899  | 7.344  | 11.900 | 1.00 | 0.00 |
| ATOM | 452 | H1'  | DC | 15 | 2.808  | 7.488  | 12.484 | 1.00 | 0.00 |
| ATOM | 453 | N1   | DC | 15 | 1.714  | 5.895  | 11.900 | 1.00 | 0.00 |
| ATOM | 454 | C6   | DC | 15 | 2.840  | 5.119  | 11.900 | 1.00 | 0.00 |
| ATOM | 455 | H6   | DC | 15 | 3.819  | 5.575  | 11.900 | 1.00 | 0.00 |
| ATOM | 456 | C5   | DC | 15 | 2.743  | 3.746  | 11.900 | 1.00 | 0.00 |
| ATOM | 457 | H5   | DC | 15 | 3.638  | 3.124  | 11.900 | 1.00 | 0.00 |
| ATOM | 458 | C4   | DC | 15 | 1.467  | 3.227  | 11.900 | 1.00 | 0.00 |
| ATOM | 459 | N4   | DC | 15 | 1.271  | 1.916  | 11.900 | 1.00 | 0.00 |
| ATOM | 460 | H41  | DC | 15 | 0.317  | 1.584  | 11.900 | 1.00 | 0.00 |
| ATOM | 461 | H42  | DC | 15 | 2.058  | 1.284  | 11.900 | 1.00 | 0.00 |
| ATOM | 462 | N3   | DC | 15 | 0.364  | 4.021  | 11.900 | 1.00 | 0.00 |
| ATOM | 463 | C2   | DC | 15 | 0.475  | 5.373  | 11.900 | 1.00 | 0.00 |
| ATOM | 464 | O2   | DC | 15 | -0.514 | 6.097  | 11.900 | 1.00 | 0.00 |
| ATOM | 465 | C3'  | DC | 15 | 1.974  | 9.347  | 10.830 | 1.00 | 0.00 |
| ATOM | 466 | H3'  | DC | 15 | 1.820  | 9.958  | 9.940  | 1.00 | 0.00 |
| ATOM | 467 | C2'  | DC | 15 | 1.788  | 7.887  | 10.478 | 1.00 | 0.00 |
| ATOM | 468 | H2'  | DC | 15 | 1.120  | 7.802  | 9.621  | 1.00 | 0.00 |
| ATOM | 469 | H2'' | DC | 15 | 2.754  | 7.447  | 10.230 | 1.00 | 0.00 |
| ATOM | 470 | O3'  | DC | 15 | 3.309  | 9.505  | 11.326 | 1.00 | 0.00 |
| ATOM | 471 | P    | DG | 16 | 4.574  | 9.631  | 10.336 | 1.00 | 0.00 |
| ATOM | 472 | OP1  | DG | 16 | 5.790  | 9.187  | 11.055 | 1.00 | 0.00 |
| ATOM | 473 | OP2  | DG | 16 | 4.618  | 10.996 | 9.762  | 1.00 | 0.00 |
| ATOM | 474 | O5'  | DG | 16 | 4.215  | 8.719  | 8.972  | 1.00 | 0.00 |
| ATOM | 475 | C5'  | DG | 16 | 5.194  | 8.309  | 8.027  | 1.00 | 0.00 |
| ATOM | 476 | H5'  | DG | 16 | 5.778  | 9.175  | 7.714  | 1.00 | 0.00 |

|      |     |      |    |    |        |        |       |      |      |
|------|-----|------|----|----|--------|--------|-------|------|------|
| ATOM | 477 | H5'  | DG | 16 | 4.700  | 7.902  | 7.145 | 1.00 | 0.00 |
| ATOM | 478 | C4'  | DG | 16 | 6.131  | 7.241  | 8.559 | 1.00 | 0.00 |
| ATOM | 479 | H4'  | DG | 16 | 6.761  | 7.589  | 9.378 | 1.00 | 0.00 |
| ATOM | 480 | O4'  | DG | 16 | 5.333  | 6.159  | 9.144 | 1.00 | 0.00 |
| ATOM | 481 | C1'  | DG | 16 | 5.735  | 4.965  | 8.500 | 1.00 | 0.00 |
| ATOM | 482 | H1'  | DG | 16 | 6.566  | 4.566  | 9.082 | 1.00 | 0.00 |
| ATOM | 483 | N9   | DG | 16 | 4.760  | 3.877  | 8.500 | 1.00 | 0.00 |
| ATOM | 484 | C8   | DG | 16 | 5.035  | 2.529  | 8.500 | 1.00 | 0.00 |
| ATOM | 485 | H8   | DG | 16 | 6.045  | 2.147  | 8.498 | 1.00 | 0.00 |
| ATOM | 486 | N7   | DG | 16 | 3.915  | 1.794  | 8.500 | 1.00 | 0.00 |
| ATOM | 487 | C5   | DG | 16 | 2.935  | 2.720  | 8.500 | 1.00 | 0.00 |
| ATOM | 488 | C6   | DG | 16 | 1.541  | 2.561  | 8.500 | 1.00 | 0.00 |
| ATOM | 489 | O6   | DG | 16 | 0.891  | 1.513  | 8.500 | 1.00 | 0.00 |
| ATOM | 490 | N1   | DG | 16 | 0.890  | 3.770  | 8.500 | 1.00 | 0.00 |
| ATOM | 491 | H1   | DG | 16 | -0.109 | 3.718  | 8.500 | 1.00 | 0.00 |
| ATOM | 492 | C2   | DG | 16 | 1.453  | 5.009  | 8.500 | 1.00 | 0.00 |
| ATOM | 493 | N2   | DG | 16 | 0.641  | 6.070  | 8.500 | 1.00 | 0.00 |
| ATOM | 494 | H21  | DG | 16 | -0.369 | 6.063  | 8.488 | 1.00 | 0.00 |
| ATOM | 495 | H22  | DG | 16 | 1.084  | 6.977  | 8.491 | 1.00 | 0.00 |
| ATOM | 496 | N3   | DG | 16 | 2.774  | 5.170  | 8.500 | 1.00 | 0.00 |
| ATOM | 497 | C4   | DG | 16 | 3.431  | 4.003  | 8.500 | 1.00 | 0.00 |
| ATOM | 498 | C3'  | DG | 16 | 6.935  | 6.570  | 7.430 | 1.00 | 0.00 |
| ATOM | 499 | H3'  | DG | 16 | 7.156  | 7.160  | 6.540 | 1.00 | 0.00 |
| ATOM | 500 | C2'  | DG | 16 | 5.952  | 5.475  | 7.078 | 1.00 | 0.00 |
| ATOM | 501 | H2'  | DG | 16 | 5.354  | 5.785  | 6.221 | 1.00 | 0.00 |
| ATOM | 502 | H2'' | DG | 16 | 6.496  | 4.563  | 6.831 | 1.00 | 0.00 |
| ATOM | 503 | O3'  | DG | 16 | 8.124  | 5.942  | 7.926 | 1.00 | 0.00 |
| ATOM | 504 | P    | DA | 17 | 9.236  | 5.327  | 6.936 | 1.00 | 0.00 |
| ATOM | 505 | OP1  | DA | 17 | 9.984  | 4.270  | 7.655 | 1.00 | 0.00 |
| ATOM | 506 | OP2  | DA | 17 | 10.047 | 6.425  | 6.362 | 1.00 | 0.00 |
| ATOM | 507 | O5'  | DA | 17 | 8.422  | 4.780  | 5.572 | 1.00 | 0.00 |
| ATOM | 508 | C5'  | DA | 17 | 8.995  | 3.887  | 4.627 | 1.00 | 0.00 |
| ATOM | 509 | H5'  | DA | 17 | 9.968  | 4.268  | 4.315 | 1.00 | 0.00 |
| ATOM | 510 | H5'' | DA | 17 | 8.358  | 3.833  | 3.744 | 1.00 | 0.00 |
| ATOM | 511 | C4'  | DA | 17 | 9.159  | 2.476  | 5.159 | 1.00 | 0.00 |
| ATOM | 512 | H4'  | DA | 17 | 9.875  | 2.405  | 5.978 | 1.00 | 0.00 |
| ATOM | 513 | O4'  | DA | 17 | 7.888  | 2.039  | 5.744 | 1.00 | 0.00 |
| ATOM | 514 | C1'  | DA | 17 | 7.541  | 0.827  | 5.100 | 1.00 | 0.00 |
| ATOM | 515 | H1'  | DA | 17 | 7.994  | -0.014 | 5.625 | 1.00 | 0.00 |
| ATOM | 516 | N9   | DA | 17 | 6.120  | 0.487  | 5.100 | 1.00 | 0.00 |
| ATOM | 517 | C8   | DA | 17 | 5.482  | -0.722 | 5.100 | 1.00 | 0.00 |
| ATOM | 518 | H8   | DA | 17 | 6.026  | -1.654 | 5.149 | 1.00 | 0.00 |
| ATOM | 519 | N7   | DA | 17 | 4.145  | -0.587 | 5.100 | 1.00 | 0.00 |
| ATOM | 520 | C5   | DA | 17 | 3.943  | 0.740  | 5.100 | 1.00 | 0.00 |
| ATOM | 521 | C6   | DA | 17 | 2.772  | 1.510  | 5.100 | 1.00 | 0.00 |
| ATOM | 522 | N6   | DA | 17 | 1.546  | 0.980  | 5.100 | 1.00 | 0.00 |
| ATOM | 523 | H61  | DA | 17 | 0.735  | 1.582  | 5.100 | 1.00 | 0.00 |
| ATOM | 524 | H62  | DA | 17 | 1.430  | -0.023 | 5.100 | 1.00 | 0.00 |
| ATOM | 525 | N1   | DA | 17 | 2.931  | 2.834  | 5.100 | 1.00 | 0.00 |
| ATOM | 526 | C2   | DA | 17 | 4.139  | 3.395  | 5.100 | 1.00 | 0.00 |
| ATOM | 527 | H2   | DA | 17 | 4.271  | 4.467  | 5.100 | 1.00 | 0.00 |
| ATOM | 528 | N3   | DA | 17 | 5.318  | 2.772  | 5.100 | 1.00 | 0.00 |
| ATOM | 529 | C4   | DA | 17 | 5.134  | 1.434  | 5.100 | 1.00 | 0.00 |
| ATOM | 530 | C3'  | DA | 17 | 9.440  | 1.467  | 4.030 | 1.00 | 0.00 |
| ATOM | 531 | H3'  | DA | 17 | 9.957  | 1.827  | 3.140 | 1.00 | 0.00 |
| ATOM | 532 | C2'  | DA | 17 | 8.009  | 1.124  | 3.678 | 1.00 | 0.00 |
| ATOM | 533 | H2'  | DA | 17 | 7.693  | 1.719  | 2.821 | 1.00 | 0.00 |
| ATOM | 534 | H2'' | DA | 17 | 7.939  | 0.065  | 3.430 | 1.00 | 0.00 |
| ATOM | 535 | O3'  | DA | 17 | 10.061 | 0.275  | 4.526 | 1.00 | 0.00 |
| ATOM | 536 | P    | DA | 18 | 10.627 | -0.863 | 3.536 | 1.00 | 0.00 |



|      |     |      |    |    |        |        |        |      |      |
|------|-----|------|----|----|--------|--------|--------|------|------|
| ATOM | 537 | OP1  | DA | 18 | 10.642 | -2.158 | 4.255  | 1.00 | 0.00 |
| ATOM | 538 | OP2  | DA | 18 | 11.919 | -0.421 | 2.962  | 1.00 | 0.00 |
| ATOM | 539 | O5'  | DA | 18 | 9.647  | -0.851 | 2.172  | 1.00 | 0.00 |
| ATOM | 540 | C5'  | DA | 18 | 9.611  | -1.912 | 1.227  | 1.00 | 0.00 |
| ATOM | 541 | H5'  | DA | 18 | 10.628 | -2.152 | 0.915  | 1.00 | 0.00 |
| ATOM | 542 | H5'' | DA | 18 | 9.056  | -1.594 | 0.344  | 1.00 | 0.00 |
| ATOM | 543 | C4'  | DA | 18 | 8.944  | -3.166 | 1.759  | 1.00 | 0.00 |
| ATOM | 544 | H4'  | DA | 18 | 9.493  | -3.632 | 2.578  | 1.00 | 0.00 |
| ATOM | 545 | O4'  | DA | 18 | 7.649  | -2.803 | 2.344  | 1.00 | 0.00 |
| ATOM | 546 | C1'  | DA | 18 | 6.676  | -3.603 | 1.700  | 1.00 | 0.00 |
| ATOM | 547 | H1'  | DA | 18 | 6.572  | -4.553 | 2.225  | 1.00 | 0.00 |
| ATOM | 548 | N9   | DA | 18 | 5.313  | -3.076 | 1.700  | 1.00 | 0.00 |
| ATOM | 549 | C8   | DA | 18 | 4.101  | -3.708 | 1.700  | 1.00 | 0.00 |
| ATOM | 550 | H8   | DA | 18 | 4.020  | -4.784 | 1.749  | 1.00 | 0.00 |
| ATOM | 551 | N7   | DA | 18 | 3.077  | -2.838 | 1.700  | 1.00 | 0.00 |
| ATOM | 552 | C5   | DA | 18 | 3.665  | -1.631 | 1.700  | 1.00 | 0.00 |
| ATOM | 553 | C6   | DA | 18 | 3.139  | -0.332 | 1.700  | 1.00 | 0.00 |
| ATOM | 554 | N6   | DA | 18 | 1.830  | -0.072 | 1.700  | 1.00 | 0.00 |
| ATOM | 555 | H61  | DA | 18 | 1.505  | 0.884  | 1.700  | 1.00 | 0.00 |
| ATOM | 556 | H62  | DA | 18 | 1.164  | -0.832 | 1.700  | 1.00 | 0.00 |
| ATOM | 557 | N1   | DA | 18 | 4.022  | 0.667  | 1.700  | 1.00 | 0.00 |
| ATOM | 558 | C2   | DA | 18 | 5.335  | 0.442  | 1.700  | 1.00 | 0.00 |
| ATOM | 559 | H2   | DA | 18 | 6.053  | 1.249  | 1.700  | 1.00 | 0.00 |
| ATOM | 560 | N3   | DA | 18 | 5.951  | -0.740 | 1.700  | 1.00 | 0.00 |
| ATOM | 561 | C4   | DA | 18 | 5.040  | -1.737 | 1.700  | 1.00 | 0.00 |
| ATOM | 562 | C3'  | DA | 18 | 8.602  | -4.156 | 0.630  | 1.00 | 0.00 |
| ATOM | 563 | H3'  | DA | 18 | 9.232  | -4.153 | -0.260 | 1.00 | 0.00 |
| ATOM | 564 | C2'  | DA | 18 | 7.229  | -3.625 | 0.278  | 1.00 | 0.00 |
| ATOM | 565 | H2'  | DA | 18 | 7.306  | -2.956 | -0.579 | 1.00 | 0.00 |
| ATOM | 566 | H2'' | DA | 18 | 6.570  | -4.457 | 0.031  | 1.00 | 0.00 |
| ATOM | 567 | O3'  | DA | 18 | 8.436  | -5.490 | 1.126  | 1.00 | 0.00 |
| ATOM | 568 | P    | DT | 19 | 8.255  | -6.748 | 0.136  | 1.00 | 0.00 |
| ATOM | 569 | OP1  | DT | 19 | 7.532  | -7.822 | 0.855  | 1.00 | 0.00 |
| ATOM | 570 | OP2  | DT | 19 | 9.569  | -7.118 | -0.438 | 1.00 | 0.00 |
| ATOM | 571 | O5'  | DT | 19 | 7.455  | -6.181 | -1.228 | 1.00 | 0.00 |
| ATOM | 572 | C5'  | DT | 19 | 6.823  | -7.033 | -2.173 | 1.00 | 0.00 |
| ATOM | 573 | H5'  | DT | 19 | 7.524  | -7.807 | -2.485 | 1.00 | 0.00 |
| ATOM | 574 | H5'' | DT | 19 | 6.547  | -6.456 | -3.055 | 1.00 | 0.00 |
| ATOM | 575 | C4'  | DT | 19 | 5.561  | -7.687 | -1.641 | 1.00 | 0.00 |
| ATOM | 576 | H4'  | DT | 19 | 5.748  | -8.382 | -0.822 | 1.00 | 0.00 |
| ATOM | 577 | O4'  | DT | 19 | 4.702  | -6.653 | -1.056 | 1.00 | 0.00 |
| ATOM | 578 | C1'  | DT | 19 | 3.447  | -6.758 | -1.700 | 1.00 | 0.00 |
| ATOM | 579 | H1'  | DT | 19 | 2.829  | -7.476 | -1.160 | 1.00 | 0.00 |
| ATOM | 580 | N1   | DT | 19 | 2.624  | -5.550 | -1.700 | 1.00 | 0.00 |
| ATOM | 581 | C6   | DT | 19 | 1.306  | -5.840 | -1.700 | 1.00 | 0.00 |
| ATOM | 582 | H6   | DT | 19 | 0.978  | -6.868 | -1.656 | 1.00 | 0.00 |
| ATOM | 583 | C5   | DT | 19 | 0.363  | -4.849 | -1.700 | 1.00 | 0.00 |
| ATOM | 584 | C7   | DT | 19 | -1.082 | -5.286 | -1.700 | 1.00 | 0.00 |
| ATOM | 585 | H71  | DT | 19 | -1.282 | -5.883 | -0.810 | 1.00 | 0.00 |
| ATOM | 586 | H72  | DT | 19 | -1.728 | -4.408 | -1.700 | 1.00 | 0.00 |
| ATOM | 587 | H73  | DT | 19 | -1.282 | -5.883 | -2.590 | 1.00 | 0.00 |
| ATOM | 588 | C4   | DT | 19 | 0.774  | -3.523 | -1.700 | 1.00 | 0.00 |
| ATOM | 589 | O4   | DT | 19 | 0.012  | -2.565 | -1.700 | 1.00 | 0.00 |
| ATOM | 590 | N3   | DT | 19 | 2.104  | -3.313 | -1.700 | 1.00 | 0.00 |
| ATOM | 591 | H3   | DT | 19 | 2.454  | -2.281 | -1.700 | 1.00 | 0.00 |
| ATOM | 592 | C2   | DT | 19 | 3.041  | -4.267 | -1.700 | 1.00 | 0.00 |
| ATOM | 593 | O2   | DT | 19 | 4.234  | -3.983 | -1.700 | 1.00 | 0.00 |
| ATOM | 594 | C3'  | DT | 19 | 4.718  | -8.307 | -2.770 | 1.00 | 0.00 |
| ATOM | 595 | H3'  | DT | 19 | 5.238  | -8.662 | -3.660 | 1.00 | 0.00 |
| ATOM | 596 | C2'  | DT | 19 | 3.890  | -7.090 | -3.122 | 1.00 | 0.00 |

|      |     |      |    |    |        |         |        |      |      |
|------|-----|------|----|----|--------|---------|--------|------|------|
| ATOM | 597 | H2'  | DT | 19 | 4.334  | -6.583  | -3.979 | 1.00 | 0.00 |
| ATOM | 598 | H2'' | DT | 19 | 2.875  | -7.400  | -3.370 | 1.00 | 0.00 |
| ATOM | 599 | O3'  | DT | 19 | 3.823  | -9.311  | -2.274 | 1.00 | 0.00 |
| ATOM | 600 | P    | DT | 20 | 2.960  | -10.243 | -3.264 | 1.00 | 0.00 |
| ATOM | 601 | OP1  | DT | 20 | 1.754  | -10.716 | -2.545 | 1.00 | 0.00 |
| ATOM | 602 | OP2  | DT | 20 | 3.831  | -11.294 | -3.838 | 1.00 | 0.00 |
| ATOM | 603 | O5'  | DT | 20 | 2.624  | -9.322  | -4.628 | 1.00 | 0.00 |
| ATOM | 604 | C5'  | DT | 20 | 1.619  | -9.664  | -5.573 | 1.00 | 0.00 |
| ATOM | 605 | H5'  | DT | 20 | 1.756  | -10.699 | -5.886 | 1.00 | 0.00 |
| ATOM | 606 | H5'' | DT | 20 | 1.719  | -9.032  | -6.455 | 1.00 | 0.00 |
| ATOM | 607 | C4'  | DT | 20 | 0.209  | -9.486  | -5.041 | 1.00 | 0.00 |
| ATOM | 608 | H4'  | DT | 20 | -0.033 | -10.164 | -4.223 | 1.00 | 0.00 |
| ATOM | 609 | O4'  | DT | 20 | 0.090  | -8.147  | -4.456 | 1.00 | 0.00 |
| ATOM | 610 | C1'  | DT | 20 | -1.003 | -7.519  | -5.100 | 1.00 | 0.00 |
| ATOM | 611 | H1'  | DT | 20 | -1.919 | -7.758  | -4.559 | 1.00 | 0.00 |
| ATOM | 612 | N1   | DT | 20 | -0.993 | -6.058  | -5.100 | 1.00 | 0.00 |
| ATOM | 613 | C6   | DT | 20 | -2.243 | -5.548  | -5.100 | 1.00 | 0.00 |
| ATOM | 614 | H6   | DT | 20 | -3.097 | -6.208  | -5.056 | 1.00 | 0.00 |
| ATOM | 615 | C5   | DT | 20 | -2.456 | -4.197  | -5.100 | 1.00 | 0.00 |
| ATOM | 616 | C7   | DT | 20 | -3.894 | -3.736  | -5.100 | 1.00 | 0.00 |
| ATOM | 617 | H71  | DT | 20 | -4.397 | -4.114  | -4.210 | 1.00 | 0.00 |
| ATOM | 618 | H72  | DT | 20 | -3.927 | -2.646  | -5.100 | 1.00 | 0.00 |
| ATOM | 619 | H73  | DT | 20 | -4.397 | -4.114  | -5.990 | 1.00 | 0.00 |
| ATOM | 620 | C4   | DT | 20 | -1.365 | -3.339  | -5.100 | 1.00 | 0.00 |
| ATOM | 621 | O4   | DT | 20 | -1.448 | -2.117  | -5.100 | 1.00 | 0.00 |
| ATOM | 622 | N3   | DT | 20 | -0.151 | -3.922  | -5.100 | 1.00 | 0.00 |
| ATOM | 623 | H3   | DT | 20 | 0.724  | -3.272  | -5.100 | 1.00 | 0.00 |
| ATOM | 624 | C2   | DT | 20 | 0.078  | -5.239  | -5.100 | 1.00 | 0.00 |
| ATOM | 625 | O2   | DT | 20 | 1.222  | -5.683  | -5.100 | 1.00 | 0.00 |
| ATOM | 626 | C3'  | DT | 20 | -0.837 | -9.516  | -6.170 | 1.00 | 0.00 |
| ATOM | 627 | H3'  | DT | 20 | -0.611 | -10.104 | -7.060 | 1.00 | 0.00 |
| ATOM | 628 | C2'  | DT | 20 | -0.827 | -8.045  | -6.522 | 1.00 | 0.00 |
| ATOM | 629 | H2'  | DT | 20 | -0.174 | -7.880  | -7.379 | 1.00 | 0.00 |
| ATOM | 630 | H2'' | DT | 20 | -1.839 | -7.723  | -6.770 | 1.00 | 0.00 |
| ATOM | 631 | O3'  | DT | 20 | -2.143 | -9.834  | -5.674 | 1.00 | 0.00 |
| ATOM | 632 | P    | DC | 21 | -3.384 | -10.111 | -6.664 | 1.00 | 0.00 |
| ATOM | 633 | OP1  | DC | 21 | -4.644 | -9.816  | -5.945 | 1.00 | 0.00 |
| ATOM | 634 | OP2  | DC | 21 | -3.264 | -11.471 | -7.238 | 1.00 | 0.00 |
| ATOM | 635 | O5'  | DC | 21 | -3.137 | -9.162  | -8.028 | 1.00 | 0.00 |
| ATOM | 636 | C5'  | DC | 21 | -4.158 | -8.873  | -8.973 | 1.00 | 0.00 |
| ATOM | 637 | H5'  | DC | 21 | -4.634 | -9.803  | -9.286 | 1.00 | 0.00 |
| ATOM | 638 | H5'' | DC | 21 | -3.717 | -8.410  | -9.855 | 1.00 | 0.00 |
| ATOM | 639 | C4'  | DC | 21 | -5.217 | -7.925  | -8.441 | 1.00 | 0.00 |
| ATOM | 640 | H4'  | DC | 21 | -5.801 | -8.346  | -7.622 | 1.00 | 0.00 |
| ATOM | 641 | O4'  | DC | 21 | -4.554 | -6.755  | -7.856 | 1.00 | 0.00 |
| ATOM | 642 | C1'  | DC | 21 | -5.097 | -5.618  | -8.500 | 1.00 | 0.00 |
| ATOM | 643 | H1'  | DC | 21 | -5.969 | -5.322  | -7.917 | 1.00 | 0.00 |
| ATOM | 644 | N1   | DC | 21 | -4.259 | -4.421  | -8.500 | 1.00 | 0.00 |
| ATOM | 645 | C6   | DC | 21 | -4.895 | -3.210  | -8.500 | 1.00 | 0.00 |
| ATOM | 646 | H6   | DC | 21 | -5.974 | -3.158  | -8.500 | 1.00 | 0.00 |
| ATOM | 647 | C5   | DC | 21 | -4.171 | -2.040  | -8.500 | 1.00 | 0.00 |
| ATOM | 648 | H5   | DC | 21 | -4.675 | -1.073  | -8.500 | 1.00 | 0.00 |
| ATOM | 649 | C4   | DC | 21 | -2.800 | -2.174  | -8.500 | 1.00 | 0.00 |
| ATOM | 650 | N4   | DC | 21 | -2.016 | -1.105  | -8.500 | 1.00 | 0.00 |
| ATOM | 651 | H41  | DC | 21 | -1.017 | -1.255  | -8.500 | 1.00 | 0.00 |
| ATOM | 652 | H42  | DC | 21 | -2.418 | -0.179  | -8.500 | 1.00 | 0.00 |
| ATOM | 653 | N3   | DC | 21 | -2.192 | -3.390  | -8.500 | 1.00 | 0.00 |
| ATOM | 654 | C2   | DC | 21 | -2.919 | -4.536  | -8.500 | 1.00 | 0.00 |
| ATOM | 655 | O2   | DC | 21 | -2.381 | -5.637  | -8.500 | 1.00 | 0.00 |
| ATOM | 656 | C3'  | DC | 21 | -6.095 | -7.356  | -9.570 | 1.00 | 0.00 |

|      |     |      |    |    |         |        |         |      |      |
|------|-----|------|----|----|---------|--------|---------|------|------|
| ATOM | 657 | H3'  | DC | 21 | -6.243  | -7.968 | -10.460 | 1.00 | 0.00 |
| ATOM | 658 | C2'  | DC | 21 | -5.251  | -6.150 | -9.922  | 1.00 | 0.00 |
| ATOM | 659 | H2'  | DC | 21 | -4.620  | -6.385 | -10.779 | 1.00 | 0.00 |
| ATOM | 660 | H2'' | DC | 21 | -5.901  | -5.311 | -10.170 | 1.00 | 0.00 |
| ATOM | 661 | O3'  | DC | 21 | -7.351  | -6.875 | -9.074  | 1.00 | 0.00 |
| ATOM | 662 | P    | DG | 22 | -8.529  | -6.398 | -10.064 | 1.00 | 0.00 |
| ATOM | 663 | OP1  | DG | 22 | -9.399  | -5.439 | -9.345  | 1.00 | 0.00 |
| ATOM | 664 | OP2  | DG | 22 | -9.203  | -7.585 | -10.638 | 1.00 | 0.00 |
| ATOM | 665 | O5'  | DG | 22 | -7.787  | -5.757 | -11.428 | 1.00 | 0.00 |
| ATOM | 666 | C5'  | DG | 22 | -8.463  | -4.939 | -12.373 | 1.00 | 0.00 |
| ATOM | 667 | H5'  | DG | 22 | -9.382  | -5.434 | -12.686 | 1.00 | 0.00 |
| ATOM | 668 | H5'' | DG | 22 | -7.836  | -4.808 | -13.255 | 1.00 | 0.00 |
| ATOM | 669 | C4'  | DG | 22 | -8.796  | -3.558 | -11.841 | 1.00 | 0.00 |
| ATOM | 670 | H4'  | DG | 22 | -9.516  | -3.572 | -11.023 | 1.00 | 0.00 |
| ATOM | 671 | O4'  | DG | 22 | -7.586  | -2.972 | -11.256 | 1.00 | 0.00 |
| ATOM | 672 | C1'  | DG | 22 | -7.387  | -1.727 | -11.900 | 1.00 | 0.00 |
| ATOM | 673 | H1'  | DG | 22 | -7.937  | -0.988 | -11.318 | 1.00 | 0.00 |
| ATOM | 674 | N9   | DG | 22 | -6.017  | -1.218 | -11.900 | 1.00 | 0.00 |
| ATOM | 675 | C8   | DG | 22 | -5.634  | 0.103  | -11.900 | 1.00 | 0.00 |
| ATOM | 676 | H8   | DG | 22 | -6.351  | 0.911  | -11.902 | 1.00 | 0.00 |
| ATOM | 677 | N7   | DG | 22 | -4.300  | 0.233  | -11.900 | 1.00 | 0.00 |
| ATOM | 678 | C5   | DG | 22 | -3.864  | -1.042 | -11.900 | 1.00 | 0.00 |
| ATOM | 679 | C6   | DG | 22 | -2.555  | -1.550 | -11.900 | 1.00 | 0.00 |
| ATOM | 680 | O6   | DG | 22 | -1.493  | -0.925 | -11.900 | 1.00 | 0.00 |
| ATOM | 681 | N1   | DG | 22 | -2.542  | -2.924 | -11.900 | 1.00 | 0.00 |
| ATOM | 682 | H1   | DG | 22 | -1.634  | -3.343 | -11.900 | 1.00 | 0.00 |
| ATOM | 683 | C2   | DG | 22 | -3.617  | -3.758 | -11.900 | 1.00 | 0.00 |
| ATOM | 684 | N2   | DG | 22 | -3.391  | -5.075 | -11.900 | 1.00 | 0.00 |
| ATOM | 685 | H21  | DG | 22 | -2.493  | -5.538 | -11.912 | 1.00 | 0.00 |
| ATOM | 686 | H22  | DG | 22 | -4.205  | -5.672 | -11.909 | 1.00 | 0.00 |
| ATOM | 687 | N3   | DG | 22 | -4.861  | -3.286 | -11.900 | 1.00 | 0.00 |
| ATOM | 688 | C4   | DG | 22 | -4.899  | -1.948 | -11.900 | 1.00 | 0.00 |
| ATOM | 689 | C3'  | DG | 22 | -9.195  | -2.591 | -12.970 | 1.00 | 0.00 |
| ATOM | 690 | H3'  | DG | 22 | -9.665  | -3.011 | -13.860 | 1.00 | 0.00 |
| ATOM | 691 | C2'  | DG | 22 | -7.816  | -2.078 | -13.322 | 1.00 | 0.00 |
| ATOM | 692 | H2'  | DG | 22 | -7.430  | -2.630 | -14.179 | 1.00 | 0.00 |
| ATOM | 693 | H2'' | DG | 22 | -7.874  | -1.018 | -13.570 | 1.00 | 0.00 |
| ATOM | 694 | O3'  | DG | 22 | -9.955  | -1.482 | -12.474 | 1.00 | 0.00 |
| ATOM | 695 | P    | DC | 23 | -10.654 | -0.420 | -13.464 | 1.00 | 0.00 |
| ATOM | 696 | OP1  | DC | 23 | -10.825 | 0.864  | -12.745 | 1.00 | 0.00 |
| ATOM | 697 | OP2  | DC | 23 | -11.883 | -1.014 | -14.038 | 1.00 | 0.00 |
| ATOM | 698 | O5'  | DC | 23 | -9.679  | -0.314 | -14.828 | 1.00 | 0.00 |
| ATOM | 699 | C5'  | DC | 23 | -9.771  | 0.743  | -15.773 | 1.00 | 0.00 |
| ATOM | 700 | H5'  | DC | 23 | -10.809 | 0.858  | -16.085 | 1.00 | 0.00 |
| ATOM | 701 | H5'' | DC | 23 | -9.182  | 0.494  | -16.656 | 1.00 | 0.00 |
| ATOM | 702 | C4'  | DC | 23 | -9.260  | 2.069  | -15.241 | 1.00 | 0.00 |
| ATOM | 703 | H4'  | DC | 23 | -9.860  | 2.466  | -14.422 | 1.00 | 0.00 |
| ATOM | 704 | O4'  | DC | 23 | -7.931  | 1.864  | -14.656 | 1.00 | 0.00 |
| ATOM | 705 | C1'  | DC | 23 | -7.060  | 2.775  | -15.300 | 1.00 | 0.00 |
| ATOM | 706 | H1'  | DC | 23 | -7.092  | 3.695  | -14.717 | 1.00 | 0.00 |
| ATOM | 707 | N1   | DC | 23 | -5.644  | 2.416  | -15.300 | 1.00 | 0.00 |
| ATOM | 708 | C6   | DC | 23 | -4.737  | 3.439  | -15.300 | 1.00 | 0.00 |
| ATOM | 709 | H6   | DC | 23 | -5.071  | 4.466  | -15.300 | 1.00 | 0.00 |
| ATOM | 710 | C5   | DC | 23 | -3.386  | 3.177  | -15.300 | 1.00 | 0.00 |
| ATOM | 711 | H5   | DC | 23 | -2.661  | 3.991  | -15.300 | 1.00 | 0.00 |
| ATOM | 712 | C4   | DC | 23 | -3.025  | 1.848  | -15.300 | 1.00 | 0.00 |
| ATOM | 713 | N4   | DC | 23 | -1.748  | 1.494  | -15.300 | 1.00 | 0.00 |
| ATOM | 714 | H41  | DC | 23 | -1.534  | 0.507  | -15.300 | 1.00 | 0.00 |
| ATOM | 715 | H42  | DC | 23 | -1.024  | 2.199  | -15.300 | 1.00 | 0.00 |
| ATOM | 716 | N3   | DC | 23 | -3.947  | 0.849  | -15.300 | 1.00 | 0.00 |



## IR

|      |    |      |     |   |        |        |         |      |      |
|------|----|------|-----|---|--------|--------|---------|------|------|
| ATOM | 1  | HO5' | DC5 | 1 | 2.921  | 7.620  | -20.685 | 1.00 | 0.00 |
| ATOM | 2  | O5'  | DC5 | 1 | 2.013  | 7.575  | -20.378 | 1.00 | 0.00 |
| ATOM | 3  | C5'  | DC5 | 1 | 0.948  | 7.588  | -21.346 | 1.00 | 0.00 |
| ATOM | 4  | H5'  | DC5 | 1 | 1.053  | 6.734  | -22.015 | 1.00 | 0.00 |
| ATOM | 5  | H5'' | DC5 | 1 | 0.996  | 8.510  | -21.925 | 1.00 | 0.00 |
| ATOM | 6  | C4'  | DC5 | 1 | -0.394 | 7.509  | -20.643 | 1.00 | 0.00 |
| ATOM | 7  | H4'  | DC5 | 1 | -1.178 | 7.867  | -21.311 | 1.00 | 0.00 |
| ATOM | 8  | O4'  | DC5 | 1 | -0.723 | 6.108  | -20.413 | 1.00 | 0.00 |
| ATOM | 9  | C1'  | DC5 | 1 | -0.547 | 5.785  | -19.042 | 1.00 | 0.00 |
| ATOM | 10 | H1'  | DC5 | 1 | -1.492 | 5.436  | -18.625 | 1.00 | 0.00 |
| ATOM | 11 | N1   | DC5 | 1 | 0.336  | 4.589  | -18.960 | 1.00 | 0.00 |
| ATOM | 12 | C6   | DC5 | 1 | 1.690  | 4.713  | -18.989 | 1.00 | 0.00 |
| ATOM | 13 | H6   | DC5 | 1 | 2.140  | 5.691  | -19.072 | 1.00 | 0.00 |
| ATOM | 14 | C5   | DC5 | 1 | 2.495  | 3.623  | -18.915 | 1.00 | 0.00 |
| ATOM | 15 | H5   | DC5 | 1 | 3.578  | 3.743  | -18.940 | 1.00 | 0.00 |
| ATOM | 16 | C4   | DC5 | 1 | 1.852  | 2.348  | -18.805 | 1.00 | 0.00 |
| ATOM | 17 | N4   | DC5 | 1 | 2.575  | 1.242  | -18.728 | 1.00 | 0.00 |
| ATOM | 18 | H41  | DC5 | 1 | 2.083  | 0.364  | -18.652 | 1.00 | 0.00 |
| ATOM | 19 | H42  | DC5 | 1 | 3.584  | 1.291  | -18.746 | 1.00 | 0.00 |
| ATOM | 20 | N3   | DC5 | 1 | 0.517  | 2.237  | -18.777 | 1.00 | 0.00 |
| ATOM | 21 | C2   | DC5 | 1 | -0.270 | 3.340  | -18.853 | 1.00 | 0.00 |
| ATOM | 22 | O2   | DC5 | 1 | -1.506 | 3.277  | -18.831 | 1.00 | 0.00 |
| ATOM | 23 | C3'  | DC5 | 1 | -0.455 | 8.146  | -19.255 | 1.00 | 0.00 |
| ATOM | 24 | H3'  | DC5 | 1 | 0.207  | 9.005  | -19.145 | 1.00 | 0.00 |
| ATOM | 25 | C2'  | DC5 | 1 | 0.021  | 7.016  | -18.343 | 1.00 | 0.00 |
| ATOM | 26 | H2'  | DC5 | 1 | 0.959  | 7.302  | -17.868 | 1.00 | 0.00 |
| ATOM | 27 | H2'' | DC5 | 1 | -0.730 | 6.826  | -17.576 | 1.00 | 0.00 |
| ATOM | 28 | O3'  | DC5 | 1 | -1.781 | 8.512  | -18.897 | 1.00 | 0.00 |
| ATOM | 29 | P    | DG  | 2 | -2.140 | 8.714  | -17.351 | 1.00 | 0.00 |
| ATOM | 30 | OP1  | DG  | 2 | -0.894 | 8.874  | -16.569 | 1.00 | 0.00 |
| ATOM | 31 | OP2  | DG  | 2 | -3.133 | 9.804  | -17.210 | 1.00 | 0.00 |
| ATOM | 32 | O5'  | DG  | 2 | -2.824 | 7.312  | -16.998 | 1.00 | 0.00 |
| ATOM | 33 | C5'  | DG  | 2 | -3.693 | 6.696  | -17.966 | 1.00 | 0.00 |
| ATOM | 34 | H5'  | DG  | 2 | -3.105 | 6.067  | -18.634 | 1.00 | 0.00 |
| ATOM | 35 | H5'' | DG  | 2 | -4.197 | 7.469  | -18.546 | 1.00 | 0.00 |
| ATOM | 36 | C4'  | DG  | 2 | -4.732 | 5.843  | -17.263 | 1.00 | 0.00 |
| ATOM | 37 | H4'  | DG  | 2 | -5.576 | 5.672  | -17.931 | 1.00 | 0.00 |
| ATOM | 38 | O4'  | DG  | 2 | -4.175 | 4.517  | -17.033 | 1.00 | 0.00 |
| ATOM | 39 | C1'  | DG  | 2 | -3.843 | 4.359  | -15.662 | 1.00 | 0.00 |
| ATOM | 40 | H1'  | DG  | 2 | -4.403 | 3.522  | -15.244 | 1.00 | 0.00 |
| ATOM | 41 | N9   | DG  | 2 | -2.425 | 3.910  | -15.580 | 1.00 | 0.00 |
| ATOM | 42 | C8   | DG  | 2 | -1.271 | 4.663  | -15.594 | 1.00 | 0.00 |
| ATOM | 43 | H8   | DG  | 2 | -1.328 | 5.738  | -15.675 | 1.00 | 0.00 |
| ATOM | 44 | N7   | DG  | 2 | -0.171 | 3.954  | -15.505 | 1.00 | 0.00 |
| ATOM | 45 | C5   | DG  | 2 | -0.629 | 2.640  | -15.426 | 1.00 | 0.00 |
| ATOM | 46 | C6   | DG  | 2 | 0.096  | 1.426  | -15.313 | 1.00 | 0.00 |
| ATOM | 47 | O6   | DG  | 2 | 1.311  | 1.257  | -15.257 | 1.00 | 0.00 |
| ATOM | 48 | N1   | DG  | 2 | -0.764 | 0.319  | -15.263 | 1.00 | 0.00 |
| ATOM | 49 | H1   | DG  | 2 | -0.346 | -0.586 | -15.182 | 1.00 | 0.00 |
| ATOM | 50 | C2   | DG  | 2 | -2.143 | 0.379  | -15.316 | 1.00 | 0.00 |
| ATOM | 51 | N2   | DG  | 2 | -2.783 | -0.791 | -15.253 | 1.00 | 0.00 |
| ATOM | 52 | H21  | DG  | 2 | -2.367 | -1.709 | -15.183 | 1.00 | 0.00 |
| ATOM | 53 | H22  | DG  | 2 | -3.791 | -0.757 | -15.300 | 1.00 | 0.00 |
| ATOM | 54 | N3   | DG  | 2 | -2.822 | 1.519  | -15.422 | 1.00 | 0.00 |
| ATOM | 55 | C4   | DG  | 2 | -2.003 | 2.603  | -15.471 | 1.00 | 0.00 |
| ATOM | 56 | C3'  | DG  | 2 | -5.157 | 6.323  | -15.875 | 1.00 | 0.00 |
| ATOM | 57 | H3'  | DG  | 2 | -5.127 | 7.407  | -15.764 | 1.00 | 0.00 |

|      |     |      |    |   |         |        |         |      |      |
|------|-----|------|----|---|---------|--------|---------|------|------|
| ATOM | 58  | C2'  | DG | 2 | -4.107  | 5.688  | -14.963 | 1.00 | 0.00 |
| ATOM | 59  | H2'  | DG | 2 | -3.516  | 6.471  | -14.488 | 1.00 | 0.00 |
| ATOM | 60  | H2'' | DG | 2 | -4.603  | 5.093  | -14.196 | 1.00 | 0.00 |
| ATOM | 61  | O3'  | DG | 2 | -6.444  | 5.839  | -15.517 | 1.00 | 0.00 |
| ATOM | 62  | P    | DC | 3 | -6.854  | 5.792  | -13.971 | 1.00 | 0.00 |
| ATOM | 63  | OP1  | DC | 3 | -5.939  | 6.654  | -13.189 | 1.00 | 0.00 |
| ATOM | 64  | OP2  | DC | 3 | -8.297  | 6.090  | -13.830 | 1.00 | 0.00 |
| ATOM | 65  | O5'  | DC | 3 | -6.582  | 4.255  | -13.618 | 1.00 | 0.00 |
| ATOM | 66  | C5'  | DC | 3 | -6.924  | 3.246  | -14.586 | 1.00 | 0.00 |
| ATOM | 67  | H5'  | DC | 3 | -6.079  | 3.082  | -15.255 | 1.00 | 0.00 |
| ATOM | 68  | H5'' | DC | 3 | -7.786  | 3.575  | -15.166 | 1.00 | 0.00 |
| ATOM | 69  | C4'  | DC | 3 | -7.263  | 1.946  | -13.883 | 1.00 | 0.00 |
| ATOM | 70  | H4'  | DC | 3 | -7.846  | 1.312  | -14.551 | 1.00 | 0.00 |
| ATOM | 71  | O4'  | DC | 3 | -6.033  | 1.200  | -13.653 | 1.00 | 0.00 |
| ATOM | 72  | C1'  | DC | 3 | -5.671  | 1.268  | -12.282 | 1.00 | 0.00 |
| ATOM | 73  | H1'  | DC | 3 | -5.632  | 0.262  | -11.865 | 1.00 | 0.00 |
| ATOM | 74  | N1   | DC | 3 | -4.260  | 1.738  | -12.200 | 1.00 | 0.00 |
| ATOM | 75  | C6   | DC | 3 | -3.960  | 3.064  | -12.229 | 1.00 | 0.00 |
| ATOM | 76  | H6   | DC | 3 | -4.752  | 3.794  | -12.312 | 1.00 | 0.00 |
| ATOM | 77  | C5   | DC | 3 | -2.674  | 3.493  | -12.155 | 1.00 | 0.00 |
| ATOM | 78  | H5   | DC | 3 | -2.452  | 4.560  | -12.180 | 1.00 | 0.00 |
| ATOM | 79  | C4   | DC | 3 | -1.661  | 2.486  | -12.045 | 1.00 | 0.00 |
| ATOM | 80  | N4   | DC | 3 | -0.385  | 2.833  | -11.968 | 1.00 | 0.00 |
| ATOM | 81  | H41  | DC | 3 | 0.299   | 2.094  | -11.891 | 1.00 | 0.00 |
| ATOM | 82  | H42  | DC | 3 | -0.120  | 3.808  | -11.986 | 1.00 | 0.00 |
| ATOM | 83  | N3   | DC | 3 | -1.968  | 1.183  | -12.017 | 1.00 | 0.00 |
| ATOM | 84  | C2   | DC | 3 | -3.260  | 0.775  | -12.093 | 1.00 | 0.00 |
| ATOM | 85  | O2   | DC | 3 | -3.582  | -0.419 | -12.071 | 1.00 | 0.00 |
| ATOM | 86  | C3'  | DC | 3 | -7.888  | 2.084  | -12.495 | 1.00 | 0.00 |
| ATOM | 87  | H3'  | DC | 3 | -8.501  | 2.978  | -12.384 | 1.00 | 0.00 |
| ATOM | 88  | C2'  | DC | 3 | -6.666  | 2.188  | -11.583 | 1.00 | 0.00 |
| ATOM | 89  | H2'  | DC | 3 | -6.649  | 3.169  | -11.108 | 1.00 | 0.00 |
| ATOM | 90  | H2'' | DC | 3 | -6.717  | 1.415  | -10.817 | 1.00 | 0.00 |
| ATOM | 91  | O3'  | DC | 3 | -8.645  | 0.936  | -12.137 | 1.00 | 0.00 |
| ATOM | 92  | P    | DG | 4 | -8.949  | 0.657  | -10.591 | 1.00 | 0.00 |
| ATOM | 93  | OP1  | DG | 4 | -8.716  | 1.892  | -9.809  | 1.00 | 0.00 |
| ATOM | 94  | OP2  | DG | 4 | -10.292 | 0.050  | -10.450 | 1.00 | 0.00 |
| ATOM | 95  | O5'  | DG | 4 | -7.826  | -0.427 | -10.238 | 1.00 | 0.00 |
| ATOM | 96  | C5'  | DG | 4 | -7.510  | -1.443 | -11.206 | 1.00 | 0.00 |
| ATOM | 97  | H5'  | DG | 4 | -6.730  | -1.079 | -11.875 | 1.00 | 0.00 |
| ATOM | 98  | H5'' | DG | 4 | -8.401  | -1.683 | -11.786 | 1.00 | 0.00 |
| ATOM | 99  | C4'  | DG | 4 | -7.020  | -2.695 | -10.503 | 1.00 | 0.00 |
| ATOM | 100 | H4'  | DG | 4 | -7.119  | -3.551 | -11.171 | 1.00 | 0.00 |
| ATOM | 101 | O4'  | DG | 4 | -5.586  | -2.575 | -10.273 | 1.00 | 0.00 |
| ATOM | 102 | C1'  | DG | 4 | -5.333  | -2.308 | -8.902  | 1.00 | 0.00 |
| ATOM | 103 | H1'  | DG | 4 | -4.710  | -3.099 | -8.484  | 1.00 | 0.00 |
| ATOM | 104 | N9   | DG | 4 | -4.468  | -1.098 | -8.820  | 1.00 | 0.00 |
| ATOM | 105 | C8   | DG | 4 | -4.827  | 0.232  | -8.834  | 1.00 | 0.00 |
| ATOM | 106 | H8   | DG | 4 | -5.868  | 0.509  | -8.915  | 1.00 | 0.00 |
| ATOM | 107 | N7   | DG | 4 | -3.814  | 1.059  | -8.745  | 1.00 | 0.00 |
| ATOM | 108 | C5   | DG | 4 | -2.705  | 0.218  | -8.666  | 1.00 | 0.00 |
| ATOM | 109 | C6   | DG | 4 | -1.326  | 0.532  | -8.553  | 1.00 | 0.00 |
| ATOM | 110 | O6   | DG | 4 | -0.790  | 1.635  | -8.497  | 1.00 | 0.00 |
| ATOM | 111 | N1   | DG | 4 | -0.540  | -0.628 | -8.503  | 1.00 | 0.00 |
| ATOM | 112 | H1   | DG | 4 | 0.450   | -0.509 | -8.421  | 1.00 | 0.00 |
| ATOM | 113 | C2   | DG | 4 | -1.023  | -1.921 | -8.556  | 1.00 | 0.00 |
| ATOM | 114 | N2   | DG | 4 | -0.108  | -2.891 | -8.493  | 1.00 | 0.00 |
| ATOM | 115 | H21  | DG | 4 | 0.893   | -2.778 | -8.423  | 1.00 | 0.00 |
| ATOM | 116 | H22  | DG | 4 | -0.452  | -3.839 | -8.540  | 1.00 | 0.00 |
| ATOM | 117 | N3   | DG | 4 | -2.317  | -2.214 | -8.662  | 1.00 | 0.00 |

|      |     |      |    |   |        |        |        |      |      |
|------|-----|------|----|---|--------|--------|--------|------|------|
| ATOM | 118 | C4   | DG | 4 | -3.094 | -1.101 | -8.711 | 1.00 | 0.00 |
| ATOM | 119 | C3'  | DG | 4 | -7.607 | -2.950 | -9.115 | 1.00 | 0.00 |
| ATOM | 120 | H3'  | DG | 4 | -8.629 | -2.586 | -9.004 | 1.00 | 0.00 |
| ATOM | 121 | C2'  | DG | 4 | -6.679 | -2.148 | -8.203 | 1.00 | 0.00 |
| ATOM | 122 | H2'  | DG | 4 | -7.241 | -1.344 | -7.728 | 1.00 | 0.00 |
| ATOM | 123 | H2'' | DG | 4 | -6.267 | -2.804 | -7.436 | 1.00 | 0.00 |
| ATOM | 124 | O3'  | DG | 4 | -7.545 | -4.324 | -8.757 | 1.00 | 0.00 |
| ATOM | 125 | P    | DA | 5 | -7.626 | -4.728 | -7.211 | 1.00 | 0.00 |
| ATOM | 126 | OP1  | DA | 5 | -8.164 | -3.592 | -6.429 | 1.00 | 0.00 |
| ATOM | 127 | OP2  | DA | 5 | -8.356 | -6.009 | -7.070 | 1.00 | 0.00 |
| ATOM | 128 | O5'  | DA | 5 | -6.081 | -4.945 | -6.858 | 1.00 | 0.00 |
| ATOM | 129 | C5'  | DA | 5 | -5.227 | -5.582 | -7.826 | 1.00 | 0.00 |
| ATOM | 130 | H5'  | DA | 5 | -4.810 | -4.829 | -8.495 | 1.00 | 0.00 |
| ATOM | 131 | H5'' | DA | 5 | -5.807 | -6.301 | -8.405 | 1.00 | 0.00 |
| ATOM | 132 | C4'  | DA | 5 | -4.095 | -6.306 | -7.123 | 1.00 | 0.00 |
| ATOM | 133 | H4'  | DA | 5 | -3.672 | -7.056 | -7.791 | 1.00 | 0.00 |
| ATOM | 134 | O4'  | DA | 5 | -3.006 | -5.367 | -6.893 | 1.00 | 0.00 |
| ATOM | 135 | C1'  | DA | 5 | -2.958 | -5.002 | -5.522 | 1.00 | 0.00 |
| ATOM | 136 | H1'  | DA | 5 | -2.017 | -5.267 | -5.040 | 1.00 | 0.00 |
| ATOM | 137 | N9   | DA | 5 | -2.969 | -3.515 | -5.440 | 1.00 | 0.00 |
| ATOM | 138 | C8   | DA | 5 | -4.043 | -2.654 | -5.455 | 1.00 | 0.00 |
| ATOM | 139 | H8   | DA | 5 | -5.049 | -3.046 | -5.487 | 1.00 | 0.00 |
| ATOM | 140 | N7   | DA | 5 | -3.715 | -1.402 | -5.366 | 1.00 | 0.00 |
| ATOM | 141 | C5   | DA | 5 | -2.330 | -1.422 | -5.287 | 1.00 | 0.00 |
| ATOM | 142 | C6   | DA | 5 | -1.373 | -0.401 | -5.175 | 1.00 | 0.00 |
| ATOM | 143 | N6   | DA | 5 | -1.684 | 0.902  | -5.121 | 1.00 | 0.00 |
| ATOM | 144 | H61  | DA | 5 | -0.952 | 1.593  | -5.040 | 1.00 | 0.00 |
| ATOM | 145 | H62  | DA | 5 | -2.650 | 1.193  | -5.161 | 1.00 | 0.00 |
| ATOM | 146 | N1   | DA | 5 | -0.079 | -0.769 | -5.121 | 1.00 | 0.00 |
| ATOM | 147 | C2   | DA | 5 | 0.223  | -2.065 | -5.175 | 1.00 | 0.00 |
| ATOM | 148 | H2   | DA | 5 | 1.255  | -2.382 | -5.132 | 1.00 | 0.00 |
| ATOM | 149 | N3   | DA | 5 | -0.580 | -3.101 | -5.279 | 1.00 | 0.00 |
| ATOM | 150 | C4   | DA | 5 | -1.868 | -2.705 | -5.332 | 1.00 | 0.00 |
| ATOM | 151 | C3'  | DA | 5 | -4.420 | -6.858 | -5.735 | 1.00 | 0.00 |
| ATOM | 152 | H3'  | DA | 5 | -5.460 | -7.164 | -5.624 | 1.00 | 0.00 |
| ATOM | 153 | C2'  | DA | 5 | -4.141 | -5.664 | -4.823 | 1.00 | 0.00 |
| ATOM | 154 | H2'  | DA | 5 | -5.069 | -5.344 | -4.348 | 1.00 | 0.00 |
| ATOM | 155 | H2'' | DA | 5 | -3.422 | -5.952 | -4.056 | 1.00 | 0.00 |
| ATOM | 156 | O3'  | DA | 5 | -3.562 | -7.933 | -5.377 | 1.00 | 0.00 |
| ATOM | 157 | P    | DA | 6 | -3.390 | -8.308 | -3.831 | 1.00 | 0.00 |
| ATOM | 158 | OP1  | DA | 6 | -4.493 | -7.705 | -3.049 | 1.00 | 0.00 |
| ATOM | 159 | OP2  | DA | 6 | -3.228 | -9.773 | -3.690 | 1.00 | 0.00 |
| ATOM | 160 | O5'  | DA | 6 | -2.013 | -7.575 | -3.478 | 1.00 | 0.00 |
| ATOM | 161 | C5'  | DA | 6 | -0.948 | -7.588 | -4.446 | 1.00 | 0.00 |
| ATOM | 162 | H5'  | DA | 6 | -1.053 | -6.734 | -5.115 | 1.00 | 0.00 |
| ATOM | 163 | H5'' | DA | 6 | -0.995 | -8.510 | -5.026 | 1.00 | 0.00 |
| ATOM | 164 | C4'  | DA | 6 | 0.394  | -7.509 | -3.743 | 1.00 | 0.00 |
| ATOM | 165 | H4'  | DA | 6 | 1.178  | -7.867 | -4.411 | 1.00 | 0.00 |
| ATOM | 166 | O4'  | DA | 6 | 0.723  | -6.108 | -3.513 | 1.00 | 0.00 |
| ATOM | 167 | C1'  | DA | 6 | 0.547  | -5.785 | -2.142 | 1.00 | 0.00 |
| ATOM | 168 | H1'  | DA | 6 | 1.464  | -5.447 | -1.659 | 1.00 | 0.00 |
| ATOM | 169 | N9   | DA | 6 | -0.336 | -4.589 | -2.060 | 1.00 | 0.00 |
| ATOM | 170 | C8   | DA | 6 | -1.711 | -4.523 | -2.075 | 1.00 | 0.00 |
| ATOM | 171 | H8   | DA | 6 | -2.294 | -5.432 | -2.107 | 1.00 | 0.00 |
| ATOM | 172 | N7   | DA | 6 | -2.182 | -3.318 | -1.986 | 1.00 | 0.00 |
| ATOM | 173 | C5   | DA | 6 | -1.050 | -2.520 | -1.907 | 1.00 | 0.00 |
| ATOM | 174 | C6   | DA | 6 | -0.875 | -1.131 | -1.795 | 1.00 | 0.00 |
| ATOM | 175 | N6   | DA | 6 | -1.892 | -0.260 | -1.741 | 1.00 | 0.00 |
| ATOM | 176 | H61  | DA | 6 | -1.706 | 0.729  | -1.660 | 1.00 | 0.00 |
| ATOM | 177 | H62  | DA | 6 | -2.845 | -0.593 | -1.781 | 1.00 | 0.00 |

|      |     |      |    |   |        |        |        |      |      |
|------|-----|------|----|---|--------|--------|--------|------|------|
| ATOM | 178 | N1   | DA | 6 | 0.388  | -0.669 | -1.741 | 1.00 | 0.00 |
| ATOM | 179 | C2   | DA | 6 | 1.394  | -1.540 | -1.795 | 1.00 | 0.00 |
| ATOM | 180 | H2   | DA | 6 | 2.415  | -1.189 | -1.752 | 1.00 | 0.00 |
| ATOM | 181 | N3   | DA | 6 | 1.354  | -2.850 | -1.899 | 1.00 | 0.00 |
| ATOM | 182 | C4   | DA | 6 | 0.079  | -3.287 | -1.952 | 1.00 | 0.00 |
| ATOM | 183 | C3'  | DA | 6 | 0.455  | -8.146 | -2.355 | 1.00 | 0.00 |
| ATOM | 184 | H3'  | DA | 6 | -0.207 | -9.005 | -2.245 | 1.00 | 0.00 |
| ATOM | 185 | C2'  | DA | 6 | -0.021 | -7.016 | -1.443 | 1.00 | 0.00 |
| ATOM | 186 | H2'  | DA | 6 | -0.959 | -7.302 | -0.968 | 1.00 | 0.00 |
| ATOM | 187 | H2'' | DA | 6 | 0.730  | -6.826 | -0.676 | 1.00 | 0.00 |
| ATOM | 188 | O3'  | DA | 6 | 1.781  | -8.512 | -1.997 | 1.00 | 0.00 |
| ATOM | 189 | P    | DT | 7 | 2.140  | -8.714 | -0.451 | 1.00 | 0.00 |
| ATOM | 190 | OP1  | DT | 7 | 0.894  | -8.874 | 0.331  | 1.00 | 0.00 |
| ATOM | 191 | OP2  | DT | 7 | 3.133  | -9.804 | -0.310 | 1.00 | 0.00 |
| ATOM | 192 | O5'  | DT | 7 | 2.824  | -7.312 | -0.098 | 1.00 | 0.00 |
| ATOM | 193 | C5'  | DT | 7 | 3.693  | -6.696 | -1.066 | 1.00 | 0.00 |
| ATOM | 194 | H5'  | DT | 7 | 3.105  | -6.067 | -1.734 | 1.00 | 0.00 |
| ATOM | 195 | H5'' | DT | 7 | 4.197  | -7.469 | -1.646 | 1.00 | 0.00 |
| ATOM | 196 | C4'  | DT | 7 | 4.732  | -5.843 | -0.363 | 1.00 | 0.00 |
| ATOM | 197 | H4'  | DT | 7 | 5.576  | -5.672 | -1.031 | 1.00 | 0.00 |
| ATOM | 198 | O4'  | DT | 7 | 4.175  | -4.517 | -0.133 | 1.00 | 0.00 |
| ATOM | 199 | C1'  | DT | 7 | 3.843  | -4.359 | 1.238  | 1.00 | 0.00 |
| ATOM | 200 | H1'  | DT | 7 | 4.388  | -3.538 | 1.704  | 1.00 | 0.00 |
| ATOM | 201 | N1   | DT | 7 | 2.425  | -3.910 | 1.320  | 1.00 | 0.00 |
| ATOM | 202 | C6   | DT | 7 | 1.398  | -4.816 | 1.290  | 1.00 | 0.00 |
| ATOM | 203 | H6   | DT | 7 | 1.613  | -5.874 | 1.251  | 1.00 | 0.00 |
| ATOM | 204 | C5   | DT | 7 | 0.117  | -4.420 | 1.363  | 1.00 | 0.00 |
| ATOM | 205 | C7   | DT | 7 | -1.015 | -5.404 | 1.332  | 1.00 | 0.00 |
| ATOM | 206 | H71  | DT | 7 | -0.922 | -6.092 | 2.172  | 1.00 | 0.00 |
| ATOM | 207 | H72  | DT | 7 | -1.963 | -4.871 | 1.403  | 1.00 | 0.00 |
| ATOM | 208 | H73  | DT | 7 | -0.984 | -5.965 | 0.398  | 1.00 | 0.00 |
| ATOM | 209 | C4   | DT | 7 | -0.218 | -3.021 | 1.476  | 1.00 | 0.00 |
| ATOM | 210 | O4   | DT | 7 | -1.361 | -2.564 | 1.549  | 1.00 | 0.00 |
| ATOM | 211 | N3   | DT | 7 | 0.876  | -2.180 | 1.499  | 1.00 | 0.00 |
| ATOM | 212 | H3   | DT | 7 | 0.674  | -1.112 | 1.585  | 1.00 | 0.00 |
| ATOM | 213 | C2   | DT | 7 | 2.202  | -2.558 | 1.425  | 1.00 | 0.00 |
| ATOM | 214 | O2   | DT | 7 | 3.103  | -1.738 | 1.453  | 1.00 | 0.00 |
| ATOM | 215 | C3'  | DT | 7 | 5.157  | -6.323 | 1.025  | 1.00 | 0.00 |
| ATOM | 216 | H3'  | DT | 7 | 5.127  | -7.407 | 1.136  | 1.00 | 0.00 |
| ATOM | 217 | C2'  | DT | 7 | 4.107  | -5.688 | 1.937  | 1.00 | 0.00 |
| ATOM | 218 | H2'  | DT | 7 | 3.516  | -6.471 | 2.412  | 1.00 | 0.00 |
| ATOM | 219 | H2'' | DT | 7 | 4.603  | -5.093 | 2.704  | 1.00 | 0.00 |
| ATOM | 220 | O3'  | DT | 7 | 6.444  | -5.839 | 1.383  | 1.00 | 0.00 |
| ATOM | 221 | P    | DT | 8 | 6.854  | -5.792 | 2.929  | 1.00 | 0.00 |
| ATOM | 222 | OP1  | DT | 8 | 5.939  | -6.654 | 3.711  | 1.00 | 0.00 |
| ATOM | 223 | OP2  | DT | 8 | 8.297  | -6.090 | 3.070  | 1.00 | 0.00 |
| ATOM | 224 | O5'  | DT | 8 | 6.582  | -4.255 | 3.282  | 1.00 | 0.00 |
| ATOM | 225 | C5'  | DT | 8 | 6.924  | -3.246 | 2.314  | 1.00 | 0.00 |
| ATOM | 226 | H5'  | DT | 8 | 6.079  | -3.082 | 1.645  | 1.00 | 0.00 |
| ATOM | 227 | H5'' | DT | 8 | 7.786  | -3.575 | 1.734  | 1.00 | 0.00 |
| ATOM | 228 | C4'  | DT | 8 | 7.263  | -1.946 | 3.017  | 1.00 | 0.00 |
| ATOM | 229 | H4'  | DT | 8 | 7.846  | -1.312 | 2.349  | 1.00 | 0.00 |
| ATOM | 230 | O4'  | DT | 8 | 6.033  | -1.200 | 3.247  | 1.00 | 0.00 |
| ATOM | 231 | C1'  | DT | 8 | 5.671  | -1.268 | 4.618  | 1.00 | 0.00 |
| ATOM | 232 | H1'  | DT | 8 | 5.629  | -0.284 | 5.085  | 1.00 | 0.00 |
| ATOM | 233 | N1   | DT | 8 | 4.260  | -1.738 | 4.700  | 1.00 | 0.00 |
| ATOM | 234 | C6   | DT | 8 | 3.962  | -3.074 | 4.670  | 1.00 | 0.00 |
| ATOM | 235 | H6   | DT | 8 | 4.758  | -3.803 | 4.631  | 1.00 | 0.00 |
| ATOM | 236 | C5   | DT | 8 | 2.693  | -3.508 | 4.743  | 1.00 | 0.00 |
| ATOM | 237 | C7   | DT | 8 | 2.355  | -4.969 | 4.712  | 1.00 | 0.00 |



|      |     |      |    |    |        |        |        |      |      |
|------|-----|------|----|----|--------|--------|--------|------|------|
| ATOM | 238 | H71  | DT | 8  | 2.835  | -5.471 | 5.552  | 1.00 | 0.00 |
| ATOM | 239 | H72  | DT | 8  | 1.275  | -5.094 | 4.783  | 1.00 | 0.00 |
| ATOM | 240 | H73  | DT | 8  | 2.710  | -5.405 | 3.778  | 1.00 | 0.00 |
| ATOM | 241 | C4   | DT | 8  | 1.599  | -2.572 | 4.856  | 1.00 | 0.00 |
| ATOM | 242 | O4   | DT | 8  | 0.406  | -2.874 | 4.929  | 1.00 | 0.00 |
| ATOM | 243 | N3   | DT | 8  | 1.990  | -1.249 | 4.879  | 1.00 | 0.00 |
| ATOM | 244 | H3   | DT | 8  | 1.199  | -0.504 | 4.965  | 1.00 | 0.00 |
| ATOM | 245 | C2   | DT | 8  | 3.285  | -0.775 | 4.805  | 1.00 | 0.00 |
| ATOM | 246 | O2   | DT | 8  | 3.532  | 0.418  | 4.833  | 1.00 | 0.00 |
| ATOM | 247 | C3'  | DT | 8  | 7.888  | -2.084 | 4.405  | 1.00 | 0.00 |
| ATOM | 248 | H3'  | DT | 8  | 8.501  | -2.978 | 4.516  | 1.00 | 0.00 |
| ATOM | 249 | C2'  | DT | 8  | 6.666  | -2.188 | 5.317  | 1.00 | 0.00 |
| ATOM | 250 | H2'  | DT | 8  | 6.649  | -3.169 | 5.792  | 1.00 | 0.00 |
| ATOM | 251 | H2'' | DT | 8  | 6.717  | -1.415 | 6.083  | 1.00 | 0.00 |
| ATOM | 252 | O3'  | DT | 8  | 8.645  | -0.936 | 4.763  | 1.00 | 0.00 |
| ATOM | 253 | P    | DC | 9  | 8.949  | -0.657 | 6.309  | 1.00 | 0.00 |
| ATOM | 254 | OP1  | DC | 9  | 8.716  | -1.892 | 7.091  | 1.00 | 0.00 |
| ATOM | 255 | OP2  | DC | 9  | 10.292 | -0.050 | 6.450  | 1.00 | 0.00 |
| ATOM | 256 | O5'  | DC | 9  | 7.826  | 0.427  | 6.662  | 1.00 | 0.00 |
| ATOM | 257 | C5'  | DC | 9  | 7.510  | 1.443  | 5.694  | 1.00 | 0.00 |
| ATOM | 258 | H5'  | DC | 9  | 6.730  | 1.079  | 5.025  | 1.00 | 0.00 |
| ATOM | 259 | H5'' | DC | 9  | 8.401  | 1.683  | 5.114  | 1.00 | 0.00 |
| ATOM | 260 | C4'  | DC | 9  | 7.020  | 2.695  | 6.397  | 1.00 | 0.00 |
| ATOM | 261 | H4'  | DC | 9  | 7.119  | 3.551  | 5.729  | 1.00 | 0.00 |
| ATOM | 262 | O4'  | DC | 9  | 5.586  | 2.575  | 6.627  | 1.00 | 0.00 |
| ATOM | 263 | C1'  | DC | 9  | 5.333  | 2.308  | 7.998  | 1.00 | 0.00 |
| ATOM | 264 | H1'  | DC | 9  | 4.709  | 3.099  | 8.414  | 1.00 | 0.00 |
| ATOM | 265 | N1   | DC | 9  | 4.468  | 1.098  | 8.080  | 1.00 | 0.00 |
| ATOM | 266 | C6   | DC | 9  | 5.005  | -0.151 | 8.051  | 1.00 | 0.00 |
| ATOM | 267 | H6   | DC | 9  | 6.074  | -0.276 | 7.968  | 1.00 | 0.00 |
| ATOM | 268 | C5   | DC | 9  | 4.217  | -1.254 | 8.125  | 1.00 | 0.00 |
| ATOM | 269 | H5   | DC | 9  | 4.665  | -2.247 | 8.100  | 1.00 | 0.00 |
| ATOM | 270 | C4   | DC | 9  | 2.805  | -1.035 | 8.235  | 1.00 | 0.00 |
| ATOM | 271 | N4   | DC | 9  | 1.977  | -2.066 | 8.312  | 1.00 | 0.00 |
| ATOM | 272 | H41  | DC | 9  | 0.989  | -1.870 | 8.388  | 1.00 | 0.00 |
| ATOM | 273 | H42  | DC | 9  | 2.336  | -3.010 | 8.294  | 1.00 | 0.00 |
| ATOM | 274 | N3   | DC | 9  | 2.287  | 0.199  | 8.263  | 1.00 | 0.00 |
| ATOM | 275 | C2   | DC | 9  | 3.093  | 1.289  | 8.187  | 1.00 | 0.00 |
| ATOM | 276 | O2   | DC | 9  | 2.651  | 2.445  | 8.209  | 1.00 | 0.00 |
| ATOM | 277 | C3'  | DC | 9  | 7.607  | 2.950  | 7.785  | 1.00 | 0.00 |
| ATOM | 278 | H3'  | DC | 9  | 8.629  | 2.586  | 7.896  | 1.00 | 0.00 |
| ATOM | 279 | C2'  | DC | 9  | 6.679  | 2.148  | 8.697  | 1.00 | 0.00 |
| ATOM | 280 | H2'  | DC | 9  | 7.241  | 1.344  | 9.172  | 1.00 | 0.00 |
| ATOM | 281 | H2'' | DC | 9  | 6.267  | 2.804  | 9.464  | 1.00 | 0.00 |
| ATOM | 282 | O3'  | DC | 9  | 7.545  | 4.324  | 8.143  | 1.00 | 0.00 |
| ATOM | 283 | P    | DG | 10 | 7.626  | 4.728  | 9.689  | 1.00 | 0.00 |
| ATOM | 284 | OP1  | DG | 10 | 8.164  | 3.592  | 10.471 | 1.00 | 0.00 |
| ATOM | 285 | OP2  | DG | 10 | 8.356  | 6.009  | 9.830  | 1.00 | 0.00 |
| ATOM | 286 | O5'  | DG | 10 | 6.081  | 4.945  | 10.042 | 1.00 | 0.00 |
| ATOM | 287 | C5'  | DG | 10 | 5.227  | 5.582  | 9.074  | 1.00 | 0.00 |
| ATOM | 288 | H5'  | DG | 10 | 4.810  | 4.829  | 8.405  | 1.00 | 0.00 |
| ATOM | 289 | H5'' | DG | 10 | 5.807  | 6.301  | 8.495  | 1.00 | 0.00 |
| ATOM | 290 | C4'  | DG | 10 | 4.095  | 6.306  | 9.777  | 1.00 | 0.00 |
| ATOM | 291 | H4'  | DG | 10 | 3.672  | 7.056  | 9.109  | 1.00 | 0.00 |
| ATOM | 292 | O4'  | DG | 10 | 3.006  | 5.367  | 10.007 | 1.00 | 0.00 |
| ATOM | 293 | C1'  | DG | 10 | 2.958  | 5.002  | 11.378 | 1.00 | 0.00 |
| ATOM | 294 | H1'  | DG | 10 | 1.989  | 5.276  | 11.796 | 1.00 | 0.00 |
| ATOM | 295 | N9   | DG | 10 | 2.969  | 3.515  | 11.460 | 1.00 | 0.00 |
| ATOM | 296 | C8   | DG | 10 | 4.042  | 2.650  | 11.446 | 1.00 | 0.00 |
| ATOM | 297 | H8   | DG | 10 | 5.047  | 3.037  | 11.365 | 1.00 | 0.00 |

|      |     |      |     |    |        |        |        |      |      |
|------|-----|------|-----|----|--------|--------|--------|------|------|
| ATOM | 298 | N7   | DG  | 10 | 3.708  | 1.385  | 11.535 | 1.00 | 0.00 |
| ATOM | 299 | C5   | DG  | 10 | 2.317  | 1.414  | 11.614 | 1.00 | 0.00 |
| ATOM | 300 | C6   | DG  | 10 | 1.386  | 0.349  | 11.727 | 1.00 | 0.00 |
| ATOM | 301 | O6   | DG  | 10 | 1.600  | -0.858 | 11.783 | 1.00 | 0.00 |
| ATOM | 302 | N1   | DG  | 10 | 0.068  | 0.825  | 11.777 | 1.00 | 0.00 |
| ATOM | 303 | H1   | DG  | 10 | -0.663 | 0.148  | 11.858 | 1.00 | 0.00 |
| ATOM | 304 | C2   | DG  | 10 | -0.301 | 2.155  | 11.724 | 1.00 | 0.00 |
| ATOM | 305 | N2   | DG  | 10 | -1.612 | 2.402  | 11.787 | 1.00 | 0.00 |
| ATOM | 306 | H21  | DG  | 10 | -2.356 | 1.722  | 11.857 | 1.00 | 0.00 |
| ATOM | 307 | H22  | DG  | 10 | -1.891 | 3.372  | 11.740 | 1.00 | 0.00 |
| ATOM | 308 | N3   | DG  | 10 | 0.573  | 3.153  | 11.618 | 1.00 | 0.00 |
| ATOM | 309 | C4   | DG  | 10 | 1.856  | 2.709  | 11.569 | 1.00 | 0.00 |
| ATOM | 310 | C3'  | DG  | 10 | 4.420  | 6.858  | 11.165 | 1.00 | 0.00 |
| ATOM | 311 | H3'  | DG  | 10 | 5.460  | 7.164  | 11.276 | 1.00 | 0.00 |
| ATOM | 312 | C2'  | DG  | 10 | 4.141  | 5.664  | 12.077 | 1.00 | 0.00 |
| ATOM | 313 | H2'  | DG  | 10 | 5.069  | 5.344  | 12.552 | 1.00 | 0.00 |
| ATOM | 314 | H2'' | DG  | 10 | 3.422  | 5.952  | 12.844 | 1.00 | 0.00 |
| ATOM | 315 | O3'  | DG  | 10 | 3.562  | 7.933  | 11.523 | 1.00 | 0.00 |
| ATOM | 316 | P    | DC  | 11 | 3.390  | 8.308  | 13.069 | 1.00 | 0.00 |
| ATOM | 317 | OP1  | DC  | 11 | 4.493  | 7.705  | 13.851 | 1.00 | 0.00 |
| ATOM | 318 | OP2  | DC  | 11 | 3.228  | 9.773  | 13.210 | 1.00 | 0.00 |
| ATOM | 319 | O5'  | DC  | 11 | 2.013  | 7.575  | 13.422 | 1.00 | 0.00 |
| ATOM | 320 | C5'  | DC  | 11 | 0.948  | 7.588  | 12.454 | 1.00 | 0.00 |
| ATOM | 321 | H5'  | DC  | 11 | 1.053  | 6.734  | 11.785 | 1.00 | 0.00 |
| ATOM | 322 | H5'' | DC  | 11 | 0.995  | 8.510  | 11.874 | 1.00 | 0.00 |
| ATOM | 323 | C4'  | DC  | 11 | -0.394 | 7.509  | 13.157 | 1.00 | 0.00 |
| ATOM | 324 | H4'  | DC  | 11 | -1.178 | 7.867  | 12.489 | 1.00 | 0.00 |
| ATOM | 325 | O4'  | DC  | 11 | -0.723 | 6.108  | 13.387 | 1.00 | 0.00 |
| ATOM | 326 | C1'  | DC  | 11 | -0.547 | 5.785  | 14.758 | 1.00 | 0.00 |
| ATOM | 327 | H1'  | DC  | 11 | -1.492 | 5.436  | 15.175 | 1.00 | 0.00 |
| ATOM | 328 | N1   | DC  | 11 | 0.336  | 4.589  | 14.840 | 1.00 | 0.00 |
| ATOM | 329 | C6   | DC  | 11 | 1.690  | 4.713  | 14.811 | 1.00 | 0.00 |
| ATOM | 330 | H6   | DC  | 11 | 2.140  | 5.691  | 14.728 | 1.00 | 0.00 |
| ATOM | 331 | C5   | DC  | 11 | 2.495  | 3.623  | 14.885 | 1.00 | 0.00 |
| ATOM | 332 | H5   | DC  | 11 | 3.578  | 3.743  | 14.860 | 1.00 | 0.00 |
| ATOM | 333 | C4   | DC  | 11 | 1.852  | 2.348  | 14.995 | 1.00 | 0.00 |
| ATOM | 334 | N4   | DC  | 11 | 2.575  | 1.242  | 15.072 | 1.00 | 0.00 |
| ATOM | 335 | H41  | DC  | 11 | 2.083  | 0.364  | 15.148 | 1.00 | 0.00 |
| ATOM | 336 | H42  | DC  | 11 | 3.584  | 1.291  | 15.054 | 1.00 | 0.00 |
| ATOM | 337 | N3   | DC  | 11 | 0.517  | 2.237  | 15.023 | 1.00 | 0.00 |
| ATOM | 338 | C2   | DC  | 11 | -0.270 | 3.340  | 14.947 | 1.00 | 0.00 |
| ATOM | 339 | O2   | DC  | 11 | -1.506 | 3.277  | 14.969 | 1.00 | 0.00 |
| ATOM | 340 | C3'  | DC  | 11 | -0.455 | 8.146  | 14.545 | 1.00 | 0.00 |
| ATOM | 341 | H3'  | DC  | 11 | 0.207  | 9.005  | 14.655 | 1.00 | 0.00 |
| ATOM | 342 | C2'  | DC  | 11 | 0.021  | 7.016  | 15.457 | 1.00 | 0.00 |
| ATOM | 343 | H2'  | DC  | 11 | 0.959  | 7.302  | 15.932 | 1.00 | 0.00 |
| ATOM | 344 | H2'' | DC  | 11 | -0.730 | 6.826  | 16.224 | 1.00 | 0.00 |
| ATOM | 345 | O3'  | DC  | 11 | -1.781 | 8.512  | 14.903 | 1.00 | 0.00 |
| ATOM | 346 | P    | DG3 | 12 | -2.140 | 8.714  | 16.449 | 1.00 | 0.00 |
| ATOM | 347 | OP1  | DG3 | 12 | -0.894 | 8.874  | 17.231 | 1.00 | 0.00 |
| ATOM | 348 | OP2  | DG3 | 12 | -3.133 | 9.804  | 16.590 | 1.00 | 0.00 |
| ATOM | 349 | O5'  | DG3 | 12 | -2.824 | 7.312  | 16.802 | 1.00 | 0.00 |
| ATOM | 350 | C5'  | DG3 | 12 | -3.693 | 6.696  | 15.834 | 1.00 | 0.00 |
| ATOM | 351 | H5'  | DG3 | 12 | -3.105 | 6.067  | 15.166 | 1.00 | 0.00 |
| ATOM | 352 | H5'' | DG3 | 12 | -4.197 | 7.469  | 15.254 | 1.00 | 0.00 |
| ATOM | 353 | C4'  | DG3 | 12 | -4.732 | 5.843  | 16.537 | 1.00 | 0.00 |
| ATOM | 354 | H4'  | DG3 | 12 | -5.576 | 5.672  | 15.869 | 1.00 | 0.00 |
| ATOM | 355 | O4'  | DG3 | 12 | -4.175 | 4.517  | 16.767 | 1.00 | 0.00 |
| ATOM | 356 | C1'  | DG3 | 12 | -3.843 | 4.359  | 18.138 | 1.00 | 0.00 |
| ATOM | 357 | H1'  | DG3 | 12 | -4.403 | 3.522  | 18.556 | 1.00 | 0.00 |

|      |     |      |     |    |        |        |        |      |      |
|------|-----|------|-----|----|--------|--------|--------|------|------|
| ATOM | 358 | N9   | DG3 | 12 | -2.425 | 3.910  | 18.220 | 1.00 | 0.00 |
| ATOM | 359 | C8   | DG3 | 12 | -1.271 | 4.663  | 18.206 | 1.00 | 0.00 |
| ATOM | 360 | H8   | DG3 | 12 | -1.328 | 5.738  | 18.125 | 1.00 | 0.00 |
| ATOM | 361 | N7   | DG3 | 12 | -0.171 | 3.954  | 18.295 | 1.00 | 0.00 |
| ATOM | 362 | C5   | DG3 | 12 | -0.629 | 2.640  | 18.374 | 1.00 | 0.00 |
| ATOM | 363 | C6   | DG3 | 12 | 0.096  | 1.426  | 18.487 | 1.00 | 0.00 |
| ATOM | 364 | O6   | DG3 | 12 | 1.311  | 1.257  | 18.543 | 1.00 | 0.00 |
| ATOM | 365 | N1   | DG3 | 12 | -0.764 | 0.319  | 18.537 | 1.00 | 0.00 |
| ATOM | 366 | H1   | DG3 | 12 | -0.346 | -0.586 | 18.618 | 1.00 | 0.00 |
| ATOM | 367 | C2   | DG3 | 12 | -2.143 | 0.379  | 18.484 | 1.00 | 0.00 |
| ATOM | 368 | N2   | DG3 | 12 | -2.783 | -0.791 | 18.547 | 1.00 | 0.00 |
| ATOM | 369 | H21  | DG3 | 12 | -2.367 | -1.709 | 18.617 | 1.00 | 0.00 |
| ATOM | 370 | H22  | DG3 | 12 | -3.791 | -0.757 | 18.500 | 1.00 | 0.00 |
| ATOM | 371 | N3   | DG3 | 12 | -2.822 | 1.519  | 18.378 | 1.00 | 0.00 |
| ATOM | 372 | C4   | DG3 | 12 | -2.003 | 2.603  | 18.329 | 1.00 | 0.00 |
| ATOM | 373 | C3'  | DG3 | 12 | -5.157 | 6.323  | 17.925 | 1.00 | 0.00 |
| ATOM | 374 | H3'  | DG3 | 12 | -5.127 | 7.407  | 18.036 | 1.00 | 0.00 |
| ATOM | 375 | C2'  | DG3 | 12 | -4.107 | 5.688  | 18.837 | 1.00 | 0.00 |
| ATOM | 376 | H2'  | DG3 | 12 | -3.516 | 6.471  | 19.312 | 1.00 | 0.00 |
| ATOM | 377 | H2'' | DG3 | 12 | -4.603 | 5.093  | 19.604 | 1.00 | 0.00 |
| ATOM | 378 | O3'  | DG3 | 12 | -6.444 | 5.839  | 18.283 | 1.00 | 0.00 |
| ATOM | 379 | HO3' | DG3 | 12 | -6.754 | 6.115  | 19.149 | 1.00 | 0.00 |
| TER  |     |      |     |    |        |        |        |      |      |
| ATOM | 380 | HO5' | DC5 | 13 | 2.921  | -7.620 | 20.685 | 1.00 | 0.00 |
| ATOM | 381 | O5'  | DC5 | 13 | 2.013  | -7.575 | 20.378 | 1.00 | 0.00 |
| ATOM | 382 | C5'  | DC5 | 13 | 0.948  | -7.588 | 21.346 | 1.00 | 0.00 |
| ATOM | 383 | H5'  | DC5 | 13 | 1.053  | -6.734 | 22.015 | 1.00 | 0.00 |
| ATOM | 384 | H5'' | DC5 | 13 | 0.996  | -8.510 | 21.925 | 1.00 | 0.00 |
| ATOM | 385 | C4'  | DC5 | 13 | -0.394 | -7.509 | 20.643 | 1.00 | 0.00 |
| ATOM | 386 | H4'  | DC5 | 13 | -1.178 | -7.867 | 21.311 | 1.00 | 0.00 |
| ATOM | 387 | O4'  | DC5 | 13 | -0.723 | -6.108 | 20.413 | 1.00 | 0.00 |
| ATOM | 388 | C1'  | DC5 | 13 | -0.547 | -5.785 | 19.042 | 1.00 | 0.00 |
| ATOM | 389 | H1'  | DC5 | 13 | -1.492 | -5.436 | 18.625 | 1.00 | 0.00 |
| ATOM | 390 | N1   | DC5 | 13 | 0.336  | -4.589 | 18.960 | 1.00 | 0.00 |
| ATOM | 391 | C6   | DC5 | 13 | 1.690  | -4.713 | 18.989 | 1.00 | 0.00 |
| ATOM | 392 | H6   | DC5 | 13 | 2.140  | -5.691 | 19.072 | 1.00 | 0.00 |
| ATOM | 393 | C5   | DC5 | 13 | 2.495  | -3.623 | 18.915 | 1.00 | 0.00 |
| ATOM | 394 | H5   | DC5 | 13 | 3.578  | -3.743 | 18.940 | 1.00 | 0.00 |
| ATOM | 395 | C4   | DC5 | 13 | 1.852  | -2.348 | 18.805 | 1.00 | 0.00 |
| ATOM | 396 | N4   | DC5 | 13 | 2.575  | -1.242 | 18.728 | 1.00 | 0.00 |
| ATOM | 397 | H41  | DC5 | 13 | 2.083  | -0.364 | 18.652 | 1.00 | 0.00 |
| ATOM | 398 | H42  | DC5 | 13 | 3.584  | -1.291 | 18.746 | 1.00 | 0.00 |
| ATOM | 399 | N3   | DC5 | 13 | 0.517  | -2.237 | 18.777 | 1.00 | 0.00 |
| ATOM | 400 | C2   | DC5 | 13 | -0.270 | -3.340 | 18.853 | 1.00 | 0.00 |
| ATOM | 401 | O2   | DC5 | 13 | -1.506 | -3.277 | 18.831 | 1.00 | 0.00 |
| ATOM | 402 | C3'  | DC5 | 13 | -0.455 | -8.146 | 19.255 | 1.00 | 0.00 |
| ATOM | 403 | H3'  | DC5 | 13 | 0.207  | -9.005 | 19.145 | 1.00 | 0.00 |
| ATOM | 404 | C2'  | DC5 | 13 | 0.021  | -7.016 | 18.343 | 1.00 | 0.00 |
| ATOM | 405 | H2'  | DC5 | 13 | 0.959  | -7.302 | 17.868 | 1.00 | 0.00 |
| ATOM | 406 | H2'' | DC5 | 13 | -0.730 | -6.826 | 17.576 | 1.00 | 0.00 |
| ATOM | 407 | O3'  | DC5 | 13 | -1.781 | -8.512 | 18.897 | 1.00 | 0.00 |
| ATOM | 408 | P    | DG  | 14 | -2.140 | -8.714 | 17.351 | 1.00 | 0.00 |
| ATOM | 409 | OP1  | DG  | 14 | -0.894 | -8.874 | 16.569 | 1.00 | 0.00 |
| ATOM | 410 | OP2  | DG  | 14 | -3.133 | -9.804 | 17.210 | 1.00 | 0.00 |
| ATOM | 411 | O5'  | DG  | 14 | -2.824 | -7.312 | 16.998 | 1.00 | 0.00 |
| ATOM | 412 | C5'  | DG  | 14 | -3.693 | -6.696 | 17.966 | 1.00 | 0.00 |
| ATOM | 413 | H5'  | DG  | 14 | -3.105 | -6.067 | 18.634 | 1.00 | 0.00 |
| ATOM | 414 | H5'' | DG  | 14 | -4.197 | -7.469 | 18.546 | 1.00 | 0.00 |
| ATOM | 415 | C4'  | DG  | 14 | -4.732 | -5.843 | 17.263 | 1.00 | 0.00 |
| ATOM | 416 | H4'  | DG  | 14 | -5.576 | -5.672 | 17.931 | 1.00 | 0.00 |

|      |     |      |    |    |         |        |        |      |      |
|------|-----|------|----|----|---------|--------|--------|------|------|
| ATOM | 417 | O4'  | DG | 14 | -4.175  | -4.517 | 17.033 | 1.00 | 0.00 |
| ATOM | 418 | C1'  | DG | 14 | -3.843  | -4.359 | 15.662 | 1.00 | 0.00 |
| ATOM | 419 | H1'  | DG | 14 | -4.403  | -3.522 | 15.244 | 1.00 | 0.00 |
| ATOM | 420 | N9   | DG | 14 | -2.425  | -3.910 | 15.580 | 1.00 | 0.00 |
| ATOM | 421 | C8   | DG | 14 | -1.271  | -4.663 | 15.594 | 1.00 | 0.00 |
| ATOM | 422 | H8   | DG | 14 | -1.328  | -5.738 | 15.675 | 1.00 | 0.00 |
| ATOM | 423 | N7   | DG | 14 | -0.171  | -3.954 | 15.505 | 1.00 | 0.00 |
| ATOM | 424 | C5   | DG | 14 | -0.629  | -2.640 | 15.426 | 1.00 | 0.00 |
| ATOM | 425 | C6   | DG | 14 | 0.096   | -1.426 | 15.313 | 1.00 | 0.00 |
| ATOM | 426 | O6   | DG | 14 | 1.311   | -1.257 | 15.257 | 1.00 | 0.00 |
| ATOM | 427 | N1   | DG | 14 | -0.764  | -0.319 | 15.263 | 1.00 | 0.00 |
| ATOM | 428 | H1   | DG | 14 | -0.346  | 0.586  | 15.182 | 1.00 | 0.00 |
| ATOM | 429 | C2   | DG | 14 | -2.143  | -0.379 | 15.316 | 1.00 | 0.00 |
| ATOM | 430 | N2   | DG | 14 | -2.783  | 0.791  | 15.253 | 1.00 | 0.00 |
| ATOM | 431 | H21  | DG | 14 | -2.367  | 1.709  | 15.183 | 1.00 | 0.00 |
| ATOM | 432 | H22  | DG | 14 | -3.791  | 0.757  | 15.300 | 1.00 | 0.00 |
| ATOM | 433 | N3   | DG | 14 | -2.822  | -1.519 | 15.422 | 1.00 | 0.00 |
| ATOM | 434 | C4   | DG | 14 | -2.003  | -2.603 | 15.471 | 1.00 | 0.00 |
| ATOM | 435 | C3'  | DG | 14 | -5.157  | -6.323 | 15.875 | 1.00 | 0.00 |
| ATOM | 436 | H3'  | DG | 14 | -5.127  | -7.407 | 15.764 | 1.00 | 0.00 |
| ATOM | 437 | C2'  | DG | 14 | -4.107  | -5.688 | 14.963 | 1.00 | 0.00 |
| ATOM | 438 | H2'  | DG | 14 | -3.516  | -6.471 | 14.488 | 1.00 | 0.00 |
| ATOM | 439 | H2'' | DG | 14 | -4.603  | -5.093 | 14.196 | 1.00 | 0.00 |
| ATOM | 440 | O3'  | DG | 14 | -6.444  | -5.839 | 15.517 | 1.00 | 0.00 |
| ATOM | 441 | P    | DC | 15 | -6.854  | -5.792 | 13.971 | 1.00 | 0.00 |
| ATOM | 442 | OP1  | DC | 15 | -5.939  | -6.654 | 13.189 | 1.00 | 0.00 |
| ATOM | 443 | OP2  | DC | 15 | -8.297  | -6.090 | 13.830 | 1.00 | 0.00 |
| ATOM | 444 | O5'  | DC | 15 | -6.582  | -4.255 | 13.618 | 1.00 | 0.00 |
| ATOM | 445 | C5'  | DC | 15 | -6.924  | -3.246 | 14.586 | 1.00 | 0.00 |
| ATOM | 446 | H5'  | DC | 15 | -6.079  | -3.082 | 15.255 | 1.00 | 0.00 |
| ATOM | 447 | H5'' | DC | 15 | -7.786  | -3.575 | 15.166 | 1.00 | 0.00 |
| ATOM | 448 | C4'  | DC | 15 | -7.263  | -1.946 | 13.883 | 1.00 | 0.00 |
| ATOM | 449 | H4'  | DC | 15 | -7.846  | -1.312 | 14.551 | 1.00 | 0.00 |
| ATOM | 450 | O4'  | DC | 15 | -6.033  | -1.200 | 13.653 | 1.00 | 0.00 |
| ATOM | 451 | C1'  | DC | 15 | -5.671  | -1.268 | 12.282 | 1.00 | 0.00 |
| ATOM | 452 | H1'  | DC | 15 | -5.632  | -0.262 | 11.865 | 1.00 | 0.00 |
| ATOM | 453 | N1   | DC | 15 | -4.260  | -1.738 | 12.200 | 1.00 | 0.00 |
| ATOM | 454 | C6   | DC | 15 | -3.960  | -3.064 | 12.229 | 1.00 | 0.00 |
| ATOM | 455 | H6   | DC | 15 | -4.752  | -3.794 | 12.312 | 1.00 | 0.00 |
| ATOM | 456 | C5   | DC | 15 | -2.674  | -3.493 | 12.155 | 1.00 | 0.00 |
| ATOM | 457 | H5   | DC | 15 | -2.452  | -4.560 | 12.180 | 1.00 | 0.00 |
| ATOM | 458 | C4   | DC | 15 | -1.661  | -2.486 | 12.045 | 1.00 | 0.00 |
| ATOM | 459 | N4   | DC | 15 | -0.385  | -2.833 | 11.968 | 1.00 | 0.00 |
| ATOM | 460 | H41  | DC | 15 | 0.299   | -2.094 | 11.891 | 1.00 | 0.00 |
| ATOM | 461 | H42  | DC | 15 | -0.120  | -3.808 | 11.986 | 1.00 | 0.00 |
| ATOM | 462 | N3   | DC | 15 | -1.968  | -1.183 | 12.017 | 1.00 | 0.00 |
| ATOM | 463 | C2   | DC | 15 | -3.260  | -0.775 | 12.093 | 1.00 | 0.00 |
| ATOM | 464 | O2   | DC | 15 | -3.582  | 0.419  | 12.071 | 1.00 | 0.00 |
| ATOM | 465 | C3'  | DC | 15 | -7.888  | -2.084 | 12.495 | 1.00 | 0.00 |
| ATOM | 466 | H3'  | DC | 15 | -8.501  | -2.978 | 12.384 | 1.00 | 0.00 |
| ATOM | 467 | C2'  | DC | 15 | -6.666  | -2.188 | 11.583 | 1.00 | 0.00 |
| ATOM | 468 | H2'  | DC | 15 | -6.649  | -3.169 | 11.108 | 1.00 | 0.00 |
| ATOM | 469 | H2'' | DC | 15 | -6.717  | -1.415 | 10.817 | 1.00 | 0.00 |
| ATOM | 470 | O3'  | DC | 15 | -8.645  | -0.936 | 12.137 | 1.00 | 0.00 |
| ATOM | 471 | P    | DG | 16 | -8.949  | -0.657 | 10.591 | 1.00 | 0.00 |
| ATOM | 472 | OP1  | DG | 16 | -8.716  | -1.892 | 9.809  | 1.00 | 0.00 |
| ATOM | 473 | OP2  | DG | 16 | -10.292 | -0.050 | 10.450 | 1.00 | 0.00 |
| ATOM | 474 | O5'  | DG | 16 | -7.826  | 0.427  | 10.238 | 1.00 | 0.00 |
| ATOM | 475 | C5'  | DG | 16 | -7.510  | 1.443  | 11.206 | 1.00 | 0.00 |
| ATOM | 476 | H5'  | DG | 16 | -6.730  | 1.079  | 11.875 | 1.00 | 0.00 |

|      |     |        |    |    |        |        |        |      |      |
|------|-----|--------|----|----|--------|--------|--------|------|------|
| ATOM | 477 | H5 ' ' | DG | 16 | -8.401 | 1.683  | 11.786 | 1.00 | 0.00 |
| ATOM | 478 | C4'    | DG | 16 | -7.020 | 2.695  | 10.503 | 1.00 | 0.00 |
| ATOM | 479 | H4'    | DG | 16 | -7.119 | 3.551  | 11.171 | 1.00 | 0.00 |
| ATOM | 480 | O4'    | DG | 16 | -5.586 | 2.575  | 10.273 | 1.00 | 0.00 |
| ATOM | 481 | C1'    | DG | 16 | -5.333 | 2.308  | 8.902  | 1.00 | 0.00 |
| ATOM | 482 | H1'    | DG | 16 | -4.710 | 3.099  | 8.484  | 1.00 | 0.00 |
| ATOM | 483 | N9     | DG | 16 | -4.468 | 1.098  | 8.820  | 1.00 | 0.00 |
| ATOM | 484 | C8     | DG | 16 | -4.827 | -0.232 | 8.834  | 1.00 | 0.00 |
| ATOM | 485 | H8     | DG | 16 | -5.868 | -0.509 | 8.915  | 1.00 | 0.00 |
| ATOM | 486 | N7     | DG | 16 | -3.814 | -1.059 | 8.745  | 1.00 | 0.00 |
| ATOM | 487 | C5     | DG | 16 | -2.705 | -0.218 | 8.666  | 1.00 | 0.00 |
| ATOM | 488 | C6     | DG | 16 | -1.326 | -0.532 | 8.553  | 1.00 | 0.00 |
| ATOM | 489 | O6     | DG | 16 | -0.790 | -1.635 | 8.497  | 1.00 | 0.00 |
| ATOM | 490 | N1     | DG | 16 | -0.540 | 0.628  | 8.503  | 1.00 | 0.00 |
| ATOM | 491 | H1     | DG | 16 | 0.450  | 0.509  | 8.421  | 1.00 | 0.00 |
| ATOM | 492 | C2     | DG | 16 | -1.023 | 1.921  | 8.556  | 1.00 | 0.00 |
| ATOM | 493 | N2     | DG | 16 | -0.108 | 2.891  | 8.493  | 1.00 | 0.00 |
| ATOM | 494 | H21    | DG | 16 | 0.893  | 2.778  | 8.423  | 1.00 | 0.00 |
| ATOM | 495 | H22    | DG | 16 | -0.452 | 3.839  | 8.540  | 1.00 | 0.00 |
| ATOM | 496 | N3     | DG | 16 | -2.317 | 2.214  | 8.662  | 1.00 | 0.00 |
| ATOM | 497 | C4     | DG | 16 | -3.094 | 1.101  | 8.711  | 1.00 | 0.00 |
| ATOM | 498 | C3'    | DG | 16 | -7.607 | 2.950  | 9.115  | 1.00 | 0.00 |
| ATOM | 499 | H3'    | DG | 16 | -8.629 | 2.586  | 9.004  | 1.00 | 0.00 |
| ATOM | 500 | C2'    | DG | 16 | -6.679 | 2.148  | 8.203  | 1.00 | 0.00 |
| ATOM | 501 | H2'    | DG | 16 | -7.241 | 1.344  | 7.728  | 1.00 | 0.00 |
| ATOM | 502 | H2 ' ' | DG | 16 | -6.267 | 2.804  | 7.436  | 1.00 | 0.00 |
| ATOM | 503 | O3'    | DG | 16 | -7.545 | 4.324  | 8.757  | 1.00 | 0.00 |
| ATOM | 504 | P      | DA | 17 | -7.626 | 4.728  | 7.211  | 1.00 | 0.00 |
| ATOM | 505 | OP1    | DA | 17 | -8.164 | 3.592  | 6.429  | 1.00 | 0.00 |
| ATOM | 506 | OP2    | DA | 17 | -8.356 | 6.009  | 7.070  | 1.00 | 0.00 |
| ATOM | 507 | O5'    | DA | 17 | -6.081 | 4.945  | 6.858  | 1.00 | 0.00 |
| ATOM | 508 | C5'    | DA | 17 | -5.227 | 5.582  | 7.826  | 1.00 | 0.00 |
| ATOM | 509 | H5'    | DA | 17 | -4.810 | 4.829  | 8.495  | 1.00 | 0.00 |
| ATOM | 510 | H5 ' ' | DA | 17 | -5.807 | 6.301  | 8.405  | 1.00 | 0.00 |
| ATOM | 511 | C4'    | DA | 17 | -4.095 | 6.306  | 7.123  | 1.00 | 0.00 |
| ATOM | 512 | H4'    | DA | 17 | -3.672 | 7.056  | 7.791  | 1.00 | 0.00 |
| ATOM | 513 | O4'    | DA | 17 | -3.006 | 5.367  | 6.893  | 1.00 | 0.00 |
| ATOM | 514 | C1'    | DA | 17 | -2.958 | 5.002  | 5.522  | 1.00 | 0.00 |
| ATOM | 515 | H1'    | DA | 17 | -2.017 | 5.267  | 5.040  | 1.00 | 0.00 |
| ATOM | 516 | N9     | DA | 17 | -2.969 | 3.515  | 5.440  | 1.00 | 0.00 |
| ATOM | 517 | C8     | DA | 17 | -4.043 | 2.654  | 5.455  | 1.00 | 0.00 |
| ATOM | 518 | H8     | DA | 17 | -5.049 | 3.046  | 5.487  | 1.00 | 0.00 |
| ATOM | 519 | N7     | DA | 17 | -3.715 | 1.402  | 5.366  | 1.00 | 0.00 |
| ATOM | 520 | C5     | DA | 17 | -2.330 | 1.422  | 5.287  | 1.00 | 0.00 |
| ATOM | 521 | C6     | DA | 17 | -1.373 | 0.401  | 5.175  | 1.00 | 0.00 |
| ATOM | 522 | N6     | DA | 17 | -1.684 | -0.902 | 5.121  | 1.00 | 0.00 |
| ATOM | 523 | H61    | DA | 17 | -0.952 | -1.593 | 5.040  | 1.00 | 0.00 |
| ATOM | 524 | H62    | DA | 17 | -2.650 | -1.193 | 5.161  | 1.00 | 0.00 |
| ATOM | 525 | N1     | DA | 17 | -0.079 | 0.769  | 5.121  | 1.00 | 0.00 |
| ATOM | 526 | C2     | DA | 17 | 0.223  | 2.065  | 5.175  | 1.00 | 0.00 |
| ATOM | 527 | H2     | DA | 17 | 1.255  | 2.382  | 5.132  | 1.00 | 0.00 |
| ATOM | 528 | N3     | DA | 17 | -0.580 | 3.101  | 5.279  | 1.00 | 0.00 |
| ATOM | 529 | C4     | DA | 17 | -1.868 | 2.705  | 5.332  | 1.00 | 0.00 |
| ATOM | 530 | C3'    | DA | 17 | -4.420 | 6.858  | 5.735  | 1.00 | 0.00 |
| ATOM | 531 | H3'    | DA | 17 | -5.460 | 7.164  | 5.624  | 1.00 | 0.00 |
| ATOM | 532 | C2'    | DA | 17 | -4.141 | 5.664  | 4.823  | 1.00 | 0.00 |
| ATOM | 533 | H2'    | DA | 17 | -5.069 | 5.344  | 4.348  | 1.00 | 0.00 |
| ATOM | 534 | H2 ' ' | DA | 17 | -3.422 | 5.952  | 4.056  | 1.00 | 0.00 |
| ATOM | 535 | O3'    | DA | 17 | -3.562 | 7.933  | 5.377  | 1.00 | 0.00 |
| ATOM | 536 | P      | DA | 18 | -3.390 | 8.308  | 3.831  | 1.00 | 0.00 |

|      |     |      |    |    |        |        |        |      |      |
|------|-----|------|----|----|--------|--------|--------|------|------|
| ATOM | 537 | OP1  | DA | 18 | -4.493 | 7.705  | 3.049  | 1.00 | 0.00 |
| ATOM | 538 | OP2  | DA | 18 | -3.228 | 9.773  | 3.690  | 1.00 | 0.00 |
| ATOM | 539 | O5'  | DA | 18 | -2.013 | 7.575  | 3.478  | 1.00 | 0.00 |
| ATOM | 540 | C5'  | DA | 18 | -0.948 | 7.588  | 4.446  | 1.00 | 0.00 |
| ATOM | 541 | H5'  | DA | 18 | -1.053 | 6.734  | 5.115  | 1.00 | 0.00 |
| ATOM | 542 | H5'' | DA | 18 | -0.995 | 8.510  | 5.026  | 1.00 | 0.00 |
| ATOM | 543 | C4'  | DA | 18 | 0.394  | 7.509  | 3.743  | 1.00 | 0.00 |
| ATOM | 544 | H4'  | DA | 18 | 1.178  | 7.867  | 4.411  | 1.00 | 0.00 |
| ATOM | 545 | O4'  | DA | 18 | 0.723  | 6.108  | 3.513  | 1.00 | 0.00 |
| ATOM | 546 | C1'  | DA | 18 | 0.547  | 5.785  | 2.142  | 1.00 | 0.00 |
| ATOM | 547 | H1'  | DA | 18 | 1.464  | 5.447  | 1.659  | 1.00 | 0.00 |
| ATOM | 548 | N9   | DA | 18 | -0.336 | 4.589  | 2.060  | 1.00 | 0.00 |
| ATOM | 549 | C8   | DA | 18 | -1.711 | 4.523  | 2.075  | 1.00 | 0.00 |
| ATOM | 550 | H8   | DA | 18 | -2.294 | 5.432  | 2.107  | 1.00 | 0.00 |
| ATOM | 551 | N7   | DA | 18 | -2.182 | 3.318  | 1.986  | 1.00 | 0.00 |
| ATOM | 552 | C5   | DA | 18 | -1.050 | 2.520  | 1.907  | 1.00 | 0.00 |
| ATOM | 553 | C6   | DA | 18 | -0.875 | 1.131  | 1.795  | 1.00 | 0.00 |
| ATOM | 554 | N6   | DA | 18 | -1.892 | 0.260  | 1.741  | 1.00 | 0.00 |
| ATOM | 555 | H61  | DA | 18 | -1.706 | -0.729 | 1.660  | 1.00 | 0.00 |
| ATOM | 556 | H62  | DA | 18 | -2.845 | 0.593  | 1.781  | 1.00 | 0.00 |
| ATOM | 557 | N1   | DA | 18 | 0.388  | 0.669  | 1.741  | 1.00 | 0.00 |
| ATOM | 558 | C2   | DA | 18 | 1.394  | 1.540  | 1.795  | 1.00 | 0.00 |
| ATOM | 559 | H2   | DA | 18 | 2.415  | 1.189  | 1.752  | 1.00 | 0.00 |
| ATOM | 560 | N3   | DA | 18 | 1.354  | 2.850  | 1.899  | 1.00 | 0.00 |
| ATOM | 561 | C4   | DA | 18 | 0.079  | 3.287  | 1.952  | 1.00 | 0.00 |
| ATOM | 562 | C3'  | DA | 18 | 0.455  | 8.146  | 2.355  | 1.00 | 0.00 |
| ATOM | 563 | H3'  | DA | 18 | -0.207 | 9.005  | 2.245  | 1.00 | 0.00 |
| ATOM | 564 | C2'  | DA | 18 | -0.021 | 7.016  | 1.443  | 1.00 | 0.00 |
| ATOM | 565 | H2'  | DA | 18 | -0.959 | 7.302  | 0.968  | 1.00 | 0.00 |
| ATOM | 566 | H2'' | DA | 18 | 0.730  | 6.826  | 0.676  | 1.00 | 0.00 |
| ATOM | 567 | O3'  | DA | 18 | 1.781  | 8.512  | 1.997  | 1.00 | 0.00 |
| ATOM | 568 | P    | DT | 19 | 2.140  | 8.714  | 0.451  | 1.00 | 0.00 |
| ATOM | 569 | OP1  | DT | 19 | 0.894  | 8.874  | -0.331 | 1.00 | 0.00 |
| ATOM | 570 | OP2  | DT | 19 | 3.133  | 9.804  | 0.310  | 1.00 | 0.00 |
| ATOM | 571 | O5'  | DT | 19 | 2.824  | 7.312  | 0.098  | 1.00 | 0.00 |
| ATOM | 572 | C5'  | DT | 19 | 3.693  | 6.696  | 1.066  | 1.00 | 0.00 |
| ATOM | 573 | H5'  | DT | 19 | 3.105  | 6.067  | 1.734  | 1.00 | 0.00 |
| ATOM | 574 | H5'' | DT | 19 | 4.197  | 7.469  | 1.646  | 1.00 | 0.00 |
| ATOM | 575 | C4'  | DT | 19 | 4.732  | 5.843  | 0.363  | 1.00 | 0.00 |
| ATOM | 576 | H4'  | DT | 19 | 5.576  | 5.672  | 1.031  | 1.00 | 0.00 |
| ATOM | 577 | O4'  | DT | 19 | 4.175  | 4.517  | 0.133  | 1.00 | 0.00 |
| ATOM | 578 | C1'  | DT | 19 | 3.843  | 4.359  | -1.238 | 1.00 | 0.00 |
| ATOM | 579 | H1'  | DT | 19 | 4.388  | 3.538  | -1.704 | 1.00 | 0.00 |
| ATOM | 580 | N1   | DT | 19 | 2.425  | 3.910  | -1.320 | 1.00 | 0.00 |
| ATOM | 581 | C6   | DT | 19 | 1.398  | 4.816  | -1.290 | 1.00 | 0.00 |
| ATOM | 582 | H6   | DT | 19 | 1.613  | 5.874  | -1.251 | 1.00 | 0.00 |
| ATOM | 583 | C5   | DT | 19 | 0.117  | 4.420  | -1.363 | 1.00 | 0.00 |
| ATOM | 584 | C7   | DT | 19 | -1.015 | 5.404  | -1.332 | 1.00 | 0.00 |
| ATOM | 585 | H71  | DT | 19 | -0.922 | 6.092  | -2.172 | 1.00 | 0.00 |
| ATOM | 586 | H72  | DT | 19 | -1.963 | 4.871  | -1.403 | 1.00 | 0.00 |
| ATOM | 587 | H73  | DT | 19 | -0.984 | 5.965  | -0.398 | 1.00 | 0.00 |
| ATOM | 588 | C4   | DT | 19 | -0.218 | 3.021  | -1.476 | 1.00 | 0.00 |
| ATOM | 589 | O4   | DT | 19 | -1.361 | 2.564  | -1.549 | 1.00 | 0.00 |
| ATOM | 590 | N3   | DT | 19 | 0.876  | 2.180  | -1.499 | 1.00 | 0.00 |
| ATOM | 591 | H3   | DT | 19 | 0.674  | 1.112  | -1.585 | 1.00 | 0.00 |
| ATOM | 592 | C2   | DT | 19 | 2.202  | 2.558  | -1.425 | 1.00 | 0.00 |
| ATOM | 593 | O2   | DT | 19 | 3.103  | 1.738  | -1.453 | 1.00 | 0.00 |
| ATOM | 594 | C3'  | DT | 19 | 5.157  | 6.323  | -1.025 | 1.00 | 0.00 |
| ATOM | 595 | H3'  | DT | 19 | 5.127  | 7.407  | -1.136 | 1.00 | 0.00 |
| ATOM | 596 | C2'  | DT | 19 | 4.107  | 5.688  | -1.937 | 1.00 | 0.00 |

|      |     |      |    |    |        |        |        |      |      |
|------|-----|------|----|----|--------|--------|--------|------|------|
| ATOM | 597 | H2'  | DT | 19 | 3.516  | 6.471  | -2.412 | 1.00 | 0.00 |
| ATOM | 598 | H2'' | DT | 19 | 4.603  | 5.093  | -2.704 | 1.00 | 0.00 |
| ATOM | 599 | O3'  | DT | 19 | 6.444  | 5.839  | -1.383 | 1.00 | 0.00 |
| ATOM | 600 | P    | DT | 20 | 6.854  | 5.792  | -2.929 | 1.00 | 0.00 |
| ATOM | 601 | OP1  | DT | 20 | 5.939  | 6.654  | -3.711 | 1.00 | 0.00 |
| ATOM | 602 | OP2  | DT | 20 | 8.297  | 6.090  | -3.070 | 1.00 | 0.00 |
| ATOM | 603 | O5'  | DT | 20 | 6.582  | 4.255  | -3.282 | 1.00 | 0.00 |
| ATOM | 604 | C5'  | DT | 20 | 6.924  | 3.246  | -2.314 | 1.00 | 0.00 |
| ATOM | 605 | H5'  | DT | 20 | 6.079  | 3.082  | -1.645 | 1.00 | 0.00 |
| ATOM | 606 | H5'' | DT | 20 | 7.786  | 3.575  | -1.734 | 1.00 | 0.00 |
| ATOM | 607 | C4'  | DT | 20 | 7.263  | 1.946  | -3.017 | 1.00 | 0.00 |
| ATOM | 608 | H4'  | DT | 20 | 7.846  | 1.312  | -2.349 | 1.00 | 0.00 |
| ATOM | 609 | O4'  | DT | 20 | 6.033  | 1.200  | -3.247 | 1.00 | 0.00 |
| ATOM | 610 | C1'  | DT | 20 | 5.671  | 1.268  | -4.618 | 1.00 | 0.00 |
| ATOM | 611 | H1'  | DT | 20 | 5.629  | 0.284  | -5.085 | 1.00 | 0.00 |
| ATOM | 612 | N1   | DT | 20 | 4.260  | 1.738  | -4.700 | 1.00 | 0.00 |
| ATOM | 613 | C6   | DT | 20 | 3.962  | 3.074  | -4.670 | 1.00 | 0.00 |
| ATOM | 614 | H6   | DT | 20 | 4.758  | 3.803  | -4.631 | 1.00 | 0.00 |
| ATOM | 615 | C5   | DT | 20 | 2.693  | 3.508  | -4.743 | 1.00 | 0.00 |
| ATOM | 616 | C7   | DT | 20 | 2.355  | 4.969  | -4.712 | 1.00 | 0.00 |
| ATOM | 617 | H71  | DT | 20 | 2.835  | 5.471  | -5.552 | 1.00 | 0.00 |
| ATOM | 618 | H72  | DT | 20 | 1.275  | 5.094  | -4.783 | 1.00 | 0.00 |
| ATOM | 619 | H73  | DT | 20 | 2.710  | 5.405  | -3.778 | 1.00 | 0.00 |
| ATOM | 620 | C4   | DT | 20 | 1.599  | 2.572  | -4.856 | 1.00 | 0.00 |
| ATOM | 621 | O4   | DT | 20 | 0.406  | 2.874  | -4.929 | 1.00 | 0.00 |
| ATOM | 622 | N3   | DT | 20 | 1.990  | 1.249  | -4.879 | 1.00 | 0.00 |
| ATOM | 623 | H3   | DT | 20 | 1.199  | 0.504  | -4.965 | 1.00 | 0.00 |
| ATOM | 624 | C2   | DT | 20 | 3.285  | 0.775  | -4.805 | 1.00 | 0.00 |
| ATOM | 625 | O2   | DT | 20 | 3.532  | -0.418 | -4.833 | 1.00 | 0.00 |
| ATOM | 626 | C3'  | DT | 20 | 7.888  | 2.084  | -4.405 | 1.00 | 0.00 |
| ATOM | 627 | H3'  | DT | 20 | 8.501  | 2.978  | -4.516 | 1.00 | 0.00 |
| ATOM | 628 | C2'  | DT | 20 | 6.666  | 2.188  | -5.317 | 1.00 | 0.00 |
| ATOM | 629 | H2'  | DT | 20 | 6.649  | 3.169  | -5.792 | 1.00 | 0.00 |
| ATOM | 630 | H2'' | DT | 20 | 6.717  | 1.415  | -6.083 | 1.00 | 0.00 |
| ATOM | 631 | O3'  | DT | 20 | 8.645  | 0.936  | -4.763 | 1.00 | 0.00 |
| ATOM | 632 | P    | DC | 21 | 8.949  | 0.657  | -6.309 | 1.00 | 0.00 |
| ATOM | 633 | OP1  | DC | 21 | 8.716  | 1.892  | -7.091 | 1.00 | 0.00 |
| ATOM | 634 | OP2  | DC | 21 | 10.292 | 0.050  | -6.450 | 1.00 | 0.00 |
| ATOM | 635 | O5'  | DC | 21 | 7.826  | -0.427 | -6.662 | 1.00 | 0.00 |
| ATOM | 636 | C5'  | DC | 21 | 7.510  | -1.443 | -5.694 | 1.00 | 0.00 |
| ATOM | 637 | H5'  | DC | 21 | 6.730  | -1.079 | -5.025 | 1.00 | 0.00 |
| ATOM | 638 | H5'' | DC | 21 | 8.401  | -1.683 | -5.114 | 1.00 | 0.00 |
| ATOM | 639 | C4'  | DC | 21 | 7.020  | -2.695 | -6.397 | 1.00 | 0.00 |
| ATOM | 640 | H4'  | DC | 21 | 7.119  | -3.551 | -5.729 | 1.00 | 0.00 |
| ATOM | 641 | O4'  | DC | 21 | 5.586  | -2.575 | -6.627 | 1.00 | 0.00 |
| ATOM | 642 | C1'  | DC | 21 | 5.333  | -2.308 | -7.998 | 1.00 | 0.00 |
| ATOM | 643 | H1'  | DC | 21 | 4.709  | -3.099 | -8.414 | 1.00 | 0.00 |
| ATOM | 644 | N1   | DC | 21 | 4.468  | -1.098 | -8.080 | 1.00 | 0.00 |
| ATOM | 645 | C6   | DC | 21 | 5.005  | 0.151  | -8.051 | 1.00 | 0.00 |
| ATOM | 646 | H6   | DC | 21 | 6.074  | 0.276  | -7.968 | 1.00 | 0.00 |
| ATOM | 647 | C5   | DC | 21 | 4.217  | 1.254  | -8.125 | 1.00 | 0.00 |
| ATOM | 648 | H5   | DC | 21 | 4.665  | 2.247  | -8.100 | 1.00 | 0.00 |
| ATOM | 649 | C4   | DC | 21 | 2.805  | 1.035  | -8.235 | 1.00 | 0.00 |
| ATOM | 650 | N4   | DC | 21 | 1.977  | 2.066  | -8.312 | 1.00 | 0.00 |
| ATOM | 651 | H41  | DC | 21 | 0.989  | 1.870  | -8.388 | 1.00 | 0.00 |
| ATOM | 652 | H42  | DC | 21 | 2.336  | 3.010  | -8.294 | 1.00 | 0.00 |
| ATOM | 653 | N3   | DC | 21 | 2.287  | -0.199 | -8.263 | 1.00 | 0.00 |
| ATOM | 654 | C2   | DC | 21 | 3.093  | -1.289 | -8.187 | 1.00 | 0.00 |
| ATOM | 655 | O2   | DC | 21 | 2.651  | -2.445 | -8.209 | 1.00 | 0.00 |
| ATOM | 656 | C3'  | DC | 21 | 7.607  | -2.950 | -7.785 | 1.00 | 0.00 |

|      |     |      |    |    |        |        |         |      |      |
|------|-----|------|----|----|--------|--------|---------|------|------|
| ATOM | 657 | H3'  | DC | 21 | 8.629  | -2.586 | -7.896  | 1.00 | 0.00 |
| ATOM | 658 | C2'  | DC | 21 | 6.679  | -2.148 | -8.697  | 1.00 | 0.00 |
| ATOM | 659 | H2'  | DC | 21 | 7.241  | -1.344 | -9.172  | 1.00 | 0.00 |
| ATOM | 660 | H2'' | DC | 21 | 6.267  | -2.804 | -9.464  | 1.00 | 0.00 |
| ATOM | 661 | O3'  | DC | 21 | 7.545  | -4.324 | -8.143  | 1.00 | 0.00 |
| ATOM | 662 | P    | DG | 22 | 7.626  | -4.728 | -9.689  | 1.00 | 0.00 |
| ATOM | 663 | OP1  | DG | 22 | 8.164  | -3.592 | -10.471 | 1.00 | 0.00 |
| ATOM | 664 | OP2  | DG | 22 | 8.356  | -6.009 | -9.830  | 1.00 | 0.00 |
| ATOM | 665 | O5'  | DG | 22 | 6.081  | -4.945 | -10.042 | 1.00 | 0.00 |
| ATOM | 666 | C5'  | DG | 22 | 5.227  | -5.582 | -9.074  | 1.00 | 0.00 |
| ATOM | 667 | H5'  | DG | 22 | 4.810  | -4.829 | -8.405  | 1.00 | 0.00 |
| ATOM | 668 | H5'' | DG | 22 | 5.807  | -6.301 | -8.495  | 1.00 | 0.00 |
| ATOM | 669 | C4'  | DG | 22 | 4.095  | -6.306 | -9.777  | 1.00 | 0.00 |
| ATOM | 670 | H4'  | DG | 22 | 3.672  | -7.056 | -9.109  | 1.00 | 0.00 |
| ATOM | 671 | O4'  | DG | 22 | 3.006  | -5.367 | -10.007 | 1.00 | 0.00 |
| ATOM | 672 | C1'  | DG | 22 | 2.958  | -5.002 | -11.378 | 1.00 | 0.00 |
| ATOM | 673 | H1'  | DG | 22 | 1.989  | -5.276 | -11.796 | 1.00 | 0.00 |
| ATOM | 674 | N9   | DG | 22 | 2.969  | -3.515 | -11.460 | 1.00 | 0.00 |
| ATOM | 675 | C8   | DG | 22 | 4.042  | -2.650 | -11.446 | 1.00 | 0.00 |
| ATOM | 676 | H8   | DG | 22 | 5.047  | -3.037 | -11.365 | 1.00 | 0.00 |
| ATOM | 677 | N7   | DG | 22 | 3.708  | -1.385 | -11.535 | 1.00 | 0.00 |
| ATOM | 678 | C5   | DG | 22 | 2.317  | -1.414 | -11.614 | 1.00 | 0.00 |
| ATOM | 679 | C6   | DG | 22 | 1.386  | -0.349 | -11.727 | 1.00 | 0.00 |
| ATOM | 680 | O6   | DG | 22 | 1.600  | 0.858  | -11.783 | 1.00 | 0.00 |
| ATOM | 681 | N1   | DG | 22 | 0.068  | -0.825 | -11.777 | 1.00 | 0.00 |
| ATOM | 682 | H1   | DG | 22 | -0.663 | -0.148 | -11.858 | 1.00 | 0.00 |
| ATOM | 683 | C2   | DG | 22 | -0.301 | -2.155 | -11.724 | 1.00 | 0.00 |
| ATOM | 684 | N2   | DG | 22 | -1.612 | -2.402 | -11.787 | 1.00 | 0.00 |
| ATOM | 685 | H21  | DG | 22 | -2.356 | -1.722 | -11.857 | 1.00 | 0.00 |
| ATOM | 686 | H22  | DG | 22 | -1.891 | -3.372 | -11.740 | 1.00 | 0.00 |
| ATOM | 687 | N3   | DG | 22 | 0.573  | -3.153 | -11.618 | 1.00 | 0.00 |
| ATOM | 688 | C4   | DG | 22 | 1.856  | -2.709 | -11.569 | 1.00 | 0.00 |
| ATOM | 689 | C3'  | DG | 22 | 4.420  | -6.858 | -11.165 | 1.00 | 0.00 |
| ATOM | 690 | H3'  | DG | 22 | 5.460  | -7.164 | -11.276 | 1.00 | 0.00 |
| ATOM | 691 | C2'  | DG | 22 | 4.141  | -5.664 | -12.077 | 1.00 | 0.00 |
| ATOM | 692 | H2'  | DG | 22 | 5.069  | -5.344 | -12.552 | 1.00 | 0.00 |
| ATOM | 693 | H2'' | DG | 22 | 3.422  | -5.952 | -12.844 | 1.00 | 0.00 |
| ATOM | 694 | O3'  | DG | 22 | 3.562  | -7.933 | -11.523 | 1.00 | 0.00 |
| ATOM | 695 | P    | DC | 23 | 3.390  | -8.308 | -13.069 | 1.00 | 0.00 |
| ATOM | 696 | OP1  | DC | 23 | 4.493  | -7.705 | -13.851 | 1.00 | 0.00 |
| ATOM | 697 | OP2  | DC | 23 | 3.228  | -9.773 | -13.210 | 1.00 | 0.00 |
| ATOM | 698 | O5'  | DC | 23 | 2.013  | -7.575 | -13.422 | 1.00 | 0.00 |
| ATOM | 699 | C5'  | DC | 23 | 0.948  | -7.588 | -12.454 | 1.00 | 0.00 |
| ATOM | 700 | H5'  | DC | 23 | 1.053  | -6.734 | -11.785 | 1.00 | 0.00 |
| ATOM | 701 | H5'' | DC | 23 | 0.995  | -8.510 | -11.874 | 1.00 | 0.00 |
| ATOM | 702 | C4'  | DC | 23 | -0.394 | -7.509 | -13.157 | 1.00 | 0.00 |
| ATOM | 703 | H4'  | DC | 23 | -1.178 | -7.867 | -12.489 | 1.00 | 0.00 |
| ATOM | 704 | O4'  | DC | 23 | -0.723 | -6.108 | -13.387 | 1.00 | 0.00 |
| ATOM | 705 | C1'  | DC | 23 | -0.547 | -5.785 | -14.758 | 1.00 | 0.00 |
| ATOM | 706 | H1'  | DC | 23 | -1.492 | -5.436 | -15.175 | 1.00 | 0.00 |
| ATOM | 707 | N1   | DC | 23 | 0.336  | -4.589 | -14.840 | 1.00 | 0.00 |
| ATOM | 708 | C6   | DC | 23 | 1.690  | -4.713 | -14.811 | 1.00 | 0.00 |
| ATOM | 709 | H6   | DC | 23 | 2.140  | -5.691 | -14.728 | 1.00 | 0.00 |
| ATOM | 710 | C5   | DC | 23 | 2.495  | -3.623 | -14.885 | 1.00 | 0.00 |
| ATOM | 711 | H5   | DC | 23 | 3.578  | -3.743 | -14.860 | 1.00 | 0.00 |
| ATOM | 712 | C4   | DC | 23 | 1.852  | -2.348 | -14.995 | 1.00 | 0.00 |
| ATOM | 713 | N4   | DC | 23 | 2.575  | -1.242 | -15.072 | 1.00 | 0.00 |
| ATOM | 714 | H41  | DC | 23 | 2.083  | -0.364 | -15.148 | 1.00 | 0.00 |
| ATOM | 715 | H42  | DC | 23 | 3.584  | -1.291 | -15.054 | 1.00 | 0.00 |
| ATOM | 716 | N3   | DC | 23 | 0.517  | -2.237 | -15.023 | 1.00 | 0.00 |





## IRx

|      |    |      |     |   |        |        |        |      |      |
|------|----|------|-----|---|--------|--------|--------|------|------|
| ATOM | 1  | HO5' | DC5 | 1 | 20.065 | 35.850 | 23.346 | 1.00 | 0.00 |
| ATOM | 2  | O5'  | DC5 | 1 | 20.536 | 35.014 | 23.372 | 1.00 | 0.00 |
| ATOM | 3  | C5'  | DC5 | 1 | 19.834 | 33.837 | 23.766 | 1.00 | 0.00 |
| ATOM | 4  | H5'  | DC5 | 1 | 19.024 | 33.688 | 23.052 | 1.00 | 0.00 |
| ATOM | 5  | H5'' | DC5 | 1 | 19.418 | 33.953 | 24.767 | 1.00 | 0.00 |
| ATOM | 6  | C4'  | DC5 | 1 | 20.745 | 32.632 | 23.743 | 1.00 | 0.00 |
| ATOM | 7  | H4'  | DC5 | 1 | 21.590 | 32.835 | 24.401 | 1.00 | 0.00 |
| ATOM | 8  | O4'  | DC5 | 1 | 20.077 | 31.512 | 24.349 | 1.00 | 0.00 |
| ATOM | 9  | C1'  | DC5 | 1 | 20.037 | 30.405 | 23.469 | 1.00 | 0.00 |
| ATOM | 10 | H1'  | DC5 | 1 | 20.794 | 29.661 | 23.716 | 1.00 | 0.00 |
| ATOM | 11 | N1   | DC5 | 1 | 18.770 | 29.711 | 23.733 | 1.00 | 0.00 |
| ATOM | 12 | C6   | DC5 | 1 | 17.576 | 30.257 | 23.341 | 1.00 | 0.00 |
| ATOM | 13 | H6   | DC5 | 1 | 17.559 | 31.181 | 22.783 | 1.00 | 0.00 |
| ATOM | 14 | C5   | DC5 | 1 | 16.422 | 29.661 | 23.640 | 1.00 | 0.00 |
| ATOM | 15 | H5   | DC5 | 1 | 15.486 | 30.120 | 23.322 | 1.00 | 0.00 |
| ATOM | 16 | C4   | DC5 | 1 | 16.481 | 28.435 | 24.375 | 1.00 | 0.00 |
| ATOM | 17 | N4   | DC5 | 1 | 15.357 | 27.804 | 24.715 | 1.00 | 0.00 |
| ATOM | 18 | H41  | DC5 | 1 | 15.441 | 26.941 | 25.234 | 1.00 | 0.00 |
| ATOM | 19 | H42  | DC5 | 1 | 14.459 | 28.188 | 24.456 | 1.00 | 0.00 |
| ATOM | 20 | N3   | DC5 | 1 | 17.641 | 27.884 | 24.746 | 1.00 | 0.00 |
| ATOM | 21 | C2   | DC5 | 1 | 18.797 | 28.486 | 24.439 | 1.00 | 0.00 |
| ATOM | 22 | O2   | DC5 | 1 | 19.891 | 27.997 | 24.757 | 1.00 | 0.00 |
| ATOM | 23 | C3'  | DC5 | 1 | 21.181 | 32.151 | 22.364 | 1.00 | 0.00 |
| ATOM | 24 | H3'  | DC5 | 1 | 21.114 | 32.874 | 21.551 | 1.00 | 0.00 |
| ATOM | 25 | C2'  | DC5 | 1 | 20.250 | 30.983 | 22.081 | 1.00 | 0.00 |
| ATOM | 26 | H2'  | DC5 | 1 | 19.584 | 31.240 | 21.257 | 1.00 | 0.00 |
| ATOM | 27 | H2'' | DC5 | 1 | 20.838 | 30.106 | 21.812 | 1.00 | 0.00 |
| ATOM | 28 | O3'  | DC5 | 1 | 22.522 | 31.672 | 22.474 | 1.00 | 0.00 |
| ATOM | 29 | P    | DG  | 2 | 23.337 | 31.278 | 21.156 | 1.00 | 0.00 |
| ATOM | 30 | OP1  | DG  | 2 | 24.761 | 31.571 | 21.391 | 1.00 | 0.00 |
| ATOM | 31 | OP2  | DG  | 2 | 22.651 | 31.834 | 19.956 | 1.00 | 0.00 |
| ATOM | 32 | O5'  | DG  | 2 | 23.180 | 29.714 | 21.092 | 1.00 | 0.00 |
| ATOM | 33 | C5'  | DG  | 2 | 23.830 | 28.894 | 22.040 | 1.00 | 0.00 |
| ATOM | 34 | H5'  | DG  | 2 | 23.366 | 29.042 | 23.015 | 1.00 | 0.00 |
| ATOM | 35 | H5'' | DG  | 2 | 24.889 | 29.149 | 22.076 | 1.00 | 0.00 |
| ATOM | 36 | C4'  | DG  | 2 | 23.663 | 27.461 | 21.627 | 1.00 | 0.00 |
| ATOM | 37 | H4'  | DG  | 2 | 24.303 | 26.821 | 22.234 | 1.00 | 0.00 |
| ATOM | 38 | O4'  | DG  | 2 | 22.328 | 27.016 | 21.920 | 1.00 | 0.00 |
| ATOM | 39 | C1'  | DG  | 2 | 21.722 | 26.527 | 20.744 | 1.00 | 0.00 |
| ATOM | 40 | H1'  | DG  | 2 | 21.817 | 25.444 | 20.670 | 1.00 | 0.00 |
| ATOM | 41 | N9   | DG  | 2 | 20.293 | 26.737 | 20.884 | 1.00 | 0.00 |
| ATOM | 42 | C8   | DG  | 2 | 19.536 | 27.799 | 20.464 | 1.00 | 0.00 |
| ATOM | 43 | H8   | DG  | 2 | 19.981 | 28.624 | 19.927 | 1.00 | 0.00 |
| ATOM | 44 | N7   | DG  | 2 | 18.276 | 27.683 | 20.786 | 1.00 | 0.00 |
| ATOM | 45 | C5   | DG  | 2 | 18.201 | 26.464 | 21.447 | 1.00 | 0.00 |
| ATOM | 46 | C6   | DG  | 2 | 17.091 | 25.790 | 22.018 | 1.00 | 0.00 |
| ATOM | 47 | O6   | DG  | 2 | 15.916 | 26.151 | 22.052 | 1.00 | 0.00 |
| ATOM | 48 | N1   | DG  | 2 | 17.464 | 24.566 | 22.588 | 1.00 | 0.00 |
| ATOM | 49 | H1   | DG  | 2 | 16.750 | 24.013 | 23.016 | 1.00 | 0.00 |
| ATOM | 50 | C2   | DG  | 2 | 18.749 | 24.064 | 22.600 | 1.00 | 0.00 |
| ATOM | 51 | N2   | DG  | 2 | 18.930 | 22.867 | 23.187 | 1.00 | 0.00 |
| ATOM | 52 | H21  | DG  | 2 | 18.226 | 22.296 | 23.633 | 1.00 | 0.00 |
| ATOM | 53 | H22  | DG  | 2 | 19.874 | 22.509 | 23.200 | 1.00 | 0.00 |
| ATOM | 54 | N3   | DG  | 2 | 19.786 | 24.688 | 22.072 | 1.00 | 0.00 |
| ATOM | 55 | C4   | DG  | 2 | 19.440 | 25.872 | 21.516 | 1.00 | 0.00 |
| ATOM | 56 | C3'  | DG  | 2 | 23.866 | 27.232 | 20.130 | 1.00 | 0.00 |
| ATOM | 57 | H3'  | DG  | 2 | 24.463 | 27.923 | 19.535 | 1.00 | 0.00 |

|      |     |      |    |   |        |        |        |      |      |
|------|-----|------|----|---|--------|--------|--------|------|------|
| ATOM | 58  | C2'  | DG | 2 | 22.447 | 27.195 | 19.590 | 1.00 | 0.00 |
| ATOM | 59  | H2'  | DG | 2 | 22.240 | 28.118 | 19.049 | 1.00 | 0.00 |
| ATOM | 60  | H2'' | DG | 2 | 22.336 | 26.346 | 18.915 | 1.00 | 0.00 |
| ATOM | 61  | O3'  | DG | 2 | 24.412 | 25.926 | 20.055 | 1.00 | 0.00 |
| ATOM | 62  | P    | DC | 3 | 25.388 | 25.500 | 18.860 | 1.00 | 0.00 |
| ATOM | 63  | OP1  | DC | 3 | 26.783 | 25.808 | 19.232 | 1.00 | 0.00 |
| ATOM | 64  | OP2  | DC | 3 | 24.827 | 26.022 | 17.578 | 1.00 | 0.00 |
| ATOM | 65  | O5'  | DC | 3 | 25.215 | 23.915 | 18.859 | 1.00 | 0.00 |
| ATOM | 66  | C5'  | DC | 3 | 25.112 | 23.171 | 20.093 | 1.00 | 0.00 |
| ATOM | 67  | H5'  | DC | 3 | 24.973 | 23.878 | 20.910 | 1.00 | 0.00 |
| ATOM | 68  | H5'' | DC | 3 | 26.020 | 22.587 | 20.243 | 1.00 | 0.00 |
| ATOM | 69  | C4'  | DC | 3 | 23.925 | 22.238 | 20.036 | 1.00 | 0.00 |
| ATOM | 70  | H4'  | DC | 3 | 23.891 | 21.667 | 20.964 | 1.00 | 0.00 |
| ATOM | 71  | O4'  | DC | 3 | 22.721 | 23.004 | 20.043 | 1.00 | 0.00 |
| ATOM | 72  | C1'  | DC | 3 | 21.682 | 22.203 | 19.512 | 1.00 | 0.00 |
| ATOM | 73  | H1'  | DC | 3 | 21.149 | 21.647 | 20.283 | 1.00 | 0.00 |
| ATOM | 74  | N1   | DC | 3 | 20.674 | 23.119 | 18.988 | 1.00 | 0.00 |
| ATOM | 75  | C6   | DC | 3 | 21.030 | 24.206 | 18.236 | 1.00 | 0.00 |
| ATOM | 76  | H6   | DC | 3 | 22.062 | 24.350 | 17.950 | 1.00 | 0.00 |
| ATOM | 77  | C5   | DC | 3 | 20.113 | 25.107 | 17.842 | 1.00 | 0.00 |
| ATOM | 78  | H5   | DC | 3 | 20.422 | 25.973 | 17.256 | 1.00 | 0.00 |
| ATOM | 79  | C4   | DC | 3 | 18.758 | 24.869 | 18.228 | 1.00 | 0.00 |
| ATOM | 80  | N4   | DC | 3 | 17.792 | 25.737 | 17.891 | 1.00 | 0.00 |
| ATOM | 81  | H41  | DC | 3 | 16.849 | 25.527 | 18.186 | 1.00 | 0.00 |
| ATOM | 82  | H42  | DC | 3 | 18.016 | 26.567 | 17.361 | 1.00 | 0.00 |
| ATOM | 83  | N3   | DC | 3 | 18.408 | 23.794 | 18.929 | 1.00 | 0.00 |
| ATOM | 84  | C2   | DC | 3 | 19.340 | 22.896 | 19.319 | 1.00 | 0.00 |
| ATOM | 85  | O2   | DC | 3 | 19.041 | 21.875 | 19.970 | 1.00 | 0.00 |
| ATOM | 86  | C3'  | DC | 3 | 23.825 | 21.353 | 18.794 | 1.00 | 0.00 |
| ATOM | 87  | H3'  | DC | 3 | 24.257 | 21.739 | 17.871 | 1.00 | 0.00 |
| ATOM | 88  | C2'  | DC | 3 | 22.324 | 21.157 | 18.609 | 1.00 | 0.00 |
| ATOM | 89  | H2'  | DC | 3 | 22.119 | 20.866 | 17.579 | 1.00 | 0.00 |
| ATOM | 90  | H2'' | DC | 3 | 21.973 | 20.376 | 19.283 | 1.00 | 0.00 |
| ATOM | 91  | O3'  | DC | 3 | 24.468 | 20.110 | 19.126 | 1.00 | 0.00 |
| ATOM | 92  | P    | DG | 4 | 24.871 | 19.058 | 17.972 | 1.00 | 0.00 |
| ATOM | 93  | OP1  | DG | 4 | 25.843 | 18.117 | 18.628 | 1.00 | 0.00 |
| ATOM | 94  | OP2  | DG | 4 | 25.249 | 19.766 | 16.753 | 1.00 | 0.00 |
| ATOM | 95  | O5'  | DG | 4 | 23.511 | 18.294 | 17.681 | 1.00 | 0.00 |
| ATOM | 96  | C5'  | DG | 4 | 22.921 | 17.490 | 18.695 | 1.00 | 0.00 |
| ATOM | 97  | H5'  | DG | 4 | 22.775 | 18.104 | 19.584 | 1.00 | 0.00 |
| ATOM | 98  | H5'' | DG | 4 | 23.571 | 16.642 | 18.911 | 1.00 | 0.00 |
| ATOM | 99  | C4'  | DG | 4 | 21.588 | 16.998 | 18.210 | 1.00 | 0.00 |
| ATOM | 100 | H4'  | DG | 4 | 21.152 | 16.334 | 18.956 | 1.00 | 0.00 |
| ATOM | 101 | O4'  | DG | 4 | 20.659 | 18.097 | 18.117 | 1.00 | 0.00 |
| ATOM | 102 | C1'  | DG | 4 | 20.090 | 18.125 | 16.827 | 1.00 | 0.00 |
| ATOM | 103 | H1'  | DG | 4 | 19.120 | 17.631 | 16.880 | 1.00 | 0.00 |
| ATOM | 104 | N9   | DG | 4 | 19.757 | 19.506 | 16.488 | 1.00 | 0.00 |
| ATOM | 105 | C8   | DG | 4 | 20.562 | 20.452 | 15.892 | 1.00 | 0.00 |
| ATOM | 106 | H8   | DG | 4 | 21.591 | 20.231 | 15.648 | 1.00 | 0.00 |
| ATOM | 107 | N7   | DG | 4 | 19.949 | 21.585 | 15.677 | 1.00 | 0.00 |
| ATOM | 108 | C5   | DG | 4 | 18.660 | 21.378 | 16.171 | 1.00 | 0.00 |
| ATOM | 109 | C6   | DG | 4 | 17.528 | 22.248 | 16.212 | 1.00 | 0.00 |
| ATOM | 110 | O6   | DG | 4 | 17.430 | 23.415 | 15.808 | 1.00 | 0.00 |
| ATOM | 111 | N1   | DG | 4 | 16.428 | 21.622 | 16.800 | 1.00 | 0.00 |
| ATOM | 112 | H1   | DG | 4 | 15.582 | 22.150 | 16.874 | 1.00 | 0.00 |
| ATOM | 113 | C2   | DG | 4 | 16.415 | 20.343 | 17.280 | 1.00 | 0.00 |
| ATOM | 114 | N2   | DG | 4 | 15.257 | 19.917 | 17.806 | 1.00 | 0.00 |
| ATOM | 115 | H21  | DG | 4 | 14.400 | 20.444 | 17.895 | 1.00 | 0.00 |
| ATOM | 116 | H22  | DG | 4 | 15.246 | 18.975 | 18.170 | 1.00 | 0.00 |
| ATOM | 117 | N3   | DG | 4 | 17.456 | 19.526 | 17.250 | 1.00 | 0.00 |

|      |     |      |    |   |        |        |        |      |      |
|------|-----|------|----|---|--------|--------|--------|------|------|
| ATOM | 118 | C4   | DG | 4 | 18.534 | 20.105 | 16.684 | 1.00 | 0.00 |
| ATOM | 119 | C3'  | DG | 4 | 21.632 | 16.362 | 16.824 | 1.00 | 0.00 |
| ATOM | 120 | H3'  | DG | 4 | 22.573 | 15.984 | 16.425 | 1.00 | 0.00 |
| ATOM | 121 | C2'  | DG | 4 | 21.104 | 17.456 | 15.921 | 1.00 | 0.00 |
| ATOM | 122 | H2'  | DG | 4 | 21.922 | 17.864 | 15.327 | 1.00 | 0.00 |
| ATOM | 123 | H2'' | DG | 4 | 20.344 | 17.045 | 15.257 | 1.00 | 0.00 |
| ATOM | 124 | O3'  | DG | 4 | 20.678 | 15.319 | 16.883 | 1.00 | 0.00 |
| ATOM | 125 | P    | DA | 5 | 20.603 | 14.194 | 15.744 | 1.00 | 0.00 |
| ATOM | 126 | OP1  | DA | 5 | 21.230 | 12.959 | 16.281 | 1.00 | 0.00 |
| ATOM | 127 | OP2  | DA | 5 | 21.017 | 14.732 | 14.419 | 1.00 | 0.00 |
| ATOM | 128 | O5'  | DA | 5 | 19.039 | 13.951 | 15.692 | 1.00 | 0.00 |
| ATOM | 129 | C5'  | DA | 5 | 18.304 | 13.773 | 16.911 | 1.00 | 0.00 |
| ATOM | 130 | H5'  | DA | 5 | 18.748 | 14.464 | 17.627 | 1.00 | 0.00 |
| ATOM | 131 | H5'' | DA | 5 | 18.369 | 12.732 | 17.226 | 1.00 | 0.00 |
| ATOM | 132 | C4'  | DA | 5 | 16.855 | 14.135 | 16.705 | 1.00 | 0.00 |
| ATOM | 133 | H4'  | DA | 5 | 16.352 | 13.957 | 17.656 | 1.00 | 0.00 |
| ATOM | 134 | O4'  | DA | 5 | 16.695 | 15.558 | 16.470 | 1.00 | 0.00 |
| ATOM | 135 | C1'  | DA | 5 | 15.929 | 15.797 | 15.300 | 1.00 | 0.00 |
| ATOM | 136 | H1'  | DA | 5 | 14.886 | 16.053 | 15.488 | 1.00 | 0.00 |
| ATOM | 137 | N9   | DA | 5 | 16.461 | 17.015 | 14.676 | 1.00 | 0.00 |
| ATOM | 138 | C8   | DA | 5 | 17.734 | 17.239 | 14.207 | 1.00 | 0.00 |
| ATOM | 139 | H8   | DA | 5 | 18.461 | 16.440 | 14.219 | 1.00 | 0.00 |
| ATOM | 140 | N7   | DA | 5 | 17.918 | 18.439 | 13.718 | 1.00 | 0.00 |
| ATOM | 141 | C5   | DA | 5 | 16.683 | 19.056 | 13.875 | 1.00 | 0.00 |
| ATOM | 142 | C6   | DA | 5 | 16.223 | 20.352 | 13.555 | 1.00 | 0.00 |
| ATOM | 143 | N6   | DA | 5 | 16.984 | 21.297 | 12.994 | 1.00 | 0.00 |
| ATOM | 144 | H61  | DA | 5 | 16.593 | 22.206 | 12.790 | 1.00 | 0.00 |
| ATOM | 145 | H62  | DA | 5 | 17.950 | 21.102 | 12.774 | 1.00 | 0.00 |
| ATOM | 146 | N1   | DA | 5 | 14.933 | 20.644 | 13.839 | 1.00 | 0.00 |
| ATOM | 147 | C2   | DA | 5 | 14.171 | 19.699 | 14.406 | 1.00 | 0.00 |
| ATOM | 148 | H2   | DA | 5 | 13.139 | 19.913 | 14.641 | 1.00 | 0.00 |
| ATOM | 149 | N3   | DA | 5 | 14.489 | 18.449 | 14.756 | 1.00 | 0.00 |
| ATOM | 150 | C4   | DA | 5 | 15.775 | 18.188 | 14.459 | 1.00 | 0.00 |
| ATOM | 151 | C3'  | DA | 5 | 16.163 | 13.420 | 15.547 | 1.00 | 0.00 |
| ATOM | 152 | H3'  | DA | 5 | 16.707 | 12.569 | 15.136 | 1.00 | 0.00 |
| ATOM | 153 | C2'  | DA | 5 | 16.031 | 14.502 | 14.481 | 1.00 | 0.00 |
| ATOM | 154 | H2'  | DA | 5 | 16.587 | 14.206 | 13.592 | 1.00 | 0.00 |
| ATOM | 155 | H2'' | DA | 5 | 14.980 | 14.634 | 14.224 | 1.00 | 0.00 |
| ATOM | 156 | O3'  | DA | 5 | 14.904 | 12.934 | 16.032 | 1.00 | 0.00 |
| ATOM | 157 | P    | DA | 6 | 13.954 | 12.080 | 15.071 | 1.00 | 0.00 |
| ATOM | 158 | OP1  | DA | 6 | 13.092 | 11.246 | 15.953 | 1.00 | 0.00 |
| ATOM | 159 | OP2  | DA | 6 | 14.769 | 11.453 | 14.020 | 1.00 | 0.00 |
| ATOM | 160 | O5'  | DA | 6 | 13.056 | 13.202 | 14.406 | 1.00 | 0.00 |
| ATOM | 161 | C5'  | DA | 6 | 12.184 | 13.965 | 15.222 | 1.00 | 0.00 |
| ATOM | 162 | H5'  | DA | 6 | 12.848 | 14.589 | 15.821 | 1.00 | 0.00 |
| ATOM | 163 | H5'' | DA | 6 | 11.553 | 13.295 | 15.806 | 1.00 | 0.00 |
| ATOM | 164 | C4'  | DA | 6 | 11.308 | 14.846 | 14.376 | 1.00 | 0.00 |
| ATOM | 165 | H4'  | DA | 6 | 10.569 | 15.259 | 15.063 | 1.00 | 0.00 |
| ATOM | 166 | O4'  | DA | 6 | 12.033 | 15.991 | 13.896 | 1.00 | 0.00 |
| ATOM | 167 | C1'  | DA | 6 | 11.810 | 16.185 | 12.511 | 1.00 | 0.00 |
| ATOM | 168 | H1'  | DA | 6 | 11.068 | 16.946 | 12.267 | 1.00 | 0.00 |
| ATOM | 169 | N9   | DA | 6 | 13.051 | 16.742 | 11.953 | 1.00 | 0.00 |
| ATOM | 170 | C8   | DA | 6 | 14.253 | 16.097 | 11.802 | 1.00 | 0.00 |
| ATOM | 171 | H8   | DA | 6 | 14.340 | 15.047 | 12.039 | 1.00 | 0.00 |
| ATOM | 172 | N7   | DA | 6 | 15.197 | 16.853 | 11.305 | 1.00 | 0.00 |
| ATOM | 173 | C5   | DA | 6 | 14.585 | 18.084 | 11.106 | 1.00 | 0.00 |
| ATOM | 174 | C6   | DA | 6 | 15.066 | 19.322 | 10.605 | 1.00 | 0.00 |
| ATOM | 175 | N6   | DA | 6 | 16.329 | 19.520 | 10.209 | 1.00 | 0.00 |
| ATOM | 176 | H61  | DA | 6 | 16.613 | 20.425 | 9.861  | 1.00 | 0.00 |
| ATOM | 177 | H62  | DA | 6 | 16.998 | 18.765 | 10.258 | 1.00 | 0.00 |

|      |     |      |    |   |        |        |        |      |      |
|------|-----|------|----|---|--------|--------|--------|------|------|
| ATOM | 178 | N1   | DA | 6 | 14.198 | 20.357 | 10.535 | 1.00 | 0.00 |
| ATOM | 179 | C2   | DA | 6 | 12.938 | 20.162 | 10.946 | 1.00 | 0.00 |
| ATOM | 180 | H2   | DA | 6 | 12.223 | 20.970 | 10.899 | 1.00 | 0.00 |
| ATOM | 181 | N3   | DA | 6 | 12.370 | 19.048 | 11.444 | 1.00 | 0.00 |
| ATOM | 182 | C4   | DA | 6 | 13.259 | 18.034 | 11.497 | 1.00 | 0.00 |
| ATOM | 183 | C3'  | DA | 6 | 10.654 | 14.188 | 13.168 | 1.00 | 0.00 |
| ATOM | 184 | H3'  | DA | 6 | 10.746 | 13.103 | 13.115 | 1.00 | 0.00 |
| ATOM | 185 | C2'  | DA | 6 | 11.373 | 14.820 | 11.974 | 1.00 | 0.00 |
| ATOM | 186 | H2'  | DA | 6 | 11.868 | 14.041 | 11.394 | 1.00 | 0.00 |
| ATOM | 187 | H2'' | DA | 6 | 10.648 | 15.336 | 11.345 | 1.00 | 0.00 |
| ATOM | 188 | O3'  | DA | 6 | 9.262  | 14.480 | 13.256 | 1.00 | 0.00 |
| ATOM | 189 | P    | DT | 7 | 8.258  | 14.006 | 12.104 | 1.00 | 0.00 |
| ATOM | 190 | OP1  | DT | 7 | 6.947  | 13.813 | 12.710 | 1.00 | 0.00 |
| ATOM | 191 | OP2  | DT | 7 | 8.856  | 12.940 | 11.281 | 1.00 | 0.00 |
| ATOM | 192 | O5'  | DT | 7 | 8.163  | 15.293 | 11.202 | 1.00 | 0.00 |
| ATOM | 193 | C5'  | DT | 7 | 7.907  | 16.566 | 11.799 | 1.00 | 0.00 |
| ATOM | 194 | H5'  | DT | 7 | 8.682  | 16.703 | 12.554 | 1.00 | 0.00 |
| ATOM | 195 | H5'' | DT | 7 | 6.898  | 16.578 | 12.211 | 1.00 | 0.00 |
| ATOM | 196 | C4'  | DT | 7 | 8.037  | 17.644 | 10.754 | 1.00 | 0.00 |
| ATOM | 197 | H4'  | DT | 7 | 7.718  | 18.571 | 11.231 | 1.00 | 0.00 |
| ATOM | 198 | O4'  | DT | 7 | 9.413  | 17.875 | 10.402 | 1.00 | 0.00 |
| ATOM | 199 | C1'  | DT | 7 | 9.471  | 18.252 | 9.036  | 1.00 | 0.00 |
| ATOM | 200 | H1'  | DT | 7 | 9.341  | 19.320 | 8.861  | 1.00 | 0.00 |
| ATOM | 201 | N1   | DT | 7 | 10.850 | 18.009 | 8.588  | 1.00 | 0.00 |
| ATOM | 202 | C6   | DT | 7 | 11.414 | 16.754 | 8.659  | 1.00 | 0.00 |
| ATOM | 203 | H6   | DT | 7 | 10.779 | 15.936 | 8.967  | 1.00 | 0.00 |
| ATOM | 204 | C5   | DT | 7 | 12.689 | 16.491 | 8.322  | 1.00 | 0.00 |
| ATOM | 205 | C7   | DT | 7 | 13.292 | 15.128 | 8.424  | 1.00 | 0.00 |
| ATOM | 206 | H71  | DT | 7 | 12.736 | 14.436 | 7.791  | 1.00 | 0.00 |
| ATOM | 207 | H72  | DT | 7 | 14.331 | 15.164 | 8.096  | 1.00 | 0.00 |
| ATOM | 208 | H73  | DT | 7 | 13.249 | 14.788 | 9.459  | 1.00 | 0.00 |
| ATOM | 209 | C4   | DT | 7 | 13.507 | 17.588 | 7.844  | 1.00 | 0.00 |
| ATOM | 210 | O4   | DT | 7 | 14.687 | 17.499 | 7.508  | 1.00 | 0.00 |
| ATOM | 211 | N3   | DT | 7 | 12.874 | 18.803 | 7.780  | 1.00 | 0.00 |
| ATOM | 212 | H3   | DT | 7 | 13.483 | 19.629 | 7.412  | 1.00 | 0.00 |
| ATOM | 213 | C2   | DT | 7 | 11.576 | 19.096 | 8.122  | 1.00 | 0.00 |
| ATOM | 214 | O2   | DT | 7 | 11.113 | 20.233 | 8.017  | 1.00 | 0.00 |
| ATOM | 215 | C3'  | DT | 7 | 7.286  | 17.382 | 9.446  | 1.00 | 0.00 |
| ATOM | 216 | H3'  | DT | 7 | 6.817  | 16.399 | 9.418  | 1.00 | 0.00 |
| ATOM | 217 | C2'  | DT | 7 | 8.356  | 17.467 | 8.358  | 1.00 | 0.00 |
| ATOM | 218 | H2'  | DT | 7 | 8.293  | 16.588 | 7.717  | 1.00 | 0.00 |
| ATOM | 219 | H2'' | DT | 7 | 8.197  | 18.364 | 7.760  | 1.00 | 0.00 |
| ATOM | 220 | O3'  | DT | 7 | 6.228  | 18.341 | 9.347  | 1.00 | 0.00 |
| ATOM | 221 | P    | DT | 8 | 5.196  | 18.285 | 8.120  | 1.00 | 0.00 |
| ATOM | 222 | OP1  | DT | 8 | 3.928  | 18.831 | 8.653  | 1.00 | 0.00 |
| ATOM | 223 | OP2  | DT | 8 | 5.211  | 16.970 | 7.475  | 1.00 | 0.00 |
| ATOM | 224 | O5'  | DT | 8 | 5.818  | 19.323 | 7.094  | 1.00 | 0.00 |
| ATOM | 225 | C5'  | DT | 8 | 6.104  | 20.657 | 7.510  | 1.00 | 0.00 |
| ATOM | 226 | H5'  | DT | 8 | 6.690  | 20.549 | 8.423  | 1.00 | 0.00 |
| ATOM | 227 | H5'' | DT | 8 | 5.171  | 21.204 | 7.646  | 1.00 | 0.00 |
| ATOM | 228 | C4'  | DT | 8 | 6.937  | 21.347 | 6.466  | 1.00 | 0.00 |
| ATOM | 229 | H4'  | DT | 8 | 7.071  | 22.363 | 6.839  | 1.00 | 0.00 |
| ATOM | 230 | O4'  | DT | 8 | 8.271  | 20.815 | 6.382  | 1.00 | 0.00 |
| ATOM | 231 | C1'  | DT | 8 | 8.709  | 20.942 | 5.040  | 1.00 | 0.00 |
| ATOM | 232 | H1'  | DT | 8 | 9.188  | 21.896 | 4.818  | 1.00 | 0.00 |
| ATOM | 233 | N1   | DT | 8 | 9.786  | 19.985 | 4.858  | 1.00 | 0.00 |
| ATOM | 234 | C6   | DT | 8 | 9.556  | 18.638 | 5.074  | 1.00 | 0.00 |
| ATOM | 235 | H6   | DT | 8 | 8.544  | 18.329 | 5.290  | 1.00 | 0.00 |
| ATOM | 236 | C5   | DT | 8 | 10.502 | 17.708 | 4.979  | 1.00 | 0.00 |
| ATOM | 237 | C7   | DT | 8 | 10.230 | 16.254 | 5.214  | 1.00 | 0.00 |

|      |     |      |    |    |        |        |        |      |      |
|------|-----|------|----|----|--------|--------|--------|------|------|
| ATOM | 238 | H71  | DT | 8  | 9.482  | 15.904 | 4.503  | 1.00 | 0.00 |
| ATOM | 239 | H72  | DT | 8  | 11.150 | 15.686 | 5.081  | 1.00 | 0.00 |
| ATOM | 240 | H73  | DT | 8  | 9.860  | 16.113 | 6.229  | 1.00 | 0.00 |
| ATOM | 241 | C4   | DT | 8  | 11.852 | 18.139 | 4.631  | 1.00 | 0.00 |
| ATOM | 242 | O4   | DT | 8  | 12.819 | 17.406 | 4.547  | 1.00 | 0.00 |
| ATOM | 243 | N3   | DT | 8  | 12.003 | 19.496 | 4.402  | 1.00 | 0.00 |
| ATOM | 244 | H3   | DT | 8  | 13.001 | 19.831 | 4.120  | 1.00 | 0.00 |
| ATOM | 245 | C2   | DT | 8  | 11.028 | 20.464 | 4.498  | 1.00 | 0.00 |
| ATOM | 246 | O2   | DT | 8  | 11.253 | 21.654 | 4.285  | 1.00 | 0.00 |
| ATOM | 247 | C3'  | DT | 8  | 6.372  | 21.324 | 5.049  | 1.00 | 0.00 |
| ATOM | 248 | H3'  | DT | 8  | 5.455  | 20.746 | 4.934  | 1.00 | 0.00 |
| ATOM | 249 | C2'  | DT | 8  | 7.476  | 20.700 | 4.203  | 1.00 | 0.00 |
| ATOM | 250 | H2'  | DT | 8  | 7.076  | 19.848 | 3.653  | 1.00 | 0.00 |
| ATOM | 251 | H2'' | DT | 8  | 7.857  | 21.440 | 3.499  | 1.00 | 0.00 |
| ATOM | 252 | O3'  | DT | 8  | 6.060  | 22.664 | 4.718  | 1.00 | 0.00 |
| ATOM | 253 | P    | DC | 9  | 5.633  | 23.056 | 3.231  | 1.00 | 0.00 |
| ATOM | 254 | OP1  | DC | 9  | 4.777  | 24.264 | 3.372  | 1.00 | 0.00 |
| ATOM | 255 | OP2  | DC | 9  | 5.136  | 21.862 | 2.474  | 1.00 | 0.00 |
| ATOM | 256 | O5'  | DC | 9  | 7.010  | 23.523 | 2.599  | 1.00 | 0.00 |
| ATOM | 257 | C5'  | DC | 9  | 7.795  | 24.522 | 3.246  | 1.00 | 0.00 |
| ATOM | 258 | H5'  | DC | 9  | 8.172  | 24.079 | 4.168  | 1.00 | 0.00 |
| ATOM | 259 | H5'' | DC | 9  | 7.181  | 25.403 | 3.433  | 1.00 | 0.00 |
| ATOM | 260 | C4'  | DC | 9  | 8.959  | 24.903 | 2.367  | 1.00 | 0.00 |
| ATOM | 261 | H4'  | DC | 9  | 9.497  | 25.703 | 2.876  | 1.00 | 0.00 |
| ATOM | 262 | O4'  | DC | 9  | 9.908  | 23.818 | 2.295  | 1.00 | 0.00 |
| ATOM | 263 | C1'  | DC | 9  | 10.221 | 23.504 | 0.941  | 1.00 | 0.00 |
| ATOM | 264 | H1'  | DC | 9  | 11.156 | 23.950 | 0.602  | 1.00 | 0.00 |
| ATOM | 265 | N1   | DC | 9  | 10.496 | 22.063 | 0.918  | 1.00 | 0.00 |
| ATOM | 266 | C6   | DC | 9  | 9.509  | 21.162 | 1.213  | 1.00 | 0.00 |
| ATOM | 267 | H6   | DC | 9  | 8.499  | 21.505 | 1.385  | 1.00 | 0.00 |
| ATOM | 268 | C5   | DC | 9  | 9.772  | 19.854 | 1.293  | 1.00 | 0.00 |
| ATOM | 269 | H5   | DC | 9  | 8.969  | 19.156 | 1.530  | 1.00 | 0.00 |
| ATOM | 270 | C4   | DC | 9  | 11.121 | 19.442 | 1.060  | 1.00 | 0.00 |
| ATOM | 271 | N4   | DC | 9  | 11.460 | 18.160 | 1.153  | 1.00 | 0.00 |
| ATOM | 272 | H41  | DC | 9  | 12.425 | 17.916 | 0.980  | 1.00 | 0.00 |
| ATOM | 273 | H42  | DC | 9  | 10.766 | 17.466 | 1.389  | 1.00 | 0.00 |
| ATOM | 274 | N3   | DC | 9  | 12.084 | 20.311 | 0.747  | 1.00 | 0.00 |
| ATOM | 275 | C2   | DC | 9  | 11.807 | 21.621 | 0.655  | 1.00 | 0.00 |
| ATOM | 276 | O2   | DC | 9  | 12.681 | 22.438 | 0.347  | 1.00 | 0.00 |
| ATOM | 277 | C3'  | DC | 9  | 8.616  | 25.264 | 0.922  | 1.00 | 0.00 |
| ATOM | 278 | H3'  | DC | 9  | 7.576  | 25.493 | 0.690  | 1.00 | 0.00 |
| ATOM | 279 | C2'  | DC | 9  | 9.062  | 24.042 | 0.116  | 1.00 | 0.00 |
| ATOM | 280 | H2'  | DC | 9  | 8.190  | 23.562 | -0.329 | 1.00 | 0.00 |
| ATOM | 281 | H2'' | DC | 9  | 9.745  | 24.356 | -0.673 | 1.00 | 0.00 |
| ATOM | 282 | O3'  | DC | 9  | 9.415  | 26.393 | 0.613  | 1.00 | 0.00 |
| ATOM | 283 | P    | DG | 10 | 8.967  | 27.410 | -0.543 | 1.00 | 0.00 |
| ATOM | 284 | OP1  | DG | 10 | 9.539  | 28.712 | -0.121 | 1.00 | 0.00 |
| ATOM | 285 | OP2  | DG | 10 | 7.537  | 27.286 | -0.852 | 1.00 | 0.00 |
| ATOM | 286 | O5'  | DG | 10 | 9.789  | 26.881 | -1.789 | 1.00 | 0.00 |
| ATOM | 287 | C5'  | DG | 10 | 11.213 | 26.858 | -1.731 | 1.00 | 0.00 |
| ATOM | 288 | H5'  | DG | 10 | 11.507 | 26.461 | -0.760 | 1.00 | 0.00 |
| ATOM | 289 | H5'' | DG | 10 | 11.599 | 27.867 | -1.872 | 1.00 | 0.00 |
| ATOM | 290 | C4'  | DG | 10 | 11.749 | 25.962 | -2.815 | 1.00 | 0.00 |
| ATOM | 291 | H4'  | DG | 10 | 12.818 | 26.131 | -2.940 | 1.00 | 0.00 |
| ATOM | 292 | O4'  | DG | 10 | 11.646 | 24.576 | -2.415 | 1.00 | 0.00 |
| ATOM | 293 | C1'  | DG | 10 | 11.122 | 23.882 | -3.532 | 1.00 | 0.00 |
| ATOM | 294 | H1'  | DG | 10 | 11.952 | 23.649 | -4.199 | 1.00 | 0.00 |
| ATOM | 295 | N9   | DG | 10 | 10.650 | 22.581 | -3.105 | 1.00 | 0.00 |
| ATOM | 296 | C8   | DG | 10 | 9.376  | 22.181 | -2.794 | 1.00 | 0.00 |
| ATOM | 297 | H8   | DG | 10 | 8.551  | 22.877 | -2.814 | 1.00 | 0.00 |

|      |     |      |     |    |        |        |         |      |      |
|------|-----|------|-----|----|--------|--------|---------|------|------|
| ATOM | 298 | N7   | DG  | 10 | 9.304  | 20.915 | -2.486  | 1.00 | 0.00 |
| ATOM | 299 | C5   | DG  | 10 | 10.614 | 20.467 | -2.594  | 1.00 | 0.00 |
| ATOM | 300 | C6   | DG  | 10 | 11.169 | 19.186 | -2.384  | 1.00 | 0.00 |
| ATOM | 301 | O6   | DG  | 10 | 10.595 | 18.146 | -2.033  | 1.00 | 0.00 |
| ATOM | 302 | N1   | DG  | 10 | 12.547 | 19.181 | -2.617  | 1.00 | 0.00 |
| ATOM | 303 | H1   | DG  | 10 | 13.030 | 18.313 | -2.503  | 1.00 | 0.00 |
| ATOM | 304 | C2   | DG  | 10 | 13.287 | 20.270 | -2.997  | 1.00 | 0.00 |
| ATOM | 305 | N2   | DG  | 10 | 14.610 | 20.066 | -3.194  | 1.00 | 0.00 |
| ATOM | 306 | H21  | DG  | 10 | 15.115 | 19.199 | -3.080  | 1.00 | 0.00 |
| ATOM | 307 | H22  | DG  | 10 | 15.155 | 20.872 | -3.466  | 1.00 | 0.00 |
| ATOM | 308 | N3   | DG  | 10 | 12.777 | 21.470 | -3.181  | 1.00 | 0.00 |
| ATOM | 309 | C4   | DG  | 10 | 11.448 | 21.491 | -2.969  | 1.00 | 0.00 |
| ATOM | 310 | C3'  | DG  | 10 | 10.983 | 26.088 | -4.139  | 1.00 | 0.00 |
| ATOM | 311 | H3'  | DG  | 10 | 10.341 | 26.960 | -4.265  | 1.00 | 0.00 |
| ATOM | 312 | C2'  | DG  | 10 | 10.136 | 24.826 | -4.176  | 1.00 | 0.00 |
| ATOM | 313 | H2'  | DG  | 10 | 9.088  | 25.086 | -4.026  | 1.00 | 0.00 |
| ATOM | 314 | H2'' | DG  | 10 | 10.253 | 24.337 | -5.143  | 1.00 | 0.00 |
| ATOM | 315 | O3'  | DG  | 10 | 11.919 | 25.972 | -5.215  | 1.00 | 0.00 |
| ATOM | 316 | P    | DC  | 11 | 12.458 | 27.280 | -5.963  | 1.00 | 0.00 |
| ATOM | 317 | OP1  | DC  | 11 | 12.480 | 28.409 | -5.000  | 1.00 | 0.00 |
| ATOM | 318 | OP2  | DC  | 11 | 11.647 | 27.383 | -7.200  | 1.00 | 0.00 |
| ATOM | 319 | O5'  | DC  | 11 | 13.948 | 26.855 | -6.327  | 1.00 | 0.00 |
| ATOM | 320 | C5'  | DC  | 11 | 14.960 | 26.774 | -5.311  | 1.00 | 0.00 |
| ATOM | 321 | H5'  | DC  | 11 | 14.422 | 26.568 | -4.386  | 1.00 | 0.00 |
| ATOM | 322 | H5'' | DC  | 11 | 15.525 | 27.706 | -5.285  | 1.00 | 0.00 |
| ATOM | 323 | C4'  | DC  | 11 | 15.910 | 25.631 | -5.600  | 1.00 | 0.00 |
| ATOM | 324 | H4'  | DC  | 11 | 16.667 | 25.700 | -4.818  | 1.00 | 0.00 |
| ATOM | 325 | O4'  | DC  | 11 | 15.282 | 24.346 | -5.384  | 1.00 | 0.00 |
| ATOM | 326 | C1'  | DC  | 11 | 15.425 | 23.519 | -6.536  | 1.00 | 0.00 |
| ATOM | 327 | H1'  | DC  | 11 | 16.243 | 22.803 | -6.450  | 1.00 | 0.00 |
| ATOM | 328 | N1   | DC  | 11 | 14.230 | 22.675 | -6.585  | 1.00 | 0.00 |
| ATOM | 329 | C6   | DC  | 11 | 12.987 | 23.225 | -6.763  | 1.00 | 0.00 |
| ATOM | 330 | H6   | DC  | 11 | 12.892 | 24.280 | -6.974  | 1.00 | 0.00 |
| ATOM | 331 | C5   | DC  | 11 | 11.877 | 22.475 | -6.680  | 1.00 | 0.00 |
| ATOM | 332 | H5   | DC  | 11 | 10.899 | 22.940 | -6.803  | 1.00 | 0.00 |
| ATOM | 333 | C4   | DC  | 11 | 12.050 | 21.085 | -6.421  | 1.00 | 0.00 |
| ATOM | 334 | N4   | DC  | 11 | 10.985 | 20.286 | -6.287  | 1.00 | 0.00 |
| ATOM | 335 | H41  | DC  | 11 | 11.153 | 19.307 | -6.104  | 1.00 | 0.00 |
| ATOM | 336 | H42  | DC  | 11 | 10.052 | 20.664 | -6.369  | 1.00 | 0.00 |
| ATOM | 337 | N3   | DC  | 11 | 13.262 | 20.537 | -6.296  | 1.00 | 0.00 |
| ATOM | 338 | C2   | DC  | 11 | 14.371 | 21.300 | -6.377  | 1.00 | 0.00 |
| ATOM | 339 | O2   | DC  | 11 | 15.509 | 20.815 | -6.267  | 1.00 | 0.00 |
| ATOM | 340 | C3'  | DC  | 11 | 16.519 | 25.558 | -7.001  | 1.00 | 0.00 |
| ATOM | 341 | H3'  | DC  | 11 | 16.545 | 26.446 | -7.633  | 1.00 | 0.00 |
| ATOM | 342 | C2'  | DC  | 11 | 15.691 | 24.475 | -7.681  | 1.00 | 0.00 |
| ATOM | 343 | H2'  | DC  | 11 | 15.019 | 24.933 | -8.407  | 1.00 | 0.00 |
| ATOM | 344 | H2'' | DC  | 11 | 16.354 | 23.776 | -8.191  | 1.00 | 0.00 |
| ATOM | 345 | O3'  | DC  | 11 | 17.857 | 25.082 | -6.787  | 1.00 | 0.00 |
| ATOM | 346 | P    | DG3 | 12 | 18.981 | 25.204 | -7.937  | 1.00 | 0.00 |
| ATOM | 347 | OP1  | DG3 | 12 | 20.100 | 25.982 | -7.344  | 1.00 | 0.00 |
| ATOM | 348 | OP2  | DG3 | 12 | 18.351 | 25.655 | -9.207  | 1.00 | 0.00 |
| ATOM | 349 | O5'  | DG3 | 12 | 19.535 | 23.719 | -8.107  | 1.00 | 0.00 |
| ATOM | 350 | C5'  | DG3 | 12 | 18.670 | 22.624 | -8.342  | 1.00 | 0.00 |
| ATOM | 351 | H5'  | DG3 | 12 | 17.745 | 22.975 | -8.799  | 1.00 | 0.00 |
| ATOM | 352 | H5'' | DG3 | 12 | 18.444 | 22.130 | -7.397  | 1.00 | 0.00 |
| ATOM | 353 | C4'  | DG3 | 12 | 19.343 | 21.650 | -9.272  | 1.00 | 0.00 |
| ATOM | 354 | H4'  | DG3 | 12 | 20.246 | 21.223 | -8.836  | 1.00 | 0.00 |
| ATOM | 355 | O4'  | DG3 | 12 | 18.456 | 20.535 | -9.424  | 1.00 | 0.00 |
| ATOM | 356 | C1'  | DG3 | 12 | 17.792 | 20.587 | -10.665 | 1.00 | 0.00 |
| ATOM | 357 | H1'  | DG3 | 12 | 17.887 | 19.636 | -11.189 | 1.00 | 0.00 |

|      |     |      |     |    |        |        |         |      |      |
|------|-----|------|-----|----|--------|--------|---------|------|------|
| ATOM | 358 | N9   | DG3 | 12 | 16.369 | 20.677 | -10.371 | 1.00 | 0.00 |
| ATOM | 359 | C8   | DG3 | 12 | 15.562 | 21.794 | -10.380 | 1.00 | 0.00 |
| ATOM | 360 | H8   | DG3 | 12 | 15.954 | 22.770 | -10.626 | 1.00 | 0.00 |
| ATOM | 361 | N7   | DG3 | 12 | 14.325 | 21.522 | -10.064 | 1.00 | 0.00 |
| ATOM | 362 | C5   | DG3 | 12 | 14.318 | 20.152 | -9.840  | 1.00 | 0.00 |
| ATOM | 363 | C6   | DG3 | 12 | 13.255 | 19.273 | -9.485  | 1.00 | 0.00 |
| ATOM | 364 | O6   | DG3 | 12 | 12.054 | 19.541 | -9.299  | 1.00 | 0.00 |
| ATOM | 365 | N1   | DG3 | 12 | 13.702 | 17.954 | -9.357  | 1.00 | 0.00 |
| ATOM | 366 | H1   | DG3 | 12 | 13.025 | 17.262 | -9.107  | 1.00 | 0.00 |
| ATOM | 367 | C2   | DG3 | 12 | 14.998 | 17.531 | -9.553  | 1.00 | 0.00 |
| ATOM | 368 | N2   | DG3 | 12 | 15.232 | 16.222 | -9.394  | 1.00 | 0.00 |
| ATOM | 369 | H21  | DG3 | 12 | 14.562 | 15.512 | -9.134  | 1.00 | 0.00 |
| ATOM | 370 | H22  | DG3 | 12 | 16.184 | 15.914 | -9.529  | 1.00 | 0.00 |
| ATOM | 371 | N3   | DG3 | 12 | 15.991 | 18.340 | -9.887  | 1.00 | 0.00 |
| ATOM | 372 | C4   | DG3 | 12 | 15.578 | 19.623 | -10.017 | 1.00 | 0.00 |
| ATOM | 373 | C3'  | DG3 | 12 | 19.585 | 22.202 | -10.677 | 1.00 | 0.00 |
| ATOM | 374 | H3'  | DG3 | 12 | 19.661 | 23.289 | -10.687 | 1.00 | 0.00 |
| ATOM | 375 | C2'  | DG3 | 12 | 18.346 | 21.775 | -11.441 | 1.00 | 0.00 |
| ATOM | 376 | H2'  | DG3 | 12 | 17.915 | 22.639 | -11.947 | 1.00 | 0.00 |
| ATOM | 377 | H2'' | DG3 | 12 | 18.616 | 21.019 | -12.179 | 1.00 | 0.00 |
| ATOM | 378 | O3'  | DG3 | 12 | 20.769 | 21.656 | -11.256 | 1.00 | 0.00 |
| ATOM | 379 | HO3' | DG3 | 12 | 20.969 | 21.970 | -12.141 | 1.00 | 0.00 |
| TER  |     |      |     |    |        |        |         |      |      |
| ATOM | 380 | HO5' | DC5 | 13 | 6.908  | 11.359 | -9.132  | 1.00 | 0.00 |
| ATOM | 381 | O5'  | DC5 | 13 | 7.852  | 11.318 | -8.962  | 1.00 | 0.00 |
| ATOM | 382 | C5'  | DC5 | 13 | 8.663  | 10.453 | -9.760  | 1.00 | 0.00 |
| ATOM | 383 | H5'  | DC5 | 13 | 8.553  | 10.813 | -10.783 | 1.00 | 0.00 |
| ATOM | 384 | H5'' | DC5 | 13 | 8.308  | 9.424  | -9.697  | 1.00 | 0.00 |
| ATOM | 385 | C4'  | DC5 | 13 | 10.124 | 10.500 | -9.371  | 1.00 | 0.00 |
| ATOM | 386 | H4'  | DC5 | 13 | 10.663 | 9.877  | -10.086 | 1.00 | 0.00 |
| ATOM | 387 | O4'  | DC5 | 13 | 10.667 | 11.825 | -9.564  | 1.00 | 0.00 |
| ATOM | 388 | C1'  | DC5 | 13 | 11.265 | 12.323 | -8.375  | 1.00 | 0.00 |
| ATOM | 389 | H1'  | DC5 | 13 | 12.353 | 12.327 | -8.442  | 1.00 | 0.00 |
| ATOM | 390 | N1   | DC5 | 13 | 10.916 | 13.750 | -8.299  | 1.00 | 0.00 |
| ATOM | 391 | C6   | DC5 | 13 | 9.632  | 14.137 | -8.014  | 1.00 | 0.00 |
| ATOM | 392 | H6   | DC5 | 13 | 8.880  | 13.393 | -7.798  | 1.00 | 0.00 |
| ATOM | 393 | C5   | DC5 | 13 | 9.288  | 15.432 | -7.998  | 1.00 | 0.00 |
| ATOM | 394 | H5   | DC5 | 13 | 8.256  | 15.705 | -7.776  | 1.00 | 0.00 |
| ATOM | 395 | C4   | DC5 | 13 | 10.308 | 16.395 | -8.276  | 1.00 | 0.00 |
| ATOM | 396 | N4   | DC5 | 13 | 10.020 | 17.697 | -8.277  | 1.00 | 0.00 |
| ATOM | 397 | H41  | DC5 | 13 | 10.769 | 18.343 | -8.478  | 1.00 | 0.00 |
| ATOM | 398 | H42  | DC5 | 13 | 9.080  | 18.011 | -8.081  | 1.00 | 0.00 |
| ATOM | 399 | N3   | DC5 | 13 | 11.569 | 16.036 | -8.541  | 1.00 | 0.00 |
| ATOM | 400 | C2   | DC5 | 13 | 11.914 | 14.726 | -8.562  | 1.00 | 0.00 |
| ATOM | 401 | O2   | DC5 | 13 | 13.081 | 14.362 | -8.808  | 1.00 | 0.00 |
| ATOM | 402 | C3'  | DC5 | 13 | 10.437 | 10.130 | -7.925  | 1.00 | 0.00 |
| ATOM | 403 | H3'  | DC5 | 13 | 9.646  | 9.607  | -7.388  | 1.00 | 0.00 |
| ATOM | 404 | C2'  | DC5 | 13 | 10.712 | 11.467 | -7.249  | 1.00 | 0.00 |
| ATOM | 405 | H2'  | DC5 | 13 | 9.971  | 11.640 | -6.469  | 1.00 | 0.00 |
| ATOM | 406 | H2'' | DC5 | 13 | 11.708 | 11.453 | -6.806  | 1.00 | 0.00 |
| ATOM | 407 | O3'  | DC5 | 13 | 11.600 | 9.312  | -7.938  | 1.00 | 0.00 |
| ATOM | 408 | P    | DG  | 14 | 12.053 | 8.530  | -6.610  | 1.00 | 0.00 |
| ATOM | 409 | OP1  | DG  | 14 | 12.539 | 7.185  | -7.042  | 1.00 | 0.00 |
| ATOM | 410 | OP2  | DG  | 14 | 11.009 | 8.640  | -5.563  | 1.00 | 0.00 |
| ATOM | 411 | O5'  | DG  | 14 | 13.291 | 9.394  | -6.120  | 1.00 | 0.00 |
| ATOM | 412 | C5'  | DG  | 14 | 14.408 | 9.581  | -6.976  | 1.00 | 0.00 |
| ATOM | 413 | H5'  | DG  | 14 | 14.002 | 9.890  | -7.939  | 1.00 | 0.00 |
| ATOM | 414 | H5'' | DG  | 14 | 14.982 | 8.656  | -7.032  | 1.00 | 0.00 |
| ATOM | 415 | C4'  | DG  | 14 | 15.279 | 10.678 | -6.433  | 1.00 | 0.00 |
| ATOM | 416 | H4'  | DG  | 14 | 16.171 | 10.712 | -7.058  | 1.00 | 0.00 |



|      |     |      |    |    |        |        |        |      |      |
|------|-----|------|----|----|--------|--------|--------|------|------|
| ATOM | 417 | O4'  | DG | 14 | 14.675 | 11.972 | -6.596 | 1.00 | 0.00 |
| ATOM | 418 | C1'  | DG | 14 | 14.985 | 12.780 | -5.476 | 1.00 | 0.00 |
| ATOM | 419 | H1'  | DG | 14 | 15.862 | 13.391 | -5.689 | 1.00 | 0.00 |
| ATOM | 420 | N9   | DG | 14 | 13.910 | 13.758 | -5.331 | 1.00 | 0.00 |
| ATOM | 421 | C8   | DG | 14 | 12.619 | 13.498 | -4.942 | 1.00 | 0.00 |
| ATOM | 422 | H8   | DG | 14 | 12.303 | 12.492 | -4.707 | 1.00 | 0.00 |
| ATOM | 423 | N7   | DG | 14 | 11.872 | 14.566 | -4.900 | 1.00 | 0.00 |
| ATOM | 424 | C5   | DG | 14 | 12.719 | 15.599 | -5.289 | 1.00 | 0.00 |
| ATOM | 425 | C6   | DG | 14 | 12.464 | 16.981 | -5.424 | 1.00 | 0.00 |
| ATOM | 426 | O6   | DG | 14 | 11.396 | 17.585 | -5.243 | 1.00 | 0.00 |
| ATOM | 427 | N1   | DG | 14 | 13.603 | 17.679 | -5.816 | 1.00 | 0.00 |
| ATOM | 428 | H1   | DG | 14 | 13.522 | 18.670 | -5.922 | 1.00 | 0.00 |
| ATOM | 429 | C2   | DG | 14 | 14.831 | 17.116 | -6.061 | 1.00 | 0.00 |
| ATOM | 430 | N2   | DG | 14 | 15.805 | 17.968 | -6.419 | 1.00 | 0.00 |
| ATOM | 431 | H21  | DG | 14 | 15.725 | 18.968 | -6.536 | 1.00 | 0.00 |
| ATOM | 432 | H22  | DG | 14 | 16.710 | 17.563 | -6.610 | 1.00 | 0.00 |
| ATOM | 433 | N3   | DG | 14 | 15.078 | 15.810 | -5.952 | 1.00 | 0.00 |
| ATOM | 434 | C4   | DG | 14 | 13.983 | 15.121 | -5.558 | 1.00 | 0.00 |
| ATOM | 435 | C3'  | DG | 14 | 15.622 | 10.535 | -4.958 | 1.00 | 0.00 |
| ATOM | 436 | H3'  | DG | 14 | 15.161 | 9.667  | -4.486 | 1.00 | 0.00 |
| ATOM | 437 | C2'  | DG | 14 | 15.088 | 11.811 | -4.309 | 1.00 | 0.00 |
| ATOM | 438 | H2'  | DG | 14 | 14.454 | 11.550 | -3.461 | 1.00 | 0.00 |
| ATOM | 439 | H2'' | DG | 14 | 15.923 | 12.421 | -3.964 | 1.00 | 0.00 |
| ATOM | 440 | O3'  | DG | 14 | 17.026 | 10.331 | -4.877 | 1.00 | 0.00 |
| ATOM | 441 | P    | DC | 15 | 17.740 | 10.184 | -3.461 | 1.00 | 0.00 |
| ATOM | 442 | OP1  | DC | 15 | 18.945 | 9.344  | -3.662 | 1.00 | 0.00 |
| ATOM | 443 | OP2  | DC | 15 | 16.733 | 9.806  | -2.445 | 1.00 | 0.00 |
| ATOM | 444 | O5'  | DC | 15 | 18.221 | 11.665 | -3.148 | 1.00 | 0.00 |
| ATOM | 445 | C5'  | DC | 15 | 19.064 | 12.358 | -4.048 | 1.00 | 0.00 |
| ATOM | 446 | H5'  | DC | 15 | 18.757 | 12.154 | -5.074 | 1.00 | 0.00 |
| ATOM | 447 | H5'' | DC | 15 | 20.094 | 12.028 | -3.910 | 1.00 | 0.00 |
| ATOM | 448 | C4'  | DC | 15 | 18.977 | 13.840 | -3.790 | 1.00 | 0.00 |
| ATOM | 449 | H4'  | DC | 15 | 19.551 | 14.375 | -4.547 | 1.00 | 0.00 |
| ATOM | 450 | O4'  | DC | 15 | 17.626 | 14.297 | -3.972 | 1.00 | 0.00 |
| ATOM | 451 | C1'  | DC | 15 | 17.454 | 15.513 | -3.235 | 1.00 | 0.00 |
| ATOM | 452 | H1'  | DC | 15 | 17.458 | 16.377 | -3.900 | 1.00 | 0.00 |
| ATOM | 453 | N1   | DC | 15 | 16.092 | 15.513 | -2.673 | 1.00 | 0.00 |
| ATOM | 454 | C6   | DC | 15 | 15.540 | 14.379 | -2.131 | 1.00 | 0.00 |
| ATOM | 455 | H6   | DC | 15 | 16.122 | 13.472 | -2.065 | 1.00 | 0.00 |
| ATOM | 456 | C5   | DC | 15 | 14.276 | 14.376 | -1.676 | 1.00 | 0.00 |
| ATOM | 457 | H5   | DC | 15 | 13.854 | 13.463 | -1.255 | 1.00 | 0.00 |
| ATOM | 458 | C4   | DC | 15 | 13.548 | 15.600 | -1.770 | 1.00 | 0.00 |
| ATOM | 459 | N4   | DC | 15 | 12.297 | 15.671 | -1.334 | 1.00 | 0.00 |
| ATOM | 460 | H41  | DC | 15 | 11.819 | 16.557 | -1.420 | 1.00 | 0.00 |
| ATOM | 461 | H42  | DC | 15 | 11.851 | 14.859 | -0.932 | 1.00 | 0.00 |
| ATOM | 462 | N3   | DC | 15 | 14.087 | 16.704 | -2.286 | 1.00 | 0.00 |
| ATOM | 463 | C2   | DC | 15 | 15.359 | 16.690 | -2.735 | 1.00 | 0.00 |
| ATOM | 464 | O2   | DC | 15 | 15.900 | 17.704 | -3.201 | 1.00 | 0.00 |
| ATOM | 465 | C3'  | DC | 15 | 19.317 | 14.264 | -2.371 | 1.00 | 0.00 |
| ATOM | 466 | H3'  | DC | 15 | 18.959 | 13.610 | -1.576 | 1.00 | 0.00 |
| ATOM | 467 | C2'  | DC | 15 | 18.628 | 15.623 | -2.261 | 1.00 | 0.00 |
| ATOM | 468 | H2'  | DC | 15 | 18.732 | 16.002 | -1.244 | 1.00 | 0.00 |
| ATOM | 469 | H2'' | DC | 15 | 19.090 | 16.322 | -2.958 | 1.00 | 0.00 |
| ATOM | 470 | O3'  | DC | 15 | 20.738 | 14.345 | -2.263 | 1.00 | 0.00 |
| ATOM | 471 | P    | DG | 16 | 21.424 | 14.639 | -0.847 | 1.00 | 0.00 |
| ATOM | 472 | OP1  | DG | 16 | 22.828 | 14.175 | -0.955 | 1.00 | 0.00 |
| ATOM | 473 | OP2  | DG | 16 | 20.542 | 14.103 | 0.234  | 1.00 | 0.00 |
| ATOM | 474 | O5'  | DG | 16 | 21.402 | 16.219 | -0.718 | 1.00 | 0.00 |
| ATOM | 475 | C5'  | DG | 16 | 22.084 | 17.056 | -1.638 | 1.00 | 0.00 |
| ATOM | 476 | H5'  | DG | 16 | 21.730 | 16.833 | -2.645 | 1.00 | 0.00 |

|      |     |        |    |    |        |        |        |      |      |
|------|-----|--------|----|----|--------|--------|--------|------|------|
| ATOM | 477 | H5 ' ' | DG | 16 | 23.157 | 16.881 | -1.563 | 1.00 | 0.00 |
| ATOM | 478 | C4'    | DG | 16 | 21.783 | 18.499 | -1.315 | 1.00 | 0.00 |
| ATOM | 479 | H4'    | DG | 16 | 22.158 | 19.148 | -2.106 | 1.00 | 0.00 |
| ATOM | 480 | O4'    | DG | 16 | 20.342 | 18.696 | -1.335 | 1.00 | 0.00 |
| ATOM | 481 | C1'    | DG | 16 | 19.885 | 19.133 | -0.048 | 1.00 | 0.00 |
| ATOM | 482 | H1'    | DG | 16 | 19.575 | 20.174 | -0.140 | 1.00 | 0.00 |
| ATOM | 483 | N9     | DG | 16 | 18.643 | 18.429 | 0.279  | 1.00 | 0.00 |
| ATOM | 484 | C8     | DG | 16 | 18.497 | 17.151 | 0.767  | 1.00 | 0.00 |
| ATOM | 485 | H8     | DG | 16 | 19.356 | 16.515 | 0.924  | 1.00 | 0.00 |
| ATOM | 486 | N7     | DG | 16 | 17.251 | 16.831 | 0.999  | 1.00 | 0.00 |
| ATOM | 487 | C5     | DG | 16 | 16.532 | 17.963 | 0.638  | 1.00 | 0.00 |
| ATOM | 488 | C6     | DG | 16 | 15.130 | 18.228 | 0.674  | 1.00 | 0.00 |
| ATOM | 489 | O6     | DG | 16 | 14.214 | 17.487 | 1.035  | 1.00 | 0.00 |
| ATOM | 490 | N1     | DG | 16 | 14.839 | 19.513 | 0.226  | 1.00 | 0.00 |
| ATOM | 491 | H1     | DG | 16 | 13.880 | 19.796 | 0.225  | 1.00 | 0.00 |
| ATOM | 492 | C2     | DG | 16 | 15.768 | 20.425 | -0.213 | 1.00 | 0.00 |
| ATOM | 493 | N2     | DG | 16 | 15.295 | 21.619 | -0.606 | 1.00 | 0.00 |
| ATOM | 494 | H21    | DG | 16 | 14.329 | 21.914 | -0.624 | 1.00 | 0.00 |
| ATOM | 495 | H22    | DG | 16 | 15.976 | 22.287 | -0.937 | 1.00 | 0.00 |
| ATOM | 496 | N3     | DG | 16 | 17.067 | 20.190 | -0.263 | 1.00 | 0.00 |
| ATOM | 497 | C4     | DG | 16 | 17.377 | 18.951 | 0.180  | 1.00 | 0.00 |
| ATOM | 498 | C3'    | DG | 16 | 22.258 | 18.944 | 0.076  | 1.00 | 0.00 |
| ATOM | 499 | H3'    | DG | 16 | 23.052 | 18.343 | 0.519  | 1.00 | 0.00 |
| ATOM | 500 | C2'    | DG | 16 | 21.008 | 18.850 | 0.940  | 1.00 | 0.00 |
| ATOM | 501 | H2'    | DG | 16 | 21.159 | 18.102 | 1.719  | 1.00 | 0.00 |
| ATOM | 502 | H2 ' ' | DG | 16 | 20.810 | 19.818 | 1.400  | 1.00 | 0.00 |
| ATOM | 503 | O3'    | DG | 16 | 22.766 | 20.275 | -0.076 | 1.00 | 0.00 |
| ATOM | 504 | P      | DA | 17 | 22.722 | 21.352 | 1.129  | 1.00 | 0.00 |
| ATOM | 505 | OP1    | DA | 17 | 23.815 | 22.298 | 0.753  | 1.00 | 0.00 |
| ATOM | 506 | OP2    | DA | 17 | 22.725 | 20.721 | 2.460  | 1.00 | 0.00 |
| ATOM | 507 | O5'    | DA | 17 | 21.321 | 22.073 | 0.942  | 1.00 | 0.00 |
| ATOM | 508 | C5'    | DA | 17 | 20.969 | 22.717 | -0.290 | 1.00 | 0.00 |
| ATOM | 509 | H5'    | DA | 17 | 20.630 | 21.961 | -0.999 | 1.00 | 0.00 |
| ATOM | 510 | H5 ' ' | DA | 17 | 21.837 | 23.245 | -0.685 | 1.00 | 0.00 |
| ATOM | 511 | C4'    | DA | 17 | 19.850 | 23.702 | -0.041 | 1.00 | 0.00 |
| ATOM | 512 | H4'    | DA | 17 | 19.554 | 24.168 | -0.981 | 1.00 | 0.00 |
| ATOM | 513 | O4'    | DA | 17 | 18.678 | 22.977 | 0.387  | 1.00 | 0.00 |
| ATOM | 514 | C1'    | DA | 17 | 18.284 | 23.347 | 1.713  | 1.00 | 0.00 |
| ATOM | 515 | H1'    | DA | 17 | 17.378 | 23.945 | 1.815  | 1.00 | 0.00 |
| ATOM | 516 | N9     | DA | 17 | 17.934 | 22.099 | 2.396  | 1.00 | 0.00 |
| ATOM | 517 | C8     | DA | 17 | 18.791 | 21.090 | 2.750  | 1.00 | 0.00 |
| ATOM | 518 | H8     | DA | 17 | 19.858 | 21.223 | 2.647  | 1.00 | 0.00 |
| ATOM | 519 | N7     | DA | 17 | 18.191 | 20.040 | 3.257  | 1.00 | 0.00 |
| ATOM | 520 | C5     | DA | 17 | 16.846 | 20.394 | 3.260  | 1.00 | 0.00 |
| ATOM | 521 | C6     | DA | 17 | 15.689 | 19.705 | 3.665  | 1.00 | 0.00 |
| ATOM | 522 | N6     | DA | 17 | 15.711 | 18.462 | 4.143  | 1.00 | 0.00 |
| ATOM | 523 | H61    | DA | 17 | 14.850 | 18.012 | 4.420  | 1.00 | 0.00 |
| ATOM | 524 | H62    | DA | 17 | 16.588 | 17.969 | 4.228  | 1.00 | 0.00 |
| ATOM | 525 | N1     | DA | 17 | 14.502 | 20.346 | 3.548  | 1.00 | 0.00 |
| ATOM | 526 | C2     | DA | 17 | 14.485 | 21.580 | 3.041  | 1.00 | 0.00 |
| ATOM | 527 | H2     | DA | 17 | 13.551 | 22.113 | 2.939  | 1.00 | 0.00 |
| ATOM | 528 | N3     | DA | 17 | 15.501 | 22.320 | 2.607  | 1.00 | 0.00 |
| ATOM | 529 | C4     | DA | 17 | 16.672 | 21.664 | 2.751  | 1.00 | 0.00 |
| ATOM | 530 | C3'    | DA | 17 | 20.127 | 24.729 | 1.060  | 1.00 | 0.00 |
| ATOM | 531 | H3'    | DA | 17 | 21.169 | 24.954 | 1.287  | 1.00 | 0.00 |
| ATOM | 532 | C2'    | DA | 17 | 19.459 | 24.121 | 2.289  | 1.00 | 0.00 |
| ATOM | 533 | H2'    | DA | 17 | 20.220 | 23.859 | 3.025  | 1.00 | 0.00 |
| ATOM | 534 | H2 ' ' | DA | 17 | 18.768 | 24.844 | 2.723  | 1.00 | 0.00 |
| ATOM | 535 | O3'    | DA | 17 | 19.481 | 25.938 | 0.649  | 1.00 | 0.00 |
| ATOM | 536 | P      | DA | 18 | 19.585 | 27.272 | 1.543  | 1.00 | 0.00 |

|      |     |      |    |    |        |        |       |      |      |
|------|-----|------|----|----|--------|--------|-------|------|------|
| ATOM | 537 | OP1  | DA | 18 | 19.399 | 28.404 | 0.597 | 1.00 | 0.00 |
| ATOM | 538 | OP2  | DA | 18 | 20.774 | 27.219 | 2.424 | 1.00 | 0.00 |
| ATOM | 539 | O5'  | DA | 18 | 18.306 | 27.192 | 2.490 | 1.00 | 0.00 |
| ATOM | 540 | C5'  | DA | 18 | 17.005 | 27.186 | 1.942 | 1.00 | 0.00 |
| ATOM | 541 | H5'  | DA | 18 | 16.987 | 26.316 | 1.286 | 1.00 | 0.00 |
| ATOM | 542 | H5'' | DA | 18 | 16.819 | 28.134 | 1.437 | 1.00 | 0.00 |
| ATOM | 543 | C4'  | DA | 18 | 15.992 | 26.999 | 3.040 | 1.00 | 0.00 |
| ATOM | 544 | H4'  | DA | 18 | 15.030 | 27.206 | 2.571 | 1.00 | 0.00 |
| ATOM | 545 | O4'  | DA | 18 | 15.893 | 25.631 | 3.479 | 1.00 | 0.00 |
| ATOM | 546 | C1'  | DA | 18 | 15.603 | 25.596 | 4.871 | 1.00 | 0.00 |
| ATOM | 547 | H1'  | DA | 18 | 14.540 | 25.564 | 5.108 | 1.00 | 0.00 |
| ATOM | 548 | N9   | DA | 18 | 16.096 | 24.315 | 5.390 | 1.00 | 0.00 |
| ATOM | 549 | C8   | DA | 18 | 17.391 | 23.890 | 5.486 | 1.00 | 0.00 |
| ATOM | 550 | H8   | DA | 18 | 18.198 | 24.559 | 5.228 | 1.00 | 0.00 |
| ATOM | 551 | N7   | DA | 18 | 17.520 | 22.672 | 5.962 | 1.00 | 0.00 |
| ATOM | 552 | C5   | DA | 18 | 16.219 | 22.273 | 6.212 | 1.00 | 0.00 |
| ATOM | 553 | C6   | DA | 18 | 15.678 | 21.080 | 6.722 | 1.00 | 0.00 |
| ATOM | 554 | N6   | DA | 18 | 16.408 | 20.015 | 7.073 | 1.00 | 0.00 |
| ATOM | 555 | H61  | DA | 18 | 15.954 | 19.188 | 7.433 | 1.00 | 0.00 |
| ATOM | 556 | H62  | DA | 18 | 17.413 | 20.038 | 6.978 | 1.00 | 0.00 |
| ATOM | 557 | N1   | DA | 18 | 14.335 | 21.010 | 6.850 | 1.00 | 0.00 |
| ATOM | 558 | C2   | DA | 18 | 13.603 | 22.053 | 6.476 | 1.00 | 0.00 |
| ATOM | 559 | H2   | DA | 18 | 12.528 | 22.011 | 6.566 | 1.00 | 0.00 |
| ATOM | 560 | N3   | DA | 18 | 13.991 | 23.226 | 5.973 | 1.00 | 0.00 |
| ATOM | 561 | C4   | DA | 18 | 15.330 | 23.273 | 5.867 | 1.00 | 0.00 |
| ATOM | 562 | C3'  | DA | 18 | 16.214 | 27.852 | 4.287 | 1.00 | 0.00 |
| ATOM | 563 | H3'  | DA | 18 | 17.134 | 28.437 | 4.266 | 1.00 | 0.00 |
| ATOM | 564 | C2'  | DA | 18 | 16.277 | 26.844 | 5.435 | 1.00 | 0.00 |
| ATOM | 565 | H2'  | DA | 18 | 17.173 | 27.024 | 6.029 | 1.00 | 0.00 |
| ATOM | 566 | H2'' | DA | 18 | 15.395 | 26.956 | 6.066 | 1.00 | 0.00 |
| ATOM | 567 | O3'  | DA | 18 | 15.136 | 28.782 | 4.360 | 1.00 | 0.00 |
| ATOM | 568 | P    | DT | 19 | 14.865 | 29.619 | 5.710 | 1.00 | 0.00 |
| ATOM | 569 | OP1  | DT | 19 | 14.172 | 30.844 | 5.281 | 1.00 | 0.00 |
| ATOM | 570 | OP2  | DT | 19 | 16.107 | 29.695 | 6.515 | 1.00 | 0.00 |
| ATOM | 571 | O5'  | DT | 19 | 13.846 | 28.701 | 6.510 | 1.00 | 0.00 |
| ATOM | 572 | C5'  | DT | 19 | 12.684 | 28.174 | 5.864 | 1.00 | 0.00 |
| ATOM | 573 | H5'  | DT | 19 | 13.042 | 27.558 | 5.039 | 1.00 | 0.00 |
| ATOM | 574 | H5'' | DT | 19 | 12.051 | 28.995 | 5.528 | 1.00 | 0.00 |
| ATOM | 575 | C4'  | DT | 19 | 11.909 | 27.311 | 6.826 | 1.00 | 0.00 |
| ATOM | 576 | H4'  | DT | 19 | 11.014 | 26.979 | 6.301 | 1.00 | 0.00 |
| ATOM | 577 | O4'  | DT | 19 | 12.626 | 26.090 | 7.129 | 1.00 | 0.00 |
| ATOM | 578 | C1'  | DT | 19 | 12.544 | 25.808 | 8.521 | 1.00 | 0.00 |
| ATOM | 579 | H1'  | DT | 19 | 11.703 | 25.173 | 8.801 | 1.00 | 0.00 |
| ATOM | 580 | N1   | DT | 19 | 13.716 | 24.979 | 8.867 | 1.00 | 0.00 |
| ATOM | 581 | C6   | DT | 19 | 14.995 | 25.475 | 8.711 | 1.00 | 0.00 |
| ATOM | 582 | H6   | DT | 19 | 15.094 | 26.513 | 8.430 | 1.00 | 0.00 |
| ATOM | 583 | C5   | DT | 19 | 16.107 | 24.759 | 8.938 | 1.00 | 0.00 |
| ATOM | 584 | C7   | DT | 19 | 17.488 | 25.309 | 8.745 | 1.00 | 0.00 |
| ATOM | 585 | H71  | DT | 19 | 17.631 | 26.171 | 9.396 | 1.00 | 0.00 |
| ATOM | 586 | H72  | DT | 19 | 18.223 | 24.543 | 8.992 | 1.00 | 0.00 |
| ATOM | 587 | H73  | DT | 19 | 17.616 | 25.614 | 7.706 | 1.00 | 0.00 |
| ATOM | 588 | C4   | DT | 19 | 15.943 | 23.388 | 9.393 | 1.00 | 0.00 |
| ATOM | 589 | O4   | DT | 19 | 16.852 | 22.613 | 9.632 | 1.00 | 0.00 |
| ATOM | 590 | N3   | DT | 19 | 14.631 | 22.971 | 9.551 | 1.00 | 0.00 |
| ATOM | 591 | H3   | DT | 19 | 14.500 | 21.946 | 9.898 | 1.00 | 0.00 |
| ATOM | 592 | C2   | DT | 19 | 13.496 | 23.688 | 9.310 | 1.00 | 0.00 |
| ATOM | 593 | O2   | DT | 19 | 12.381 | 23.202 | 9.467 | 1.00 | 0.00 |
| ATOM | 594 | C3'  | DT | 19 | 11.584 | 27.960 | 8.173 | 1.00 | 0.00 |
| ATOM | 595 | H3'  | DT | 19 | 11.844 | 29.016 | 8.241 | 1.00 | 0.00 |
| ATOM | 596 | C2'  | DT | 19 | 12.409 | 27.166 | 9.184 | 1.00 | 0.00 |

|      |     |      |    |    |        |        |        |      |      |
|------|-----|------|----|----|--------|--------|--------|------|------|
| ATOM | 597 | H2'  | DT | 19 | 13.091 | 27.838 | 9.705  | 1.00 | 0.00 |
| ATOM | 598 | H2'' | DT | 19 | 11.743 | 26.694 | 9.906  | 1.00 | 0.00 |
| ATOM | 599 | O3'  | DT | 19 | 10.189 | 27.833 | 8.395  | 1.00 | 0.00 |
| ATOM | 600 | P    | DT | 20 | 9.501  | 28.568 | 9.648  | 1.00 | 0.00 |
| ATOM | 601 | OP1  | DT | 20 | 8.217  | 29.106 | 9.155  | 1.00 | 0.00 |
| ATOM | 602 | OP2  | DT | 20 | 10.464 | 29.479 | 10.294 | 1.00 | 0.00 |
| ATOM | 603 | O5'  | DT | 20 | 9.217  | 27.334 | 10.599 | 1.00 | 0.00 |
| ATOM | 604 | C5'  | DT | 20 | 8.666  | 26.140 | 10.056 | 1.00 | 0.00 |
| ATOM | 605 | H5'  | DT | 20 | 9.336  | 25.863 | 9.242  | 1.00 | 0.00 |
| ATOM | 606 | H5'' | DT | 20 | 7.640  | 26.325 | 9.737  | 1.00 | 0.00 |
| ATOM | 607 | C4'  | DT | 20 | 8.671  | 25.050 | 11.094 | 1.00 | 0.00 |
| ATOM | 608 | H4'  | DT | 20 | 8.048  | 24.261 | 10.674 | 1.00 | 0.00 |
| ATOM | 609 | O4'  | DT | 20 | 9.970  | 24.445 | 11.239 | 1.00 | 0.00 |
| ATOM | 610 | C1'  | DT | 20 | 10.285 | 24.306 | 12.618 | 1.00 | 0.00 |
| ATOM | 611 | H1'  | DT | 20 | 9.984  | 23.355 | 13.057 | 1.00 | 0.00 |
| ATOM | 612 | N1   | DT | 20 | 11.753 | 24.267 | 12.716 | 1.00 | 0.00 |
| ATOM | 613 | C6   | DT | 20 | 12.509 | 25.389 | 12.425 | 1.00 | 0.00 |
| ATOM | 614 | H6   | DT | 20 | 11.979 | 26.312 | 12.242 | 1.00 | 0.00 |
| ATOM | 615 | C5   | DT | 20 | 13.852 | 25.402 | 12.412 | 1.00 | 0.00 |
| ATOM | 616 | C7   | DT | 20 | 14.653 | 26.626 | 12.099 | 1.00 | 0.00 |
| ATOM | 617 | H71  | DT | 20 | 14.420 | 27.408 | 12.822 | 1.00 | 0.00 |
| ATOM | 618 | H72  | DT | 20 | 15.716 | 26.389 | 12.151 | 1.00 | 0.00 |
| ATOM | 619 | H73  | DT | 20 | 14.408 | 26.975 | 11.096 | 1.00 | 0.00 |
| ATOM | 620 | C4   | DT | 20 | 14.546 | 24.169 | 12.720 | 1.00 | 0.00 |
| ATOM | 621 | O4   | DT | 20 | 15.765 | 24.036 | 12.699 | 1.00 | 0.00 |
| ATOM | 622 | N3   | DT | 20 | 13.735 | 23.086 | 13.046 | 1.00 | 0.00 |
| ATOM | 623 | H3   | DT | 20 | 14.247 | 22.159 | 13.306 | 1.00 | 0.00 |
| ATOM | 624 | C2   | DT | 20 | 12.350 | 23.061 | 13.068 | 1.00 | 0.00 |
| ATOM | 625 | O2   | DT | 20 | 11.716 | 22.055 | 13.367 | 1.00 | 0.00 |
| ATOM | 626 | C3'  | DT | 20 | 8.228  | 25.450 | 12.498 | 1.00 | 0.00 |
| ATOM | 627 | H3'  | DT | 20 | 7.733  | 26.412 | 12.631 | 1.00 | 0.00 |
| ATOM | 628 | C2'  | DT | 20 | 9.522  | 25.427 | 13.309 | 1.00 | 0.00 |
| ATOM | 629 | H2'  | DT | 20 | 9.793  | 26.444 | 13.591 | 1.00 | 0.00 |
| ATOM | 630 | H2'' | DT | 20 | 9.378  | 24.827 | 14.208 | 1.00 | 0.00 |
| ATOM | 631 | O3'  | DT | 20 | 7.349  | 24.412 | 12.922 | 1.00 | 0.00 |
| ATOM | 632 | P    | DC | 21 | 6.372  | 24.633 | 14.185 | 1.00 | 0.00 |
| ATOM | 633 | OP1  | DC | 21 | 5.058  | 24.006 | 13.851 | 1.00 | 0.00 |
| ATOM | 634 | OP2  | DC | 21 | 6.449  | 26.055 | 14.615 | 1.00 | 0.00 |
| ATOM | 635 | O5'  | DC | 21 | 7.051  | 23.746 | 15.313 | 1.00 | 0.00 |
| ATOM | 636 | C5'  | DC | 21 | 7.250  | 22.356 | 15.105 | 1.00 | 0.00 |
| ATOM | 637 | H5'  | DC | 21 | 7.578  | 22.198 | 14.078 | 1.00 | 0.00 |
| ATOM | 638 | H5'' | DC | 21 | 6.319  | 21.822 | 15.297 | 1.00 | 0.00 |
| ATOM | 639 | C4'  | DC | 21 | 8.318  | 21.866 | 16.046 | 1.00 | 0.00 |
| ATOM | 640 | H4'  | DC | 21 | 8.447  | 20.791 | 15.922 | 1.00 | 0.00 |
| ATOM | 641 | O4'  | DC | 21 | 9.594  | 22.420 | 15.720 | 1.00 | 0.00 |
| ATOM | 642 | C1'  | DC | 21 | 10.377 | 22.256 | 16.884 | 1.00 | 0.00 |
| ATOM | 643 | H1'  | DC | 21 | 10.757 | 21.239 | 16.981 | 1.00 | 0.00 |
| ATOM | 644 | N1   | DC | 21 | 11.582 | 23.058 | 16.698 | 1.00 | 0.00 |
| ATOM | 645 | C6   | DC | 21 | 11.513 | 24.384 | 16.372 | 1.00 | 0.00 |
| ATOM | 646 | H6   | DC | 21 | 10.555 | 24.880 | 16.324 | 1.00 | 0.00 |
| ATOM | 647 | C5   | DC | 21 | 12.621 | 25.087 | 16.108 | 1.00 | 0.00 |
| ATOM | 648 | H5   | DC | 21 | 12.538 | 26.141 | 15.841 | 1.00 | 0.00 |
| ATOM | 649 | C4   | DC | 21 | 13.868 | 24.403 | 16.197 | 1.00 | 0.00 |
| ATOM | 650 | N4   | DC | 21 | 14.999 | 25.046 | 15.934 | 1.00 | 0.00 |
| ATOM | 651 | H41  | DC | 21 | 15.862 | 24.527 | 16.008 | 1.00 | 0.00 |
| ATOM | 652 | H42  | DC | 21 | 14.981 | 26.021 | 15.670 | 1.00 | 0.00 |
| ATOM | 653 | N3   | DC | 21 | 13.945 | 23.122 | 16.543 | 1.00 | 0.00 |
| ATOM | 654 | C2   | DC | 21 | 12.813 | 22.427 | 16.813 | 1.00 | 0.00 |
| ATOM | 655 | O2   | DC | 21 | 12.840 | 21.242 | 17.163 | 1.00 | 0.00 |
| ATOM | 656 | C3'  | DC | 21 | 8.060  | 22.260 | 17.496 | 1.00 | 0.00 |

|      |     |      |    |    |        |        |        |      |      |
|------|-----|------|----|----|--------|--------|--------|------|------|
| ATOM | 657 | H3'  | DC | 21 | 7.409  | 23.121 | 17.650 | 1.00 | 0.00 |
| ATOM | 658 | C2'  | DC | 21 | 9.449  | 22.565 | 18.057 | 1.00 | 0.00 |
| ATOM | 659 | H2'  | DC | 21 | 9.383  | 23.395 | 18.760 | 1.00 | 0.00 |
| ATOM | 660 | H2'' | DC | 21 | 9.835  | 21.685 | 18.570 | 1.00 | 0.00 |
| ATOM | 661 | O3'  | DC | 21 | 7.406  | 21.136 | 18.085 | 1.00 | 0.00 |
| ATOM | 662 | P    | DG | 22 | 6.749  | 21.241 | 19.556 | 1.00 | 0.00 |
| ATOM | 663 | OP1  | DG | 22 | 5.888  | 20.030 | 19.702 | 1.00 | 0.00 |
| ATOM | 664 | OP2  | DG | 22 | 6.183  | 22.583 | 19.800 | 1.00 | 0.00 |
| ATOM | 665 | O5'  | DG | 22 | 8.000  | 21.043 | 20.519 | 1.00 | 0.00 |
| ATOM | 666 | C5'  | DG | 22 | 8.688  | 19.794 | 20.587 | 1.00 | 0.00 |
| ATOM | 667 | H5'  | DG | 22 | 9.048  | 19.558 | 19.586 | 1.00 | 0.00 |
| ATOM | 668 | H5'' | DG | 22 | 8.011  | 19.025 | 20.959 | 1.00 | 0.00 |
| ATOM | 669 | C4'  | DG | 22 | 9.868  | 19.921 | 21.521 | 1.00 | 0.00 |
| ATOM | 670 | H4'  | DG | 22 | 10.287 | 18.927 | 21.679 | 1.00 | 0.00 |
| ATOM | 671 | O4'  | DG | 22 | 10.942 | 20.674 | 20.904 | 1.00 | 0.00 |
| ATOM | 672 | C1'  | DG | 22 | 11.372 | 21.653 | 21.822 | 1.00 | 0.00 |
| ATOM | 673 | H1'  | DG | 22 | 12.171 | 21.228 | 22.430 | 1.00 | 0.00 |
| ATOM | 674 | N9   | DG | 22 | 12.028 | 22.718 | 21.090 | 1.00 | 0.00 |
| ATOM | 675 | C8   | DG | 22 | 11.473 | 23.887 | 20.647 | 1.00 | 0.00 |
| ATOM | 676 | H8   | DG | 22 | 10.427 | 24.104 | 20.807 | 1.00 | 0.00 |
| ATOM | 677 | N7   | DG | 22 | 12.335 | 24.660 | 20.036 | 1.00 | 0.00 |
| ATOM | 678 | C5   | DG | 22 | 13.532 | 23.949 | 20.080 | 1.00 | 0.00 |
| ATOM | 679 | C6   | DG | 22 | 14.820 | 24.272 | 19.577 | 1.00 | 0.00 |
| ATOM | 680 | O6   | DG | 22 | 15.181 | 25.292 | 18.956 | 1.00 | 0.00 |
| ATOM | 681 | N1   | DG | 22 | 15.739 | 23.266 | 19.847 | 1.00 | 0.00 |
| ATOM | 682 | H1   | DG | 22 | 16.678 | 23.408 | 19.533 | 1.00 | 0.00 |
| ATOM | 683 | C2   | DG | 22 | 15.466 | 22.103 | 20.504 | 1.00 | 0.00 |
| ATOM | 684 | N2   | DG | 22 | 16.493 | 21.262 | 20.671 | 1.00 | 0.00 |
| ATOM | 685 | H21  | DG | 22 | 17.443 | 21.392 | 20.353 | 1.00 | 0.00 |
| ATOM | 686 | H22  | DG | 22 | 16.293 | 20.395 | 21.150 | 1.00 | 0.00 |
| ATOM | 687 | N3   | DG | 22 | 14.272 | 21.783 | 20.967 | 1.00 | 0.00 |
| ATOM | 688 | C4   | DG | 22 | 13.358 | 22.748 | 20.723 | 1.00 | 0.00 |
| ATOM | 689 | C3'  | DG | 22 | 9.557  | 20.639 | 22.837 | 1.00 | 0.00 |
| ATOM | 690 | H3'  | DG | 22 | 8.518  | 20.734 | 23.152 | 1.00 | 0.00 |
| ATOM | 691 | C2'  | DG | 22 | 10.156 | 22.023 | 22.641 | 1.00 | 0.00 |
| ATOM | 692 | H2'  | DG | 22 | 9.355  | 22.751 | 22.513 | 1.00 | 0.00 |
| ATOM | 693 | H2'' | DG | 22 | 10.752 | 22.289 | 23.514 | 1.00 | 0.00 |
| ATOM | 694 | O3'  | DG | 22 | 10.325 | 19.982 | 23.833 | 1.00 | 0.00 |
| ATOM | 695 | P    | DC | 23 | 9.791  | 19.880 | 25.340 | 1.00 | 0.00 |
| ATOM | 696 | OP1  | DC | 23 | 8.717  | 18.881 | 25.357 | 1.00 | 0.00 |
| ATOM | 697 | OP2  | DC | 23 | 9.567  | 21.231 | 25.879 | 1.00 | 0.00 |
| ATOM | 698 | O5'  | DC | 23 | 11.051 | 19.250 | 26.080 | 1.00 | 0.00 |
| ATOM | 699 | C5'  | DC | 23 | 11.599 | 17.986 | 25.636 | 1.00 | 0.00 |
| ATOM | 700 | H5'  | DC | 23 | 11.125 | 17.745 | 24.685 | 1.00 | 0.00 |
| ATOM | 701 | H5'' | DC | 23 | 11.396 | 17.219 | 26.383 | 1.00 | 0.00 |
| ATOM | 702 | C4'  | DC | 23 | 13.097 | 18.083 | 25.435 | 1.00 | 0.00 |
| ATOM | 703 | H4'  | DC | 23 | 13.442 | 17.095 | 25.131 | 1.00 | 0.00 |
| ATOM | 704 | O4'  | DC | 23 | 13.422 | 18.939 | 24.318 | 1.00 | 0.00 |
| ATOM | 705 | C1'  | DC | 23 | 14.664 | 19.604 | 24.585 | 1.00 | 0.00 |
| ATOM | 706 | H1'  | DC | 23 | 15.397 | 19.393 | 23.807 | 1.00 | 0.00 |
| ATOM | 707 | N1   | DC | 23 | 14.434 | 21.047 | 24.462 | 1.00 | 0.00 |
| ATOM | 708 | C6   | DC | 23 | 13.203 | 21.593 | 24.707 | 1.00 | 0.00 |
| ATOM | 709 | H6   | DC | 23 | 12.396 | 20.969 | 25.062 | 1.00 | 0.00 |
| ATOM | 710 | C5   | DC | 23 | 12.978 | 22.895 | 24.514 | 1.00 | 0.00 |
| ATOM | 711 | H5   | DC | 23 | 11.987 | 23.304 | 24.708 | 1.00 | 0.00 |
| ATOM | 712 | C4   | DC | 23 | 14.067 | 23.684 | 24.046 | 1.00 | 0.00 |
| ATOM | 713 | N4   | DC | 23 | 13.895 | 24.974 | 23.785 | 1.00 | 0.00 |
| ATOM | 714 | H41  | DC | 23 | 14.694 | 25.497 | 23.455 | 1.00 | 0.00 |
| ATOM | 715 | H42  | DC | 23 | 12.991 | 25.404 | 23.917 | 1.00 | 0.00 |
| ATOM | 716 | N3   | DC | 23 | 15.287 | 23.161 | 23.844 | 1.00 | 0.00 |
